# Supplementary material for: Mass Spectrometry Characterization of the SDS-PAGE Protein Profile of Legumins and Vicilins from Chickpea Seed
Source: MDPI journal article supplement (doi:10.3390/foods13060887), 2024-03-14

## Supplementary Material

# An in-depth Mass Spectrometry Characterization of the SDS-PAGE Protein Profile of Legumins and Vicilins from Chickpea Seed

Antonella Di Francesco <sup>1</sup>, Michele De Santis <sup>2</sup>, Aldo Lanzoni <sup>1</sup>, Maria Giovanna Gaetana Pittalà <sup>1</sup>, Rosaria Saletti <sup>1</sup>, Zina Flagella <sup>2</sup>, and Vincenzo Cunsolo <sup>1,\*</sup>

<sup>1</sup> Laboratory of Organic Mass Spectrometry, Department of Chemical Sciences, University of Catania, Viale A. Doria 6-I, 95125, Catania, Italy

<sup>2</sup> Department of the Sciences of Agriculture, Food and Environment, University of Foggia, Via Napoli 25, 71122, Foggia, Italy

\* Correspondence: [vcunsolo@unict.it](mailto:vcunsolo@unict.it)

**Figures S1-S13.** Graphical representation of the protein sequence coverage as identified by PEAKS Software. Reported sequences refer to the precursor proteins (i.e. they also contain the signal peptide). Signal peptide (when reported in the UniProtKB entry) is reported in a red rectangle. In legumin entries, a red arrow indicates the presumable C-terminal amino acid of the acidic ( $\alpha$ ) chain, as deduced by analogy with the homologous legumins of pea (*Pisum sativum* L.). In legumin se-quence entries A0A1S2XSB9, A0A3Q7XNW1, and A0A1S2XVG1 a blu rectangle holds the peptide, detected by MS data, carrying the C-term asparagine of the  $\alpha$ -chain and the N-terminal glycine of the  $\beta$ -chain linked together. Peptides identified by LC-MS/MS are indicated by blue lines. Re-gions in the protein sequence that are covered by supporting peptides are displayed in bold font with a grey background. Confident modifications and amino acid mutations identified in supporting peptides are displayed as icons above the protein sequence. In detail, the oxidised me-thionine residues (M) (+15.99 Da) are indicated with a yellow “o”; the pyroglutamic residues (-17.03) are indicated with a blue “p”; carbamidomethyl-cysteines (+57.03) are reported with a red “c”.

### Figure S1

Vicilin Acc. No. A0A1S2YZ56 – Mass 81,9 kDa

(no information are reported for the peptide signal in the UniProtKB database)

Band N.7 (55 kDa)

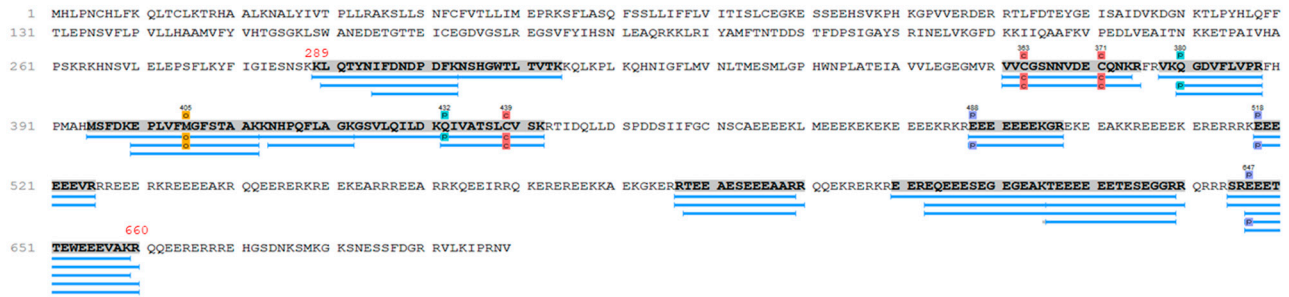

Band N.16 (24 kDa)

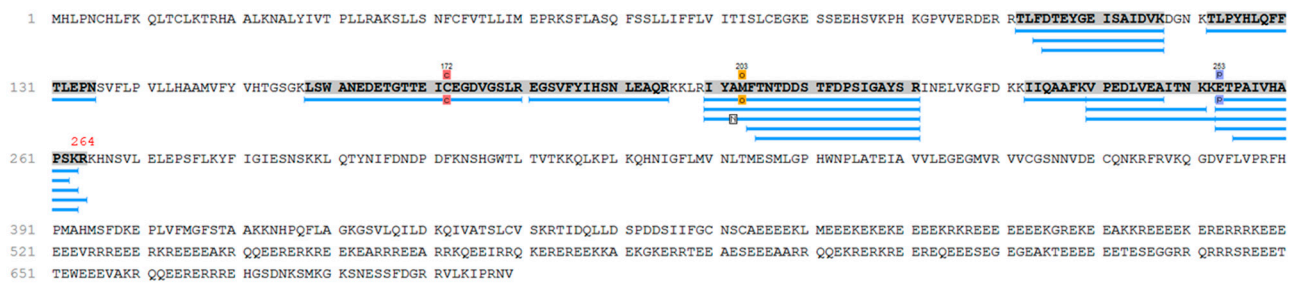

Figure S2

Vicilin Acc. No. A0A1S2XV08 – Mass 46,1 kDa (as mature protein)

Band N.10 (kDa 41)

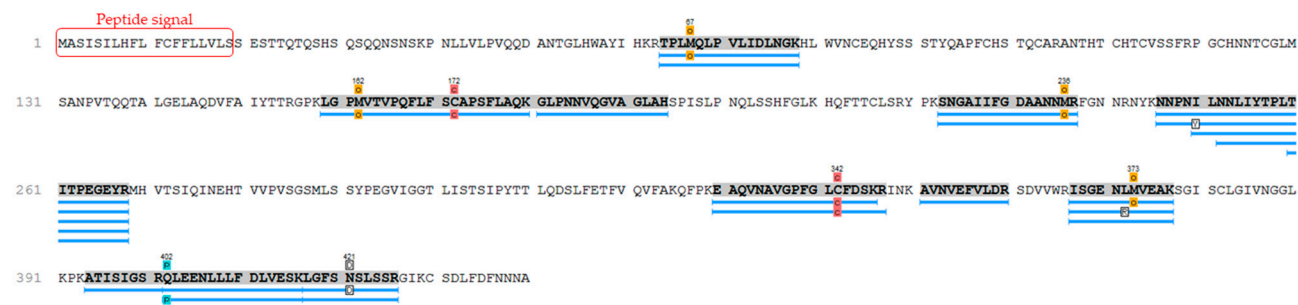

Band N.11 (kDa 38)

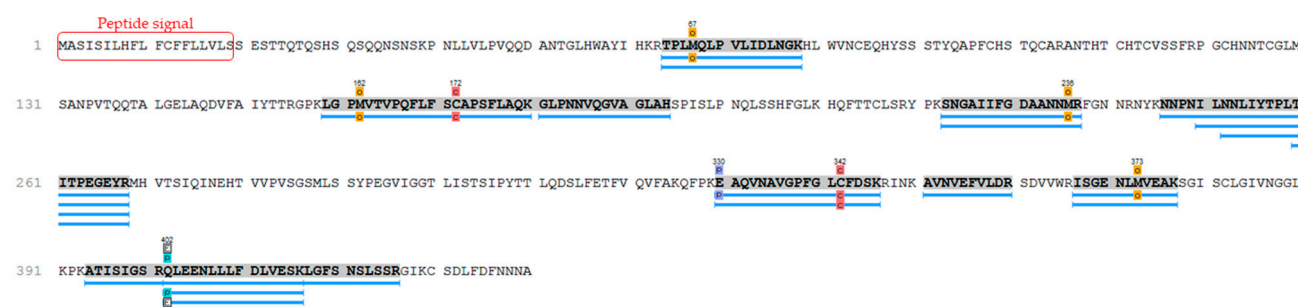

Figure S3

Vicilin Acc. No. A0A1S2Y087 - Mass 66,4 kDa (as mature protein)

Band N.2 (100 kDa) - (as minor component)

Peptide signal

```

1  MATTTKTRFP LLLLLGIIFL ASVCVSYGIV QYEQGNPCLK KCMQRYNKVN EAFKRREEEE YEERSEHSVP GQREGRQEG EKEEHRQQR RSRRESERER EDEQKQRHP HHEREEEDE EFRERRHRGD
131 TEETFRRRK ERRQEQQEK SESKEDEES SSESQGRNP FFRSNKFQT IFENQGHIR LLQNFDRSN LFQNLQNYRF LEYKARPHTL LLPQHIDAF ILVVLGKAI LTVLNPDRN SFNLERGDTI
261 KLPAGTTAYL ANHDEEDLR VVELAIPVNR PGKFQSFPS SNQNQSYFN GFSKSILEAS FNTKYETIER VLLEEQEPEQ SRGRGSEES EGDIAIVKS REQIEELSKH AKSSSRKIS SESEPFNLRS
391 RNPIYSNKG KFFEITPEKS PQLQDLNIFV SCVEINEGGL MLPHFNSRAI VVLFINEGKG HLELVGLRNE QQEQQEEDE EQEEERNNQ VQRFRARLSP GDVFIIPAGH PVAVNASSDL NFVGFGINAE
521 NNQRNFLAGD DDNVIQIQN PVKELTFPGS AQEVNRLIKN QRSYFANAQ PQOREESQR RRGSLSSILG GFY

```

Band N.5 (65 kDa)

Peptide signal

```

1  MATTTKTRFP LLLLLGIIFL ASVCVSYGIV QYEQGNPCLK KCMQRYNKVN EAFKRREEEE YEERSEHSVP GQREGRQEG EKEEHRQQR RSRRESERER EDEQKQRHP HHEREEEDE EFRERRHRGD
131 TEETFRRRK ERRQEQQEK SESKEDEES SSESQGRNP FFRSNKFQT IFENQGHIR LLQNFDRSN LFQNLQNYRF LEYKARPHTL LLPQHIDAF ILVVLGKAI LTVLNPDRN SFNLERGDTI
261 KLPAGTTAYL ANHDEEDLR VVELAIPVNR PGKFQSFPS SNQNQSYFN GFSKSILEAS FNTKYETIER VLLEEQEPEQ SRGRGSEES EGDIAIVKS REQIEELSKH AKSSSRKIS SESEPFNLRS
391 RNPIYSNKG KFFEITPEKS PQLQDLNIFV SCVEINEGGL MLPHFNSRAI VVLFINEGKG HLELVGLRNE QQEQQEEDE EQEEERNNQ VQRFRARLSP GDVFIIPAGH PVAVNASSDL NFVGFGINAE
521 NNQRNFLAGD DDNVIQIQN PVKELTFPGS AQEVNRLIKN QRSYFANAQ PQOREESQR RRGSLSSILG GFY

```

Band N.6 (60 kDa)

Peptide signal

```

1  MATTTKTRFP LLLLLGIIFL ASVCVSYGIV QYEQGNPCLK KCMQRYNKVN EAFKRREEEE YEERSEHSVP GQREGRQEG EKEEHRQQR RSRRESERER EDEQKQRHP HHEREEEDE EFRERRHRGD
131 TEETFRRRK ERRQEQQEK SESKEDEES SSESQGRNP FFRSNKFQT IFENQGHIR LLQNFDRSN LFQNLQNYRF LEYKARPHTL LLPQHIDAF ILVVLGKAI LTVLNPDRN SFNLERGDTI
261 KLPAGTTAYL ANHDEEDLR VVELAIPVNR PGKFQSFPS SNQNQSYFN GFSKSILEAS FNTKYETIER VLLEEQEPEQ SRGRGSEES EGDIAIVKS REQIEELSKH AKSSSRKIS SESEPFNLRS
391 RNPIYSNKG KFFEITPEKS PQLQDLNIFV SCVEINEGGL MLPHFNSRAI VVLFINEGKG HLELVGLRNE QQEQQEEDE EQEEERNNQ VQRFRARLSP GDVFIIPAGH PVAVNASSDL NFVGFGINAE
521 NNQRNFLAGD DDNVIQIQN PVKELTFPGS AQEVNRLIKN QRSYFANAQ PQOREESQR RRGSLSSILG GFY

```

Band N.7 (55 kDa) - (as minor component)

Peptide signal

```

1  MATTTKTRFP LLLLLGIIFL ASVCVSYGIV QYEQGNPCLK KCMQRYNKVN EAFKRREEEE YEERSEHSVP GQREGRQEG EKEEHRQQR RSRRESERER EDEQKQRHP HHEREEEDE EFRERRHRGD
131 TEETFRRRK ERRQEQQEK SESKEDEES SSESQGRNP FFRSNKFQT IFENQGHIR LLQNFDRSN LFQNLQNYRF LEYKARPHTL LLPQHIDAF ILVVLGKAI LTVLNPDRN SFNLERGDTI
261 KLPAGTTAYL ANHDEEDLR VVELAIPVNR PGKFQSFPS SNQNQSYFN GFSKSILEAS FNTKYETIER VLLEEQEPEQ SRGRGSEES EGDIAIVKS REQIEELSKH AKSSSRKIS SESEPFNLRS
391 RNPIYSNKG KFFEITPEKS PQLQDLNIFV SCVEINEGGL MLPHFNSRAI VVLFINEGKG HLELVGLRNE QQEQQEEDE EQEEERNNQ VQRFRARLSP GDVFIIPAGH PVAVNASSDL NFVGFGINAE
521 NNQRNFLAGD DDNVIQIQN PVKELTFPGS AQEVNRLIKN QRSYFANAQ PQOREESQR RRGSLSSILG GFY

```

Band N.8 (47 kDa)

Peptide signal

```

1  MATTTKTRFP LLLLLGIIFL ASVCVSYGIV QYEQGNPCLK KCMQRYNKVN EAFKRREEEE YEERSEHSVP GQREGRQEG EKEEHRQQR RSRRESERER EDEQKQRHP HHEREEEDE EFRERRHRGD
131 TEETFRRRK ERRQEQQEK SESKEDEES SSESQGRNP FFRSNKFQT IFENQGHIR LLQNFDRSN LFQNLQNYRF LEYKARPHTL LLPQHIDAF ILVVLGKAI LTVLNPDRN SFNLERGDTI
261 KLPAGTTAYL ANHDEEDLR VVELAIPVNR PGKFQSFPS SNQNQSYFN GFSKSILEAS FNTKYETIER VLLEEQEPEQ SRGRGSEES EGDIAIVKS REQIEELSKH AKSSSRKIS SESEPFNLRS
391 RNPIYSNKG KFFEITPEKS PQLQDLNIFV SCVEINEGGL MLPHFNSRAI VVLFINEGKG HLELVGLRNE QQEQQEEDE EQEEERNNQ VQRFRARLSP GDVFIIPAGH PVAVNASSDL NFVGFGINAE
521 NNQRNFLAGD DDNVIQIQN PVKELTFPGS AQEVNRLIKN QRSYFANAQ PQOREESQR RRGSLSSILG GFY

```

Figure S4  
Vicilin Acc. No. A0A1S2XYZ0 – Mass 61,9 kDa (as mature protein)

Band N.8 (47 kDa) - (as minor component)

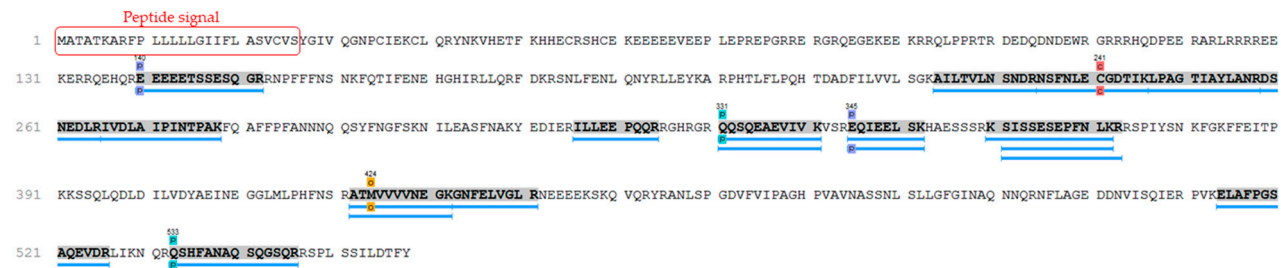

Band N.9 (44 kDa)

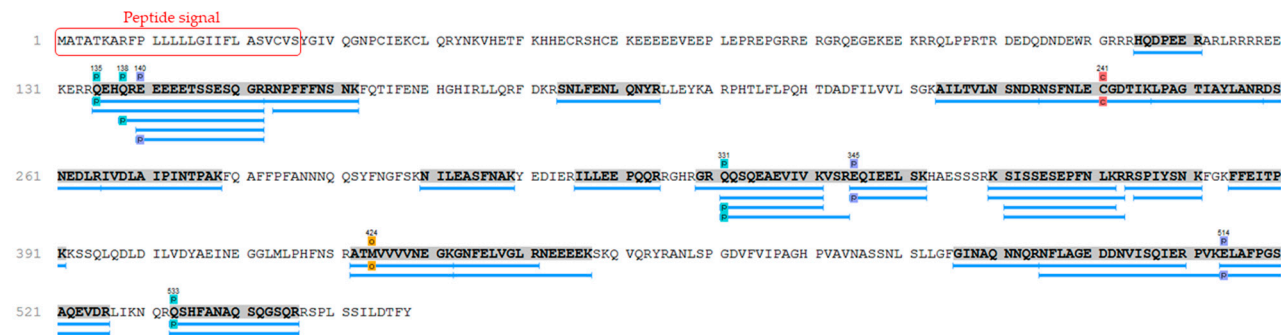

Figure S5  
Vicilin Acc. No. A0A1S2XQR4 - Mass 49,4 kDa (as mature protein)

Band N.14 (32 kDa)

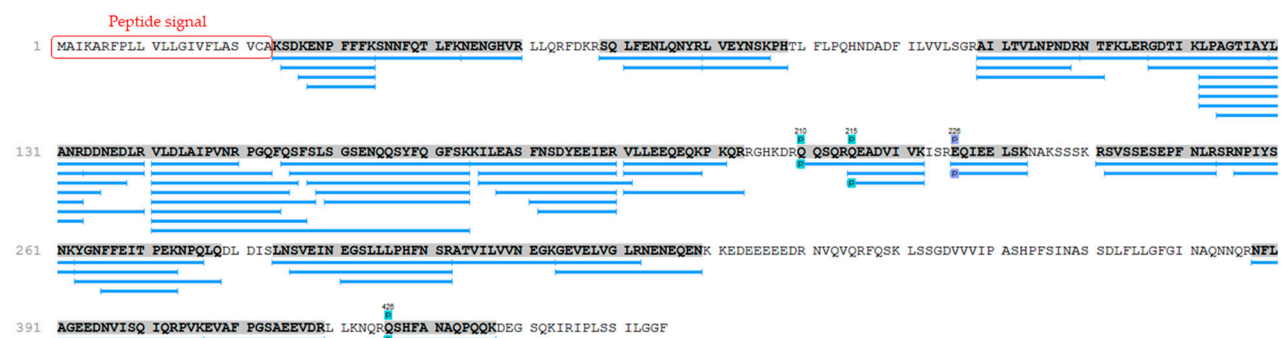

Figure S6

Vicilin Acc. No. A0A1S2XQ88 – Mass 48,6 kDa (as mature protein)

Band N.16 (24 kDa) - (as minor component)

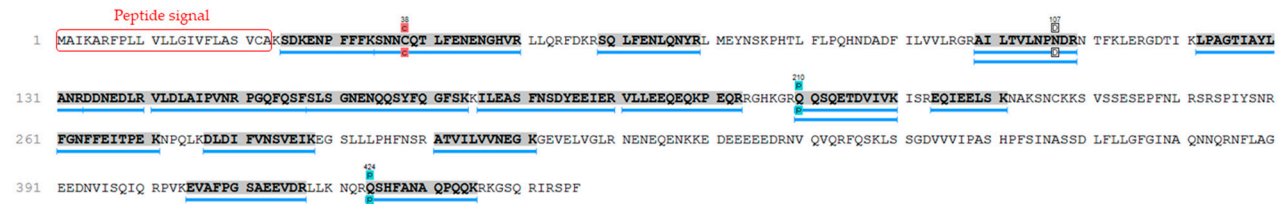

Band N.17 (23 kDa)

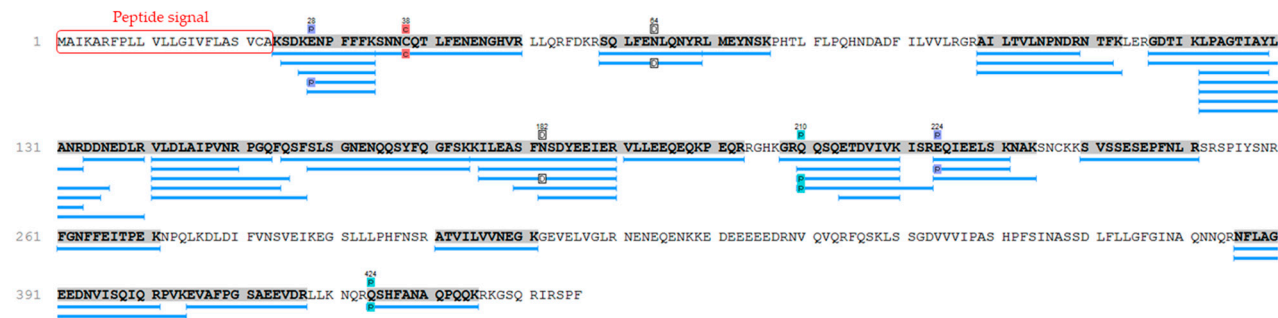



Figure S7

Legumin A-like A0A1S2XSB9 – Mass 57,1 kDa (as mature protein)

 $\alpha$ -chain (trait Phe22-Asn333) – Mass 36,9 kDa $\beta$ -chain (trait Gly334- Ala518) – Mass 20,2 kDa

Band N.2 (100 kDa) – (as minor component)

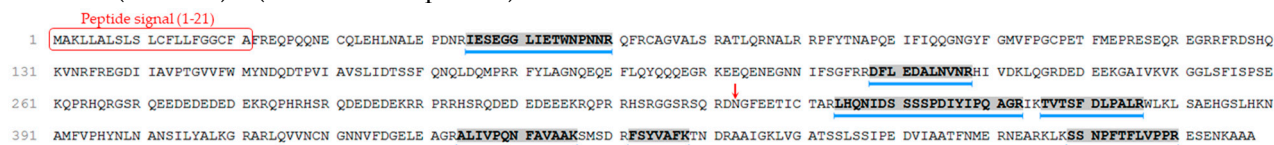

Band N.7 (55 kDa) - (as minor component)

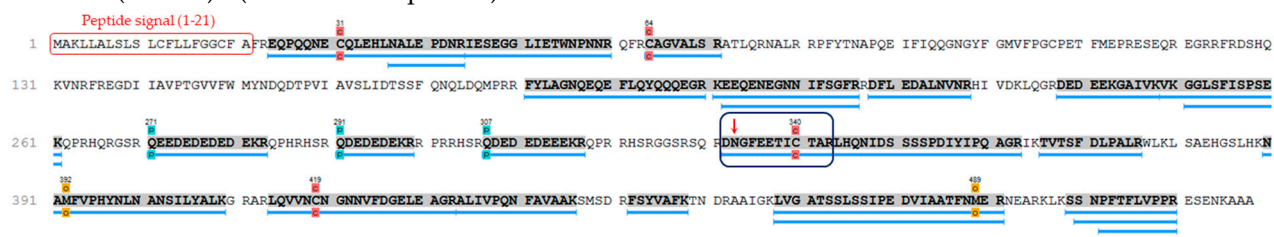

Band N.12 (36 kDa)

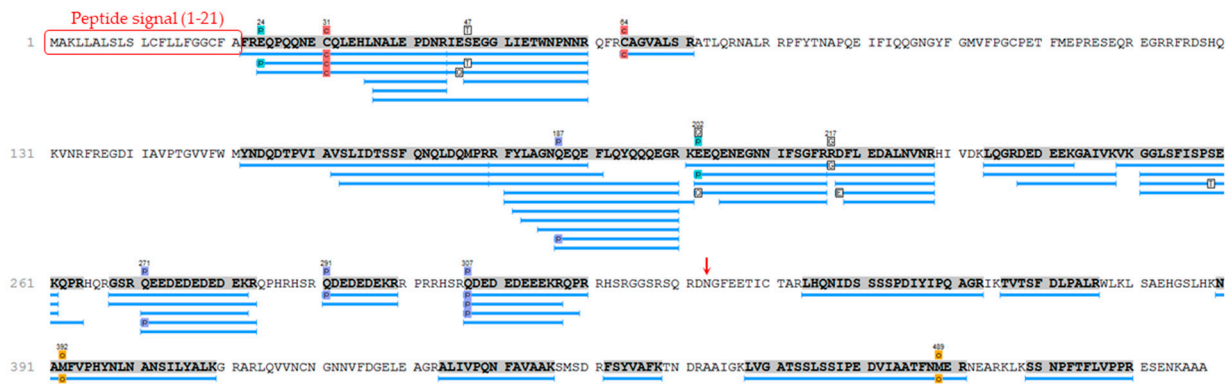

Band N.19 (20 kDa)

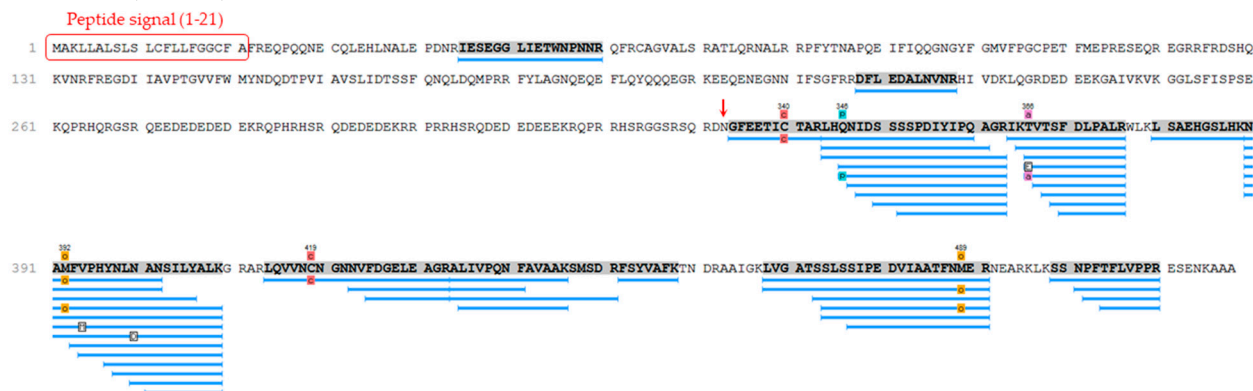

Figure S8

Legumin Acc. No. A0A3Q7XNW1 - Mass 54,0 kDa (as mature protein)

$\alpha$ -chain (trait Leu22-Asn314) – Mass 33,7 kDa

$\beta$ -chain (trait Gly315- Ala500) – Mass 20,3 kDa

Band N.8 (47 kDa) - (as minor component)

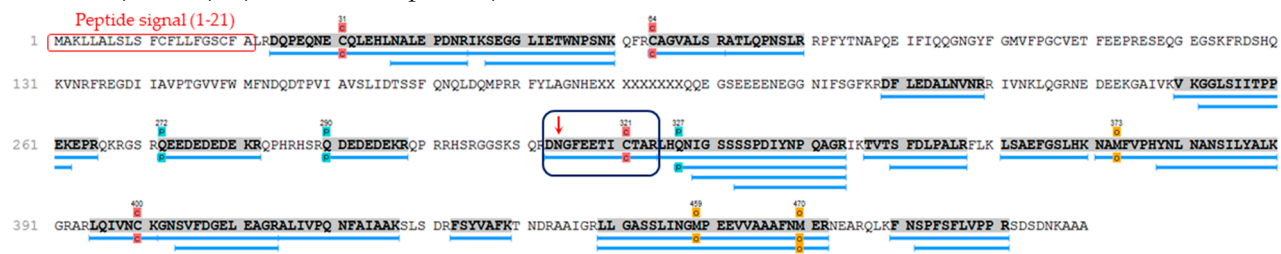

Band N.13 (34 kDa)

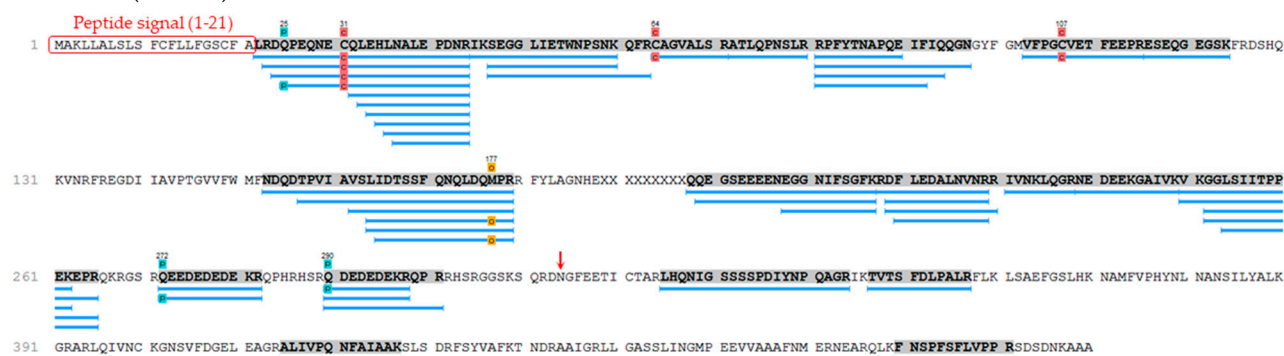

Band N.19 (20 kDa) - (as minor component)

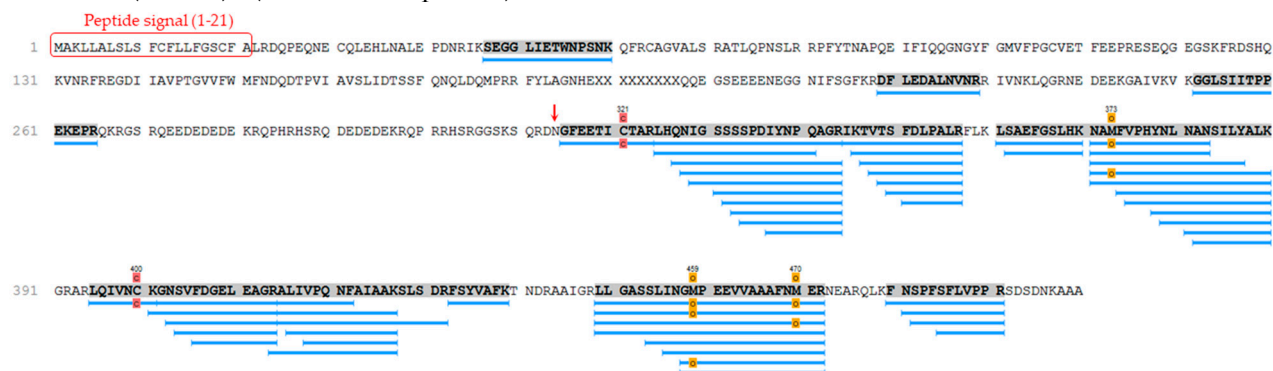

Figure S9



Legumin J Acc. No. A0A1S3E1N3 – Mass 59,6 kDa (as mature protein)

$\alpha$ -chain (trait Arg28-Asn363) – Mass 39,2 kDa

$\beta$ -chain (trait Ser364- Leu551) – Mass 20,4 kDa

Band N.11 (38 kDa)

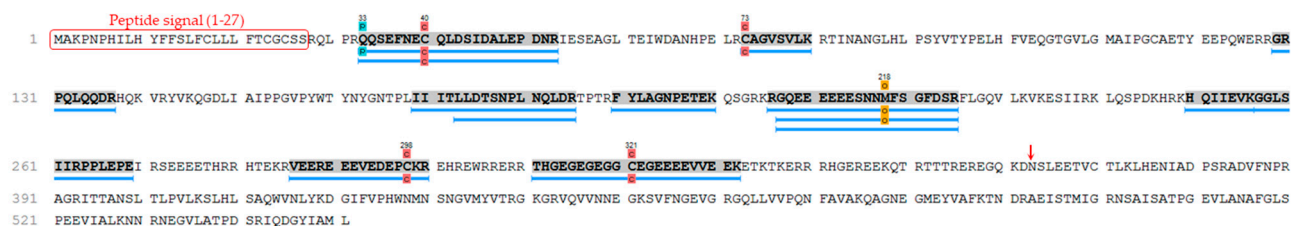

Band N.19 (20 kDa) – (as minor component)

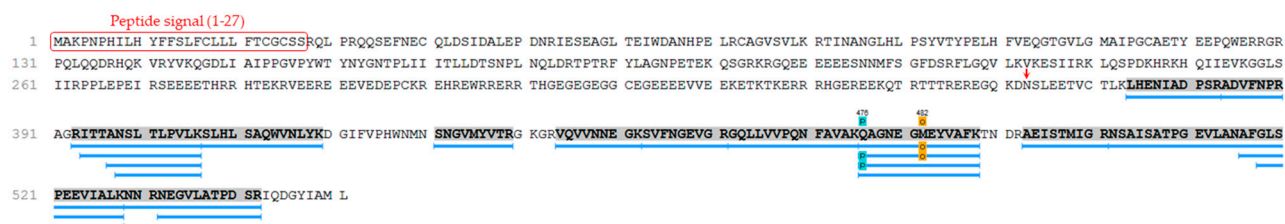

Figure S10

Legumin Acc. No. Q9SMJ4 – Mass 53,9 kDa (as mature protein)

$\alpha$ -chain (trait Leu22-Asn311) – Mass 33,3 kDa

$\beta$ -chain (trait Ser312- Glu496) – Mass 20,6 kDa

Band N.13 (34 kDa)

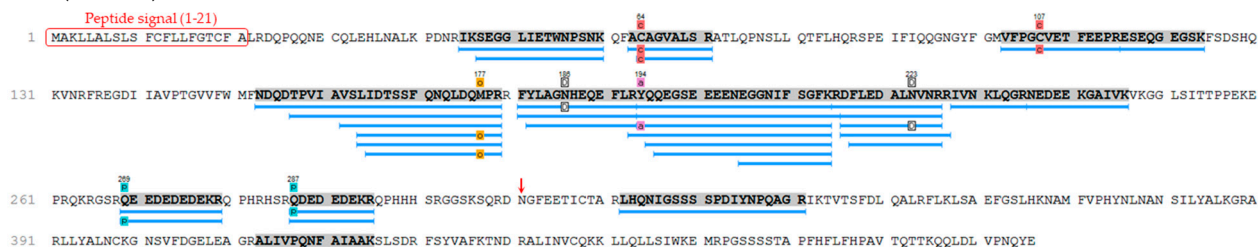

## Figure S11

Legumin J-like Acc. No. A0A1S2XVG1 – Mass 57,7 kDa (as mature protein)  
 $\alpha$ -chain (trait Thr25-Asn352) – Mass 37,7 kDa  
 $\beta$ -chain (trait Gly353- Ala532) – Mass 20,0 kDa

## Band N.10 (41 kDa)

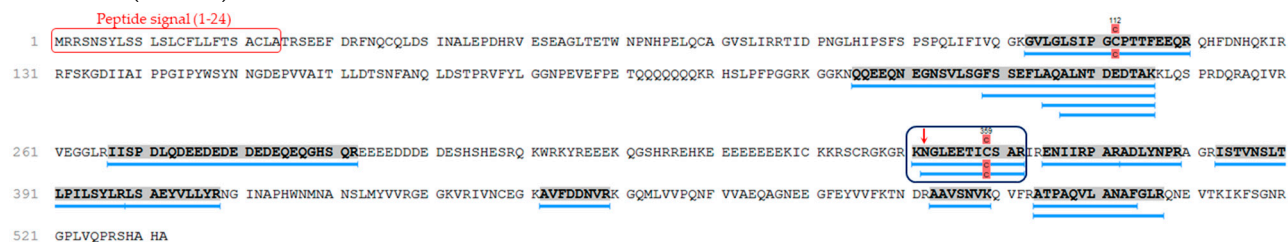

## Band N.17 (23 kDa) – (as minor component)

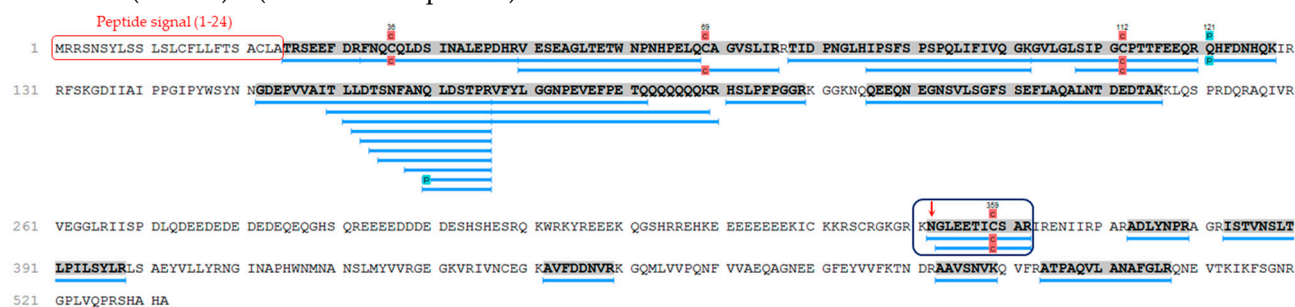

## Band N.19 (20 kDa) – (as minor component)

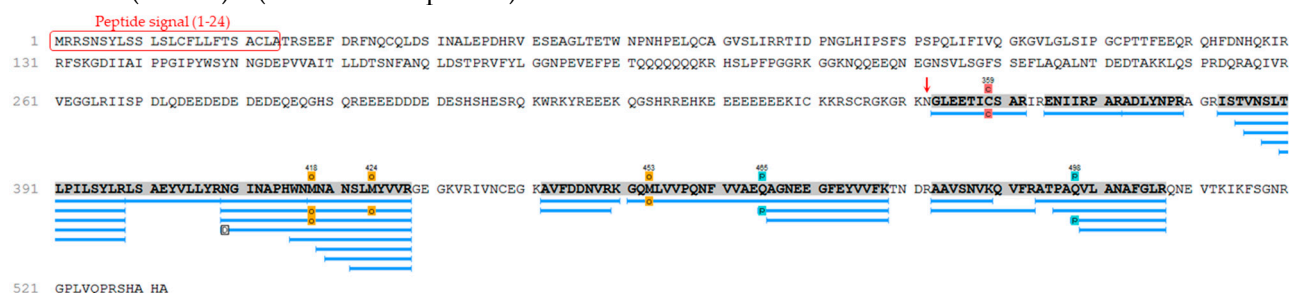

## Band N.20 (20 kDa) – (as minor component)

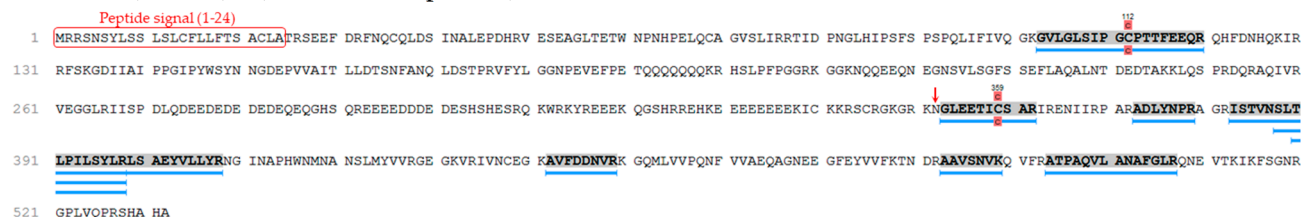

The vicilins with the Acc. Nos. Q304D4 and A0A1S2YKD9 were always identified as components in traces (relative abundance usually below 2%). Following their sequence coverage patterns.

Figure S12

Pro-Vicilin Acc. No. Q304D4– Mass 51,4 kDa  
(no information are reported for the peptide signal in the UniProtKB database)

Band N.1 (150 kDa)

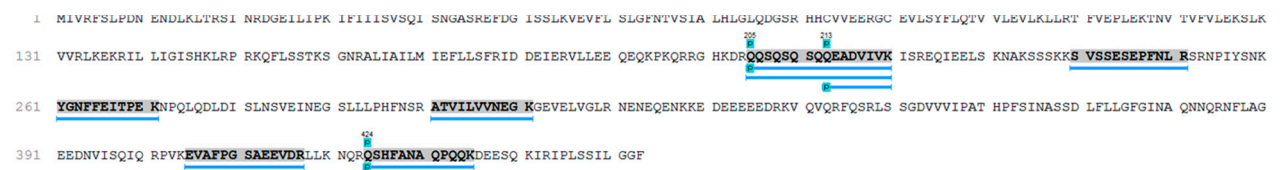

Band N.2 (100 kDa)

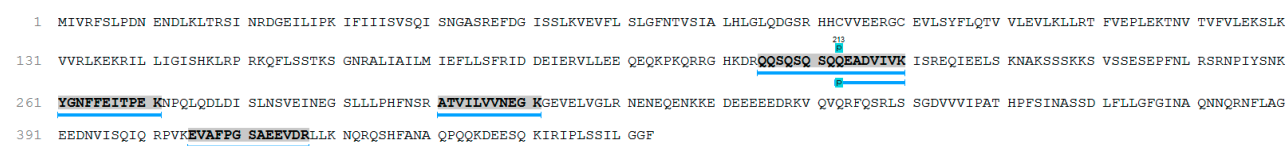

Band N.3 (90 kDa)

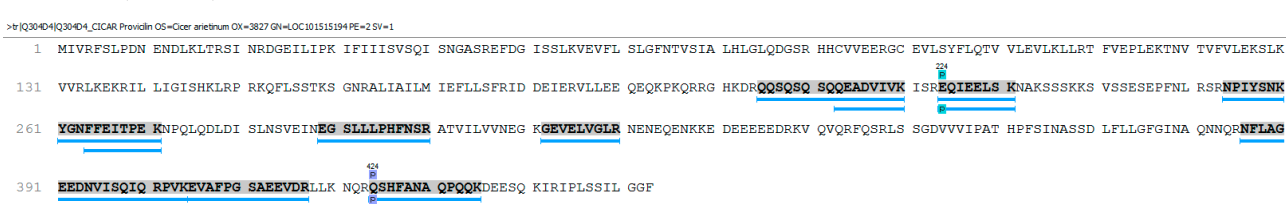

Band N.4 (70 kDa)

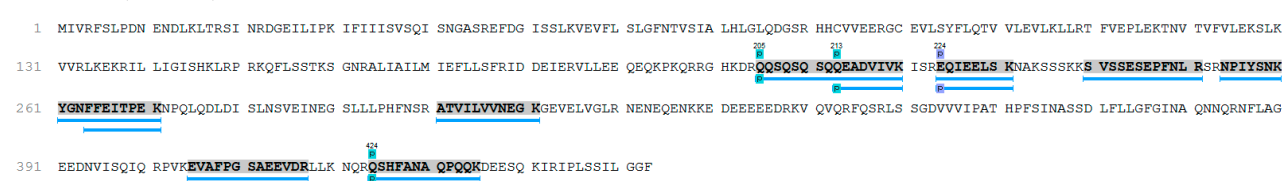

Band N.5 (65 kDa)

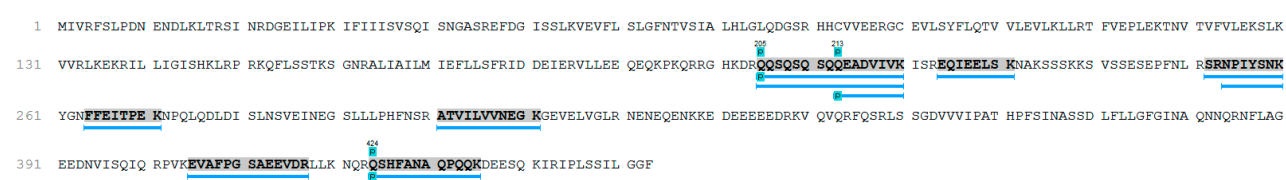

Band N.6 (60 kDa)

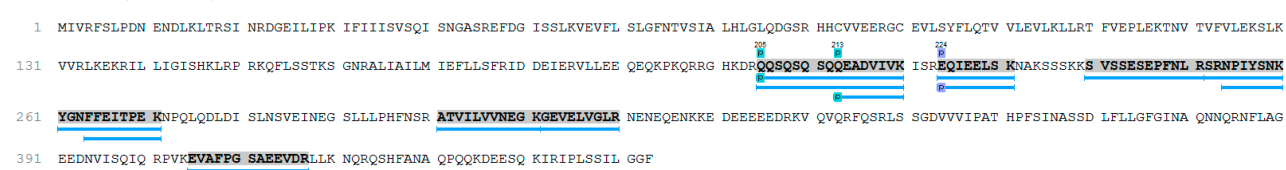

Band N.8 (47 kDa)

1 MIVRFSLPDN ENDLKLTRSI NRDGEILIPK IFIIISVSQI SNGASREFDG ISSLKVEVFL SLGFNTVSI LHLGLQDGSR HHCVVEERG EVLSYFLQTV VLEVLKLLRT FVEPLEKTNV TVFVLEKSLK

131 VVRLKEKRIL LIGISHKLRP RKQFLSSTKS GNRALIAILM IEFLLSFRID DEIERVLL EE QE QKPKQRRG HKDR QQSQSQ SQEADVIVK <sup>213</sup>ISRE<sup>224</sup>EQIEELS KNAKSSSKS VSSESEPFNL RSRNPIYSNK

261 YGNFFEITPE KNPQLQDLDI SLNSVEINEG SLLLPHFNSR ATVILVNEG KGEVELVGLR NENEQENKKE DEEEEDRKY QVQRFQSRLS SGDVVVIPAT HPFSINASSD LFLLGFGINA QNNQRNFLAG

391 EEDNVISQIQ RPKVEVAFFG SAEEDRLK <sup>424</sup>NQRQSHFANA QPQQKDEESQ KIRIPLSSIL GGF

Band N.9 (44 kDa)

1 MIVRFSLPDN ENDLKLTRSI NRDGEILIPK IFIIISVSQI SNGASREFDG ISSLKVEVFL SLGFNTVSI LHLGLQDGSR HHCVVEERG EVLSYFLQTV VLEVLKLLRT FVEPLEKTNV TVFVLEKSLK

131 VVRLKEKRIL LIGISHKLRP RKQFLSSTKS GNRALIAILM IEFLLSFRID DEIERVLL EE QE QKPKQRRG HKDR QQSQSQ SQEADVIVK <sup>213</sup>ISRE<sup>224</sup>EQIEELS KNAKSSSKS VSSESEPFNL RSRNPIYSNK

261 YGNFFEITPE KNPQLQDLDI SLNSVEINEG SLLLPHFNSR ATVILVNEG KGEVELVGLR NENEQENKKE DEEEEDRKY QVQRFQSRLS SGDVVVIPAT HPFSINASSD LFLLGFGINA QNNQRNFLAG

391 EEDNVISQIQ RPKVEVAFFG SAEEDRLK <sup>424</sup>NQRQSHFANA QPQQKDEESQ KIRIPLSSIL GGF

Band N.10 (41 kDa)

1 MIVRFSLPDN ENDLKLTRSI NRDGEILIPK IFIIISVSQI SNGASREFDG ISSLKVEVFL SLGFNTVSI LHLGLQDGSR HHCVVEERG EVLSYFLQTV VLEVLKLLRT FVEPLEKTNV TVFVLEKSLK

131 VVRLKEKRIL LIGISHKLRP RKQFLSSTKS GNRALIAILM IEFLLSFRID DEIERVLL EE QE QKPKQRRG HKDR QQSQSQ SQEADVIVK <sup>213</sup>ISRE<sup>224</sup>EQIEELS KNAKSSSKS VSSESEPFNL RSRNPIYSNK

261 YGNFFEITPE KNPQLQDLDI SLNSVEINEG EG SLLLPHFNSR ATVILVNEG KGEVELVGLR NENEQENKKE DEEEEDRKY QVQRFQSRLS SGDVVVIPAT HPFSINASSD LFLLGFGINA QNNQRNFLAG

391 EEDNVISQIQ RPKVEVAFFG SAEEDRLK <sup>424</sup>NQRQSHFANA QPQQKDEESQ KIRIPLSSIL GGF

Band N.11 (38 kDa)

1 MIVRFSLPDN ENDLKLTRSI NRDGEILIPK IFIIISVSQI SNGASREFDG ISSLKVEVFL SLGFNTVSI LHLGLQDGSR HHCVVEERG EVLSYFLQTV VLEVLKLLRT FVEPLEKTNV TVFVLEKSLK

131 VVRLKEKRIL LIGISHKLRP RKQFLSSTKS GNRALIAILM IEFLLSFRID DEIERVLL EE QE QKPKQRRG HKDR QQSQSQ SQEADVIVK <sup>213</sup>ISRE<sup>224</sup>EQIEELS KNAKSSSKS VSSESEPFNL RSRNPIYSNK

261 YGNFFEITPE KNPQLQDLDI SLNSVEINEG SLLLPHFNSR ATVILVNEG KGEVELVGLR NENEQENKKE DEEEEDRKY QVQRFQSRLS SGDVVVIPAT HPFSINASSD LFLLGFGINA QNNQRNFLAG

391 EEDNVISQIQ RPKVEVAFFG SAEEDRLK NQRQSHFANA QPQQKDEESQ KIRIPLSSIL GGF

Band N.12 (36 kDa)

1 MIVRFSLPDN ENDLKLTRSI NRDGEILIPK IFIIISVSQI SNGASREFDG ISSLKVEVFL SLGFNTVSI LHLGLQDGSR HHCVVEERG EVLSYFLQTV VLEVLKLLRT FVEPLEKTNV TVFVLEKSLK

131 VVRLKEKRIL LIGISHKLRP RKQFLSSTKS GNRALIAILM IEFLLSFRID DEIERVLL EE QE QKPKQRRG HKDR QQSQSQ SQEADVIVK <sup>213</sup>ISRE<sup>224</sup>EQIEELS KNAKSSSKS VSSESEPFNL RSRNPIYSNK

261 YGNFFEITPE KNPQLQDLDI SLNSVEINEG EG SLLLPHFNSR ATVILVNEG KGEVELVGLR NENEQENKKE DEEEEDRKY QVQRFQSRLS SGDVVVIPAT HPFSINASSD LFLLGFGINA QNNQRNFLAG

391 EEDNVISQIQ RPKVEVAFFG SAEEDRLK <sup>424</sup>NQRQSHFANA QPQQKDEESQ KIRIPLSSIL GGF

Band N.13 (34 kDa)

1 MIVRFSLPDN ENDLKLTRSI NRDGEILIPK IFIIISVSQI SNGASREFDG ISSLKVEVFL SLGFNTVSI LHLGLQDGSR HHCVVEERG EVLSYFLQTV VLEVLKLLRT FVEPLEKTNV TVFVLEKSLK

131 VVRLKEKRIL LIGISHKLRP RKQFLSSTKS GNRALIAILM IEFLLSFRID DEIERVLL EE QE QKPKQRRG HKDR QQSQSQ SQEADVIVK <sup>213</sup>ISRE<sup>224</sup>EQIEELS KNAKSSSKS VSSESEPFNL RSRNPIYSNK

261 YGNFFEITPE KNPQLQDLDI SLNSVEINEG SLLLPHFNSR ATVILVNEG KGEVELVGLR NENEQENKKE DEEEEDRKY QVQRFQSRLS SGDVVVIPAT HPFSINASSD LFLLGFGINA QNNQRNFLAG

391 EEDNVISQIQ RPKVEVAFFG SAEEDRLK <sup>424</sup>NQRQSHFANA QPQQKDEESQ KIRIPLSSIL GGF

Band N.14 (32 kDa)

1 MIVRFSLPDN ENDLKLTRSI NRDGEILIPK IFIIISVSQI SNGASREFDG ISSLKVEVFL SLGFNTVSI LHLGLQDGSR HHCVVEERG EVLSYFLQTV VLEVLKLLRT FVEPLEKTNV TVFVLEKSLK

131 VVRLKEKRIL LIGISHKLRP RKQFLSSTKS GNRALIAILM IEFLLSFRID DEIERVLL EE QE QKPKQRRG HKDR QQSQSQ SQEADVIVK <sup>213</sup>ISRE<sup>224</sup>EQIEELS KNAKSSSKS VSSESEPFNL RSRNPIYSNK

261 YGNFFEITPE KNPQLQDLDI SLNSVEINEG SLLLPHFNSR ATVILVNEG KGEVELVGLR NENEQENKKE DEEEEDRKY QVQRFQSRLS SGDVVVIPAT HPFSINASSD LFLLGFGINA QNNQRNFLAG

391 EEDNVISQIQ RPKVEVAFFG SAEEDRLK <sup>424</sup>NQRQSHFANA QPQQKDEESQ KIRIPLSSIL GGF

Band N.15 (30 kDa)

1 MIVRFSLPDN ENDLKLTRSI NRDGEILIPK IFIIISVSQI SNGASREFDG ISSLKVEVFL SLGFNTVSIA LHLGLQDGSR HHCVVEERG EVLSYFLQTV VLEVLKLLRT FVEPLEKTNV TVFVLEKSLK  
 131 VVRLKEKRIL LIGISHKLRP RKQFLSSTKS GNRALIAILM IEFLLSFRID DEIERVLEE QEQKPKQRRG HKDRQSQSQ SQEADVIVK ISREQIEELS KNAKSSSKKS VSSESEPPNL RSRNPIYSNK  
 261 YGNFFEITPE KNPQLQDLDI SLNSVEINEG SLLLPHFNSR ATVILVNEG KGEVELVGLR NENEQENKKE DEEEEDRKV QVQRFQSRLS SGD VVIPAT HPFSINASSD LFLLGFGINA QNNQRNFLAG  
 391 EEDNVISQIQ RPVK EVAFFG SAEVDRLK NQR QSHFANA QPQQK DEESQ KIRIPLSSIL GGF

### Band N.16 (24 kDa)

1 MIVRFSLPDN ENDLKLTRSI NRDGEILIPK IFIIISVSQI SNGASREFDG ISSLKVEVFL SLGFNTVSIA LHLGLQDGSR HHCVVEERG EVLSYFLQTV VLEVLKLLRT FVEPLEKTNV TVFVLEKSLK  
 131 VVRLKEKRIL LIGISHKLRP RKQFLSSTKS GNRALIAILM IEFLLSFRID DEIERVLEE QEQKPKQRRG HKDRQSQSQ SQEADVIVK ISREQIEELS KNAKSSSKKS VSSESEPPNL RSRNPIYSNK  
 261 YGNFFEITPE KNPQLQDLDI SLNSVEINEG SLLLPHFNSR ATVILVNEG KGEVELVGLR NENEQENKKE DEEEEDRKV QVQRFQSRLS SGD VVIPAT HPFSINASSD LFLLGFGINA QNNQRNFLAG  
 391 EEDNVISQIQ RPVK EVAFFG SAEVDRLK NQR QSHFANA QPQQK DEESQ KIRIPLSSIL GGF

### Band N.17 (23 kDa)

1 MIVRFSLPDN ENDLKLTRSI NRDGEILIPK IFIIISVSQI SNGASREFDG ISSLKVEVFL SLGFNTVSIA LHLGLQDGSR HHCVVEERG EVLSYFLQTV VLEVLKLLRT FVEPLEKTNV TVFVLEKSLK  
 131 VVRLKEKRIL LIGISHKLRP RKQFLSSTKS GNRALIAILM IEFLLSFRID DEIERVLEE QEQKPKQRRG HKDRQSQSQ SQEADVIVK ISREQIEELS KNAKSSSKKS VSSESEPPNL RSRNPIYSNK  
 261 YGNFFEITPE KNPQLQDLDI SLNSVEINEG SLLLPHFNSR ATVILVNEG KGEVELVGLR NENEQENKKE DEEEEDRKV QVQRFQSRLS SGD VVIPAT HPFSINASSD LFLLGFGINA QNNQRNFLAG  
 391 EEDNVISQIQ RPVK EVAFFG SAEVDRLK NQR QSHFANA QPQQK DEESQ KIRIPLSSIL GGF

### Band N.18 (22 kDa)

1 MIVRFSLPDN ENDLKLTRSI NRDGEILIPK IFIIISVSQI SNGASREFDG ISSLKVEVFL SLGFNTVSIA LHLGLQDGSR HHCVVEERG EVLSYFLQTV VLEVLKLLRT FVEPLEKTNV TVFVLEKSLK  
 131 VVRLKEKRIL LIGISHKLRP RKQFLSSTKS GNRALIAILM IEFLLSFRID DEIERVLEE QEQKPKQRRG HKDRQSQSQ SQEADVIVK ISREQIEELS KNAKSSSKKS VSSESEPPNL RSRNPIYSNK  
 261 YGNFFEITPE KNPQLQDLDI SLNSVEINEG SLLLPHFNSR ATVILVNEG KGEVELVGLR NENEQENKKE DEEEEDRKV QVQRFQSRLS SGD VVIPAT HPFSINASSD LFLLGFGINA QNNQRNFLAG  
 391 EEDNVISQIQ RPVK EVAFFG SAEVDRLK NQR QSHFANA QPQQK DEESQ KIRIPLSSIL GGF

### Band N.19 (20 kDa)

1 MIVRFSLPDN ENDLKLTRSI NRDGEILIPK IFIIISVSQI SNGASREFDG ISSLKVEVFL SLGFNTVSIA LHLGLQDGSR HHCVVEERG EVLSYFLQTV VLEVLKLLRT FVEPLEKTNV TVFVLEKSLK  
 131 VVRLKEKRIL LIGISHKLRP RKQFLSSTKS GNRALIAILM IEFLLSFRID DEIERVLEE QEQKPKQRRG HKDRQSQSQ SQEADVIVK ISREQIEELS KNAKSSSKKS VSSESEPPNL RSRNPIYSNK  
 261 YGNFFEITPE KNPQLQDLDI SLNSVEINEG SLLLPHFNSR ATVILVNEG KGEVELVGLR NENEQENKKE DEEEEDRKV QVQRFQSRLS SGD VVIPAT HPFSINASSD LFLLGFGINA QNNQRNFLAG  
 391 EEDNVISQIQ RPVK EVAFFG SAEVDRLK NQR QSHFANA QPQQK DEESQ KIRIPLSSIL GGF

### Band N.20 (20 kDa)

1 MIVRFSLPDN ENDLKLTRSI NRDGEILIPK IFIIISVSQI SNGASREFDG ISSLKVEVFL SLGFNTVSIA LHLGLQDGSR HHCVVEERG EVLSYFLQTV VLEVLKLLRT FVEPLEKTNV TVFVLEKSLK  
 131 VVRLKEKRIL LIGISHKLRP RKQFLSSTKS GNRALIAILM IEFLLSFRID DEIERVLEE QEQKPKQRRG HKDRQSQSQ SQEADVIVK ISREQIEELS KNAKSSSKKS VSSESEPPNL RSRNPIYSNK  
 261 YGNFFEITPE KNPQLQDLDI SLNSVEINEG SLLLPHFNSR ATVILVNEG KGEVELVGLR NENEQENKKE DEEEEDRKV QVQRFQSRLS SGD VVIPAT HPFSINASSD LFLLGFGINA QNNQRNFLAG  
 391 EEDNVISQIQ RPVK EVAFFG SAEVDRLK NQR QSHFANA QPQQK DEESQ KIRIPLSSIL GGF

Figure S13

Vicilin Acc. No. A0A1S2YKD9 – Mass 50,9 kDa (as mature protein)



Band N.16 (24 kDa)

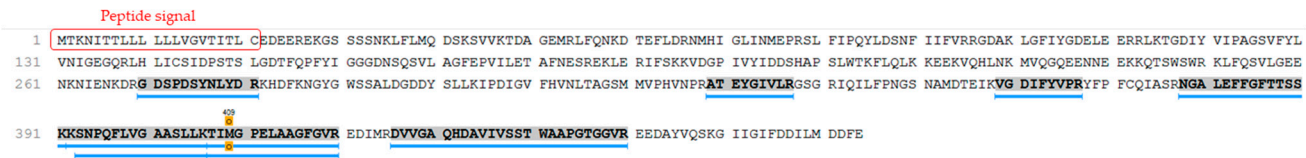

Band N.17 (23 kDa)

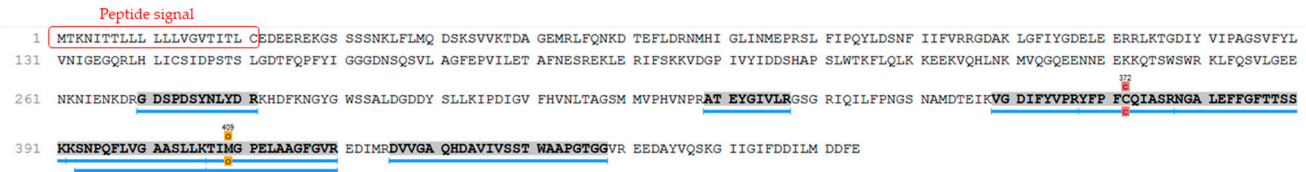

Band N.18 (22 kDa)

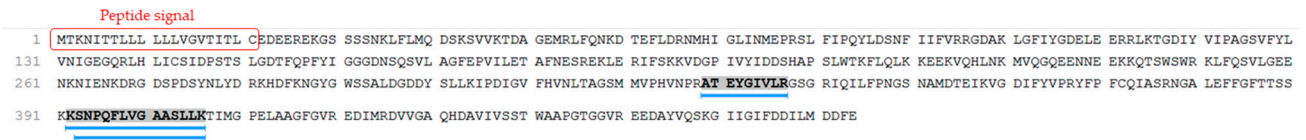

Band N.19 (20 kDa)

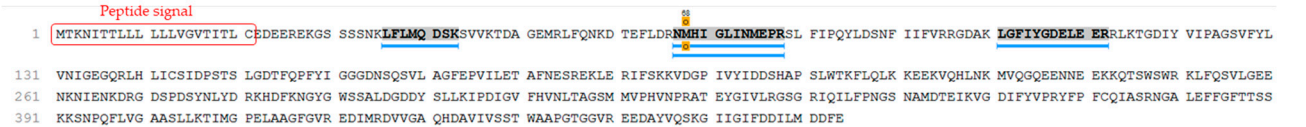

Supplement: s1 [file s1]
