# Supplementary material for: Mass Spectrometry Characterization of the SDS-PAGE Protein Profile of Legumins and Vicilins from Chickpea Seed
Source: Foods. 2024 Mar 14;13(6):887. doi: 10.3390/foods13060887 (PMC10969193; doi:10.3390/foods13060887)
Supplement: Supplementary file 1 [file foods-13-00887-s001.zip › Table S1.xlsx]

## Sheet: 1
Protein Group	Protein ID	Accession	-10lgP2	Coverage (%)	Coverage (%) Sample 1	Area Sample	#Peptides	#Unique	#Spec Sample 1	PTM	Avg. Mass	Description	Relative Abundance
1	5	A0A1S2Z626|A0A1S2Z626_CICAR	289.41	28	28	456650000	21	21	27	Oxidation (M); Pyro-glu from E	101924	LIM domain-containing protein A-like isoform X1 OS=Cicer arietinum OX=3827 GN=LOC101511316 PE=4 SV=1	78.1183
9	11	A0A1S2XQR4|A0A1S2XQR4_CICAR	203.2	24	24	1216900	10	1	12	Pyro-glu from Q	51839	vicilin-like OS=Cicer arietinum OX=3827 GN=LOC101515515 PE=4 SV=1	0.208173
10	12	A0A1S2XQ88|A0A1S2XQ88_CICAR	195.9	19	19	2139300	8	1	10	Pyro-glu from Q	51087	vicilin-like OS=Cicer arietinum OX=3827 GN=LOC101505411 PE=4 SV=1	0.365966
11	16	Q304D4|Q304D4_CICAR	184.89	17	17	37800	7	1	10	Pyro-glu from Q	51421	Provicilin OS=Cicer arietinum OX=3827 GN=LOC101515194 PE=2 SV=1	0.00646638
20	21	sp|Q9SMJ4|LEG_CICAR	168.56	16	16	2293400	5	1	5	Carbamidomethylation	56251	Legumin OS=Cicer arietinum OX=3827 GN=leg3 PE=1 SV=1	0.392328
26	33	A0A1S2XVM2|A0A1S2XVM2_CICAR	112.36	15	15	7702600	3	3	3	Carbamidomethylation	35512	NADPH-dependent aldehyde reductase 1 chloroplastic-like OS=Cicer arietinum OX=3827 GN=LOC101506833 PE=4 SV=1	1.31767
22	23	A0A1S2XSB9|A0A1S2XSB9_CICAR	158.3	13	13	11888000	5	3	6	Carbamidomethylation	59343	legumin A-like OS=Cicer arietinum OX=3827 GN=LOC101489278 PE=3 SV=1	2.03366
46	263	A0A1S2Y8R4|A0A1S2Y8R4_CICAR	53.02	13	13	588010	1	1	1		16143	Oleosin OS=Cicer arietinum OX=3827 GN=LOC101488878 PE=3 SV=1	0.10059
6	9	A0A1S2YJU0|A0A1S2YJU0_CICAR	220.7	12	12	23615000	13	13	13	Oxidation (M); Acetylation (Protein N-term)	153114	myosin-9 isoform X2 OS=Cicer arietinum OX=3827 GN=LOC101513296 PE=4 SV=1	4.03977
25	31	A0A1S2XV08|A0A1S2XV08_CICAR	119.49	12	12	1539500	3	3	3	Carbamidomethylation; Pyro-glu from Q	48256	basic 7S globulin-like OS=Cicer arietinum OX=3827 GN=LOC101504144 PE=3 SV=1	0.263359
12	8	A0A3Q7YAD4|A0A3Q7YAD4_CICAR	190.13	11	11	23757000	8	6	9	Oxidation (M); Acetylation (Protein N-term)	96937	Lipoxygenase OS=Cicer arietinum OX=3827 GN=LOC101491605 PE=3 SV=1	4.06407
21	22	A0A1S2Y087|A0A1S2Y087_CICAR	155.84	11	11	17907000	5	4	5		69392	vicilin-like OS=Cicer arietinum OX=3827 GN=LOC101510695 PE=4 SV=1	3.06332
35	43	A0A1S2Y2Z0|A0A1S2Y2Z0_CICAR	95.48	11	11	5494600	2	2	2		29052	Thioredoxin-dependent peroxiredoxin OS=Cicer arietinum OX=3827 GN=LOC101510264 PE=4 SV=1	0.939951
5	7	A0A1S2XL88|A0A1S2XL88_CICAR	224.76	10	10	9402600	13	3	13	Oxidation (M)	192884	Clathrin heavy chain OS=Cicer arietinum OX=3827 GN=LOC101514746 PE=3 SV=1	1.60849
8	13	A0A1S2Y8W1|A0A1S2Y8W1_CICAR	207.63	9	9	2686500	12	2	12	Oxidation (M)	193064	Clathrin heavy chain OS=Cicer arietinum OX=3827 GN=LOC101502662 PE=3 SV=1	0.459575
27	27	A0A1S2XYZ0|A0A1S2XYZ0_CICAR	135.61	7	7	6385900	3	3	3	Pyro-glu from Q	64651	provicilin-like OS=Cicer arietinum OX=3827 GN=LOC101510367 PE=4 SV=1	1.09242
38	80	A0A1S2XJM3|A0A1S2XJM3_CICAR	52.23	7	7	0	1	1	2		20683	P24 oleosin OS=Cicer arietinum OX=3827 GN=LOC101509783 PE=3 SV=1	0
15	15	A0A1S2XBN2|A0A1S2XBN2_CICAR	171.98	6	6	10321000	5	3	5	Oxidation (M); Acetylation (Protein N-term)	97493	Lipoxygenase OS=Cicer arietinum OX=3827 GN=LOC101491283 PE=3 SV=1	1.76559
44	267	A0A1S2XWZ2|A0A1S2XWZ2_CICAR	59.03	6	6	23467	1	1	1		26936	late embryogenesis abundant protein D-34 isoform X2 OS=Cicer arietinum OX=3827 GN=LOC101490476 PE=3 SV=1	0.00401446
13	17	A0A1S2YTB3|A0A1S2YTB3_CICAR	189.94	5	5	913700	5	5	5	Pyro-glu from Q	165148	alpha-glucan water dikinase chloroplastic isoform X2 OS=Cicer arietinum OX=3827 GN=LOC101506240 PE=3 SV=1	0.156305
45	182	A0A1S2Z7Q4|A0A1S2Z7Q4_CICAR	#REF!	4	4		1	1	1		41368	tripeptidyl-peptidase 2-like isoform X4 OS=Cicer arietinum OX=3827 GN=LOC101503191 PE=4 SV=1
45	183	A0A1S2Z7R7|A0A1S2Z7R7_CICAR	#REF!	4	4		1	1	1		42611	tripeptidyl-peptidase 2-like isoform X3 OS=Cicer arietinum OX=3827 GN=LOC101503191 PE=4 SV=1
45	184	A0A1S2Z7Q1|A0A1S2Z7Q1_CICAR	#REF!	4	4		1	1	1		43734	tripeptidyl-peptidase 2-like isoform X2 OS=Cicer arietinum OX=3827 GN=LOC101503191 PE=4 SV=1
45	185	A0A1S2Z7Q8|A0A1S2Z7Q8_CICAR	#REF!	4	4		1	1	1		43856	tripeptidyl-peptidase 2-like isoform X1 OS=Cicer arietinum OX=3827 GN=LOC101503191 PE=4 SV=1
33	72	A0A1S2XVJ8|A0A1S2XVJ8_CICAR	#REF!	3	3		1	1	1		53803	sucrose-binding protein-like OS=Cicer arietinum OX=3827 GN=LOC101499776 PE=4 SV=1
31	39	A0A1S2XET4|A0A1S2XET4_CICAR	#REF!	2	2		1	1	1		71295	seed biotin-containing protein SBP65 OS=Cicer arietinum OX=3827 GN=LOC101504303 PE=4 SV=1

## Sheet: 2
Protein Group	Protein ID	Accession	Colonna1	Coverage (%)	Coverage (%) Sample 1	Area Sample	#Peptides	#Unique	#Spec Sample 1	PTM	Avg. Mass	Description	Relative Abundance
1	1	A0A1S2XHJ1|A0A1S2XHJ1_CICAR	341.51	41	41	582200000	37	30	55	Carbamidomethylation; Oxidation (M); Pyro-glu from Q	111311	Alpha-1 4 glucan phosphorylase OS=Cicer arietinum OX=3827 GN=LOC101506144 PE=3 SV=1	12.7183
4	5	A0A1S2YD23|A0A1S2YD23_CICAR	272.17	29	29	104640000	23	23	25	Oxidation (M); Acetylation (Protein N-term)	108276	Ribonuclease OS=Cicer arietinum OX=3827 GN=LOC101488993 PE=4 SV=1	22.8588
8	7	A0A3Q7YAD4|A0A3Q7YAD4_CICAR	234.16	18	18	40633000	13	9	17	Oxidation (M); Pyro-glu from Q; Acetylation (Protein N-term)	96937	Lipoxygenase OS=Cicer arietinum OX=3827 GN=LOC101491605 PE=3 SV=1	8.87635
7	12	A0A1S2XBN2|A0A1S2XBN2_CICAR	218.13	16	16	58288000	13	9	17	Oxidation (M); Pyro-glu from Q; Acetylation (Protein N-term)	97493	Lipoxygenase OS=Cicer arietinum OX=3827 GN=LOC101491283 PE=3 SV=1	12.7331
18	16	A0A1S2Y087|A0A1S2Y087_CICAR	173.14	20	20	27861000	9	8	9	Pyro-glu from Q	69392	vicilin-like OS=Cicer arietinum OX=3827 GN=LOC101510695 PE=4 SV=1	6.08629
15	15	A0A1S2YZ27|A0A1S2YZ27_CICAR	192.71	11	11	28916000	8	6	13	Oxidation (M)	98579	Aconitate hydratase OS=Cicer arietinum OX=3827 GN=LOC101515627 PE=3 SV=1	6.31675
17	25	A0A1S2YIQ1|A0A1S2YIQ1_CICAR	154.75	9	9	28896000	8	1	10	Carbamidomethylation; Pyro-glu from Q	111513	Alpha-1 4 glucan phosphorylase OS=Cicer arietinum OX=3827 GN=LOC101492670 PE=3 SV=1	6.31238
19	19	A0A1S2XSV9|A0A1S2XSV9_CICAR	168.01	11	11	10347000	7	7	7	Carbamidomethylation	89743	cell division control protein 48 homolog D OS=Cicer arietinum OX=3827 GN=LOC101499662 PE=4 SV=1	2.26032
21	17	A0A1S2XSB9|A0A1S2XSB9_CICAR	163.86	17	17	19965000	7	4	8		59343	legumin A-like OS=Cicer arietinum OX=3827 GN=LOC101489278 PE=3 SV=1	4.36139
22	24	sp|Q9SMJ4|LEG_CICAR	163.37	20	20	2753500	7	1	8		56251	Legumin OS=Cicer arietinum OX=3827 GN=leg3 PE=1 SV=1	0.601507
25	31	A0A1S2XV08|A0A1S2XV08_CICAR	142.15	22	22	4960600	7	7	8	Carbamidomethylation	48256	basic 7S globulin-like OS=Cicer arietinum OX=3827 GN=LOC101504144 PE=3 SV=1	1.08365
30	29	A0A1S2YKV2|A0A1S2YKV2_CICAR	155.43	11	11	4034100	6	6	6	Carbamidomethylation	91735	Poly [ADP-ribose] polymerase OS=Cicer arietinum OX=3827 GN=LOC101514608 PE=4 SV=1	0.881256
28	30	A0A1S2X990|A0A1S2X990_CICAR	149.06	8	8	765800	6	6	6		105331	Eukaryotic translation initiation factor 3 subunit C OS=Cicer arietinum OX=3827 GN=LOC101499912 PE=3 SV=1	0.16729
24	28	A0A1S2XQR4|A0A1S2XQR4_CICAR	148.27	15	15	0	6	1	7	Pyro-glu from Q	51839	vicilin-like OS=Cicer arietinum OX=3827 GN=LOC101515515 PE=4 SV=1	0
31	26	A0A1S2XVM2|A0A1S2XVM2_CICAR	162.63	20	20	52109000	5	5	5	Carbamidomethylation; Oxidation (M)	35512	NADPH-dependent aldehyde reductase 1 chloroplastic-like OS=Cicer arietinum OX=3827 GN=LOC101506833 PE=4 SV=1	11.3833
29	37	Q304D4|Q304D4_CICAR	146.26	11	11	928470	5	1	6	Pyro-glu from Q	51421	Provicilin OS=Cicer arietinum OX=3827 GN=LOC101515194 PE=2 SV=1	0.202826
33	40	A0A3Q7K771|A0A3Q7K771_CICAR	128.98	18	18	8370200	4	4	4		26148	albumin-2-like OS=Cicer arietinum OX=3827 GN=LOC101512722 PE=4 SV=1	1.82849
41	61	A0A1S2XVJ8|A0A1S2XVJ8_CICAR	99.18	5	5	3454600	2	2	2		53803	sucrose-binding protein-like OS=Cicer arietinum OX=3827 GN=LOC101499776 PE=4 SV=1	0.754664
50	97	A0A1S2YP37|A0A1S2YP37_CICAR	78.56	5	5	361230	2	2	2		71210	heat shock 70 kDa protein OS=Cicer arietinum OX=3827 GN=LOC101492688 PE=3 SV=1	0.0789113
51	171	O81921|O81921_CICAR	74.72	5	5	1668600	2	2	2	Pyro-glu from Q	35638	Elongation factor 1-alpha (EF1-a) (Fragment) OS=Cicer arietinum OX=3827 PE=2 SV=1	0.364509
46	75	A0A1S2Y5N0|A0A1S2Y5N0_CICAR	59.28	5	5	594820	2	2	2	Pyro-glu from Q	67281	far upstream element-binding protein 1-like OS=Cicer arietinum OX=3827 GN=LOC101512639 PE=4 SV=1	0.129939

## Sheet: 3
Protein Group	Protein ID	Accession	Score	Coverage (%)	Coverage (%) Sample 1	Area Sample	#Peptides	#Unique	#Spec Sample 1	PTM	Avg. Mass	Description	Relative Abundance
1	5	A0A1S2XBN2|A0A1S2XBN2_CICAR	369.2	48	48	2323200000	43	31	94	Carbamidomethylation; Oxidation (M); Pyro-glu from E; Pyro-glu from Q; Acetylation (Protein N-term)	97493	Lipoxygenase OS=Cicer arietinum OX=3827 GN=LOC101491283 PE=3 SV=1	48.0901
2	1	A0A3Q7YAD4|A0A3Q7YAD4_CICAR	363.07	46	46	1349800000	36	25	62	Carbamidomethylation; Oxidation (M); Pyro-glu from E; Pyro-glu from Q; Acetylation (Protein N-term)	96937	Lipoxygenase OS=Cicer arietinum OX=3827 GN=LOC101491605 PE=3 SV=1	27.9408
10	10	A0A1S2XQR4|A0A1S2XQR4_CICAR	241.59	40	40	2439000	17	2	19	Pyro-glu from E; Pyro-glu from Q	51839	vicilin-like OS=Cicer arietinum OX=3827 GN=LOC101515515 PE=4 SV=1	0.0504872
9	11	A0A1S2XET4|A0A1S2XET4_CICAR	252.05	31	31	10990000	16	16	18	Oxidation (M)	71295	seed biotin-containing protein SBP65 OS=Cicer arietinum OX=3827 GN=LOC101504303 PE=4 SV=1	0.227492
13	9	A0A1S2XQ88|A0A1S2XQ88_CICAR	238.89	39	39	10847000	16	4	18	Pyro-glu from E; Pyro-glu from Q	51087	vicilin-like OS=Cicer arietinum OX=3827 GN=LOC101505411 PE=4 SV=1	0.224532
8	4	A0A1S2XSB9|A0A1S2XSB9_CICAR	286.1	40	40	157820000	15	12	18	Carbamidomethylation; Pyro-glu from Q	59343	legumin A-like OS=Cicer arietinum OX=3827 GN=LOC101489278 PE=3 SV=1	3.26687
6	8	A0A1S2Y087|A0A1S2Y087_CICAR	242.85	30	30	168720000	15	11	21	Pyro-glu from E; Pyro-glu from Q	69392	vicilin-like OS=Cicer arietinum OX=3827 GN=LOC101510695 PE=4 SV=1	3.49249
11	12	A0A3Q7XNW1|A0A3Q7XNW1_CICAR	241.91	34	34	81581000	12	5	16	Carbamidomethylation; Oxidation (M); Pyro-glu from Q	56342	legumin-like OS=Cicer arietinum OX=3827 GN=LEG PE=3 SV=1	1.68872
20	18	Q304D4|Q304D4_CICAR	208.84	24	24	4289300	11	1	13	Pyro-glu from E; Pyro-glu from Q	51421	Provicilin OS=Cicer arietinum OX=3827 GN=LOC101515194 PE=2 SV=1	0.0887883
15	24	A0A1S2Y9D8|A0A1S2Y9D8_CICAR	206.21	16	16	59402000	11	11	11	Carbamidomethylation; Oxidation (M); Pyro-glu from Q	98708	Aminopeptidase OS=Cicer arietinum OX=3827 GN=LOC101506534 PE=3 SV=1	1.22962
14	16	A0A1S2XYZ0|A0A1S2XYZ0_CICAR	199.23	23	23	59854000	11	9	13	Oxidation (M); Pyro-glu from E; Pyro-glu from Q	64651	provicilin-like OS=Cicer arietinum OX=3827 GN=LOC101510367 PE=4 SV=1	1.23897
25	22	A0A1S2XIS4|A0A1S2XIS4_CICAR	187.26	16	16	344000	11	11	13	Carbamidomethylation	94109	elongation factor 2 OS=Cicer arietinum OX=3827 GN=LOC101493895 PE=3 SV=1	0.00712078
27	23	A0A1S2XVM2|A0A1S2XVM2_CICAR	203.04	38	38	125280000	9	9	10	Carbamidomethylation; Oxidation (M)	35512	NADPH-dependent aldehyde reductase 1 chloroplastic-like OS=Cicer arietinum OX=3827 GN=LOC101506833 PE=4 SV=1	2.59329
28	27	sp|Q9SMJ4|LEG_CICAR	219.27	20	20	22187000	7	1	10	Pyro-glu from Q	56251	Legumin OS=Cicer arietinum OX=3827 GN=leg3 PE=1 SV=1	0.45927
21	26	A0A1S2XV08|A0A1S2XV08_CICAR	188.56	22	22	19409000	6	6	9	Carbamidomethylation; Oxidation (M); Pyro-glu from Q	48256	basic 7S globulin-like OS=Cicer arietinum OX=3827 GN=LOC101504144 PE=3 SV=1	0.401765
34	30	sp|O49817|LEA2_CICAR	139.44	40	40	12536000	6	6	8	Oxidation (M)	16741	Late embryogenesis abundant protein 2 OS=Cicer arietinum OX=3827 PE=2 SV=1	0.259495
38	37	A0A1S2XVJ8|A0A1S2XVJ8_CICAR	138.51	14	14	68551000	6	6	6		53803	sucrose-binding protein-like OS=Cicer arietinum OX=3827 GN=LOC101499776 PE=4 SV=1	1.419
39	36	A0A3Q7K771|A0A3Q7K771_CICAR	127.41	30	30	97796000	6	6	6		26148	albumin-2-like OS=Cicer arietinum OX=3827 GN=LOC101512722 PE=4 SV=1	2.02437
37	33	A0A1S2YKV2|A0A1S2YKV2_CICAR	162.86	9	9	3216200	5	5	5	Carbamidomethylation	91735	Poly [ADP-ribose] polymerase OS=Cicer arietinum OX=3827 GN=LOC101514608 PE=4 SV=1	0.0665752
31	32	A0A1S2YZ56|A0A1S2YZ56_CICAR	155	9	9	18069000	5	5	5	Carbamidomethylation	81876	vicilin-like seed storage protein At2g18540 OS=Cicer arietinum OX=3827 GN=LOC101506263 PE=4 SV=2	0.374027
41	44	A0A1S2XVG1|A0A1S2XVG1_CICAR	174.62	12	12	30909000	4	4	5		60371	legumin J-like OS=Cicer arietinum OX=3827 GN=LOC101501269 PE=3 SV=1	0.639815
30	34	A0A1S2YPX2|A0A1S2YPX2_CICAR	155.66	10	10	12529000	4	4	6		45826	embryonic protein DC-8-like OS=Cicer arietinum OX=3827 GN=LOC101509550 PE=4 SV=1	0.25935
50	50	A0A1S2XSP2|A0A1S2XSP2_CICAR	122.95	22	22	24621000	4	4	4	Pyro-glu from Q	21418	P24 oleosin-like OS=Cicer arietinum OX=3827 GN=LOC101492171 PE=3 SV=1	0.509653
51	40	A0A1S2XED8|A0A1S2XED8_CICAR	119.67	8	8	9109700	4	4	4	Pyro-glu from Q	92140	Phospholipase D OS=Cicer arietinum OX=3827 GN=LOC101513726 PE=3 SV=1	0.18857
49	59	A0A1S2XYX3|A0A1S2XYX3_CICAR	141.1	16	16	1031000	3	3	4	Carbamidomethylation	26538	late embryogenesis abundant protein D-34-like OS=Cicer arietinum OX=3827 GN=LOC101515330 PE=3 SV=1	0.0213416
65	53	A0A1S2YGY5|A0A1S2YGY5_CICAR	124.19	23	23	9349100	3	3	3	Oxidation (M); Pyro-glu from Q	24364	Peroxiredoxin OS=Cicer arietinum OX=3827 GN=LOC101507526 PE=3 SV=1	0.193526
52	68	sp|O65735|ALF_CICAR	123.61	13	13	2626700	3	3	3		38452	Fructose-bisphosphate aldolase cytoplasmic isozyme OS=Cicer arietinum OX=3827 GN=ALDC PE=2 SV=1	0.0543725
40	41	A0A1S3E1N3|A0A1S3E1N3_CICAR	121.46	6	6	23894000	3	3	4		62715	legumin J OS=Cicer arietinum OX=3827 GN=LOC101489055 PE=3 SV=1	0.494605
66	52	A0A1S2YP40|A0A1S2YP40_CICAR	117.96	15	15	9374100	3	3	3		31937	NADPH-dependent aldehyde reductase 1 chloroplastic-like OS=Cicer arietinum OX=3827 GN=LOC101505375 PE=4 SV=1	0.194043
57	54	A0A1S2YP37|A0A1S2YP37_CICAR	117.34	6	6	7074500	3	3	3		71210	heat shock 70 kDa protein OS=Cicer arietinum OX=3827 GN=LOC101492688 PE=3 SV=1	0.146442
46	49	A0A1S2YNP0|A0A1S2YNP0_CICAR	111.52	5	5	192200	3	3	3		105762	Coatomer subunit beta OS=Cicer arietinum OX=3827 GN=LOC101503982 PE=4 SV=1	0.00397853
54	61	A0A1S3DYQ2|A0A1S3DYQ2_CICAR	99.78	28	28	3619600	3	3	4		18868	late embryogenesis abundant protein D-34-like isoform X2 OS=Cicer arietinum OX=3827 GN=LOC101495601 PE=3 SV=1	0.0749255
68	72	A0A1S2XHQ9|A0A1S2XHQ9_CICAR	93.85	10	10	114000	3	3	3	Pyro-glu from Q	49330	Elongation factor 1-alpha OS=Cicer arietinum OX=3827 GN=LOC101515489 PE=3 SV=1	0.00235979
70	76	A0A1S2YBD0|A0A1S2YBD0_CICAR	87.82	18	18	2142500	3	3	3		37021	Glyceraldehyde-3-phosphate dehydrogenase OS=Cicer arietinum OX=3827 GN=LOC101491257 PE=3 SV=1	0.0443496
58	118	A0A1S2Y8R4|A0A1S2Y8R4_CICAR	97.08	19	19	17033000	2	2	3		16143	Oleosin OS=Cicer arietinum OX=3827 GN=LOC101488878 PE=3 SV=1	0.352582
63	93	E5DCK1|E5DCK1_CICAR	89.59	8	8	3998200	2	2	2		41682	Actin OS=Cicer arietinum OX=3827 GN=LOC101503086 PE=2 SV=1	0.0827625
59	169	A0A1S2XDF0|A0A1S2XDF0_CICAR	87.26	10	10	74202000	2	2	3		17099	2S albumin-like OS=Cicer arietinum OX=3827 GN=LOC101510519 PE=3 SV=1	1.53598
75	134	A0A1S2XWZ2|A0A1S2XWZ2_CICAR	67.18	12	12	2780300	2	2	2		26936	late embryogenesis abundant protein D-34 isoform X2 OS=Cicer arietinum OX=3827 GN=LOC101490476 PE=3 SV=1	0.0575521

## Sheet: 4
Protein Group	Protein ID	Accession	Score	Coverage (%)	Coverage (%) Sample 1	Area Sample	#Peptides	#Unique	#Spec Sample 1	PTM	Avg. Mass	Description	Relative Abundance
1	1	A0A1S2XET4|A0A1S2XET4_CICAR	398.02	64	64	4833300000	62	62	132	Carbamidomethylation; Oxidation (M); Pyro-glu from E; Pyro-glu from Q; Acetylation (Protein N-term); Mutation	71295	seed biotin-containing protein SBP65 OS=Cicer arietinum OX=3827 GN=LOC101504303 PE=4 SV=1	77.4255
2	2	A0A1S2YP37|A0A1S2YP37_CICAR	334.64	64	64	646170000	41	20	72	Carbamidomethylation; Oxidation (M); Pyro-glu from E; Pyro-glu from Q	71210	heat shock 70 kDa protein OS=Cicer arietinum OX=3827 GN=LOC101492688 PE=3 SV=1	10.3511
5	9	A0A3Q7XXP6|A0A3Q7XXP6_CICAR	273.17	23	23	2849100	23	1	37	Carbamidomethylation; Oxidation (M)	106304	LOW QUALITY PROTEIN: heat shock cognate 70 kDa protein 2 OS=Cicer arietinum OX=3827 GN=LOC101501450 PE=4 SV=1	0.0456402
3	4	A0A1S2YEC8|A0A1S2YEC8_CICAR	270.85	43	43	20257000	27	4	38	Carbamidomethylation; Oxidation (M)	73532	luminal-binding protein OS=Cicer arietinum OX=3827 GN=LOC101513614 PE=3 SV=1	0.324501
4	7	A0A1S2YEC3|A0A1S2YEC3_CICAR	262.97	40	40	3374300	25	2	35	Carbamidomethylation; Oxidation (M)	73558	luminal-binding protein OS=Cicer arietinum OX=3827 GN=LOC101512653 PE=3 SV=1	0.0540535
10	10	A0A3Q7YAD4|A0A3Q7YAD4_CICAR	253.06	24	24	117440000	17	12	25	Carbamidomethylation; Oxidation (M); Pyro-glu from Q	96937	Lipoxygenase OS=Cicer arietinum OX=3827 GN=LOC101491605 PE=3 SV=1	1.88129
14	6	A0A1S2Y7Y8|A0A1S2Y7Y8_CICAR	251.99	35	35	76493000	19	19	25	Carbamidomethylation; Pyro-glu from Q	80687	dipeptidyl-peptidase 5 isoform X2 OS=Cicer arietinum OX=3827 GN=LOC101508559 PE=4 SV=1	1.22536
12	11	A0A1S2Y087|A0A1S2Y087_CICAR	248.61	31	31	185180000	18	14	25	Pyro-glu from E	69392	vicilin-like OS=Cicer arietinum OX=3827 GN=LOC101510695 PE=4 SV=1	2.96643
16	18	A0A1S2XSB9|A0A1S2XSB9_CICAR	215	32	32	33475000	14	8	16	Carbamidomethylation; Pyro-glu from Q	59343	legumin A-like OS=Cicer arietinum OX=3827 GN=LOC101489278 PE=3 SV=1	0.536242
30	29	A0A1S2XPL0|A0A1S2XPL0_CICAR	198.52	14	14	4448200	10	3	11	Oxidation (M)	80238	heat shock cognate protein 80 OS=Cicer arietinum OX=3827 GN=LOC101491735 PE=3 SV=1	0.0712565
17	24	A0A1S2XQR4|A0A1S2XQR4_CICAR	189.54	34	34	206500	15	1	20	Pyro-glu from E; Pyro-glu from Q	51839	vicilin-like OS=Cicer arietinum OX=3827 GN=LOC101515515 PE=4 SV=1	0.00330796
18	27	A0A3Q7XNW1|A0A3Q7XNW1_CICAR	188.83	31	31	23827000	13	3	13	Carbamidomethylation; Pyro-glu from Q	56342	legumin-like OS=Cicer arietinum OX=3827 GN=LEG PE=3 SV=1	0.381689
34	36	A0A1S2Y850|A0A1S2Y850_CICAR	188.53	12	12	260670	8	1	8		80038	heat shock cognate protein 80 OS=Cicer arietinum OX=3827 GN=LOC101515120 PE=3 SV=1	0.00417572
26	31	sp|Q9SMJ4|LEG_CICAR	186.46	24	24	8323400	9	1	10	Carbamidomethylation; Pyro-glu from Q	56251	Legumin OS=Cicer arietinum OX=3827 GN=leg3 PE=1 SV=1	0.133334
31	25	A0A1S2X989|A0A1S2X989_CICAR	185.49	17	17	32667000	11	10	12	Pyro-glu from Q; Mutation	75522	stromal 70 kDa heat shock-related protein chloroplastic OS=Cicer arietinum OX=3827 GN=LOC101499290 PE=3 SV=1	0.523299
19	26	A0A1S2XQ88|A0A1S2XQ88_CICAR	182.15	32	32	2669300	13	2	17	Pyro-glu from E; Pyro-glu from Q	51087	vicilin-like OS=Cicer arietinum OX=3827 GN=LOC101505411 PE=4 SV=1	0.04276
21	33	A0A1S2XYZ0|A0A1S2XYZ0_CICAR	175.59	20	20	18852000	10	8	13	Oxidation (M); Pyro-glu from E; Pyro-glu from Q	64651	provicilin-like OS=Cicer arietinum OX=3827 GN=LOC101510367 PE=4 SV=1	0.301994
33	34	A0A1S2YLD1|A0A1S2YLD1_CICAR	173.74	17	17	15213000	10	7	12		79556	Transketolase OS=Cicer arietinum OX=3827 GN=LOC101500139 PE=3 SV=1	0.2437
29	30	A0A1S2YUQ3|A0A1S2YUQ3_CICAR	171.93	18	18	59495000	10	10	12	Carbamidomethylation; Oxidation (M)	64251	Peptidylprolyl isomerase OS=Cicer arietinum OX=3827 GN=LOC101514965 PE=4 SV=1	0.953061
39	51	A0A3Q7YF59|A0A3Q7YF59_CICAR	167.65	10	10	7821600	7	4	7	Pyro-glu from Q	80014	Transketolase OS=Cicer arietinum OX=3827 GN=LOC101511760 PE=3 SV=1	0.125296
20	39	A0A1S2XBN2|A0A1S2XBN2_CICAR	165.04	13	13	10817000	10	4	13	Oxidation (M); Acetylation (Protein N-term)	97493	Lipoxygenase OS=Cicer arietinum OX=3827 GN=LOC101491283 PE=3 SV=1	0.173279
35	38	A0A1S2YD12|A0A1S2YD12_CICAR	164.32	24	24	29886000	10	10	10	Pyro-glu from Q	62095	calnexin homolog OS=Cicer arietinum OX=3827 GN=LOC101489968 PE=3 SV=1	0.478749
37	43	A0A1S3E758|A0A1S3E758_CICAR	163.77	13	13	20293000	7	7	7		78242	isoamylase 3 chloroplastic isoform X3 OS=Cicer arietinum OX=3827 GN=LOC101496876 PE=4 SV=1	0.325077
27	41	A0A1S2Y5E7|A0A1S2Y5E7_CICAR	159.55	15	15	20471000	10	10	11	Pyro-glu from E	80664	Glycine--tRNA ligase OS=Cicer arietinum OX=3827 GN=LOC101510708 PE=3 SV=1	0.327929
22	50	Q304D4|Q304D4_CICAR	150.06	20	20	1222600	10	1	15	Pyro-glu from E; Pyro-glu from Q	51421	Provicilin OS=Cicer arietinum OX=3827 GN=LOC101515194 PE=2 SV=1	0.0195851
36	48	A0A1S2XV08|A0A1S2XV08_CICAR	149.89	22	22	10731000	7	7	10	Carbamidomethylation; Oxidation (M); Pyro-glu from Q	48256	basic 7S globulin-like OS=Cicer arietinum OX=3827 GN=LOC101504144 PE=3 SV=1	0.171902
43	46	A0A1S2YZW8|A0A1S2YZW8_CICAR	142.25	11	11	10022000	7	7	7		89092	Oligopeptidase A OS=Cicer arietinum OX=3827 GN=LOC101507357 PE=3 SV=1	0.160544
41	52	A0A1S2XH76|A0A1S2XH76_CICAR	125.7	10	10	9234700	5	5	5	Oxidation (M); Pyro-glu from Q	73557	alpha-dioxygenase 1 OS=Cicer arietinum OX=3827 GN=LOC101490863 PE=4 SV=1	0.147932
40	54	C3TS12|C3TS12_CICAR	113.63	9	9	6181600	4	4	4		84367	5-methyltetrahydropteroyltriglutamate--homocysteine S-methyltransferase OS=Cicer arietinum OX=3827 GN=LOC101490782 PE=2 SV=1	0.0990242
48	55	A0A1S2XVJ8|A0A1S2XVJ8_CICAR	97.33	7	7	14426000	3	3	4		53803	sucrose-binding protein-like OS=Cicer arietinum OX=3827 GN=LOC101499776 PE=4 SV=1	0.231093
54	80	A0A3Q7XPH5|A0A3Q7XPH5_CICAR	96.7	7	7	1062500	3	3	3		60359	RNA helicase OS=Cicer arietinum OX=3827 GN=LOC101498048 PE=4 SV=1	0.0170204
50	76	A0A1S2XVM2|A0A1S2XVM2_CICAR	96.19	9	9	3432100	2	2	3		35512	NADPH-dependent aldehyde reductase 1 chloroplastic-like OS=Cicer arietinum OX=3827 GN=LOC101506833 PE=4 SV=1	0.0549794
44	66	A0A1S2YQT1|A0A1S2YQT1_CICAR	94.46	5	5	56543	2	2	3	Pyro-glu from Q	80815	TBC1 domain family member 15 OS=Cicer arietinum OX=3827 GN=LOC101501105 PE=4 SV=1	0.000905773
55	82	A0A1S2YC83|A0A1S2YC83_CICAR	85.01	5	5	561690	2	2	2	Carbamidomethylation	66526	RNA helicase OS=Cicer arietinum OX=3827 GN=LOC101510281 PE=4 SV=1	0.00899781
52	74	A0A1S2XVG1|A0A1S2XVG1_CICAR	76.09	5	5	1605600	2	2	2	Carbamidomethylation	60371	legumin J-like OS=Cicer arietinum OX=3827 GN=LOC101501269 PE=3 SV=1	0.0257204
59	99	A0A1S2XHQ9|A0A1S2XHQ9_CICAR	73.49	8	8	4587700	2	2	2		49330	Elongation factor 1-alpha OS=Cicer arietinum OX=3827 GN=LOC101515489 PE=3 SV=1	0.0734912
62	112	A0A1S2YCQ2|A0A1S2YCQ2_CICAR	73.45	5	5	4396300	2	2	2		53318	Adenosylhomocysteinase OS=Cicer arietinum OX=3827 GN=LOC101492222 PE=3 SV=1	0.0704251
56	137	A0A1S2XSP2|A0A1S2XSP2_CICAR	68.26	10	10	1206800	2	2	3		21418	P24 oleosin-like OS=Cicer arietinum OX=3827 GN=LOC101492171 PE=3 SV=1	0.0193319

## Sheet: 5
Protein Group	Protein ID	Accession	Score	Coverage (%)	Coverage (%) Sample 1	Area Sample	#Peptides	#Unique	#Spec Sample 1	PTM	Avg. Mass	Description	Relative Abundance
2	4	A0A1S2XH76|A0A1S2XH76_CICAR	304.08	42	42	1120700000	24	23	41	Carbamidomethylation; Oxidation (M); Pyro-glu from E; Pyro-glu from Q; Acetylation (Protein N-term)	73557	alpha-dioxygenase 1 OS=Cicer arietinum OX=3827 GN=LOC101490863 PE=4 SV=1	53.4334
9	7	A0A1S2YJT8|A0A1S2YJT8_CICAR	280.87	28	28	15671000	15	2	23	Oxidation (M)	71173	heat shock cognate 70 kDa protein 2 OS=Cicer arietinum OX=3827 GN=LOC101501931 PE=3 SV=1	0.747172
7	6	A0A3Q7XXP6|A0A3Q7XXP6_CICAR	279.33	20	20	66873000	15	3	25	Oxidation (M)	106304	LOW QUALITY PROTEIN: heat shock cognate 70 kDa protein 2 OS=Cicer arietinum OX=3827 GN=LOC101501450 PE=4 SV=1	3.18841
5	9	A0A1S2Y087|A0A1S2Y087_CICAR	273.59	38	38	493060000	20	15	30	Pyro-glu from E; Pyro-glu from Q	69392	vicilin-like OS=Cicer arietinum OX=3827 GN=LOC101510695 PE=4 SV=1	23.5084
8	8	A0A1S2XET4|A0A1S2XET4_CICAR	259.67	33	33	160190000	16	16	19	Oxidation (M)	71295	seed biotin-containing protein SBP65 OS=Cicer arietinum OX=3827 GN=LOC101504303 PE=4 SV=1	7.63764
11	10	A0A1S2YEC8|A0A1S2YEC8_CICAR	257.03	22	22	10276000	14	2	17	Oxidation (M)	73532	luminal-binding protein OS=Cicer arietinum OX=3827 GN=LOC101513614 PE=3 SV=1	0.489946
10	14	A0A1S2YEC3|A0A1S2YEC3_CICAR	254.35	24	24	1933800	14	2	17	Oxidation (M)	73558	luminal-binding protein OS=Cicer arietinum OX=3827 GN=LOC101512653 PE=3 SV=1	0.0922009
22	27	A0A1S2YP37|A0A1S2YP37_CICAR	229.02	13	13	12355000	7	1	11	Oxidation (M)	71210	heat shock 70 kDa protein OS=Cicer arietinum OX=3827 GN=LOC101492688 PE=3 SV=1	0.58907
13	22	A0A3Q7YAD4|A0A3Q7YAD4_CICAR	226.16	20	20	61793000	14	10	15	Carbamidomethylation; Oxidation (M); Pyro-glu from Q	96937	Lipoxygenase OS=Cicer arietinum OX=3827 GN=LOC101491605 PE=3 SV=1	2.94621
17	20	A0A1S2XQR4|A0A1S2XQR4_CICAR	208.19	27	27	178800	12	1	15	Pyro-glu from Q	51839	vicilin-like OS=Cicer arietinum OX=3827 GN=LOC101515515 PE=4 SV=1	0.00852494
19	23	A0A1S2XQ88|A0A1S2XQ88_CICAR	198.27	23	23	2175800	9	1	12	Pyro-glu from Q	51087	vicilin-like OS=Cicer arietinum OX=3827 GN=LOC101505411 PE=4 SV=1	0.103739
31	24	A0A1S2XSB9|A0A1S2XSB9_CICAR	191.46	24	24	21193000	9	6	9	Carbamidomethylation	59343	legumin A-like OS=Cicer arietinum OX=3827 GN=LOC101489278 PE=3 SV=1	1.01045
26	26	A0A1S2YDV8|A0A1S2YDV8_CICAR	189.86	18	18	51539000	8	8	8	Oxidation (M)	63729	Phosphoglucomutase (alpha-D-glucose-1 6-bisphosphate-dependent) OS=Cicer arietinum OX=3827 GN=LOC101501824 PE=3 SV=1	2.45731
24	28	A0A1S2XBN2|A0A1S2XBN2_CICAR	182.08	10	10	10145000	8	4	8	Oxidation (M); Acetylation (Protein N-term)	97493	Lipoxygenase OS=Cicer arietinum OX=3827 GN=LOC101491283 PE=3 SV=1	0.4837
32	37	sp|Q9SMJ4|LEG_CICAR	178.6	18	18	5266000	6	1	6	Carbamidomethylation	56251	Legumin OS=Cicer arietinum OX=3827 GN=leg3 PE=1 SV=1	0.0251076
25	36	Q304D4|Q304D4_CICAR	178.09	17	17	3343800	9	1	12	Pyro-glu from Q	51421	Provicilin OS=Cicer arietinum OX=3827 GN=LOC101515194 PE=2 SV=1	0.159428
30	25	A0A1S2YXU4|A0A1S2YXU4_CICAR	175.04	19	19	13459000	8	8	10		65490	hsp70-Hsp90 organizing protein 3-like OS=Cicer arietinum OX=3827 GN=LOC101494428 PE=4 SV=1	0.641707
28	35	A0A3Q7XNW1|A0A3Q7XNW1_CICAR	173.62	18	18	893390	7	1	7	Carbamidomethylation	56342	legumin-like OS=Cicer arietinum OX=3827 GN=LEG PE=3 SV=1	0.0425956
33	38	A0A1S2XYZ0|A0A1S2XYZ0_CICAR	151.41	15	15	9776900	7	5	9	Pyro-glu from E; Pyro-glu from Q	64651	provicilin-like OS=Cicer arietinum OX=3827 GN=LOC101510367 PE=4 SV=1	0.466149
37	41	A0A1S2Z6C2|A0A1S2Z6C2_CICAR	145.75	11	11	6132300	5	5	5	Carbamidomethylation	77589	uncharacterized protein LOC101495970 OS=Cicer arietinum OX=3827 GN=LOC101495970 PE=3 SV=1	0.29238
34	39	A0A1S2YZW8|A0A1S2YZW8_CICAR	143.44	10	10	17429000	6	6	6		89092	Oligopeptidase A OS=Cicer arietinum OX=3827 GN=LOC101507357 PE=3 SV=1	0.830991
36	47	A0A1S2YJW2|A0A1S2YJW2_CICAR	136.96	6	6	11924000	4	4	4	Oxidation (M)	77121	Assimilatory sulfite reductase (ferredoxin) OS=Cicer arietinum OX=3827 GN=LOC101496235 PE=3 SV=1	0.56852
42	51	A0A1S2XV08|A0A1S2XV08_CICAR	126.41	14	14	4621100	5	5	5	Carbamidomethylation	48256	basic 7S globulin-like OS=Cicer arietinum OX=3827 GN=LOC101504144 PE=3 SV=1	0.220328
41	61	A0A1S2YQ71|A0A1S2YQ71_CICAR	102.71	5	5	101600	2	2	3		78719	peroxisomal fatty acid beta-oxidation multifunctional protein MFP2 OS=Cicer arietinum OX=3827 GN=LOC101492255 PE=3 SV=1	0.00484415
56	77	A0A1S2Y5E7|A0A1S2Y5E7_CICAR	89.73	5	5	1059300	2	2	2		80664	Glycine--tRNA ligase OS=Cicer arietinum OX=3827 GN=LOC101510708 PE=3 SV=1	0.050506
59	79	A0A1S2XVG1|A0A1S2XVG1_CICAR	86.79	6	6	25100	2	2	2	Carbamidomethylation	60371	legumin J-like OS=Cicer arietinum OX=3827 GN=LOC101501269 PE=3 SV=1	0.00119673

## Sheet: 6
Protein Group	Protein ID	Accession	Score	Coverage (%)	Coverage (%) Sample 1	Area Sample	#Peptides	#Unique	#Spec Sample 1	PTM	Avg. Mass	Description	Relative Abundance
1	2	A0A1S2Y087|A0A1S2Y087_CICAR	358.89	49	49	16583000000	41	36	154	Pyro-glu from E; Pyro-glu from Q; Mutation	69392	vicilin-like OS=Cicer arietinum OX=3827 GN=LOC101510695 PE=4 SV=1	95.0916
9	8	A0A3Q7YAD4|A0A3Q7YAD4_CICAR	242.7	24	24	87583000	17	13	19	Oxidation (M); Pyro-glu from Q; Acetylation (Protein N-term)	96937	Lipoxygenase OS=Cicer arietinum OX=3827 GN=LOC101491605 PE=3 SV=1	0.502226
3	7	A0A1S2XQR4|A0A1S2XQR4_CICAR	242.53	36	36	49091000	17	2	35	Pyro-glu from E; Pyro-glu from Q	51839	vicilin-like OS=Cicer arietinum OX=3827 GN=LOC101515515 PE=4 SV=1	0.281502
10	6	A0A1S2XET4|A0A1S2XET4_CICAR	231.21	22	22	171590000	13	13	15	Oxidation (M)	71295	seed biotin-containing protein SBP65 OS=Cicer arietinum OX=3827 GN=LOC101504303 PE=4 SV=1	0.983945
16	12	A0A1S2YX55|A0A1S2YX55_CICAR	229.52	21	21	93249000	8	8	9	Oxidation (M); Acetylation (Protein N-term)	62195	heat shock 70 kDa protein 8 OS=Cicer arietinum OX=3827 GN=LOC101509245 PE=3 SV=1	0.534716
4	9	A0A1S2XQ88|A0A1S2XQ88_CICAR	222.04	32	32	2003800	13	2	31	Pyro-glu from E; Pyro-glu from Q	51087	vicilin-like OS=Cicer arietinum OX=3827 GN=LOC101505411 PE=4 SV=1	0.0114904
7	24	Q304D4|Q304D4_CICAR	220.78	20	20	27692000	11	1	22	Pyro-glu from E; Pyro-glu from Q	51421	Provicilin OS=Cicer arietinum OX=3827 GN=LOC101515194 PE=2 SV=1	0.158794
14	11	A0A1S2XSB9|A0A1S2XSB9_CICAR	213.66	26	26	6168000	11	7	12	Pyro-glu from Q	59343	legumin A-like OS=Cicer arietinum OX=3827 GN=LOC101489278 PE=3 SV=1	0.0353691
12	10	A0A1S2YDV8|A0A1S2YDV8_CICAR	213.43	29	29	14940000	13	12	14	Carbamidomethylation; Oxidation (M)	63729	Phosphoglucomutase (alpha-D-glucose-1 6-bisphosphate-dependent) OS=Cicer arietinum OX=3827 GN=LOC101501824 PE=3 SV=1	0.0856702
27	28	sp|Q9SMJ4|LEG_CICAR	206.78	19	19	20295000	7	1	9	Pyro-glu from Q	56251	Legumin OS=Cicer arietinum OX=3827 GN=leg3 PE=1 SV=1	0.116377
22	13	A0A3Q7XNW1|A0A3Q7XNW1_CICAR	202.21	19	19	3299500	8	1	10	Pyro-glu from Q	56342	legumin-like OS=Cicer arietinum OX=3827 GN=LEG PE=3 SV=1	0.0189203
20	22	A0A1S2XBN2|A0A1S2XBN2_CICAR	191.83	10	10	39049000	8	5	9	Oxidation (M); Acetylation (Protein N-term)	97493	Lipoxygenase OS=Cicer arietinum OX=3827 GN=LOC101491283 PE=3 SV=1	0.223918
11	16	A0A1S2XYZ0|A0A1S2XYZ0_CICAR	186.14	22	22	36778000	10	8	15	Pyro-glu from E; Pyro-glu from Q	64651	provicilin-like OS=Cicer arietinum OX=3827 GN=LOC101510367 PE=4 SV=1	0.210895
13	21	A0A076L2J5|A0A076L2J5_CICAR	184.14	22	22	16756000	11	3	14	Oxidation (M)	73323	Heat shock protein OS=Cicer arietinum OX=3827 PE=3 SV=1	0.0960836
17	27	A0A1S2YI93|A0A1S2YI93_CICAR	173.1	18	18	456520	9	1	12	Oxidation (M)	72128	heat shock 70 kDa protein mitochondrial OS=Cicer arietinum OX=3827 GN=LOC101491898 PE=3 SV=1	0.00261781
26	23	A0A1S2YBR2|A0A1S2YBR2_CICAR	171.25	14	14	29429000	6	6	7	Pyro-glu from Q	59728	Protein disulfide-isomerase OS=Cicer arietinum OX=3827 GN=LOC101512854 PE=3 SV=1	0.168754
28	30	A0A1S2Y3E0|A0A1S2Y3E0_CICAR	167.98	12	12	9923700	5	5	6	Carbamidomethylation; Oxidation (M); Acetylation (Protein N-term)	67506	Pyrophosphate--fructose 6-phosphate 1-phosphotransferase subunit alpha OS=Cicer arietinum OX=3827 GN=LOC101493953 PE=3 SV=1	0.0569053
29	29	A0A1S2XV08|A0A1S2XV08_CICAR	157.2	23	23	16545000	7	7	8	Carbamidomethylation; Oxidation (M); Pyro-glu from Q	48256	basic 7S globulin-like OS=Cicer arietinum OX=3827 GN=LOC101504144 PE=3 SV=1	0.0948737
31	32	A0A1S2YIR6|A0A1S2YIR6_CICAR	155.97	11	11	10984000	5	5	5	Carbamidomethylation	71427	Polyadenylate-binding protein OS=Cicer arietinum OX=3827 GN=LOC101505043 PE=3 SV=1	0.0629854
25	36	A0A1S2YZ56|A0A1S2YZ56_CICAR	154.23	12	12	51879000	8	8	9	Pyro-glu from E	81876	vicilin-like seed storage protein At2g18540 OS=Cicer arietinum OX=3827 GN=LOC101506263 PE=4 SV=2	0.297489
46	51	A0A1S2XVM2|A0A1S2XVM2_CICAR	143.88	18	18	22818000	4	4	5		35512	NADPH-dependent aldehyde reductase 1 chloroplastic-like OS=Cicer arietinum OX=3827 GN=LOC101506833 PE=4 SV=1	0.130845
41	34	A0A1S2Y2K5|A0A1S2Y2K5_CICAR	140.79	12	12	8673400	4	4	4		58703	CCT-theta OS=Cicer arietinum OX=3827 GN=LOC101509300 PE=3 SV=1	0.0497357
48	56	A0A3Q7YG68|A0A3Q7YG68_CICAR	139.42	14	14	476100	4	4	4		45478	zinc finger protein ZPR1-like isoform X2 OS=Cicer arietinum OX=3827 GN=LOC101505357 PE=3 SV=1	0.00273009
36	37	A0A1S2XYQ5|A0A1S2XYQ5_CICAR	139.23	11	11	2808000	5	4	5		68754	Phosphoglucomutase (alpha-D-glucose-1 6-bisphosphate-dependent) OS=Cicer arietinum OX=3827 GN=LOC101490273 PE=3 SV=1	0.0161019
35	40	A0A1S2XH76|A0A1S2XH76_CICAR	131.99	10	10	8008900	4	4	5	Oxidation (M); Pyro-glu from Q	73557	alpha-dioxygenase 1 OS=Cicer arietinum OX=3827 GN=LOC101490863 PE=4 SV=1	0.0459253
37	38	A0A1S2XPP7|A0A1S2XPP7_CICAR	131.53	10	10	13082000	4	4	4		61288	Phosphoglycerate mutase (2 3-diphosphoglycerate-independent) OS=Cicer arietinum OX=3827 GN=LOC101512802 PE=3 SV=1	0.0750159
34	45	A0A1S3E1N3|A0A1S3E1N3_CICAR	129.95	5	5	25576000	3	3	4		62715	legumin J OS=Cicer arietinum OX=3827 GN=LOC101489055 PE=3 SV=1	0.14666
44	52	A0A1S2XVG1|A0A1S2XVG1_CICAR	129.02	9	9	8138800	3	3	4	Carbamidomethylation	60371	legumin J-like OS=Cicer arietinum OX=3827 GN=LOC101501269 PE=3 SV=1	0.0466702
43	39	A0A1S2Y1Q1|A0A1S2Y1Q1_CICAR	126.86	11	11	8971200	5	5	5		68809	leucine aminopeptidase OS=Cicer arietinum OX=3827 GN=LOC101514457 PE=3 SV=1	0.0514434
51	48	A0A1S2YNF8|A0A1S2YNF8_CICAR	124.15	11	11	537200	4	4	4	Pyro-glu from Q	61366	probable nucleolar protein 5-1 OS=Cicer arietinum OX=3827 GN=LOC101515595 PE=3 SV=1	0.00308046
60	73	A0A1S2YY53|A0A1S2YY53_CICAR	123.27	6	6	2138200	2	2	2		48001	acetylornithine deacetylase OS=Cicer arietinum OX=3827 GN=LOC101505292 PE=4 SV=1	0.012261
47	55	A0A1S2XHQ9|A0A1S2XHQ9_CICAR	121.1	10	10	13537000	3	3	3	Pyro-glu from Q	49330	Elongation factor 1-alpha OS=Cicer arietinum OX=3827 GN=LOC101515489 PE=3 SV=1	0.077625
54	93	A0A1S2YE72|A0A1S2YE72_CICAR	118.01	8	8	1003400	3	3	3		58790	60S ribosomal export protein NMD3 OS=Cicer arietinum OX=3827 GN=LOC101494816 PE=3 SV=1	0.00575378
42	41	A0A1S3E8Q6|A0A1S3E8Q6_CICAR	115.97	6	6	14773000	3	3	3		68427	uncharacterized protein LOC101510720 OS=Cicer arietinum OX=3827 GN=LOC101510720 PE=4 SV=1	0.0847125
58	64	A0A1S2YYS3|A0A1S2YYS3_CICAR	111.97	8	8	3837600	3	3	3		68572	Succinate dehydrogenase [ubiquinone] flavoprotein subunit mitochondrial OS=Cicer arietinum OX=3827 GN=LOC101500295 PE=3 SV=1	0.0220059
38	69	A0A1S2YXU4|A0A1S2YXU4_CICAR	109.62	7	7	3287900	3	3	4		65490	hsp70-Hsp90 organizing protein 3-like OS=Cicer arietinum OX=3827 GN=LOC101494428 PE=4 SV=1	0.0188537
55	59	A0A1S2XGX2|A0A1S2XGX2_CICAR	105.64	5	5	6819100	2	2	2		61198	2-hydroxyacyl-CoA lyase OS=Cicer arietinum OX=3827 GN=LOC101501749 PE=3 SV=1	0.0391026
53	49	A0A1S2YNS0|A0A1S2YNS0_CICAR	101.81	7	7	3713200	3	3	3	Oxidation (M)	68688	V-type proton ATPase catalytic subunit A OS=Cicer arietinum OX=3827 GN=LOC101513091 PE=3 SV=1	0.0212925
61	54	A0A1S2XVJ8|A0A1S2XVJ8_CICAR	93.25	5	5	14124000	2	2	2		53803	sucrose-binding protein-like OS=Cicer arietinum OX=3827 GN=LOC101499776 PE=4 SV=1	0.080991
49	58	A0A1S2YPX2|A0A1S2YPX2_CICAR	85.69	5	5	1541900	2	2	2		45826	embryonic protein DC-8-like OS=Cicer arietinum OX=3827 GN=LOC101509550 PE=4 SV=1	0.00884169
59	89	A0A3Q7XWI9|A0A3Q7XWI9_CICAR	83.11	7	7	2534600	2	2	2		47689	Phosphopyruvate hydratase OS=Cicer arietinum OX=3827 GN=LOC101497047 PE=3 SV=1	0.0145341
62	115	A0A3Q7XVV9|A0A3Q7XVV9_CICAR	81.72	5	5	1541200	2	2	2		67100	Phenylalanine--tRNA ligase OS=Cicer arietinum OX=3827 GN=LOC101489993 PE=3 SV=1	0.00883768
66	101	A0A1S2XZF3|A0A1S2XZF3_CICAR	69.66	5	5	323360	2	2	2		62785	D-3-phosphoglycerate dehydrogenase OS=Cicer arietinum OX=3827 GN=LOC101513477 PE=3 SV=1	0.00185424

## Sheet: 7
Protein Group	Protein ID	Accession	Score	Coverage (%)	Coverage (%) Sample 1	Area Sample	#Peptides	#Unique	#Spec Sample 1	PTM	Avg. Mass	Description	Relative Abundance
4	2	A0A1S2XSB9|A0A1S2XSB9_CICAR	295.96	56	56	497490000	26	18	46	Carbamidomethylation; Oxidation (M); Pyro-glu from Q	59343	legumin A-like OS=Cicer arietinum OX=3827 GN=LOC101489278 PE=3 SV=1	8.9709
2	6	A0A1S2YBR2|A0A1S2YBR2_CICAR	294.68	65	65	1637300000	31	31	65	Pyro-glu from E; Pyro-glu from Q	59728	Protein disulfide-isomerase OS=Cicer arietinum OX=3827 GN=LOC101512854 PE=3 SV=1	29.5243
5	4	A0A1S2Y087|A0A1S2Y087_CICAR	281.48	44	44	693180000	26	22	40	Pyro-glu from E; Pyro-glu from Q	69392	vicilin-like OS=Cicer arietinum OX=3827 GN=LOC101510695 PE=4 SV=1	12.4996
1	8	A0A1S2YZ56|A0A1S2YZ56_CICAR	274.12	26	26	1906400000	28	28	74	Carbamidomethylation; Oxidation (M); Pyro-glu from E; Pyro-glu from Q	81876	vicilin-like seed storage protein At2g18540 OS=Cicer arietinum OX=3827 GN=LOC101506263 PE=4 SV=2	34.3768
18	9	A0A1S2YKM3|A0A1S2YKM3_CICAR	236.53	31	31	77962000	14	14	15		62057	ruBisCO large subunit-binding protein subunit alpha chloroplastic OS=Cicer arietinum OX=3827 GN=LOC101503231 PE=3 SV=1	1.40584
8	10	A0A3Q7XNW1|A0A3Q7XNW1_CICAR	231.48	40	40	55162000	16	4	29	Carbamidomethylation; Oxidation (M); Pyro-glu from Q	56342	legumin-like OS=Cicer arietinum OX=3827 GN=LEG PE=3 SV=1	0.994699
12	11	A0A1S2YBP2|A0A1S2YBP2_CICAR	230	36	36	94193000	16	13	20	Carbamidomethylation; Pyro-glu from E; Pyro-glu from Q	54657	betaine aldehyde dehydrogenase 1 chloroplastic-like OS=Cicer arietinum OX=3827 GN=LOC101507930 PE=3 SV=1	1.69852
10	13	A0A1S2XET4|A0A1S2XET4_CICAR	227.79	36	36	104790000	19	19	24	Oxidation (M)	71295	seed biotin-containing protein SBP65 OS=Cicer arietinum OX=3827 GN=LOC101504303 PE=4 SV=1	1.88961
11	14	sp|Q9SMJ4|LEG_CICAR	217.84	29	29	14084000	11	1	20	Carbamidomethylation; Oxidation (M); Pyro-glu from Q	56251	Legumin OS=Cicer arietinum OX=3827 GN=leg3 PE=1 SV=1	0.253967
14	12	A0A1S2XYZ0|A0A1S2XYZ0_CICAR	215.36	29	29	67136000	14	12	19	Carbamidomethylation; Oxidation (M); Pyro-glu from E; Pyro-glu from Q	64651	provicilin-like OS=Cicer arietinum OX=3827 GN=LOC101510367 PE=4 SV=1	1.21062
19	18	A0A1S2XBN2|A0A1S2XBN2_CICAR	198.04	14	14	23465000	11	7	14	Oxidation (M); Pyro-glu from Q; Acetylation (Protein N-term)	97493	Lipoxygenase OS=Cicer arietinum OX=3827 GN=LOC101491283 PE=3 SV=1	0.423128
16	16	A0A1S2XZF3|A0A1S2XZF3_CICAR	195.32	27	27	59345000	11	11	14	Oxidation (M); Pyro-glu from Q	62785	D-3-phosphoglycerate dehydrogenase OS=Cicer arietinum OX=3827 GN=LOC101513477 PE=3 SV=1	1.07013
17	15	A0A3Q7YAD4|A0A3Q7YAD4_CICAR	194.32	16	16	21232000	12	8	15	Oxidation (M); Acetylation (Protein N-term)	96937	Lipoxygenase OS=Cicer arietinum OX=3827 GN=LOC101491605 PE=3 SV=1	0.382862
13	23	A0A1S2XQR4|A0A1S2XQR4_CICAR	182.62	33	33	4798700	14	2	18	Pyro-glu from E; Pyro-glu from Q	51839	vicilin-like OS=Cicer arietinum OX=3827 GN=LOC101515515 PE=4 SV=1	0.0865317
15	24	A0A1S2XQ88|A0A1S2XQ88_CICAR	178.13	35	35	2330600	13	2	17	Pyro-glu from E; Pyro-glu from Q	51087	vicilin-like OS=Cicer arietinum OX=3827 GN=LOC101505411 PE=4 SV=1	0.0420261
27	25	A0A1S3DXB5|A0A1S3DXB5_CICAR	170.05	29	29	3189300	11	2	11	Carbamidomethylation; Mutation	62977	ruBisCO large subunit-binding protein subunit beta chloroplastic OS=Cicer arietinum OX=3827 GN=LOC101512130 PE=3 SV=1	0.0575105
24	29	A0A1S2XDU8|A0A1S2XDU8_CICAR	170.02	24	24	15151000	9	7	12	Carbamidomethylation	58586	Importin subunit alpha OS=Cicer arietinum OX=3827 GN=LOC101497892 PE=3 SV=1	0.273208
30	28	A0A1S2Y3X0|A0A1S2Y3X0_CICAR	166.87	26	26	827650	10	1	10	Carbamidomethylation; Mutation	62839	ruBisCO large subunit-binding protein subunit beta chloroplastic-like isoform X2 OS=Cicer arietinum OX=3827 GN=LOC101495552 PE=3 SV=1	0.0149245
34	39	A0A1S2XPC9|A0A1S2XPC9_CICAR	162.31	14	14	29878000	7	6	9	Carbamidomethylation	65105	Pyruvate decarboxylase OS=Cicer arietinum OX=3827 GN=LOC101497155 PE=3 SV=1	0.53877
33	33	A0A1S2YRM0|A0A1S2YRM0_CICAR	162.3	16	16	9259400	6	3	7	Carbamidomethylation	54526	betaine aldehyde dehydrogenase 1 chloroplastic OS=Cicer arietinum OX=3827 GN=LOC101506136 PE=3 SV=1	0.166968
44	35	A0A1S2YZP7|A0A1S2YZP7_CICAR	159.26	14	14	11888000	5	5	5		60268	Aspartate--tRNA ligase OS=Cicer arietinum OX=3827 GN=LOC101508623 PE=3 SV=1	0.214368
46	48	A0A3Q7XNE4|A0A3Q7XNE4_CICAR	159.14	15	15	559700	5	2	7	Oxidation (M); Pyro-glu from Q	51843	Pyruvate kinase OS=Cicer arietinum OX=3827 GN=LOC101511963 PE=3 SV=1	0.0100927
26	30	A0A1S2XHA3|A0A1S2XHA3_CICAR	157.17	17	17	16958000	9	9	10		62601	Glucose-6-phosphate isomerase OS=Cicer arietinum OX=3827 GN=LOC101502187 PE=3 SV=1	0.305792
29	32	A0A1S2XXX7|A0A1S2XXX7_CICAR	156.01	22	22	16824000	6	6	9	Pyro-glu from Q	47869	Calreticulin OS=Cicer arietinum OX=3827 GN=LOC101511865 PE=3 SV=1	0.303376
31	34	A0A1S2XYI7|A0A1S2XYI7_CICAR	153.25	17	17	8516700	7	3	9	Carbamidomethylation	58978	Importin subunit alpha OS=Cicer arietinum OX=3827 GN=LOC101514886 PE=3 SV=1	0.153576
38	37	A0A1S2Z036|A0A1S2Z036_CICAR	152.38	15	15	16219000	7	7	8	Carbamidomethylation; Pyro-glu from Q	60366	T-complex protein 1 subunit gamma OS=Cicer arietinum OX=3827 GN=LOC101511617 PE=3 SV=1	0.292466
40	42	A0A1S2XVG1|A0A1S2XVG1_CICAR	148.69	14	14	2764000	6	6	7	Carbamidomethylation	60371	legumin J-like OS=Cicer arietinum OX=3827 GN=LOC101501269 PE=3 SV=1	0.0498413
39	51	A0A1S2XVF8|A0A1S2XVF8_CICAR	148.11	12	12	2229200	5	1	7	Carbamidomethylation	58801	Importin subunit alpha OS=Cicer arietinum OX=3827 GN=LOC101511961 PE=3 SV=1	0.0401977
36	31	A0A1S2XXR3|A0A1S2XXR3_CICAR	144.95	15	15	644900	6	3	6	Oxidation (M); Acetylation (Protein N-term)	57969	Pyruvate kinase OS=Cicer arietinum OX=3827 GN=LOC101509508 PE=3 SV=1	0.011629
42	41	A0A1S2XQD1|A0A1S2XQD1_CICAR	144.62	16	16	2423100	6	1	6	Oxidation (M); Pyro-glu from Q; Acetylation (Protein N-term)	57808	Pyruvate kinase OS=Cicer arietinum OX=3827 GN=LOC101496170 PE=3 SV=1	0.0436941
47	38	A0A1S2XDD9|A0A1S2XDD9_CICAR	142.75	14	14	8045500	6	6	6		65955	ATP citrate synthase OS=Cicer arietinum OX=3827 GN=LOC101498978 PE=4 SV=1	0.145079
57	49	A0A1S2XVM2|A0A1S2XVM2_CICAR	140.74	19	19	19765000	4	4	4		35512	NADPH-dependent aldehyde reductase 1 chloroplastic-like OS=Cicer arietinum OX=3827 GN=LOC101506833 PE=4 SV=1	0.356409
41	43	A0A1S2XVJ8|A0A1S2XVJ8_CICAR	131.71	13	13	31538000	6	6	6		53803	sucrose-binding protein-like OS=Cicer arietinum OX=3827 GN=LOC101499776 PE=4 SV=1	0.568703
35	44	A0A1S2XV08|A0A1S2XV08_CICAR	131.12	19	19	2072000	6	6	9	Carbamidomethylation; Oxidation (M); Pyro-glu from Q	48256	basic 7S globulin-like OS=Cicer arietinum OX=3827 GN=LOC101504144 PE=3 SV=1	0.037363
48	45	A0A3Q7XWI9|A0A3Q7XWI9_CICAR	123.71	18	18	804100	5	5	6	Carbamidomethylation	47689	Phosphopyruvate hydratase OS=Cicer arietinum OX=3827 GN=LOC101497047 PE=3 SV=1	0.0144998
54	59	A0A1S2XBX5|A0A1S2XBX5_CICAR	122.48	10	10	3350300	4	3	4		63272	Pyruvate decarboxylase OS=Cicer arietinum OX=3827 GN=LOC101496685 PE=3 SV=1	0.0604137
60	55	A0A1S2XKN6|A0A1S2XKN6_CICAR	122.05	11	11	4477900	4	4	4		58713	CCT-theta OS=Cicer arietinum OX=3827 GN=LOC101511081 PE=3 SV=1	0.0807469
50	47	A0A1S2Z962|A0A1S2Z962_CICAR	117.36	11	11	13176000	5	5	5	Oxidation (M)	56608	ATP-dependent 6-phosphofructokinase OS=Cicer arietinum OX=3827 GN=LOC101514136 PE=3 SV=1	0.237594
55	58	A0A1S2XQK0|A0A1S2XQK0_CICAR	115.42	15	15	625790	4	1	4	Carbamidomethylation	57046	CCT-beta OS=Cicer arietinum OX=3827 GN=LOC101506710 PE=3 SV=1	0.0112844
51	60	A0A1S2Z2F2|A0A1S2Z2F2_CICAR	114.18	13	13	286670	4	1	5	Carbamidomethylation	57063	CCT-beta OS=Cicer arietinum OX=3827 GN=LOC101505511 PE=3 SV=1	0.00516933
52	52	A0A1S2YCZ4|A0A1S2YCZ4_CICAR	113.14	13	13	7499400	5	5	5	Carbamidomethylation; Oxidation (M)	59248	T-complex protein 1 subunit epsilon OS=Cicer arietinum OX=3827 GN=LOC101500765 PE=3 SV=1	0.135232
58	56	A0A1S2Z0X6|A0A1S2Z0X6_CICAR	112.11	8	8	2931500	3	3	3		68045	Arginine--tRNA ligase OS=Cicer arietinum OX=3827 GN=LOC101511299 PE=3 SV=1	0.0528618
62	84	A0A1S2YK61|A0A1S2YK61_CICAR	108.23	9	9	4194200	3	3	4		52203	oxysterol-binding protein-related protein 3C-like OS=Cicer arietinum OX=3827 GN=LOC101496992 PE=3 SV=1	0.0756312
61	63	A0A3Q7K771|A0A3Q7K771_CICAR	97.71	18	18	19052000	4	4	4		26148	albumin-2-like OS=Cicer arietinum OX=3827 GN=LOC101512722 PE=4 SV=1	0.343552
53	57	A0A1S2Y169|A0A1S2Y169_CICAR	97.35	11	11	6628400	5	5	5	Pyro-glu from Q	58388	Coatomer subunit delta OS=Cicer arietinum OX=3827 GN=LOC101514354 PE=3 SV=1	0.119525
59	64	A0A1S2XCF6|A0A1S2XCF6_CICAR	94.3	10	10	4228500	4	4	4		64396	Dihydroxy-acid dehydratase OS=Cicer arietinum OX=3827 GN=LOC101495582 PE=3 SV=1	0.0762497
65	79	A0A1S2YNV5|A0A1S2YNV5_CICAR	92.22	5	5	3851200	2	2	2	Carbamidomethylation	62044	Pyrophosphate--fructose 6-phosphate 1-phosphotransferase subunit beta OS=Cicer arietinum OX=3827 GN=LOC101491165 PE=3 SV=1	0.0694461
64	68	A0A1S2XHQ9|A0A1S2XHQ9_CICAR	85.44	10	10	1218000	3	3	3		49330	Elongation factor 1-alpha OS=Cicer arietinum OX=3827 GN=LOC101515489 PE=3 SV=1	0.0219634
66	70	A0A3Q7YDM1|A0A3Q7YDM1_CICAR	79.22	9	9	1929300	3	3	3	Carbamidomethylation	53430	alpha-aminoadipic semialdehyde synthase isoform X5 OS=Cicer arietinum OX=3827 GN=LOC101500267 PE=4 SV=1	0.0347898
76	109	A0A1S2YP37|A0A1S2YP37_CICAR	78.03	5	5	1219300	2	2	2		71210	heat shock 70 kDa protein OS=Cicer arietinum OX=3827 GN=LOC101492688 PE=3 SV=1	0.0219868
72	104	A0A1S2XSP2|A0A1S2XSP2_CICAR	73.81	17	17	2581400	3	3	3	Pyro-glu from Q	21418	P24 oleosin-like OS=Cicer arietinum OX=3827 GN=LOC101492171 PE=3 SV=1	0.0465486
67	83	A0A1S2YE16|A0A1S2YE16_CICAR	71.84	8	8	278900	3	3	3	Oxidation (M)	63840	4-alpha-glucanotransferase OS=Cicer arietinum OX=3827 GN=LOC101492564 PE=3 SV=1	0.00502921
74	71	A0A3Q7XU71|A0A3Q7XU71_CICAR	71.17	5	5	1899100	2	1	2		55714	eukaryotic peptide chain release factor GTP-binding subunit ERF3A isoform X2 OS=Cicer arietinum OX=3827 GN=LOC101508052 PE=3 SV=1	0.0342452
86	226	A0A1S2XW02|A0A1S2XW02_CICAR	69.8	6	6	1339100	2	2	2		50381	ureidoglycolate hydrolase OS=Cicer arietinum OX=3827 GN=LOC101497175 PE=4 SV=1	0.0241471
69	94	A0A1S2YGW8|A0A1S2YGW8_CICAR	67.62	5	5	686980	2	2	2		59020	T-complex protein 1 subunit alpha OS=Cicer arietinum OX=3827 GN=LOC101503969 PE=3 SV=1	0.0123878
75	82	A0A1S2XSJ5|A0A1S2XSJ5_CICAR	61.92	5	5	1949300	2	2	2		49582	26S proteasome regulatory subunit 4 homolog A OS=Cicer arietinum OX=3827 GN=LOC101514002 PE=3 SV=1	0.0351504
73	77	A0A1S3EIC8|A0A1S3EIC8_CICAR	60.11	5	5	1508100	2	1	2		56269	eukaryotic peptide chain release factor GTP-binding subunit-like isoform X2 OS=Cicer arietinum OX=3827 GN=LOC101511195 PE=3 SV=1	0.0271945
80	162	A0A1S2XNH7|A0A1S2XNH7_CICAR	58.89	6	6	2261200	2	2	2		63397	Beta-hexosaminidase OS=Cicer arietinum OX=3827 GN=LOC101508517 PE=3 SV=1	0.0407747

## Sheet: 8
Protein Group	Protein ID	Accession	Score	Coverage (%)	Coverage (%) Sample 1	Area Sample	#Peptides	#Unique	#Spec Sample 1	PTM	Avg. Mass	Description	Relative Abundance
2	2	A0A3Q7XNW1|A0A3Q7XNW1_CICAR	329.55	50	50	404770000	29	8	51	Carbamidomethylation; Oxidation (M); Pyro-glu from Q	56342	legumin-like OS=Cicer arietinum OX=3827 GN=LEG PE=3 SV=1	8.79447
1	4	A0A1S2Y087|A0A1S2Y087_CICAR	317.44	40	40	3051900000	28	23	70	Pyro-glu from E; Pyro-glu from Q	69392	vicilin-like OS=Cicer arietinum OX=3827 GN=LOC101510695 PE=4 SV=1	66.3088
3	6	sp|Q9SMJ4|LEG_CICAR	307.09	34	34	115880000	19	1	33	Carbamidomethylation; Oxidation (M); Pyro-glu from Q	56251	Legumin OS=Cicer arietinum OX=3827 GN=leg3 PE=1 SV=1	2.51773
7	9	A0A1S2XVJ8|A0A1S2XVJ8_CICAR	267.33	30	30	348040000	14	14	22	Carbamidomethylation; Oxidation (M)	53803	sucrose-binding protein-like OS=Cicer arietinum OX=3827 GN=LOC101499776 PE=4 SV=1	7.56189
9	5	A0A1S2XYZ0|A0A1S2XYZ0_CICAR	263.87	28	28	291610000	16	14	24	Carbamidomethylation; Oxidation (M); Pyro-glu from E; Pyro-glu from Q	64651	provicilin-like OS=Cicer arietinum OX=3827 GN=LOC101510367 PE=4 SV=1	6.33583
5	10	A0A1S2XSB9|A0A1S2XSB9_CICAR	239.26	33	33	12701000	15	5	26	Carbamidomethylation; Oxidation (M); Pyro-glu from Q	59343	legumin A-like OS=Cicer arietinum OX=3827 GN=LOC101489278 PE=3 SV=1	0.275955
10	11	A0A1S2XQ88|A0A1S2XQ88_CICAR	217.11	25	25	2867200	10	1	21	Pyro-glu from E; Pyro-glu from Q	51087	vicilin-like OS=Cicer arietinum OX=3827 GN=LOC101505411 PE=4 SV=1	0.0622959
12	18	Q304D4|Q304D4_CICAR	204.98	17	17	3269900	9	1	18	Pyro-glu from E; Pyro-glu from Q	51421	Provicilin OS=Cicer arietinum OX=3827 GN=LOC101515194 PE=2 SV=1	0.0710453
18	13	A0A1S2XKM3|A0A1S2XKM3_CICAR	181.65	21	21	37912000	7	7	7		51565	UTP--glucose-1-phosphate uridylyltransferase OS=Cicer arietinum OX=3827 GN=LOC101489484 PE=3 SV=1	0.823717
20	17	A0A1S2YP09|A0A1S2YP09_CICAR	175.5	16	16	6551500	6	6	6	Pyro-glu from Q	59867	leucine aminopeptidase 1-like OS=Cicer arietinum OX=3827 GN=LOC101488227 PE=3 SV=1	0.142345
23	16	A0A1S2YRP8|A0A1S2YRP8_CICAR	171.39	16	16	25239000	7	7	8	Carbamidomethylation	58707	aldehyde dehydrogenase family 2 member B7 mitochondrial isoform X1 OS=Cicer arietinum OX=3827 GN=LOC101490532 PE=3 SV=1	0.548369
24	21	A0A1S2XET4|A0A1S2XET4_CICAR	171.2	8	8	23506000	5	5	5		71295	seed biotin-containing protein SBP65 OS=Cicer arietinum OX=3827 GN=LOC101504303 PE=4 SV=1	0.510716
14	15	A0A1S3E3A7|A0A1S3E3A7_CICAR	166.56	22	22	15135000	8	7	9		59823	ATP synthase subunit beta OS=Cicer arietinum OX=3827 GN=LOC101500213 PE=3 SV=1	0.328839
16	20	A0A1S2XV08|A0A1S2XV08_CICAR	165.35	23	23	14604000	7	7	9	Carbamidomethylation; Oxidation (M)	48256	basic 7S globulin-like OS=Cicer arietinum OX=3827 GN=LOC101504144 PE=3 SV=1	0.317302
25	32	A0A3Q7YAD4|A0A3Q7YAD4_CICAR	163.08	6	6	4813500	4	3	4		96937	Lipoxygenase OS=Cicer arietinum OX=3827 GN=LOC101491605 PE=3 SV=1	0.104583
28	33	A0A1S2YEM1|A0A1S2YEM1_CICAR	160.62	9	9	6293200	4	4	5	Pyro-glu from Q	57324	T-complex protein 1 subunit delta OS=Cicer arietinum OX=3827 GN=LOC101507421 PE=3 SV=1	0.136733
32	34	A0A1S3EHZ1|A0A1S3EHZ1_CICAR	157.77	13	13	22941000	5	5	5		53797	Glutathione reductase OS=Cicer arietinum OX=3827 GN=LOC101506077 PE=3 SV=1	0.498441
22	19	A0A1S2YB61|A0A1S2YB61_CICAR	156.35	18	18	35423000	7	7	8	Carbamidomethylation; Oxidation (M); Pyro-glu from Q	51768	Serine hydroxymethyltransferase OS=Cicer arietinum OX=3827 GN=LOC101491885 PE=3 SV=1	0.769638
21	24	A0A1S2XHQ9|A0A1S2XHQ9_CICAR	151.98	16	16	56285000	5	5	7	Oxidation (M); Pyro-glu from Q	49330	Elongation factor 1-alpha OS=Cicer arietinum OX=3827 GN=LOC101515489 PE=3 SV=1	1.22291
36	35	A0A1S2XLB4|A0A1S2XLB4_CICAR	150.37	14	14	20351000	4	4	4		47515	Protein disulfide-isomerase OS=Cicer arietinum OX=3827 GN=LOC101508932 PE=3 SV=1	0.442168
30	31	A0A1S2Z6B6|A0A1S2Z6B6_CICAR	148.48	14	14	9410900	5	5	5		52640	Argininosuccinate synthase OS=Cicer arietinum OX=3827 GN=LOC101489509 PE=3 SV=1	0.204471
35	38	O65744|O65744_CICAR	138.82	9	9	11234000	3	3	3	Carbamidomethylation; Acetylation (Protein N-term)	49647	Guanosine nucleotide diphosphate dissociation inhibitor OS=Cicer arietinum OX=3827 GN=gdi PE=2 SV=1	0.244082
34	39	Q9AT06|Q9AT06_CICAR	138.53	11	11	9601900	4	4	4	Oxidation (M)	56368	Glucose-1-phosphate adenylyltransferase OS=Cicer arietinum OX=3827 GN=LOC101493964 PE=2 SV=1	0.208621
37	40	A0A1S2YUA0|A0A1S2YUA0_CICAR	127.17	15	15	3329500	5	5	5	Pyro-glu from Q	56848	uncharacterized protein LOC101495060 isoform X1 OS=Cicer arietinum OX=3827 GN=LOC101495060 PE=4 SV=1	0.0723403
48	63	A0A1S2XVG1|A0A1S2XVG1_CICAR	126.65	6	6	4202200	2	2	3		60371	legumin J-like OS=Cicer arietinum OX=3827 GN=LOC101501269 PE=3 SV=1	0.0913015
47	47	A0A1S2Y7P2|A0A1S2Y7P2_CICAR	125.71	13	13	3773800	4	4	4	Carbamidomethylation	52592	probable aspartyl aminopeptidase OS=Cicer arietinum OX=3827 GN=LOC101500969 PE=3 SV=1	0.0819936
49	53	A0A1S2XW85|A0A1S2XW85_CICAR	124.88	8	8	4388100	4	4	4		67206	Starch synthase chloroplastic/amyloplastic OS=Cicer arietinum OX=3827 GN=LOC101494573 PE=3 SV=1	0.0953406
45	49	Q9M3Z6|Q9M3Z6_CICAR	123.6	14	14	346800	4	4	4		50262	RuvB-like helicase OS=Cicer arietinum OX=3827 GN=LOC101488434 PE=2 SV=1	0.00753495
39	58	A0A1S2YCQ2|A0A1S2YCQ2_CICAR	122.25	7	7	1660700	4	1	4	Acetylation (Protein N-term)	53318	Adenosylhomocysteinase OS=Cicer arietinum OX=3827 GN=LOC101492222 PE=3 SV=1	0.0360821
51	65	A0A1S2XVM2|A0A1S2XVM2_CICAR	105.04	9	9	3247300	2	2	2		35512	NADPH-dependent aldehyde reductase 1 chloroplastic-like OS=Cicer arietinum OX=3827 GN=LOC101506833 PE=4 SV=1	0.0705543
43	54	A0A1S2YPX2|A0A1S2YPX2_CICAR	102.91	6	6	1379200	2	2	2		45826	embryonic protein DC-8-like OS=Cicer arietinum OX=3827 GN=LOC101509550 PE=4 SV=1	0.029966
29	48	A0A1S2YZ56|A0A1S2YZ56_CICAR	102.46	6	6	29681000	4	4	4	Carbamidomethylation; Pyro-glu from Q	81876	vicilin-like seed storage protein At2g18540 OS=Cicer arietinum OX=3827 GN=LOC101506263 PE=4 SV=2	0.644881
66	187	A0A1S2Y738|A0A1S2Y738_CICAR	102.08	9	9	1745400	2	2	2		41353	protein DJ-1 homolog D OS=Cicer arietinum OX=3827 GN=LOC101494485 PE=3 SV=1	0.0379224
50	66	A0A067XTY1|A0A067XTY1_CICAR	100.61	6	6	6922800	2	2	2	Oxidation (M)	53868	Glycosyltransferase OS=Cicer arietinum OX=3827 GN=UGT73K2 PE=3 SV=1	0.150412
41	72	A0A1S2YM01|A0A1S2YM01_CICAR	97.96	5	5	1607500	2	2	4		50610	Tubulin beta chain OS=Cicer arietinum OX=3827 GN=LOC101497443 PE=3 SV=1	0.0349263
53	87	A0A1S2YP92|A0A1S2YP92_CICAR	96.84	6	6	5377300	2	2	2		53743	Xylose isomerase OS=Cicer arietinum OX=3827 GN=LOC101511586 PE=3 SV=1	0.116833
60	98	A0A1S2Y9I6|A0A1S2Y9I6_CICAR	89.83	6	6	1510400	2	2	2		57140	Glucose-1-phosphate adenylyltransferase OS=Cicer arietinum OX=3827 GN=LOC101491881 PE=3 SV=1	0.0328166
61	102	A0A3Q7XWI9|A0A3Q7XWI9_CICAR	75.7	7	7	2137500	2	2	2		47689	Phosphopyruvate hydratase OS=Cicer arietinum OX=3827 GN=LOC101497047 PE=3 SV=1	0.0464416

## Sheet: 9
Protein Group	Protein ID	Accession	Score	Coverage (%)	Coverage (%) Sample 1	Area Sample 2	#Peptides	#Unique	#Spec Sample 1	PTM	Avg. Mass	Description	Relative Abundance
2	2	A0A1S2XVJ8|A0A1S2XVJ8_CICAR	363.89	58	58	5953600000	39	39	110	Carbamidomethylation; Oxidation (M); Pyro-glu from E; Pyro-glu from Q	53803	sucrose-binding protein-like OS=Cicer arietinum OX=3827 GN=LOC101499776 PE=4 SV=1	31.7926
3	3	A0A1S2YPX2|A0A1S2YPX2_CICAR	341.67	61	61	352200000	39	39	97	Pyro-glu from E; Acetylation (Protein N-term)	45826	embryonic protein DC-8-like OS=Cicer arietinum OX=3827 GN=LOC101509550 PE=4 SV=1	1.88077
1	4	A0A1S2XYZ0|A0A1S2XYZ0_CICAR	332.73	46	46	10573000000	33	30	138	Carbamidomethylation; Oxidation (M); Pyro-glu from E; Pyro-glu from Q	64651	provicilin-like OS=Cicer arietinum OX=3827 GN=LOC101510367 PE=4 SV=1	56.4605
4	7	A0A1S2XQR4|A0A1S2XQR4_CICAR	264.34	49	49	58571000	21	2	51	Pyro-glu from E; Pyro-glu from Q	51839	vicilin-like OS=Cicer arietinum OX=3827 GN=LOC101515515 PE=4 SV=1	0.312773
18	21	A0A1S2X984|A0A1S2X984_CICAR	253.91	25	25	264530000	10	10	14	Oxidation (M)	47917	elongation factor 1-gamma OS=Cicer arietinum OX=3827 GN=LOC101496237 PE=4 SV=1	1.41261
6	8	A0A1S2XQ88|A0A1S2XQ88_CICAR	251.16	43	43	1643900	17	1	46	Pyro-glu from E; Pyro-glu from Q	51087	vicilin-like OS=Cicer arietinum OX=3827 GN=LOC101505411 PE=4 SV=1	0.00877853
9	17	Q304D4|Q304D4_CICAR	244.53	28	28	25076000	13	1	25	Pyro-glu from E; Pyro-glu from Q	51421	Provicilin OS=Cicer arietinum OX=3827 GN=LOC101515194 PE=2 SV=1	0.133907
10	13	A0A1S2XHQ9|A0A1S2XHQ9_CICAR	240.6	36	36	821280000	14	14	25	Carbamidomethylation; Oxidation (M); Pyro-glu from E; Pyro-glu from Q	49330	Elongation factor 1-alpha OS=Cicer arietinum OX=3827 GN=LOC101515489 PE=3 SV=1	4.38569
12	9	A0A1S2XH76|A0A1S2XH76_CICAR	237.15	31	31	208910000	17	17	22	Oxidation (M); Pyro-glu from Q	73557	alpha-dioxygenase 1 OS=Cicer arietinum OX=3827 GN=LOC101490863 PE=4 SV=1	1.11559
11	16	A0A1S2Y087|A0A1S2Y087_CICAR	213.49	23	23	23780000	13	9	21	Pyro-glu from E; Pyro-glu from Q	69392	vicilin-like OS=Cicer arietinum OX=3827 GN=LOC101510695 PE=4 SV=1	0.126987
23	26	A0A1S2XV08|A0A1S2XV08_CICAR	196.99	31	31	36069000	10	10	12	Carbamidomethylation; Oxidation (M)	48256	basic 7S globulin-like OS=Cicer arietinum OX=3827 GN=LOC101504144 PE=3 SV=1	0.192611
29	25	A0A1S2XSB9|A0A1S2XSB9_CICAR	191.12	21	21	3608000	8	6	10		59343	legumin A-like OS=Cicer arietinum OX=3827 GN=LOC101489278 PE=3 SV=1	0.0192669
25	22	A0A1S2XKM3|A0A1S2XKM3_CICAR	180.46	22	22	43564000	7	7	7		51565	UTP--glucose-1-phosphate uridylyltransferase OS=Cicer arietinum OX=3827 GN=LOC101489484 PE=3 SV=1	0.232635
22	28	A0A1S2YZ56|A0A1S2YZ56_CICAR	177.02	12	12	209150000	9	9	12	Carbamidomethylation; Pyro-glu from E; Pyro-glu from Q	81876	vicilin-like seed storage protein At2g18540 OS=Cicer arietinum OX=3827 GN=LOC101506263 PE=4 SV=2	1.11687
38	35	sp|Q9SMJ4|LEG_CICAR	169.87	13	13	6052200	4	1	5		56251	Legumin OS=Cicer arietinum OX=3827 GN=leg3 PE=1 SV=1	0.0323191
31	30	A0A3Q7XNW1|A0A3Q7XNW1_CICAR	168.87	14	14	3041400	5	1	7		56342	legumin-like OS=Cicer arietinum OX=3827 GN=LEG PE=3 SV=1	0.0162413
30	29	A0A1S2XRH3|A0A1S2XRH3_CICAR	168.32	27	27	17775000	8	5	9	Carbamidomethylation	43395	ERBB-3 BINDING PROTEIN 1 OS=Cicer arietinum OX=3827 GN=LOC101495952 PE=3 SV=1	0.0949196
26	31	A0A3Q7YDJ6|A0A3Q7YDJ6_CICAR	155.74	9	9	68640	7	2	7	Pyro-glu from Q	95206	DEAD-box ATP-dependent RNA helicase 30-like OS=Cicer arietinum OX=3827 GN=LOC101506463 PE=4 SV=1	0.000366542
43	69	A0A1S2XVG1|A0A1S2XVG1_CICAR	141.64	6	6	7695800	2	2	3		60371	legumin J-like OS=Cicer arietinum OX=3827 GN=LOC101501269 PE=3 SV=1	0.0410961
37	43	A0A1S3DXR7|A0A1S3DXR7_CICAR	139.31	18	18	4277600	4	1	5	Carbamidomethylation	36379	ERBB-3 BINDING PROTEIN 1-like isoform X2 OS=Cicer arietinum OX=3827 GN=LOC101506140 PE=3 SV=1	0.0228427
27	34	A0A1S2XET4|A0A1S2XET4_CICAR	137.02	8	8	1757000	4	4	5		71295	seed biotin-containing protein SBP65 OS=Cicer arietinum OX=3827 GN=LOC101504303 PE=4 SV=1	0.00938249
36	39	A0A1S2XNB3|A0A1S2XNB3_CICAR	128.64	10	10	6862700	3	3	4	Pyro-glu from E	53691	6-phosphogluconate dehydrogenase decarboxylating OS=Cicer arietinum OX=3827 GN=LOC101509898 PE=3 SV=1	0.0366473
39	48	A0A1S2XWS9|A0A1S2XWS9_CICAR	126.53	15	15	3182700	4	4	4	Oxidation (M); Pyro-glu from Q	47407	26S proteasome regulatory subunit 6A homolog OS=Cicer arietinum OX=3827 GN=LOC101496953 PE=3 SV=1	0.0169958
33	44	B5LMK8|B5LMK8_CICAR	125.43	6	6	1798000	3	3	4	Carbamidomethylation; Pyro-glu from E	52686	Ribulose bisphosphate carboxylase large chain OS=Cicer arietinum OX=3827 GN=rbcL PE=3 SV=1	0.00960143
35	40	O65744|O65744_CICAR	125.29	9	9	8753800	3	3	4	Carbamidomethylation; Oxidation (M); Acetylation (Protein N-term)	49647	Guanosine nucleotide diphosphate dissociation inhibitor OS=Cicer arietinum OX=3827 GN=gdi PE=2 SV=1	0.0467458
42	37	A0A1S2Y9C6|A0A1S2Y9C6_CICAR	123.38	10	10	12081000	4	4	4		55627	probable 26S proteasome non-ATPase regulatory subunit 3 OS=Cicer arietinum OX=3827 GN=LOC101499693 PE=3 SV=1	0.0645133
45	41	A0A1S2YEI9|A0A1S2YEI9_CICAR	117.05	11	11	4399800	4	4	4	Pyro-glu from E	53823	6-phosphogluconate dehydrogenase decarboxylating OS=Cicer arietinum OX=3827 GN=LOC101506872 PE=3 SV=1	0.0234952
50	50	Q9AT06|Q9AT06_CICAR	114.82	7	7	10878000	3	3	3		56368	Glucose-1-phosphate adenylyltransferase OS=Cicer arietinum OX=3827 GN=LOC101493964 PE=2 SV=1	0.0580892
48	64	A0A1S2XVM2|A0A1S2XVM2_CICAR	113.04	18	18	6119600	4	4	4		35512	NADPH-dependent aldehyde reductase 1 chloroplastic-like OS=Cicer arietinum OX=3827 GN=LOC101506833 PE=4 SV=1	0.0326791
47	58	A0A1S2YG51|A0A1S2YG51_CICAR	112.98	11	11	8729400	4	4	5	Pyro-glu from Q	49513	Tubulin alpha chain OS=Cicer arietinum OX=3827 GN=LOC101502988 PE=3 SV=1	0.0466155
46	71	A0A1S3E738|A0A1S3E738_CICAR	110.64	7	7	14827000	2	2	2		44249	iridoid synthase CYC2-like OS=Cicer arietinum OX=3827 GN=LOC101510608 PE=4 SV=1	0.0791771
40	55	A0A1S2YEA7|A0A1S2YEA7_CICAR	108.81	6	6	4148500	2	2	2		59277	Biotin carboxylase OS=Cicer arietinum OX=3827 GN=LOC101505461 PE=4 SV=1	0.0221533
61	75	A0A1S2Y6H8|A0A1S2Y6H8_CICAR	101.78	8	8	4594200	3	3	3	Oxidation (M)	51176	RuvB-like helicase OS=Cicer arietinum OX=3827 GN=LOC101506639 PE=3 SV=2	0.0245333
52	72	A0A3Q7K7X4|A0A3Q7K7X4_CICAR	100.47	7	7	1836600	2	2	2		50173	Dihydrolipoyllysine-residue succinyltransferase OS=Cicer arietinum OX=3827 GN=LOC101509571 PE=3 SV=1	0.00980756
60	66	A0A1S2YAB6|A0A1S2YAB6_CICAR	93.5	6	6	12913000	3	3	3		59490	cytochrome P450 71A1-like OS=Cicer arietinum OX=3827 GN=LOC101504821 PE=3 SV=1	0.0689562
56	84	A0A1S2XUE7|A0A1S2XUE7_CICAR	93.2	9	9	5820200	2	2	2		33185	DNA damage-repair/toleration protein DRT102 OS=Cicer arietinum OX=3827 GN=LOC101496513 PE=4 SV=1	0.0310802
69	113	A0A1S2YHM9|A0A1S2YHM9_CICAR	64.99	7	7	3775800	2	2	2	Oxidation (M)	50194	Beta-ketoacyl-[acyl-carrier-protein] synthase I OS=Cicer arietinum OX=3827 GN=LOC101491586 PE=3 SV=1	0.020163

## Sheet: 10
Protein Group	Protein ID	Accession	Score	Coverage (%)	Coverage (%) Sample 1	Area Sample 2	#Peptides	#Unique	#Spec Sample 1	PTM	Avg. Mass	Description	Relative Abundance
4	6	A0A1S2XV08|A0A1S2XV08_CICAR	251.08	37	37	1143700000	18	18	33	Carbamidomethylation; Oxidation (M); Pyro-glu from Q; Mutation	48256	basic 7S globulin-like OS=Cicer arietinum OX=3827 GN=LOC101504144 PE=3 SV=1	28.8319
3	11	A0A1S2XVG1|A0A1S2XVG1_CICAR	250.18	30	30	1314600000	16	16	27	Carbamidomethylation	60371	legumin J-like OS=Cicer arietinum OX=3827 GN=LOC101501269 PE=3 SV=1	33.1402
7	5	A0A1S2XET4|A0A1S2XET4_CICAR	239.34	30	30	20020000	17	17	24	Oxidation (M)	71295	seed biotin-containing protein SBP65 OS=Cicer arietinum OX=3827 GN=LOC101504303 PE=4 SV=1	0.50469
8	7	A0A1S3E926|A0A1S3E926_CICAR	230.91	40	40	134470000	13	5	21	Oxidation (M)	41712	uncharacterized protein LOC101503086 isoform X1 OS=Cicer arietinum OX=3827 GN=LOC101503086 PE=3 SV=1	3.3899
9	8	A0A1S2X9D4|A0A1S2X9D4_CICAR	229.08	38	38	131750000	13	5	20	Oxidation (M)	41677	actin-101-like OS=Cicer arietinum OX=3827 GN=LOC101501090 PE=3 SV=1	3.32133
6	13	A0A1S2YBZ6|A0A1S2YBZ6_CICAR	213.96	40	40	718390000	15	15	26	Carbamidomethylation; Oxidation (M); Acetylation (Protein N-term)	41069	alcohol dehydrogenase 1 OS=Cicer arietinum OX=3827 GN=LOC101488883 PE=3 SV=1	18.1101
11	12	A0A1S2XQ88|A0A1S2XQ88_CICAR	202.89	35	35	1561000	14	5	15	Pyro-glu from Q	51087	vicilin-like OS=Cicer arietinum OX=3827 GN=LOC101505411 PE=4 SV=1	0.0393517
18	14	A0A1S2XMI2|A0A1S2XMI2_CICAR	198.12	44	44	41097000	11	11	15	Oxidation (M); Pyro-glu from Q	41511	acetyl-CoA acetyltransferase cytosolic 1 OS=Cicer arietinum OX=3827 GN=LOC101489491 PE=3 SV=1	1.03603
27	31	A0A1S2XQX3|A0A1S2XQX3_CICAR	196.41	22	22	27242000	7	6	8		43296	Glyceraldehyde-3-phosphate dehydrogenase OS=Cicer arietinum OX=3827 GN=LOC101493610 PE=3 SV=1	0.686752
15	15	A0A1S2XQR4|A0A1S2XQR4_CICAR	193.85	32	32	12836000	12	2	12	Pyro-glu from Q	51839	vicilin-like OS=Cicer arietinum OX=3827 GN=LOC101515515 PE=4 SV=1	0.323587
16	19	A0A1S2XRW4|A0A1S2XRW4_CICAR	193.6	26	26	2457600	9	1	13	Oxidation (M)	41705	actin-3 OS=Cicer arietinum OX=3827 GN=ACTIN PE=3 SV=1	0.0619544
21	26	A0A1S2Z6X6|A0A1S2Z6X6_CICAR	188.62	18	18	50038000	8	8	10	Carbamidomethylation; Pyro-glu from E; Pyro-glu from Q	48590	uncharacterized protein LOC101512941 OS=Cicer arietinum OX=3827 GN=LOC101512941 PE=4 SV=1	1.26142
17	25	A0A1S2XNR4|A0A1S2XNR4_CICAR	188.37	22	22	2273800	8	1	13	Oxidation (M)	41773	actin-11 OS=Cicer arietinum OX=3827 GN=LOC101510220 PE=3 SV=1	0.0573209
14	17	A0A1S2XSB9|A0A1S2XSB9_CICAR	177.8	31	31	61204000	11	8	14	Oxidation (M); Pyro-glu from Q	59343	legumin A-like OS=Cicer arietinum OX=3827 GN=LOC101489278 PE=3 SV=1	1.54291
25	42	A0A1S2YAB3|A0A1S2YAB3_CICAR	168.49	15	15	18948000	5	5	9	Oxidation (M); Pyro-glu from Q	53584	elongation factor Tu chloroplastic OS=Cicer arietinum OX=3827 GN=LOC101508466 PE=3 SV=1	0.477666
26	22	A0A3Q7XNW1|A0A3Q7XNW1_CICAR	166.27	17	17	26665000	7	2	8	Pyro-glu from Q	56342	legumin-like OS=Cicer arietinum OX=3827 GN=LEG PE=3 SV=1	0.672206
24	38	Q304D4|Q304D4_CICAR	162.16	19	19	686900	7	1	8	Pyro-glu from Q	51421	Provicilin OS=Cicer arietinum OX=3827 GN=LOC101515194 PE=2 SV=1	0.0173163
29	35	A0A1S2Y813|A0A1S2Y813_CICAR	159.94	14	14	8315700	5	4	6	Carbamidomethylation	56939	glyceraldehyde-3-phosphate dehydrogenase B chloroplastic OS=Cicer arietinum OX=3827 GN=LOC101505130 PE=3 SV=1	0.209633
30	36	sp|Q9SMJ4|LEG_CICAR	157.26	15	15	4978100	5	1	6	Pyro-glu from Q	56251	Legumin OS=Cicer arietinum OX=3827 GN=leg3 PE=1 SV=1	0.125494
22	27	A0A1S2XYZ0|A0A1S2XYZ0_CICAR	153.46	15	15	16619000	7	6	7	Pyro-glu from Q	64651	provicilin-like OS=Cicer arietinum OX=3827 GN=LOC101510367 PE=4 SV=1	0.418954
23	34	A0A1S2Y087|A0A1S2Y087_CICAR	152.56	11	11	25422000	5	4	5		69392	vicilin-like OS=Cicer arietinum OX=3827 GN=LOC101510695 PE=4 SV=1	0.640871
33	41	A0A1S2Z3N0|A0A1S2Z3N0_CICAR	148.71	20	20	20567000	6	6	7	Carbamidomethylation; Oxidation (M); Pyro-glu from Q	49876	lanC-like protein GCL2 OS=Cicer arietinum OX=3827 GN=LOC101510132 PE=3 SV=2	0.51848
37	30	A0A1S2XJF9|A0A1S2XJF9_CICAR	146.06	18	18	9749600	6	6	6		48285	Transaldolase OS=Cicer arietinum OX=3827 GN=LOC101507457 PE=3 SV=1	0.245781
39	65	A0A1S2Y738|A0A1S2Y738_CICAR	145.36	13	13	37527000	3	3	5		41353	protein DJ-1 homolog D OS=Cicer arietinum OX=3827 GN=LOC101494485 PE=3 SV=1	0.94603
28	39	A0A1S2Y987|A0A1S2Y987_CICAR	139.97	16	16	691200	7	3	7	Acetylation (Protein N-term)	50685	26S proteasome non-ATPase regulatory subunit 12 homolog A-like OS=Cicer arietinum OX=3827 GN=LOC101511348 PE=3 SV=1	0.0174247
34	45	A0A1S3E1N3|A0A1S3E1N3_CICAR	130.8	10	10	55513000	5	5	5	Oxidation (M)	62715	legumin J OS=Cicer arietinum OX=3827 GN=LOC101489055 PE=3 SV=1	1.39944
35	43	A0A1S2YG26|A0A1S2YG26_CICAR	125.55	11	11	2023800	5	1	5		50537	26S proteasome non-ATPase regulatory subunit 12 homolog A-like OS=Cicer arietinum OX=3827 GN=LOC101506211 PE=3 SV=1	0.0510186
32	44	A0A1S2XM64|A0A1S2XM64_CICAR	120.24	17	17	14772000	5	5	6	Carbamidomethylation; Oxidation (M)	45936	Isocitrate dehydrogenase [NADP] OS=Cicer arietinum OX=3827 GN=LOC101490353 PE=3 SV=1	0.372392
42	47	A0A3Q7YAD4|A0A3Q7YAD4_CICAR	116.5	5	5	4093400	3	3	4	Oxidation (M); Acetylation (Protein N-term)	96937	Lipoxygenase OS=Cicer arietinum OX=3827 GN=LOC101491605 PE=3 SV=1	0.103192
50	53	A0A1S2XVJ8|A0A1S2XVJ8_CICAR	115.18	8	8	8290800	3	3	3		53803	sucrose-binding protein-like OS=Cicer arietinum OX=3827 GN=LOC101499776 PE=4 SV=1	0.209005
48	61	A0A1S2XVM2|A0A1S2XVM2_CICAR	108.42	12	12	12391000	3	3	4		35512	NADPH-dependent aldehyde reductase 1 chloroplastic-like OS=Cicer arietinum OX=3827 GN=LOC101506833 PE=4 SV=1	0.312369
46	59	A0A1S2YSZ6|A0A1S2YSZ6_CICAR	107.85	9	9	62600	3	3	4		47815	Phosphoserine aminotransferase OS=Cicer arietinum OX=3827 GN=LOC101514196 PE=3 SV=1	0.0015781
36	48	A0A1S3E8K4|A0A1S3E8K4_CICAR	107.57	14	14	531200	4	4	5	Oxidation (M)	47007	26S proteasome non-ATPase regulatory subunit 11 homolog OS=Cicer arietinum OX=3827 GN=LOC101513501 PE=3 SV=1	0.0133912
40	49	A0A1S2Y8C8|A0A1S2Y8C8_CICAR	102.92	12	12	1267100	4	3	4	Acetylation (Protein N-term)	44683	26S proteasome regulatory subunit 10B homolog A OS=Cicer arietinum OX=3827 GN=LOC101492658 PE=3 SV=1	0.0319427
56	78	A0A1S2XHQ9|A0A1S2XHQ9_CICAR	100.67	7	7	2234800	2	2	2	Pyro-glu from Q	49330	Elongation factor 1-alpha OS=Cicer arietinum OX=3827 GN=LOC101515489 PE=3 SV=1	0.0563378
53	72	sp|O65751|RSSA_CICAR	99.75	12	12	177320	2	1	2		33115	40S ribosomal protein SA OS=Cicer arietinum OX=3827 GN=RAP40 PE=2 SV=1	0.00447011
55	81	A0A1S2XB84|A0A1S2XB84_CICAR	84.63	5	5	6820400	2	2	3		44685	SNF1-related protein kinase regulatory subunit gamma-like PV42a OS=Cicer arietinum OX=3827 GN=LOC101511794 PE=4 SV=1	0.171938
47	69	A0A1S2XLI0|A0A1S2XLI0_CICAR	83	6	6	9550200	2	2	3		42569	alcohol dehydrogenase-like 7 isoform X1 OS=Cicer arietinum OX=3827 GN=LOC101510210 PE=3 SV=1	0.240754
54	67	A0A1S3DYR8|A0A1S3DYR8_CICAR	82.99	5	5	957360	2	2	2		69109	Isocitrate lyase OS=Cicer arietinum OX=3827 GN=LOC101513851 PE=4 SV=1	0.0241344
49	62	A0A1S2YPX2|A0A1S2YPX2_CICAR	79.42	5	5	2138800	2	2	2		45826	embryonic protein DC-8-like OS=Cicer arietinum OX=3827 GN=LOC101509550 PE=4 SV=1	0.0539177
57	76	A0A1S3EKM3|A0A1S3EKM3_CICAR	78.16	5	5	5084400	2	2	2		52560	Citrate synthase OS=Cicer arietinum OX=3827 GN=LOC101500149 PE=3 SV=1	0.128174
61	100	A0A1S2YP37|A0A1S2YP37_CICAR	77.8	5	5	1579300	2	2	2		71210	heat shock 70 kDa protein OS=Cicer arietinum OX=3827 GN=LOC101492688 PE=3 SV=1	0.0398131
59	68	A0A1S2XSG1|A0A1S2XSG1_CICAR	65.58	5	5	7492100	2	2	2	Carbamidomethylation; Acetylation (Protein N-term)	40675	S-(hydroxymethyl)glutathione dehydrogenase OS=Cicer arietinum OX=3827 GN=LOC101507053 PE=3 SV=1	0.188871

[truncated: 10 more sheets: 11, 12, 13, 14, 15, 16, 17, 18, 19, 20]
