# Supplementary material for: Mass Spectrometry Characterization of the SDS-PAGE Protein Profile of Legumins and Vicilins from Chickpea Seed
Source: Foods. 2024 Mar 14;13(6):887. doi: 10.3390/foods13060887 (PMC10969193; doi:10.3390/foods13060887)
Supplement: Supplementary file 1 [file foods-13-00887-s001.zip › Table S2.xlsx]

## Sheet: 1
Protein Group	Protein ID	Protein Accession	Peptide	Unique	-10lgP2	Mass	Length	ppm	m/z	z	RT	Area Sample	Fraction	Scan	Source File	#Feature	#Feature Sample 1	Start	End	PTM	AScore	Found By
1	5	A0A1S2Z626|A0A1S2Z626_CICAR	K.LGYDQQGENETYQR.T	Y	98.04	1699.74	14	5	850.88	2	35.39	15454000	1	10610	Banda_1_800.raw	1	1	616	629			PEAKS DB
1	5	A0A1S2Z626|A0A1S2Z626_CICAR	R.TAGETPSNQSSYTEK.I	Y	88.79	1598.71	15	17	800.362	2	28.76	14114000	1	7455	Banda_1_800.raw	1	1	630	644			PEAKS DB
1	5	A0A1S2Z626|A0A1S2Z626_CICAR	R.LEAYAISNYQTK.L	Y	77.92	1399.7	12	9	700.857	2	43.74	41072000	1	14606	Banda_1_800.raw	1	1	169	180			PEAKS DB
1	5	A0A1S2Z626|A0A1S2Z626_CICAR	K.IYSATSAIADK.A	Y	74.26	1138.59	11	-2	570.301	2	38.61	27598000	1	12198	Banda_1_800.raw	1	1	594	604			PEAKS DB
1	5	A0A1S2Z626|A0A1S2Z626_CICAR	K.ISSATSAVADK.A	Y	72.15	1048.54	11	1	525.277	2	30.7	35898000	1	8452	Banda_1_800.raw	2	2	688	698			PEAKS DB
1	5	A0A1S2Z626|A0A1S2Z626_CICAR	R.AGGAEIDITPIK.K	Y	71.37	1183.64	12	11	592.83	2	46.44	7630900	1	15989	Banda_1_800.raw	1	1	187	198			PEAKS DB
1	5	A0A1S2Z626|A0A1S2Z626_CICAR	R.NYSSAVSPAEYGK.R	Y	68.54	1371.63	13	12	686.823	2	36.03	25119000	1	10896	Banda_1_800.raw	1	1	747	759			PEAKS DB
1	5	A0A1S2Z626|A0A1S2Z626_CICAR	R.AGGAEIDITPIKK.S	Y	67.76	1311.74	13	8	656.878	2	52.54	36508000	1	18983	Banda_1_800.raw	2	2	187	199			PEAKS DB
1	5	A0A1S2Z626|A0A1S2Z626_CICAR	K.ISSATSAIADK.A	Y	67.04	1062.56	11	17	532.286	2	32.48	28872000	1	9769	Banda_1_800.raw	1	1	645	655			PEAKS DB
1	5	A0A1S2Z626|A0A1S2Z626_CICAR	R.EEFSTNNNQNTFR.V	Y	66.69	1599.69	13	13	800.854	2	38.12	1957900	1	11899	Banda_1_800.raw	1	1	561	573			PEAKS DB
1	5	A0A1S2Z626|A0A1S2Z626_CICAR	K.TPYPSSLPTSTYNQNSPQLSTEIK.T	Y	62.83	2652.29	24	11	885.106	3	45.52	12327000	1	15137	Banda_1_800.raw	1	1	242	265			PEAKS DB
1	5	A0A1S2Z626|A0A1S2Z626_CICAR	K.TNQNQSSYSEK.I	Y	61.4	1284.56	11	6	643.287	2	18.35	382590	1	3780	Banda_1_800.raw	1	1	677	687			PEAKS DB
1	5	A0A1S2Z626|A0A1S2Z626_CICAR	R.VEEQPQLHDESNQNNSYTDK.I	Y	60.64	2374.03	20	12	792.352	3	43.92	13019000	1	14788	Banda_1_800.raw	1	1	574	593			PEAKS DB
1	5	A0A1S2Z626|A0A1S2Z626_CICAR	K.LTPVSGNVGER.V	Y	59.08	1127.59	11	-1	564.804	2	34.34	35016000	1	10021	Banda_1_800.raw	1	1	769	779			PEAKS DB
1	5	A0A1S2Z626|A0A1S2Z626_CICAR	R.VVVVSPTTTEINQSMQHK.V	Y	52.71	1997.03	18	1	666.682	3	52.32	7446100	1	18403	Banda_1_800.raw	1	1	132	149			PEAKS DB
1	5	A0A1S2Z626|A0A1S2Z626_CICAR	K.LGYGEQGGNK.T	Y	52.53	1021.48	10	-24	511.748	2	31.88	1521000	1	9079	Banda_1_800.raw	1	1	667	676			PEAKS DB
1	5	A0A1S2Z626|A0A1S2Z626_CICAR	K.ALSDVISESLYEDDER.E	Y	52.52	1839.84	16	22	920.928	2	53.45	928760	1	19051	Banda_1_800.raw	1	1	808	823			PEAKS DB
1	5	A0A1S2Z626|A0A1S2Z626_CICAR	R.VVVVSPTTTEINQSM(+15.99)QHK.V	Y	52.49	2013.02	18	6	672.014	3	51.36	38655000	1	18197	Banda_1_800.raw	1	1	132	149	Oxidation (M)	M15:Oxidation (M):1000.00	PEAKS DB
1	5	A0A1S2Z626|A0A1S2Z626_CICAR	R.M(+15.99)SVQNEAK.T	Y	51.97	921.423	8	-7	461.718	2	18.45	7653100	1	3775	Banda_1_800.raw	2	2	204	211	Oxidation (M)	M1:Oxidation (M):1000.00	PEAKS DB
1	5	A0A1S2Z626|A0A1S2Z626_CICAR	K.VIESEEVK.K	Y	51.65	931.486	8	-5	466.75	2	31.86	23666000	1	8771	Banda_1_800.raw	1	1	835	842			PEAKS DB
1	5	A0A1S2Z626|A0A1S2Z626_CICAR	R.NVNFGGTR.V	Y	49.67	863.425	8	-16	432.719	2	36.86	44644000	1	10780	Banda_1_800.raw	2	2	113	120			PEAKS DB
1	5	A0A1S2Z626|A0A1S2Z626_CICAR	R.E(-18.01)EFSTNNNQNTFR.V	Y	46.24	1581.68	13	18	791.849	2	34.14	129470	1	9925	Banda_1_800.raw	1	1	561	573	Pyro-glu from E	E1:Pyro-glu from E:1000.00	PEAKS DB
1	5	A0A1S2Z626|A0A1S2Z626_CICAR	R.IAVSLTDK.L	Y	46.07	845.486	8	-3	423.75	2	41.15	23355000	1	13260	Banda_1_800.raw	1	1	761	768			PEAKS DB
1	4	A0A1S3DW19|A0A1S3DW19_CICAR	K.LGYDQQGENETYQR.T	Y	98.04	1699.74	14	5	850.88	2	35.39	15454000	1	10610	Banda_1_800.raw	1	1	616	629			PEAKS DB
1	4	A0A1S3DW19|A0A1S3DW19_CICAR	R.TAGETPSNQSSYTEK.I	Y	88.79	1598.71	15	17	800.362	2	28.76	14114000	1	7455	Banda_1_800.raw	1	1	630	644			PEAKS DB
1	4	A0A1S3DW19|A0A1S3DW19_CICAR	R.LEAYAISNYQTK.L	Y	77.92	1399.7	12	9	700.857	2	43.74	41072000	1	14606	Banda_1_800.raw	1	1	169	180			PEAKS DB
1	4	A0A1S3DW19|A0A1S3DW19_CICAR	K.IYSATSAIADK.A	Y	74.26	1138.59	11	-2	570.301	2	38.61	27598000	1	12198	Banda_1_800.raw	1	1	594	604			PEAKS DB
1	4	A0A1S3DW19|A0A1S3DW19_CICAR	K.ISSATSAVADK.A	Y	72.15	1048.54	11	1	525.277	2	30.7	35898000	1	8452	Banda_1_800.raw	2	2	688	698			PEAKS DB
1	4	A0A1S3DW19|A0A1S3DW19_CICAR	R.AGGAEIDITPIK.K	Y	71.37	1183.64	12	11	592.83	2	46.44	7630900	1	15989	Banda_1_800.raw	1	1	187	198			PEAKS DB
1	4	A0A1S3DW19|A0A1S3DW19_CICAR	R.NYSSAVSPAEYGK.R	Y	68.54	1371.63	13	12	686.823	2	36.03	25119000	1	10896	Banda_1_800.raw	1	1	747	759			PEAKS DB
1	4	A0A1S3DW19|A0A1S3DW19_CICAR	R.AGGAEIDITPIKK.S	Y	67.76	1311.74	13	8	656.878	2	52.54	36508000	1	18983	Banda_1_800.raw	2	2	187	199			PEAKS DB
1	4	A0A1S3DW19|A0A1S3DW19_CICAR	K.ISSATSAIADK.A	Y	67.04	1062.56	11	17	532.286	2	32.48	28872000	1	9769	Banda_1_800.raw	1	1	645	655			PEAKS DB
1	4	A0A1S3DW19|A0A1S3DW19_CICAR	R.EEFSTNNNQNTFR.V	Y	66.69	1599.69	13	13	800.854	2	38.12	1957900	1	11899	Banda_1_800.raw	1	1	561	573			PEAKS DB
1	4	A0A1S3DW19|A0A1S3DW19_CICAR	K.TPYPSSLPTSTYNQNSPQLSTEIK.T	Y	62.83	2652.29	24	11	885.106	3	45.52	12327000	1	15137	Banda_1_800.raw	1	1	242	265			PEAKS DB
1	4	A0A1S3DW19|A0A1S3DW19_CICAR	K.TNQNQSSYSEK.I	Y	61.4	1284.56	11	6	643.287	2	18.35	382590	1	3780	Banda_1_800.raw	1	1	677	687			PEAKS DB
1	4	A0A1S3DW19|A0A1S3DW19_CICAR	R.VEEQPQLHDESNQNNSYTDK.I	Y	60.64	2374.03	20	12	792.352	3	43.92	13019000	1	14788	Banda_1_800.raw	1	1	574	593			PEAKS DB
1	4	A0A1S3DW19|A0A1S3DW19_CICAR	K.LTPVSGNVGER.V	Y	59.08	1127.59	11	-1	564.804	2	34.34	35016000	1	10021	Banda_1_800.raw	1	1	769	779			PEAKS DB
1	4	A0A1S3DW19|A0A1S3DW19_CICAR	R.VVVVSPTTTEINQSMQHK.V	Y	52.71	1997.03	18	1	666.682	3	52.32	7446100	1	18403	Banda_1_800.raw	1	1	132	149			PEAKS DB
1	4	A0A1S3DW19|A0A1S3DW19_CICAR	K.LGYGEQGGNK.T	Y	52.53	1021.48	10	-24	511.748	2	31.88	1521000	1	9079	Banda_1_800.raw	1	1	667	676			PEAKS DB
1	4	A0A1S3DW19|A0A1S3DW19_CICAR	K.ALSDVISESLYEDDER.E	Y	52.52	1839.84	16	22	920.928	2	53.45	928760	1	19051	Banda_1_800.raw	1	1	808	823			PEAKS DB
1	4	A0A1S3DW19|A0A1S3DW19_CICAR	R.VVVVSPTTTEINQSM(+15.99)QHK.V	Y	52.49	2013.02	18	6	672.014	3	51.36	38655000	1	18197	Banda_1_800.raw	1	1	132	149	Oxidation (M)	M15:Oxidation (M):1000.00	PEAKS DB
1	4	A0A1S3DW19|A0A1S3DW19_CICAR	R.M(+15.99)SVQNEAK.T	Y	51.97	921.423	8	-7	461.718	2	18.45	7653100	1	3775	Banda_1_800.raw	2	2	204	211	Oxidation (M)	M1:Oxidation (M):1000.00	PEAKS DB
1	4	A0A1S3DW19|A0A1S3DW19_CICAR	K.VIESEEVK.K	Y	51.65	931.486	8	-5	466.75	2	31.86	23666000	1	8771	Banda_1_800.raw	1	1	835	842			PEAKS DB
1	4	A0A1S3DW19|A0A1S3DW19_CICAR	R.NVNFGGTR.V	Y	49.67	863.425	8	-16	432.719	2	36.86	44644000	1	10780	Banda_1_800.raw	2	2	113	120			PEAKS DB
1	4	A0A1S3DW19|A0A1S3DW19_CICAR	R.E(-18.01)EFSTNNNQNTFR.V	Y	46.24	1581.68	13	18	791.849	2	34.14	129470	1	9925	Banda_1_800.raw	1	1	561	573	Pyro-glu from E	E1:Pyro-glu from E:1000.00	PEAKS DB
1	4	A0A1S3DW19|A0A1S3DW19_CICAR	R.IAVSLTDK.L	Y	46.07	845.486	8	-3	423.75	2	41.15	23355000	1	13260	Banda_1_800.raw	1	1	761	768			PEAKS DB
5	7	A0A1S2XL88|A0A1S2XL88_CICAR	R.TANLANNQIINYR.C	N	84.08	1503.78	13	10	752.898	2	44.92	4324600	1	14948	Banda_1_800.raw	1	1	151	163			PEAKS DB
5	7	A0A1S2XL88|A0A1S2XL88_CICAR	K.LQQFQGAVDAAR.K	N	65.78	1302.67	12	9	652.342	2	40.96	5617400	1	13023	Banda_1_800.raw	1	1	1248	1259			PEAKS DB
5	7	A0A1S2XL88|A0A1S2XL88_CICAR	R.ADDATQFLDVIR.A	N	61.38	1362.68	12	13	682.347	2	54.09	3127100	1	19383	Banda_1_800.raw	1	1	1145	1156			PEAKS DB
5	7	A0A1S2XL88|A0A1S2XL88_CICAR	R.ESIDLYDNFDQIGLAQK.I	Y	59.68	1967.95	17	8	984.982	2	53.58	1538900	1	19329	Banda_1_800.raw	1	1	1496	1512			PEAKS DB
5	7	A0A1S2XL88|A0A1S2XL88_CICAR	K.VPGNENPSVLISFASK.T	Y	57.81	1657.87	16	8	829.942	2	53.28	3902900	1	18944	Banda_1_800.raw	1	1	216	231			PEAKS DB
5	7	A0A1S2XL88|A0A1S2XL88_CICAR	R.VEEDAVWSQVAK.A	N	55.59	1359.67	12	3	680.841	2	47.46	4535800	1	16117	Banda_1_800.raw	1	1	1116	1127			PEAKS DB
5	7	A0A1S2XL88|A0A1S2XL88_CICAR	K.VANVELYYK.A	N	54.36	1097.58	9	1	549.795	2	47.04	6137100	1	15971	Banda_1_800.raw	1	1	1412	1420			PEAKS DB
5	7	A0A1S2XL88|A0A1S2XL88_CICAR	K.DAM(+15.99)ETASQSGER.E	N	50.86	1296.53	12	-2	649.27	2	18.35	116960	1	3787	Banda_1_800.raw	1	1	1550	1561	Oxidation (M)	M3:Oxidation (M):1000.00	PEAKS DB
5	7	A0A1S2XL88|A0A1S2XL88_CICAR	R.LYDEALYEAAK.I	Y	49.85	1284.62	11	1	643.319	2	48.91	3960900	1	16811	Banda_1_800.raw	1	1	1219	1229			PEAKS DB
5	7	A0A1S2XL88|A0A1S2XL88_CICAR	K.YSLIYVITK.L	N	49.6	1098.63	9	-22	550.322	2	54.93	2818400	1	19890	Banda_1_800.raw	1	1	283	291			PEAKS DB
5	7	A0A1S2XL88|A0A1S2XL88_CICAR	K.EAAELAAESPQGILR.T	N	49.33	1553.8	15	5	777.91	2	48.82	1177500	1	16922	Banda_1_800.raw	1	1	392	406			PEAKS DB
5	7	A0A1S2XL88|A0A1S2XL88_CICAR	S.SPEQVSAAVK.A	N	47.08	1014.53	10	3	508.275	2	31.67	3373800	1	8728	Banda_1_800.raw	1	1	998	1007			PEAKS DB
5	7	A0A1S2XL88|A0A1S2XL88_CICAR	R.RPITADSALM(+15.99)NPNSR.I	N	46.72	1657.82	15	6	553.614	3	52.32	1229800	1	18425	Banda_1_800.raw	1	1	64	78	Oxidation (M)	M10:Oxidation (M):1000.00	PEAKS DB
6	9	A0A1S2YJU0|A0A1S2YJU0_CICAR	R.LNEEVGSVQAAASQR.E	Y	81.6	1557.77	15	12	779.896	2	35.8	1920500	1	10375	Banda_1_800.raw	1	1	1168	1182			PEAKS DB
6	9	A0A1S2YJU0|A0A1S2YJU0_CICAR	K.SQEAQFLSAQEELTK.L	Y	65.44	1707.83	15	22	854.925	2	47.88	1841500	1	16458	Banda_1_800.raw	1	1	374	388			PEAKS DB
6	9	A0A1S2YJU0|A0A1S2YJU0_CICAR	K.ELQLAQATIANQK.G	Y	59.79	1426.78	13	10	714.397	2	44.15	1503500	1	14917	Banda_1_800.raw	1	1	1213	1225			PEAKS DB
6	9	A0A1S2YJU0|A0A1S2YJU0_CICAR	M(+15.99)(+42.01)EETAAISEVTVTK.V	Y	58.52	1565.75	14	13	783.883	2	37.49	126300	1	11474	Banda_1_800.raw	1	1	1	14	Oxidation (M); Acetylation (Protein N-term)	M1:Oxidation (M):1000.00;M1:Acetylation (Protein N-term):1000.00	PEAKS DB
6	9	A0A1S2YJU0|A0A1S2YJU0_CICAR	K.TTAAELSTIQEELTLSK.T	Y	53.29	1833.96	17	26	917.988	2	53.53	956080	1	19158	Banda_1_800.raw	1	1	276	292			PEAKS DB
6	9	A0A1S2YJU0|A0A1S2YJU0_CICAR	R.TQELESELQLSIDEAR.K	Y	52.67	1859.91	16	2	930.963	2	52.81	773650	1	19235	Banda_1_800.raw	1	1	194	209			PEAKS DB
6	9	A0A1S2YJU0|A0A1S2YJU0_CICAR	R.VSELELLLETEK.Y	Y	52.66	1401.76	12	8	701.888	2	55.03	982230	1	19964	Banda_1_800.raw	1	1	621	632			PEAKS DB
6	9	A0A1S2YJU0|A0A1S2YJU0_CICAR	R.LEETVEDLTINVK.Q	Y	51.48	1501.79	13	15	751.902	2	50.75	2006900	1	17824	Banda_1_800.raw	1	1	393	405			PEAKS DB
6	9	A0A1S2YJU0|A0A1S2YJU0_CICAR	K.ELSTDLEEK.L	Y	51.27	1062.51	9	19	532.262	2	37.08	3785100	1	11537	Banda_1_800.raw	1	1	409	417			PEAKS DB
6	9	A0A1S2YJU0|A0A1S2YJU0_CICAR	R.DVNFSAPSK.R	Y	50.28	963.466	9	3	482.74	2	33.45	3780100	1	9522	Banda_1_800.raw	1	1	1293	1301			PEAKS DB
6	9	A0A1S2YJU0|A0A1S2YJU0_CICAR	K.DSEVQSLLEK.I	Y	48.36	1146.58	10	2	574.296	2	48.18	2231900	1	16729	Banda_1_800.raw	1	1	811	820			PEAKS DB
6	9	A0A1S2YJU0|A0A1S2YJU0_CICAR	K.LQEQIVEAENK.Y	Y	46.11	1299.67	11	8	650.841	2	35.25	813090	1	10641	Banda_1_800.raw	1	1	141	151			PEAKS DB
6	9	A0A1S2YJU0|A0A1S2YJU0_CICAR	R.TSSLETTLQAANER.E	Y	45.22	1519.75	14	17	760.882	2	45.28	1757200	1	15312	Banda_1_800.raw	1	1	677	690			PEAKS DB
8	13	A0A1S2Y8W1|A0A1S2Y8W1_CICAR	R.TANLANNQIINYR.C	N	84.08	1503.78	13	10	752.898	2	44.92	4324600	1	14948	Banda_1_800.raw	1	1	151	163			PEAKS DB
8	13	A0A1S2Y8W1|A0A1S2Y8W1_CICAR	R.ADDATQFLDVIR.A	N	61.38	1362.68	12	13	682.347	2	54.09	3127100	1	19383	Banda_1_800.raw	1	1	1145	1156			PEAKS DB
8	13	A0A1S2Y8W1|A0A1S2Y8W1_CICAR	R.VEEDAVWSQVAK.A	N	55.59	1359.67	12	3	680.841	2	47.46	4535800	1	16117	Banda_1_800.raw	1	1	1116	1127			PEAKS DB
8	13	A0A1S2Y8W1|A0A1S2Y8W1_CICAR	R.AAEDGNAYQDLVR.Y	Y	55.41	1420.66	13	1	711.336	2	42.87	1140600	1	14199	Banda_1_800.raw	1	1	1157	1169			PEAKS DB
8	13	A0A1S2Y8W1|A0A1S2Y8W1_CICAR	K.VANVELYYK.A	N	54.36	1097.58	9	1	549.795	2	47.04	6137100	1	15971	Banda_1_800.raw	1	1	1412	1420			PEAKS DB
8	13	A0A1S2Y8W1|A0A1S2Y8W1_CICAR	K.VPGNENPSTLISFATK.T	Y	53.88	1673.86	16	3	837.939	2	52.99	1545900	1	18770	Banda_1_800.raw	1	1	216	231			PEAKS DB
8	13	A0A1S2Y8W1|A0A1S2Y8W1_CICAR	K.DAM(+15.99)ETASQSGER.E	N	50.86	1296.53	12	-2	649.27	2	18.35	116960	1	3787	Banda_1_800.raw	1	1	1550	1561	Oxidation (M)	M3:Oxidation (M):1000.00	PEAKS DB
8	13	A0A1S2Y8W1|A0A1S2Y8W1_CICAR	K.YSLIYVITK.L	N	49.6	1098.63	9	-22	550.322	2	54.93	2818400	1	19890	Banda_1_800.raw	1	1	283	291			PEAKS DB
8	13	A0A1S2Y8W1|A0A1S2Y8W1_CICAR	R.QLIDQVVSTALPESK.S	N	49.4	1626.88	15	19	814.45	2	51.65	14713	1	18355	Banda_1_800.raw	1	1	983	997			PEAKS DB
8	13	A0A1S2Y8W1|A0A1S2Y8W1_CICAR	K.EAAELAAESPQGILR.T	N	49.33	1553.8	15	5	777.91	2	48.82	1177500	1	16922	Banda_1_800.raw	1	1	392	406			PEAKS DB
8	13	A0A1S2Y8W1|A0A1S2Y8W1_CICAR	K.SPEQVSAAVK.A	N	47.08	1014.53	10	3	508.275	2	31.67	3373800	1	8728	Banda_1_800.raw	1	1	998	1007			PEAKS DB
8	13	A0A1S2Y8W1|A0A1S2Y8W1_CICAR	R.RPITADSALM(+15.99)NPNSR.I	N	46.72	1657.82	15	6	553.614	3	52.32	1229800	1	18425	Banda_1_800.raw	1	1	64	78	Oxidation (M)	M10:Oxidation (M):1000.00	PEAKS DB
9	11	A0A1S2XQR4|A0A1S2XQR4_CICAR	K.EVAFPGSAEEVDR.L	N	80.55	1404.65	13	13	703.334	2	44.14	13236000	1	14673	Banda_1_800.raw	1	1	407	419			PEAKS DB
9	11	A0A1S2XQR4|A0A1S2XQR4_CICAR	K.ILEASFNSDYEEIER.V	N	74.83	1813.84	15	14	907.927	2	52.12	7340700	1	18491	Banda_1_800.raw	2	2	176	190			PEAKS DB
9	11	A0A1S2XQR4|A0A1S2XQR4_CICAR	R.ATVILVVNEGK.G	N	60.38	1141.67	11	-23	571.841	2	46.53	7890600	1	16165	Banda_1_800.raw	2	2	303	313			PEAKS DB
9	11	A0A1S2XQR4|A0A1S2XQR4_CICAR	R.Q(-17.03)EADVIVK.I	N	52.7	883.465	8	4	884.473	1	32.51	957570	1	9436	Banda_1_800.raw	1	1	215	222	Pyro-glu from Q	Q1:Pyro-glu from Q:1000.00	PEAKS DB
9	11	A0A1S2XQR4|A0A1S2XQR4_CICAR	R.SVSSESEPFNLR.S	N	50.74	1350.64	12	12	676.329	2	48.21	11405000	1	16830	Banda_1_800.raw	1	1	242	253			PEAKS DB
9	11	A0A1S2XQR4|A0A1S2XQR4_CICAR	F.SLSGSENQQSYFQGFSK.K	Y	49.18	1892.85	17	16	947.436	2	48.72	1216900	1	16696	Banda_1_800.raw	1	1	158	174			PEAKS DB
9	11	A0A1S2XQR4|A0A1S2XQR4_CICAR	R.Q(-17.03)SHFANAQPQQK.D	N	49.13	1365.64	12	10	683.829	2	31.31	3039500	1	8858	Banda_1_800.raw	1	1	426	437	Pyro-glu from Q	Q1:Pyro-glu from Q:1000.00	PEAKS DB
9	11	A0A1S2XQR4|A0A1S2XQR4_CICAR	K.YGNFFEITPEK.N	N	48.6	1343.64	11	16	672.828	2	53.9	2714200	1	19423	Banda_1_800.raw	1	1	263	273			PEAKS DB
9	11	A0A1S2XQR4|A0A1S2XQR4_CICAR	K.KILEASFNSDYEEIER.V	N	48.08	1941.93	16	14	648.319	3	53.9	1139300	1	19395	Banda_1_800.raw	1	1	175	190			PEAKS DB
9	11	A0A1S2XQR4|A0A1S2XQR4_CICAR	R.AILTVLNPNDR.N	N	45.43	1224.68	11	5	613.349	2	53.31	9458800	1	18925	Banda_1_800.raw	1	1	99	109			PEAKS DB
10	12	A0A1S2XQ88|A0A1S2XQ88_CICAR	K.EVAFPGSAEEVDR.L	N	80.55	1404.65	13	13	703.334	2	44.14	13236000	1	14673	Banda_1_800.raw	1	1	405	417			PEAKS DB
10	12	A0A1S2XQ88|A0A1S2XQ88_CICAR	K.ILEASFNSDYEEIER.V	N	74.83	1813.84	15	14	907.927	2	52.12	7340700	1	18491	Banda_1_800.raw	2	2	176	190			PEAKS DB
10	12	A0A1S2XQ88|A0A1S2XQ88_CICAR	R.ATVILVVNEGK.G	N	60.38	1141.67	11	-23	571.841	2	46.53	7890600	1	16165	Banda_1_800.raw	2	2	301	311			PEAKS DB
10	12	A0A1S2XQ88|A0A1S2XQ88_CICAR	R.QQSQETDVIVK.I	Y	56.63	1273.65	11	-3	637.833	2	32.8	2139300	1	9560	Banda_1_800.raw	1	1	210	220			PEAKS DB
10	12	A0A1S2XQ88|A0A1S2XQ88_CICAR	K.SVSSESEPFNLR.S	N	50.74	1350.64	12	12	676.329	2	48.21	11405000	1	16830	Banda_1_800.raw	1	1	240	251			PEAKS DB
10	12	A0A1S2XQ88|A0A1S2XQ88_CICAR	R.Q(-17.03)SHFANAQPQQK.R	N	49.13	1365.64	12	10	683.829	2	31.31	3039500	1	8858	Banda_1_800.raw	1	1	424	435	Pyro-glu from Q	Q1:Pyro-glu from Q:1000.00	PEAKS DB
10	12	A0A1S2XQ88|A0A1S2XQ88_CICAR	K.KILEASFNSDYEEIER.V	N	48.08	1941.93	16	14	648.319	3	53.9	1139300	1	19395	Banda_1_800.raw	1	1	175	190			PEAKS DB
10	12	A0A1S2XQ88|A0A1S2XQ88_CICAR	R.AILTVLNPNDR.N	N	45.43	1224.68	11	5	613.349	2	53.31	9458800	1	18925	Banda_1_800.raw	1	1	99	109			PEAKS DB
12	8	A0A3Q7YAD4|A0A3Q7YAD4_CICAR	K.SNLDPTIYGDQTSK.I	Y	76.58	1537.73	14	11	769.871	2	38.14	656800	1	12083	Banda_1_800.raw	1	1	391	404			PEAKS DB
12	8	A0A3Q7YAD4|A0A3Q7YAD4_CICAR	M(+15.99)(+42.01)FSGVTGILNK.G	Y	64.33	1223.62	11	6	612.819	2	46.03	3707200	1	15767	Banda_1_800.raw	1	1	1	11	Oxidation (M); Acetylation (Protein N-term)	M1:Oxidation (M):1000.00;M1:Acetylation (Protein N-term):1000.00	PEAKS DB
12	8	A0A3Q7YAD4|A0A3Q7YAD4_CICAR	R.SVSLQLISATK.S	N	62.1	1145.67	11	2	573.84	2	52.35	11889000	1	18603	Banda_1_800.raw	1	1	65	75			PEAKS DB
12	8	A0A3Q7YAD4|A0A3Q7YAD4_CICAR	K.LPLDVISTISPLPVIK.E	Y	61.3	1704.04	16	15	853.03	2	56.75	2431100	1	20658	Banda_1_800.raw	1	1	321	336			PEAKS DB
12	8	A0A3Q7YAD4|A0A3Q7YAD4_CICAR	K.TYLPSETPSPLVK.Y	Y	60.23	1430.77	13	14	716.391	2	48.55	6526800	1	16609	Banda_1_800.raw	1	1	170	182			PEAKS DB
12	8	A0A3Q7YAD4|A0A3Q7YAD4_CICAR	K.YGVEM(+15.99)SSAVYK.N	Y	57.89	1248.57	11	11	625.293	2	34.41	1268300	1	10695	Banda_1_800.raw	1	1	583	593	Oxidation (M)	M5:Oxidation (M):1000.00	PEAKS DB
12	8	A0A3Q7YAD4|A0A3Q7YAD4_CICAR	R.QSLINADGIIEK.T	Y	56.58	1299.7	12	11	650.86	2	49.47	287300	1	17091	Banda_1_800.raw	1	1	565	576			PEAKS DB
12	8	A0A3Q7YAD4|A0A3Q7YAD4_CICAR	R.DTM(+15.99)NINALAR.Q	N	52	1133.55	10	11	567.783	2	35.36	8579200	1	10684	Banda_1_800.raw	1	1	555	564	Oxidation (M)	M3:Oxidation (M):1000.00	PEAKS DB
12	8	A0A3Q7YAD4|A0A3Q7YAD4_CICAR	M(+42.01)FSGVTGILNK.G	Y	50.63	1207.63	11	17	604.822	2	56.04	38230	1	20450	Banda_1_800.raw	1	1	1	11	Acetylation (Protein N-term)	M1:Acetylation (Protein N-term):1000.00	PEAKS DB
13	17	A0A1S2YTB3|A0A1S2YTB3_CICAR	R.NAAANIDQQVVDAPK.A	Y	87.96	1552.78	15	6	777.4	2	38.74	3146300	1	12159	Banda_1_800.raw	1	1	393	407			PEAKS DB
13	17	A0A1S2YTB3|A0A1S2YTB3_CICAR	R.ETVLQLNAPPK.L	Y	57.33	1208.68	11	3	605.346	2	45.13	1868800	1	15391	Banda_1_800.raw	1	1	1238	1248			PEAKS DB
13	17	A0A1S2YTB3|A0A1S2YTB3_CICAR	R.AGSAASLSTLLNR.L	Y	55.74	1259.68	13	-7	630.848	2	52.54	1370300	1	18819	Banda_1_800.raw	1	1	993	1005			PEAKS DB
13	17	A0A1S2YTB3|A0A1S2YTB3_CICAR	R.GYEELNNAGPEK.L	Y	55.23	1319.6	12	2	660.807	2	32.8	2268400	1	9462	Banda_1_800.raw	1	1	885	896			PEAKS DB
13	17	A0A1S2YTB3|A0A1S2YTB3_CICAR	K.Q(-17.03)SYNPEQEKEEYEAAR.R	Y	50.12	1952.84	16	22	977.429	2	36.33	483260	1	10972	Banda_1_800.raw	1	1	235	250	Pyro-glu from Q	Q1:Pyro-glu from Q:1000.00	PEAKS DB
11	16	Q304D4|Q304D4_CICAR	K.EVAFPGSAEEVDR.L	N	80.55	1404.65	13	13	703.334	2	44.14	13236000	1	14673	Banda_1_800.raw	1	1	405	417			PEAKS DB
11	16	Q304D4|Q304D4_CICAR	R.QQSQSQSQQEADVIVK.I	Y	72.15	1801.88	16	25	901.95	2	30.65	23900	1	8439	Banda_1_800.raw	1	1	205	220			PEAKS DB
11	16	Q304D4|Q304D4_CICAR	R.Q(-17.03)QSQSQSQQEADVIVK.I	Y	64.63	1784.85	16	13	893.435	2	30.52	13900	1	8327	Banda_1_800.raw	1	1	205	220	Pyro-glu from Q	Q1:Pyro-glu from Q:1000.00	PEAKS DB
11	16	Q304D4|Q304D4_CICAR	R.ATVILVVNEGK.G	N	60.38	1141.67	11	-23	571.841	2	46.53	7890600	1	16165	Banda_1_800.raw	2	2	301	311			PEAKS DB
11	16	Q304D4|Q304D4_CICAR	Q.Q(-17.03)EADVIVK.I	N	52.7	883.465	8	4	884.473	1	32.51	957570	1	9436	Banda_1_800.raw	1	1	213	220	Pyro-glu from Q	Q1:Pyro-glu from Q:1000.00	PEAKS DB
11	16	Q304D4|Q304D4_CICAR	K.SVSSESEPFNLR.S	N	50.74	1350.64	12	12	676.329	2	48.21	11405000	1	16830	Banda_1_800.raw	1	1	240	251			PEAKS DB
11	16	Q304D4|Q304D4_CICAR	R.Q(-17.03)SHFANAQPQQK.D	N	49.13	1365.64	12	10	683.829	2	31.31	3039500	1	8858	Banda_1_800.raw	1	1	424	435	Pyro-glu from Q	Q1:Pyro-glu from Q:1000.00	PEAKS DB
11	16	Q304D4|Q304D4_CICAR	K.YGNFFEITPEK.N	N	48.6	1343.64	11	16	672.828	2	53.9	2714200	1	19423	Banda_1_800.raw	1	1	261	271			PEAKS DB
15	15	A0A1S2XBN2|A0A1S2XBN2_CICAR	M(+15.99)(+42.01)FSGVTGLLNR.G	Y	73.99	1251.63	11	8	626.822	2	48.89	3089200	1	16812	Banda_1_800.raw	1	1	1	11	Oxidation (M); Acetylation (Protein N-term)	M1:Oxidation (M):1000.00;M1:Acetylation (Protein N-term):1000.00	PEAKS DB
15	15	A0A1S2XBN2|A0A1S2XBN2_CICAR	R.QSLVNDGGIIEK.T	Y	62.32	1271.67	12	19	636.845	2	43.96	3189100	1	14669	Banda_1_800.raw	1	1	567	578			PEAKS DB
15	15	A0A1S2XBN2|A0A1S2XBN2_CICAR	R.SVSLQLISATK.S	N	62.1	1145.67	11	2	573.84	2	52.35	11889000	1	18603	Banda_1_800.raw	1	1	60	70			PEAKS DB
15	15	A0A1S2XBN2|A0A1S2XBN2_CICAR	R.DTM(+15.99)NINALAR.Q	N	52	1133.55	10	11	567.783	2	35.36	8579200	1	10684	Banda_1_800.raw	1	1	557	566	Oxidation (M)	M3:Oxidation (M):1000.00	PEAKS DB
15	15	A0A1S2XBN2|A0A1S2XBN2_CICAR	R.SDFVYLPR.D	Y	48.91	995.508	8	2	498.761	2	53.21	4042600	1	19014	Banda_1_800.raw	1	1	256	263			PEAKS DB
20	21	sp|Q9SMJ4|LEG_CICAR	R.YQQEGSEEEENEGGNIFSGFK.R	Y	81.41	2377	21	-2	1189.51	2	52.2	2293400	1	18478	Banda_1_800.raw	1	1	194	214			PEAKS DB
20	21	sp|Q9SMJ4|LEG_CICAR	K.GNSVFDGELEAGR.A	N	66.07	1349.62	13	7	675.818	2	47.04	0	1	16112	Banda_1_800.raw	0	0	400	412			PEAKS DB
20	21	sp|Q9SMJ4|LEG_CICAR	R.LHQNIGSSSSPDIYNPQAGR.I	N	55.21	2140.03	20	4	714.351	3	52.17	6400400	1	18310	Banda_1_800.raw	1	1	322	341			PEAKS DB
20	21	sp|Q9SMJ4|LEG_CICAR	K.SEGGLIETWNPSNK.Q	N	51.42	1530.73	14	4	766.373	2	51.07	47900	1	17813	Banda_1_800.raw	1	1	47	60			PEAKS DB
20	21	sp|Q9SMJ4|LEG_CICAR	N.GFEETIC(+57.02)TAR.L	N	48.86	1182.53	10	17	592.275	2	44.2	13918000	1	14808	Banda_1_800.raw	1	1	312	321	Carbamidomethylation	C7:Carbamidomethylation:1000.00	PEAKS DB
22	23	A0A1S2XSB9|A0A1S2XSB9_CICAR	R.IESEGGLIETWNPNNR.Q	Y	76.11	1827.88	16	11	914.946	2	52.22	947780	1	18762	Banda_1_800.raw	1	1	45	60			PEAKS DB
22	23	A0A1S2XSB9|A0A1S2XSB9_CICAR	K.TVTSFDLPALR.W	N	70.15	1218.66	11	0	610.338	2	53.95	14063000	1	19265	Banda_1_800.raw	1	1	366	376			PEAKS DB
22	23	A0A1S2XSB9|A0A1S2XSB9_CICAR	R.LHQNIDSSSSPDIYIPQAGR.I	Y	56.19	2197.08	20	19	1099.55	2	52.89	4751100	1	18745	Banda_1_800.raw	2	2	344	363			PEAKS DB
22	23	A0A1S2XSB9|A0A1S2XSB9_CICAR	N.GFEETIC(+57.02)TAR.L	N	48.86	1182.53	10	17	592.275	2	44.2	13918000	1	14808	Banda_1_800.raw	1	1	334	343	Carbamidomethylation	C7:Carbamidomethylation:1000.00	PEAKS DB
22	23	A0A1S2XSB9|A0A1S2XSB9_CICAR	K.GGLSFISPSEK.Q	Y	45.56	1120.58	11	-6	561.295	2	51.5	6189400	1	18402	Banda_1_800.raw	1	1	251	261			PEAKS DB
21	22	A0A1S2Y087|A0A1S2Y087_CICAR	R.NFLAGEDDNVISQIQNPVK.E	Y	66.51	2100.05	19	4	1051.03	2	53.16	1496300	1	19264	Banda_1_800.raw	1	1	525	543			PEAKS DB
21	22	A0A1S2Y087|A0A1S2Y087_CICAR	R.VLLEEQEPEQSR.G	Y	62.2	1455.72	12	11	728.868	2	39.52	8381400	1	12650	Banda_1_800.raw	1	1	331	342			PEAKS DB
21	22	A0A1S2Y087|A0A1S2Y087_CICAR	K.SILEASFNTK.Y	Y	54.6	1108.58	10	1	555.295	2	52.54	4285500	1	18538	Banda_1_800.raw	1	1	315	324			PEAKS DB
21	22	A0A1S2Y087|A0A1S2Y087_CICAR	K.ELTFPGSAQEVNR.L	Y	54.06	1446.71	13	15	724.364	2	47.12	3743700	1	15920	Banda_1_800.raw	1	1	544	556			PEAKS DB
21	22	A0A1S2Y087|A0A1S2Y087_CICAR	K.AILTVLNPNDR.N	N	45.43	1224.68	11	5	613.349	2	53.31	9458800	1	18925	Banda_1_800.raw	1	1	239	249			PEAKS DB
27	27	A0A1S2XYZ0|A0A1S2XYZ0_CICAR	R.IVDLAIPINTPAK.F	Y	64.41	1363.81	13	-6	682.911	2	53.08	3613100	1	18807	Banda_1_800.raw	1	1	266	278			PEAKS DB
27	27	A0A1S2XYZ0|A0A1S2XYZ0_CICAR	R.Q(-17.03)QSQEAEVIVK.V	Y	62.57	1240.63	11	-4	621.322	2	31.47	1199600	1	8946	Banda_1_800.raw	1	1	331	341	Pyro-glu from Q	Q1:Pyro-glu from Q:1000.00	PEAKS DB
27	27	A0A1S2XYZ0|A0A1S2XYZ0_CICAR	K.ELAFPGSAQEVDR.L	Y	61.05	1417.68	13	13	709.85	2	48.13	1573200	1	16708	Banda_1_800.raw	1	1	514	526			PEAKS DB
25	31	A0A1S2XV08|A0A1S2XV08_CICAR	R.Q(-17.03)LEENLLLFDLVESK.L	Y	57.42	1771.92	15	9	886.97	2	62.17	417750	1	23303	Banda_1_800.raw	1	1	402	416	Pyro-glu from Q	Q1:Pyro-glu from Q:1000.00	PEAKS DB
25	31	A0A1S2XV08|A0A1S2XV08_CICAR	K.NNPNILNNLIYTPLTITPEGEYR.M	Y	52.75	2658.37	23	-1	1330.19	2	56.09	237720	1	20452	Banda_1_800.raw	1	1	246	268			PEAKS DB
25	31	A0A1S2XV08|A0A1S2XV08_CICAR	K.EAQVNAVGPFGLC(+57.02)FDSK.R	Y	49.12	1837.87	17	15	919.942	2	53.93	884070	1	19374	Banda_1_800.raw	1	1	330	346	Carbamidomethylation	C13:Carbamidomethylation:1000.00	PEAKS DB
26	33	A0A1S2XVM2|A0A1S2XVM2_CICAR	K.EGSSIINTTSVNAYK.G	Y	51.95	1582.78	15	11	792.4	2	42.23	2664800	1	13805	Banda_1_800.raw	1	1	206	220			PEAKS DB
26	33	A0A1S2XVM2|A0A1S2XVM2_CICAR	R.VVDEIINTYGR.I	Y	51.35	1277.66	11	4	639.838	2	48.68	3289100	1	17022	Banda_1_800.raw	1	1	147	157			PEAKS DB
26	33	A0A1S2XVM2|A0A1S2XVM2_CICAR	R.IDILVNNAAEQYEC(+57.02)GSIEEIDEPR.L	Y	48.35	2776.29	24	18	926.438	3	53.21	1748700	1	18871	Banda_1_800.raw	1	1	158	181	Carbamidomethylation	C14:Carbamidomethylation:1000.00	PEAKS DB
35	43	A0A1S2Y2Z0|A0A1S2Y2Z0_CICAR	K.EGVIQHSTINNLAIGR.S	Y	68.49	1720.92	16	5	574.648	3	53.37	1140700	1	19184	Banda_1_800.raw	1	1	202	217			PEAKS DB
35	43	A0A1S2Y2Z0|A0A1S2Y2Z0_CICAR	K.SYGVLIPDQGIALR.G	Y	53.99	1500.83	14	9	751.423	2	54.04	4353900	1	19338	Banda_1_800.raw	1	1	181	194			PEAKS DB
35	45	A0A1S2XVC1|A0A1S2XVC1_CICAR	K.EGVIQHSTINNLAIGR.S	Y	68.49	1720.92	16	5	574.648	3	53.37	1140700	1	19184	Banda_1_800.raw	1	1	214	229			PEAKS DB
35	45	A0A1S2XVC1|A0A1S2XVC1_CICAR	K.SYGVLIPDQGIALR.G	Y	53.99	1500.83	14	9	751.423	2	54.04	4353900	1	19338	Banda_1_800.raw	1	1	193	206			PEAKS DB

## Sheet: 2
Protein ID	Protein Accession	Peptide	Unique	Score	Mass	Length	ppm	m/z	z	RT	Area Sample	Fraction	Scan	Source File	#Feature	#Feature Sample 1	Start	End	PTM	AScore	Found By
1	A0A1S2XHJ1|A0A1S2XHJ1_CICAR	K.LENVANQEPDAALGNGGLGR.L	Y	94.52	1993.98	20	12	997.999	2	43.66		1	13363	Banda_2_803.raw	0	0	191	210			PEAKS DB
1	A0A1S2XHJ1|A0A1S2XHJ1_CICAR	R.TIIAEYGTADSDLLEK.K	Y	93.04	1737.87	16	8	869.942	2	52.1	56365000	1	17279	Banda_2_803.raw	2	2	482	497			PEAKS DB
1	A0A1S2XHJ1|A0A1S2XHJ1_CICAR	K.FELPQAYTATAQSVR.D	Y	90.25	1680.85	15	11	841.432	2	52.91	31736000	1	17353	Banda_2_803.raw	2	2	118	132			PEAKS DB
1	A0A1S2XHJ1|A0A1S2XHJ1_CICAR	K.KEELPEPVPEPPK.L	Y	89.7	1487.79	13	12	744.902	2	54.44	5787000	1	18493	Banda_2_803.raw	2	2	572	584			PEAKS DB
1	A0A1S2XHJ1|A0A1S2XHJ1_CICAR	K.AASEDFDLYAFNSGK.H	Y	85.72	1633.73	15	9	817.871	2	54	43047000	1	17961	Banda_2_803.raw	1	1	321	335			PEAKS DB
1	A0A1S2XHJ1|A0A1S2XHJ1_CICAR	R.EEVGADNFFLFGAK.A	Y	84.16	1542.74	14	-52	772.371	2	57.37	25755000	1	19790	Banda_2_803.raw	3	3	853	866			PEAKS DB
1	A0A1S2XHJ1|A0A1S2XHJ1_CICAR	K.HVEAYEALANAEK.I	Y	82.9	1443.7	13	7	722.857	2	55.29	25281000	1	19097	Banda_2_803.raw	2	2	336	348			PEAKS DB
1	A0A1S2XHJ1|A0A1S2XHJ1_CICAR	K.IITQWIGTEDWVLNTEK.L	Y	81.77	2045.05	17	-49	1023.53	2	57.26	616120	1	19800	Banda_2_803.raw	2	2	649	665			PEAKS DB
1	A0A1S2XHJ1|A0A1S2XHJ1_CICAR	R.SGAFGSYNYDELIGSLEGNEGFGR.A	Y	78.62	2538.13	24	6	1270.07	2	56.78	525870	1	19498	Banda_2_803.raw	1	1	897	920			PEAKS DB
1	A0A1S2XHJ1|A0A1S2XHJ1_CICAR	R.SGASVNWEEFPVK.V	Y	75.78	1448.69	13	8	725.355	2	54.3	29913000	1	18215	Banda_2_803.raw	1	1	389	401			PEAKS DB
1	A0A1S2XHJ1|A0A1S2XHJ1_CICAR	K.TGYSVSPDAM(+15.99)FDIQVK.R	Y	75.45	1772.83	16	0	887.422	2	50.06	20027000	1	16380	Banda_2_803.raw	1	1	701	716	Oxidation (M)	M10:Oxidation (M):1000.00	PEAKS DB
1	A0A1S2XHJ1|A0A1S2XHJ1_CICAR	K.IC(+57.02)YVLYPGDESIEGK.T	Y	75.43	1741.82	15	7	871.919	2	54.15	8418400	1	18238	Banda_2_803.raw	1	1	349	363	Carbamidomethylation	C2:Carbamidomethylation:1000.00	PEAKS DB
1	A0A1S2XHJ1|A0A1S2XHJ1_CICAR	R.AVAHDVPIPGYK.T	Y	73.1	1265.68	12	2	633.846	2	55.04	16237000	1	18418	Banda_2_803.raw	1	1	296	307			PEAKS DB
1	A0A1S2XHJ1|A0A1S2XHJ1_CICAR	R.TVAYTNHTVLPEALEK.W	Y	66.45	1784.93	16	5	893.473	2	55.41	40546000	1	18606	Banda_2_803.raw	2	2	440	455			PEAKS DB
1	A0A1S2XHJ1|A0A1S2XHJ1_CICAR	K.AFATYVQAK.R	N	64.23	997.523	9	13	499.769	2	44.4	68668000	1	13551	Banda_2_803.raw	1	1	761	769			PEAKS DB
1	A0A1S2XHJ1|A0A1S2XHJ1_CICAR	K.FADNEDLQK.Q	Y	63.54	1078.49	9	-4	540.254	2	33.55	52114000	1	9009	Banda_2_803.raw	1	1	672	680			PEAKS DB
1	A0A1S2XHJ1|A0A1S2XHJ1_CICAR	R.NDVSYPVR.F	Y	62.12	948.466	8	-7	475.24	2	34.12	75791000	1	9312	Banda_2_803.raw	2	2	266	273			PEAKS DB
1	A0A1S2XHJ1|A0A1S2XHJ1_CICAR	K.QAYYLSMEFLQGR.T	Y	61.92	1604.77	13	8	803.391	2	58.81	177780	1	20352	Banda_2_803.raw	2	2	153	165			PEAKS DB
1	A0A1S2XHJ1|A0A1S2XHJ1_CICAR	K.DFPSYIEC(+57.02)QEK.V	Y	61.64	1414.61	11	11	708.312	2	45.41	11194000	1	14250	Banda_2_803.raw	1	1	929	939	Carbamidomethylation	C8:Carbamidomethylation:1000.00	PEAKS DB
1	A0A1S2XHJ1|A0A1S2XHJ1_CICAR	K.EELPEPVPEPPK.L	Y	61.17	1359.69	12	2	680.854	2	40.14	6169200	1	11918	Banda_2_803.raw	1	1	573	584			PEAKS DB
1	A0A1S2XHJ1|A0A1S2XHJ1_CICAR	K.Q(-17.03)AYYLSM(+15.99)EFLQGR.T	Y	59.23	1603.73	13	9	802.875	2	53.98	2835100	1	18284	Banda_2_803.raw	1	1	153	165	Pyro-glu from Q; Oxidation (M)	Q1:Pyro-glu from Q:1000.00;M7:Oxidation (M):1000.00	PEAKS DB
1	A0A1S2XHJ1|A0A1S2XHJ1_CICAR	K.WTEMSILNTAGSFK.F	Y	59.22	1583.77	14	4	792.89	2	56.22	1010400	1	19139	Banda_2_803.raw	1	1	950	963			PEAKS DB
1	A0A1S2XHJ1|A0A1S2XHJ1_CICAR	A.NQEPDAALGNGGLGR.L	N	56.25	1467.71	15	-1	734.861	2	37.16	0	1	10495	Banda_2_803.raw	0	0	196	210			PEAKS DB
1	A0A1S2XHJ1|A0A1S2XHJ1_CICAR	F.APDASSIVSSIK.Y	Y	56.03	1173.62	12	20	587.82	2	47.66	0	1	15178	Banda_2_803.raw	0	0	93	104			PEAKS DB
1	A0A1S2XHJ1|A0A1S2XHJ1_CICAR	K.DLHQQDATTSLTAFAPDASSIVSSIK.Y	Y	55.14	2702.34	26	12	901.788	3	55.91	8436500	1	18975	Banda_2_803.raw	1	1	79	104			PEAKS DB
1	A0A1S2XHJ1|A0A1S2XHJ1_CICAR	N.Q(-17.03)EPDAALGNGGLGR.L	N	52.68	1336.64	14	9	669.326	2	35.11	721440	1	9618	Banda_2_803.raw	1	1	197	210	Pyro-glu from Q	Q1:Pyro-glu from Q:1000.00	PEAKS DB
1	A0A1S2XHJ1|A0A1S2XHJ1_CICAR	F.ELPQAYTATAQSVR.D	Y	51.1	1533.78	14	6	767.897	2	41.01	1071400	1	12292	Banda_2_803.raw	1	1	119	132			PEAKS DB
1	A0A1S2XHJ1|A0A1S2XHJ1_CICAR	A.FAPDASSIVSSIK.Y	Y	50.18	1320.69	13	4	661.354	2	53.63	4145600	1	17855	Banda_2_803.raw	1	1	92	104			PEAKS DB
1	A0A1S2XHJ1|A0A1S2XHJ1_CICAR	R.ADYFLVGK.D	N	49.49	911.475	8	7	456.745	2	54.91	40297000	1	18795	Banda_2_803.raw	1	1	921	928			PEAKS DB
1	A0A1S2XHJ1|A0A1S2XHJ1_CICAR	K.FITDVGATVNHDPEIGDLLK.V	N	48.69	2153.1	20	12	718.708	3	56.36	6530400	1	19151	Banda_2_803.raw	1	1	774	793			PEAKS DB
1	A0A1S2XHJ1|A0A1S2XHJ1_CICAR	R.DIWNIEPAK.L	Y	47.55	1084.56	9	11	543.285	2	55.01	24708000	1	18796	Banda_2_803.raw	2	2	976	984			PEAKS DB
1	A0A1S2XHJ1|A0A1S2XHJ1_CICAR	K.DAWNITQR.T	Y	47.53	1002.49	8	4	502.252	2	46.64	25611000	1	14925	Banda_2_803.raw	2	2	432	439			PEAKS DB
1	A0A1S2XHJ1|A0A1S2XHJ1_CICAR	R.FC(+57.02)NPDLSK.I	N	47.07	979.443	8	-2	490.729	2	35.4	25924000	1	9861	Banda_2_803.raw	1	1	641	648	Carbamidomethylation	C2:Carbamidomethylation:1000.00	PEAKS DB
1	A0A1S2XHJ1|A0A1S2XHJ1_CICAR	K.QQYTLC(+57.02)SASLQDIIAR.F	N	46.81	1865.93	16	12	622.985	3	55.14	2512900	1	18662	Banda_2_803.raw	2	2	369	384	Carbamidomethylation	C6:Carbamidomethylation:1000.00	PEAKS DB
1	A0A1S2XHJ1|A0A1S2XHJ1_CICAR	N.QEPDAALGNGGLGR.L	N	45.3	1353.66	14	17	677.84	2	38.1	0	1	10908	Banda_2_803.raw	0	0	197	210			PEAKS DB
1	A0A1S2XHJ1|A0A1S2XHJ1_CICAR	R.KFADNEDLQK.Q	Y	45.13	1206.59	10	12	604.302	2	54.38	9114300	1	18033	Banda_2_803.raw	1	1	671	680			PEAKS DB
1	A0A1S2XHJ1|A0A1S2XHJ1_CICAR	R.Q(-17.03)LLNIFGIVYR.Y	Y	43.61	1317.74	11	4	659.88	2	64.46	818140	1	22645	Banda_2_803.raw	2	2	724	734	Pyro-glu from Q	Q1:Pyro-glu from Q:1000.00	PEAKS DB
1	A0A1S2XHJ1|A0A1S2XHJ1_CICAR	L.ENVELPAEFADILVKPK.E	Y	43.01	1911.04	17	2	638.019	3	56.72	493420	1	19454	Banda_2_803.raw	1	1	506	522			PEAKS DB
1	A0A1S2XHJ1|A0A1S2XHJ1_CICAR	R.TIIAEYGTADSDLLEKK.L	Y	39.45	1865.96	17	7	622.995	3	55.59	2176700	1	18797	Banda_2_803.raw	1	1	482	498			PEAKS DB
5	A0A1S2YD23|A0A1S2YD23_CICAR	K.VAPADGSAVPSAAADSR.V	Y	88.55	1540.75	17	12	771.382	2	31.94	5785700	1	8116	Banda_2_803.raw	1	1	461	477			PEAKS DB
5	A0A1S2YD23|A0A1S2YD23_CICAR	R.LAVSASAETSADPFGPDAK.Y	Y	84.4	1832.88	19	13	917.448	2	46.42	3890100	1	14791	Banda_2_803.raw	1	1	262	280			PEAKS DB
5	A0A1S2YD23|A0A1S2YD23_CICAR	K.ADGDDAPSPAAPASQQTGLNVAELLVGR.G	Y	77.34	2719.34	28	0	1360.68	2	56.14	5188100	1	19099	Banda_2_803.raw	2	2	492	519			PEAKS DB
5	A0A1S2YD23|A0A1S2YD23_CICAR	R.VM(+15.99)DFGSVFLLSSGK.A	Y	69.82	1501.75	14	10	751.882	2	56.38	1132300	1	19302	Banda_2_803.raw	1	1	478	491	Oxidation (M)	M2:Oxidation (M):1000.00	PEAKS DB
5	A0A1S2YD23|A0A1S2YD23_CICAR	K.VIVTEVLGGGK.F	Y	69.82	1070.63	11	-4	536.324	2	53.35	11797000	1	17971	Banda_2_803.raw	1	1	737	747			PEAKS DB
5	A0A1S2YD23|A0A1S2YD23_CICAR	M.A(+42.01)SAAAGNSAWYK.A	Y	66.67	1237.57	12	0	619.794	2	35.32	6113200	1	9876	Banda_2_803.raw	1	1	2	13	Acetylation (Protein N-term)	A1:Acetylation (Protein N-term):1000.00	PEAKS DB
5	A0A1S2YD23|A0A1S2YD23_CICAR	K.FSNLIGSVYYPDGESAK.D	Y	64.17	1845.88	17	6	923.947	2	54.83	2605300	1	18704	Banda_2_803.raw	1	1	302	318			PEAKS DB
5	A0A1S2YD23|A0A1S2YD23_CICAR	R.SNFYDALLAAESR.A	Y	63.2	1455.7	13	10	728.858	2	56.38	755990	1	19294	Banda_2_803.raw	1	1	534	546			PEAKS DB
5	A0A1S2YD23|A0A1S2YD23_CICAR	R.DVEIEVETVDR.T	Y	61.14	1302.63	11	19	652.324	2	43.78	8004600	1	13471	Banda_2_803.raw	1	1	645	655			PEAKS DB
5	A0A1S2YD23|A0A1S2YD23_CICAR	K.QALDSLEAFQGEAR.T	Y	59.84	1533.74	14	-61	767.874	2	46.99	0	1	14879	Banda_2_803.raw	0	0	946	959			PEAKS DB
5	A0A1S2YD23|A0A1S2YD23_CICAR	K.SITLSSLIAPR.L	Y	57.44	1156.68	11	6	579.348	2	56.2	3865900	1	19116	Banda_2_803.raw	1	1	43	53			PEAKS DB
5	A0A1S2YD23|A0A1S2YD23_CICAR	K.NVAMLVVSQGWAK.V	Y	55.71	1401.74	13	15	701.88	2	56.3	738220	1	19342	Banda_2_803.raw	1	1	105	117			PEAKS DB
5	A0A1S2YD23|A0A1S2YD23_CICAR	K.VPGAAEASVR.N	Y	55.65	955.509	10	-3	478.762	2	33.16	9374600	1	8906	Banda_2_803.raw	1	1	153	162			PEAKS DB
5	A0A1S2YD23|A0A1S2YD23_CICAR	K.FYVQTVGDQK.I	Y	55.5	1183.59	10	0	592.801	2	41.99	6595300	1	12669	Banda_2_803.raw	1	1	748	757			PEAKS DB
5	A0A1S2YD23|A0A1S2YD23_CICAR	R.KVAPADGSAVPSAAADSR.V	Y	52.41	1668.84	18	12	835.43	2	49.33	5713500	1	15723	Banda_2_803.raw	2	2	460	477			PEAKS DB
5	A0A1S2YD23|A0A1S2YD23_CICAR	K.ESPLIGAFNPK.K	Y	50.54	1171.62	11	2	586.819	2	54.93	8644100	1	18392	Banda_2_803.raw	1	1	772	782			PEAKS DB
5	A0A1S2YD23|A0A1S2YD23_CICAR	R.IDYTVPSINR.E	Y	47.62	1176.61	10	7	589.315	2	46.58	8240700	1	15274	Banda_2_803.raw	1	1	85	94			PEAKS DB
5	A0A1S2YD23|A0A1S2YD23_CICAR	K.LQTSFGSDR.I	Y	46.23	1009.48	9	9	505.749	2	39.73	4412700	1	11413	Banda_2_803.raw	1	1	682	690			PEAKS DB
5	A0A1S2YD23|A0A1S2YD23_CICAR	R.KQALDSLEAFQGEAR.T	Y	44.25	1661.84	15	2	554.953	3	55.4	0	1	18813	Banda_2_803.raw	0	0	945	959			PEAKS DB
5	A0A1S2YD23|A0A1S2YD23_CICAR	R.EFGTVFLGDK.N	Y	43.79	1111.55	10	5	556.785	2	55.82	5209900	1	18836	Banda_2_803.raw	1	1	95	104			PEAKS DB
5	A0A1S2YD23|A0A1S2YD23_CICAR	K.DLALELVENGFAK.Y	Y	42.95	1417.75	13	-38	709.877	2	55.31	1318800	1	18893	Banda_2_803.raw	1	1	319	331			PEAKS DB
5	A0A1S2YD23|A0A1S2YD23_CICAR	R.NLPPSALGDPGNFDAMGLLAK.N	Y	41.18	2097.06	21	-2	1049.54	2	56.25	246650	1	19274	Banda_2_803.raw	1	1	163	183			PEAKS DB
5	A0A1S2YD23|A0A1S2YD23_CICAR	K.IASIQTQLASLNLK.E	Y	39.98	1498.87	14	0	750.443	2	55.44	5009300	1	18633	Banda_2_803.raw	1	1	758	771			PEAKS DB
7	A0A3Q7YAD4|A0A3Q7YAD4_CICAR	K.SNLDPTIYGDQTSK.I	Y	87.33	1537.73	14	5	769.871	2	38.05	8496900	1	10976	Banda_2_803.raw	1	1	391	404			PEAKS DB
7	A0A3Q7YAD4|A0A3Q7YAD4_CICAR	M(+15.99)(+42.01)FSGVTGILNK.G	Y	82.86	1223.62	11	5	612.818	2	46.15	426600	1	14590	Banda_2_803.raw	1	1	1	11	Oxidation (M); Acetylation (Protein N-term)	M1:Oxidation (M):1000.00;M1:Acetylation (Protein N-term):1000.00	PEAKS DB
7	A0A3Q7YAD4|A0A3Q7YAD4_CICAR	K.NWVFPDQALPNDLIK.R	Y	75.27	1768.91	15	9	885.466	2	56.77	1192700	1	19443	Banda_2_803.raw	1	1	594	608			PEAKS DB
7	A0A3Q7YAD4|A0A3Q7YAD4_CICAR	K.TYLPSETPSPLVK.Y	Y	73.59	1430.77	13	13	716.391	2	50.02	667700	1	16321	Banda_2_803.raw	1	1	170	182			PEAKS DB
7	A0A3Q7YAD4|A0A3Q7YAD4_CICAR	K.LPLDVISTISPLPVIK.E	Y	63.51	1704.04	16	9	853.03	2	57.77	5511100	1	19861	Banda_2_803.raw	2	2	321	336			PEAKS DB
7	A0A3Q7YAD4|A0A3Q7YAD4_CICAR	R.SVSLQLISATK.S	N	61.72	1145.67	11	-3	573.84	2	54.31	22814000	1	18235	Banda_2_803.raw	1	1	65	75			PEAKS DB
7	A0A3Q7YAD4|A0A3Q7YAD4_CICAR	K.SEKPATEVYVPR.D	Y	61.37	1374.71	12	-8	459.245	3	54.73	4425200	1	18345	Banda_2_803.raw	1	1	253	264			PEAKS DB
7	A0A3Q7YAD4|A0A3Q7YAD4_CICAR	R.DTMNINALAR.Q	N	59.8	1117.55	10	10	559.785	2	45.96	3081400	1	14477	Banda_2_803.raw	1	1	555	564			PEAKS DB
7	A0A3Q7YAD4|A0A3Q7YAD4_CICAR	R.DTM(+15.99)NINALAR.Q	N	53.53	1133.55	10	8	567.783	2	35.12	14364000	1	9670	Banda_2_803.raw	1	1	555	564	Oxidation (M)	M3:Oxidation (M):1000.00	PEAKS DB
7	A0A3Q7YAD4|A0A3Q7YAD4_CICAR	R.EEELHNLR.G	N	53.02	1038.51	8	-18	520.261	2	54.8	1240300	1	18380	Banda_2_803.raw	1	1	185	192			PEAKS DB
7	A0A3Q7YAD4|A0A3Q7YAD4_CICAR	R.TDGEQVLK.F	N	52.36	888.455	8	3	889.463	1	33.32	19188000	1	9010	Banda_2_803.raw	2	2	341	348			PEAKS DB
7	A0A3Q7YAD4|A0A3Q7YAD4_CICAR	K.NVLDYNTIISIGGGNVR.G	Y	46.5	1803.95	17	7	902.982	2	55.82	1084600	1	18895	Banda_2_803.raw	1	1	25	41			PEAKS DB
7	A0A3Q7YAD4|A0A3Q7YAD4_CICAR	R.QSLINADGIIEK.T	Y	46.46	1299.7	12	3	650.859	2	51.09	3731500	1	16819	Banda_2_803.raw	1	1	565	576			PEAKS DB
7	A0A3Q7YAD4|A0A3Q7YAD4_CICAR	K.YGVEM(+15.99)SSAVYK.N	Y	44.9	1248.57	11	11	625.293	2	36.99	2705500	1	9889	Banda_2_803.raw	1	1	583	593	Oxidation (M)	M5:Oxidation (M):1000.00	PEAKS DB
7	A0A3Q7YAD4|A0A3Q7YAD4_CICAR	R.Q(-17.03)SLINADGIIEK.T	Y	43.88	1282.68	12	6	642.346	2	43.75	2542700	1	13577	Banda_2_803.raw	1	1	565	576	Pyro-glu from Q	Q1:Pyro-glu from Q:1000.00	PEAKS DB
12	A0A1S2XBN2|A0A1S2XBN2_CICAR	M(+42.01)FSGVTGLLNR.G	Y	87.39	1235.63	11	0	618.824	2	58.55	116400	1	20289	Banda_2_803.raw	1	1	1	11	Acetylation (Protein N-term)	M1:Acetylation (Protein N-term):1000.00	PEAKS DB
12	A0A1S2XBN2|A0A1S2XBN2_CICAR	M(+15.99)(+42.01)FSGVTGLLNR.G	Y	87.27	1251.63	11	10	626.822	2	49.37	6682600	1	16167	Banda_2_803.raw	1	1	1	11	Oxidation (M); Acetylation (Protein N-term)	M1:Oxidation (M):1000.00;M1:Acetylation (Protein N-term):1000.00	PEAKS DB
12	A0A1S2XBN2|A0A1S2XBN2_CICAR	R.QSLVNDGGIIEK.T	Y	66.37	1271.67	12	8	636.844	2	44.85	7091400	1	13797	Banda_2_803.raw	1	1	567	578			PEAKS DB
12	A0A1S2XBN2|A0A1S2XBN2_CICAR	R.SVSLQLISATK.S	N	61.72	1145.67	11	-3	573.84	2	54.31	22814000	1	18235	Banda_2_803.raw	1	1	60	70			PEAKS DB
12	A0A1S2XBN2|A0A1S2XBN2_CICAR	R.DTMNINALAR.Q	N	59.8	1117.55	10	10	559.785	2	45.96	3081400	1	14477	Banda_2_803.raw	1	1	557	566			PEAKS DB
12	A0A1S2XBN2|A0A1S2XBN2_CICAR	R.TILFFSDDK.T	Y	56.72	1084.54	9	20	543.28	2	56.27	4772300	1	19339	Banda_2_803.raw	1	1	456	464			PEAKS DB
12	A0A1S2XBN2|A0A1S2XBN2_CICAR	R.SDFVYLPR.D	Y	56.17	995.508	8	6	498.761	2	55.11	6859100	1	18642	Banda_2_803.raw	1	1	256	263			PEAKS DB
12	A0A1S2XBN2|A0A1S2XBN2_CICAR	R.PVLGGSDTYPYPR.R	Y	55.32	1420.7	13	5	711.357	2	50.04	3675500	1	16433	Banda_2_803.raw	1	1	225	237			PEAKS DB
12	A0A1S2XBN2|A0A1S2XBN2_CICAR	R.DTM(+15.99)NINALAR.Q	N	53.53	1133.55	10	8	567.783	2	35.12	14364000	1	9670	Banda_2_803.raw	1	1	557	566	Oxidation (M)	M3:Oxidation (M):1000.00	PEAKS DB
12	A0A1S2XBN2|A0A1S2XBN2_CICAR	R.EEELHNLR.G	N	53.02	1038.51	8	-18	520.261	2	54.8	1240300	1	18380	Banda_2_803.raw	1	1	184	191			PEAKS DB
12	A0A1S2XBN2|A0A1S2XBN2_CICAR	R.TDGEQVLK.Y	N	52.36	888.455	8	3	889.463	1	33.32	19188000	1	9010	Banda_2_803.raw	2	2	341	348			PEAKS DB
12	A0A1S2XBN2|A0A1S2XBN2_CICAR	K.DWVFTEQALPNDLVK.R	Y	50.52	1773.89	15	5	887.955	2	56.38	2622500	1	19175	Banda_2_803.raw	1	1	596	610			PEAKS DB
12	A0A1S2XBN2|A0A1S2XBN2_CICAR	K.LPTDIISK.I	Y	45.2	885.517	8	1	443.766	2	45.76	1327000	1	14511	Banda_2_803.raw	1	1	321	328			PEAKS DB
12	A0A1S2XBN2|A0A1S2XBN2_CICAR	R.Q(-17.03)SLVNDGGIIEK.T	Y	41.3	1254.65	12	0	628.33	2	38.73	4978500	1	11050	Banda_2_803.raw	1	1	567	578	Pyro-glu from Q	Q1:Pyro-glu from Q:1000.00	PEAKS DB
12	A0A1S2XBN2|A0A1S2XBN2_CICAR	R.YSM(+15.99)EM(+15.99)SSVIYK.D	Y	40.97	1368.59	11	4	685.305	2	36.67	3190900	1	10177	Banda_2_803.raw	1	1	585	595	Oxidation (M)	M3:Oxidation (M):1000.00;M5:Oxidation (M):1000.00	PEAKS DB
12	A0A1S2XBN2|A0A1S2XBN2_CICAR	R.DNPNWTSDVK.A	Y	40.81	1174.53	10	11	588.271	2	36.93	3981100	1	10269	Banda_2_803.raw	1	1	791	800			PEAKS DB
15	A0A1S2YZ27|A0A1S2YZ27_CICAR	R.SENAVQANMELEFQR.N	N	81.2	1764.81	15	3	883.413	2	50.86	1082600	1	16600	Banda_2_803.raw	1	1	140	154			PEAKS DB
15	A0A1S2YZ27|A0A1S2YZ27_CICAR	R.SDETVSLIESYLR.A	Y	77.03	1510.75	13	9	756.384	2	57	1442100	1	19537	Banda_2_803.raw	3	3	331	343			PEAKS DB
15	A0A1S2YZ27|A0A1S2YZ27_CICAR	K.VAEFTFNETPAK.L	Y	76.26	1352.66	12	3	677.338	2	48.94	9345900	1	15716	Banda_2_803.raw	1	1	417	428			PEAKS DB
15	A0A1S2YZ27|A0A1S2YZ27_CICAR	K.MFVDYSEPQVER.V	Y	61.21	1498.68	12	1	750.346	2	50.63	629910	1	16620	Banda_2_803.raw	1	1	347	358			PEAKS DB
15	A0A1S2YZ27|A0A1S2YZ27_CICAR	K.DGEDAETLGLTGHER.F	Y	59.01	1598.72	15	-4	533.913	3	53.92	2839700	1	17825	Banda_2_803.raw	2	2	826	840			PEAKS DB
15	A0A1S2YZ27|A0A1S2YZ27_CICAR	R.SENAVQANM(+15.99)ELEFQR.N	N	53.76	1780.8	15	1	891.41	2	41.65	217200	1	12308	Banda_2_803.raw	1	1	140	154	Oxidation (M)	M9:Oxidation (M):1000.00	PEAKS DB
15	A0A1S2YZ27|A0A1S2YZ27_CICAR	K.TSLAPGSGVVTK.Y	N	51.54	1115.62	12	-7	558.816	2	35.93	15781000	1	9852	Banda_2_803.raw	1	1	474	485			PEAKS DB
15	A0A1S2YZ27|A0A1S2YZ27_CICAR	K.M(+15.99)FVDYSEPQVER.V	Y	50.95	1514.67	12	12	758.344	2	44.31	2831200	1	13682	Banda_2_803.raw	1	1	347	358	Oxidation (M)	M1:Oxidation (M):1000.00	PEAKS DB
15	A0A1S2YZ27|A0A1S2YZ27_CICAR	K.LSVFDAATK.Y	Y	49.05	950.507	9	-5	476.261	2	52.13	6953800	1	17133	Banda_2_803.raw	1	1	756	764			PEAKS DB
15	A0A1S2YZ27|A0A1S2YZ27_CICAR	R.ETYNAITK.G	Y	38.92	938.471	8	-11	470.242	2	33.41	4873300	1	8880	Banda_2_803.raw	1	1	616	623			PEAKS DB
16	A0A1S2Y087|A0A1S2Y087_CICAR	R.NFLAGEDDNVISQIQNPVK.E	Y	64.39	2100.05	19	-3	1051.03	2	54.93	1231100	1	18782	Banda_2_803.raw	1	1	525	543			PEAKS DB
16	A0A1S2Y087|A0A1S2Y087_CICAR	K.ELTFPGSAQEVNR.L	Y	60.56	1446.71	13	4	724.363	2	48.15	21700	1	15241	Banda_2_803.raw	1	1	544	556			PEAKS DB
16	A0A1S2Y087|A0A1S2Y087_CICAR	K.LPAGTTAYLANHDDEEDLR.V	Y	59.84	2099.98	19	-3	700.999	3	55.09	1687800	1	18569	Banda_2_803.raw	1	1	262	280			PEAKS DB
16	A0A1S2Y087|A0A1S2Y087_CICAR	K.AILTVLNPNDR.N	N	59.84	1224.68	11	10	613.349	2	55.22	9166500	1	18533	Banda_2_803.raw	1	1	239	249			PEAKS DB
16	A0A1S2Y087|A0A1S2Y087_CICAR	R.Q(-17.03)SYFANAQPQQR.E	Y	59.22	1419.65	12	-2	710.834	2	33.42	493620	1	8842	Banda_2_803.raw	1	1	563	574	Pyro-glu from Q	Q1:Pyro-glu from Q:1000.00	PEAKS DB
16	A0A1S2Y087|A0A1S2Y087_CICAR	R.VLLEEQEPEQSR.G	Y	57.03	1455.72	12	13	728.869	2	39.93	9378200	1	11606	Banda_2_803.raw	1	1	331	342			PEAKS DB
16	A0A1S2Y087|A0A1S2Y087_CICAR	R.GSEESEEGDAIVK.V	Y	56.79	1348.6	13	-1	675.307	2	33.04	444900	1	8857	Banda_2_803.raw	1	1	346	358			PEAKS DB
16	A0A1S2Y087|A0A1S2Y087_CICAR	K.SISSESEPFNLR.S	Y	44.36	1364.66	12	6	683.336	2	51.66	3246400	1	17219	Banda_2_803.raw	1	1	378	389			PEAKS DB
16	A0A1S2Y087|A0A1S2Y087_CICAR	K.SILEASFNTK.Y	Y	44.15	1108.58	10	-8	555.295	2	54.56	5204400	1	18159	Banda_2_803.raw	1	1	315	324			PEAKS DB
19	A0A1S2XSV9|A0A1S2XSV9_CICAR	K.NAPSIIFIDEIDSIAPK.R	Y	67.79	1841.98	17	3	921.996	2	57.68	1053200	1	20153	Banda_2_803.raw	1	1	300	316			PEAKS DB
19	A0A1S2XSV9|A0A1S2XSV9_CICAR	K.GILLYGPPGSGK.T	Y	60.24	1157.64	12	8	579.83	2	55.31	2365600	1	18668	Banda_2_803.raw	1	1	244	255			PEAKS DB
19	A0A1S2XSV9|A0A1S2XSV9_CICAR	R.GSSVGDAGGAADR.V	Y	55	1118.5	13	1	560.255	2	27.07	4158800	1	6328	Banda_2_803.raw	1	1	591	603			PEAKS DB
19	A0A1S2XSV9|A0A1S2XSV9_CICAR	K.GVLFYGPPGC(+57.02)GK.T	Y	54.87	1250.61	12	15	626.314	2	55.17	405880	1	18670	Banda_2_803.raw	1	1	517	528	Carbamidomethylation	C10:Carbamidomethylation:1000.00	PEAKS DB
19	A0A1S2XSV9|A0A1S2XSV9_CICAR	R.DFSTAILER.K	Y	54.84	1050.53	9	4	526.275	2	54.3	861420	1	18125	Banda_2_803.raw	1	1	16	24			PEAKS DB
19	A0A1S2XSV9|A0A1S2XSV9_CICAR	R.LDQLIYIPLPDEDSR.H	Y	50.21	1785.91	15	18	893.966	2	56.43	150200	1	19301	Banda_2_803.raw	1	1	643	657			PEAKS DB
19	A0A1S2XSV9|A0A1S2XSV9_CICAR	K.YQAFAQTLQQSR.G	Y	44.46	1439.72	12	-21	720.864	2	47.07	0	1	14916	Banda_2_803.raw	0	0	759	770			PEAKS DB
17	A0A1S2XSB9|A0A1S2XSB9_CICAR	R.DFLEDALNVNR.H	N	67.53	1304.64	11	4	653.326	2	56.17	3429300	1	19091	Banda_2_803.raw	1	1	218	228			PEAKS DB
17	A0A1S2XSB9|A0A1S2XSB9_CICAR	R.LHQNIDSSSSPDIYIPQAGR.I	Y	67.34	2197.08	20	10	733.367	3	54.76	4210500	1	18352	Banda_2_803.raw	1	1	344	363			PEAKS DB
17	A0A1S2XSB9|A0A1S2XSB9_CICAR	K.SSNPFTFLVPPR.E	Y	65.32	1360.71	12	-69	681.36	2	57.36	3532300	1	19797	Banda_2_803.raw	2	2	499	510			PEAKS DB
17	A0A1S2XSB9|A0A1S2XSB9_CICAR	R.IESEGGLIETWNPNNR.Q	Y	60.34	1827.88	16	18	914.947	2	54.03	203100	1	18354	Banda_2_803.raw	1	1	45	60			PEAKS DB
17	A0A1S2XSB9|A0A1S2XSB9_CICAR	K.TVTSFDLPALR.W	N	55.29	1218.66	11	8	610.338	2	55.74	14416000	1	18811	Banda_2_803.raw	1	1	366	376			PEAKS DB
17	A0A1S2XSB9|A0A1S2XSB9_CICAR	R.ALIVPQNFAVAAK.S	Y	48.82	1340.78	13	2	671.398	2	54.98	10191000	1	18430	Banda_2_803.raw	1	1	434	446			PEAKS DB
17	A0A1S2XSB9|A0A1S2XSB9_CICAR	R.FSYVAFK.T	N	46.26	860.443	7	16	861.452	1	55.31	495140	1	18631	Banda_2_803.raw	1	1	452	458			PEAKS DB
24	sp|Q9SMJ4|LEG_CICAR	R.LHQNIGSSSSPDIYNPQAGR.I	N	71.08	2140.03	20	15	714.352	3	54.33	4613400	1	18406	Banda_2_803.raw	1	1	322	341			PEAKS DB
24	sp|Q9SMJ4|LEG_CICAR	R.DFLEDALNVNR.R	N	67.53	1304.64	11	4	653.326	2	56.17	3429300	1	19091	Banda_2_803.raw	1	1	216	226			PEAKS DB
24	sp|Q9SMJ4|LEG_CICAR	R.YQQEGSEEEENEGGNIFSGFK.R	Y	63.78	2377	21	0	1189.51	2	53.15	2753500	1	17548	Banda_2_803.raw	2	2	194	214			PEAKS DB
24	sp|Q9SMJ4|LEG_CICAR	K.GNSVFDGELEAGR.A	N	57.08	1349.62	13	15	675.819	2	48.73	5179500	1	15262	Banda_2_803.raw	1	1	400	412			PEAKS DB
24	sp|Q9SMJ4|LEG_CICAR	K.SEGGLIETWNPSNK.Q	N	47.41	1530.73	14	12	766.374	2	52.06	4466500	1	17310	Banda_2_803.raw	1	1	47	60			PEAKS DB
24	sp|Q9SMJ4|LEG_CICAR	R.FSYVAFK.T	N	46.26	860.443	7	16	861.452	1	55.31	495140	1	18631	Banda_2_803.raw	1	1	431	437			PEAKS DB
24	sp|Q9SMJ4|LEG_CICAR	R.ALIVPQNFAIAAK.S	N	40.57	1354.8	13	3	678.406	2	55.41	9852800	1	18644	Banda_2_803.raw	1	1	413	425			PEAKS DB
26	A0A1S2XVM2|A0A1S2XVM2_CICAR	K.EGSSIINTTSVNAYK.G	Y	73.57	1582.78	15	15	792.4	2	42.58	11617000	1	13024	Banda_2_803.raw	1	1	206	220			PEAKS DB
26	A0A1S2XVM2|A0A1S2XVM2_CICAR	R.VVDEIINTYGR.I	Y	73.2	1277.66	11	13	639.839	2	49.88	11679000	1	16146	Banda_2_803.raw	1	1	147	157			PEAKS DB
26	A0A1S2XVM2|A0A1S2XVM2_CICAR	K.IAVVTGGDSGIGR.S	Y	71.63	1200.65	13	9	601.331	2	41.68	15424000	1	12367	Banda_2_803.raw	1	1	75	87			PEAKS DB
26	A0A1S2XVM2|A0A1S2XVM2_CICAR	R.ALSLQLVSK.G	Y	54.95	957.586	9	3	479.8	2	54.25	13108000	1	18094	Banda_2_803.raw	1	1	241	249			PEAKS DB
26	A0A1S2XVM2|A0A1S2XVM2_CICAR	K.DPM(+15.99)AIPADLGFDENC(+57.02)KR.V	Y	43.27	1963.88	17	5	655.633	3	54.8	280330	1	18483	Banda_2_803.raw	1	1	130	146	Oxidation (M); Carbamidomethylation	M3:Oxidation (M):1000.00;C15:Carbamidomethylation:1000.00	PEAKS DB
29	A0A1S2YKV2|A0A1S2YKV2_CICAR	K.QEPQPLEAYDLVSDLSVAGK.G	Y	69.8	2158.08	20	17	1080.05	2	56.47	342980	1	19265	Banda_2_803.raw	1	1	264	283			PEAKS DB
29	A0A1S2YKV2|A0A1S2YKV2_CICAR	K.QDPGEEAIESLSAELK.L	Y	68	1714.83	16	21	858.422	2	55.85	400690	1	19072	Banda_2_803.raw	1	1	290	305			PEAKS DB
29	A0A1S2YKV2|A0A1S2YKV2_CICAR	R.VGDDPNAEER.L	Y	66.58	1100.47	10	1	551.244	2	27.02	1348500	1	6270	Banda_2_803.raw	1	1	370	379			PEAKS DB
29	A0A1S2YKV2|A0A1S2YKV2_CICAR	K.AIVC(+57.02)SDAAAEAAR.Y	Y	54.74	1303.62	13	3	652.817	2	35.58	997360	1	10084	Banda_2_803.raw	1	1	684	696	Carbamidomethylation	C4:Carbamidomethylation:1000.00	PEAKS DB
29	A0A1S2YKV2|A0A1S2YKV2_CICAR	R.EILEANGLDSSGTEPEITR.R	Y	43.09	2029.98	19	23	1016	2	47.66	291710	1	15308	Banda_2_803.raw	1	1	79	97			PEAKS DB
29	A0A1S2YKV2|A0A1S2YKV2_CICAR	K.SPPEDTTSLEDK.K	Y	42.7	1317.59	12	9	659.805	2	31.82	652860	1	8173	Banda_2_803.raw	1	1	725	736			PEAKS DB
25	A0A1S2YIQ1|A0A1S2YIQ1_CICAR	K.AFATYVQAK.R	N	64.23	997.523	9	13	499.769	2	44.4	68668000	1	13551	Banda_2_803.raw	1	1	752	760			PEAKS DB
25	A0A1S2YIQ1|A0A1S2YIQ1_CICAR	A.NQEPDAALGNGGLGR.L	N	56.25	1467.71	15	-1	734.861	2	37.16	0	1	10495	Banda_2_803.raw	0	0	182	196			PEAKS DB
25	A0A1S2YIQ1|A0A1S2YIQ1_CICAR	K.IC(+57.02)YILYPGDESIEGK.T	Y	55.9	1755.84	15	8	878.927	2	54.23	28896000	1	18136	Banda_2_803.raw	1	1	335	349	Carbamidomethylation	C2:Carbamidomethylation:1000.00	PEAKS DB
25	A0A1S2YIQ1|A0A1S2YIQ1_CICAR	N.Q(-17.03)EPDAALGNGGLGR.L	N	52.68	1336.64	14	9	669.326	2	35.11	721440	1	9618	Banda_2_803.raw	1	1	183	196	Pyro-glu from Q	Q1:Pyro-glu from Q:1000.00	PEAKS DB
25	A0A1S2YIQ1|A0A1S2YIQ1_CICAR	R.ADYFLVGK.D	N	49.49	911.475	8	7	456.745	2	54.91	40297000	1	18795	Banda_2_803.raw	1	1	912	919			PEAKS DB
25	A0A1S2YIQ1|A0A1S2YIQ1_CICAR	K.FITDVGATVNHDPEIGDLLK.V	N	48.69	2153.1	20	12	718.708	3	56.36	6530400	1	19151	Banda_2_803.raw	1	1	765	784			PEAKS DB
25	A0A1S2YIQ1|A0A1S2YIQ1_CICAR	R.FC(+57.02)NPDLSK.I	N	47.07	979.443	8	-2	490.729	2	35.4	25924000	1	9861	Banda_2_803.raw	1	1	632	639	Carbamidomethylation	C2:Carbamidomethylation:1000.00	PEAKS DB
25	A0A1S2YIQ1|A0A1S2YIQ1_CICAR	K.QQYTLC(+57.02)SASLQDIIAR.F	N	46.81	1865.93	16	12	622.985	3	55.14	2512900	1	18662	Banda_2_803.raw	2	2	355	370	Carbamidomethylation	C6:Carbamidomethylation:1000.00	PEAKS DB
25	A0A1S2YIQ1|A0A1S2YIQ1_CICAR	N.QEPDAALGNGGLGR.L	N	45.3	1353.66	14	17	677.84	2	38.1	0	1	10908	Banda_2_803.raw	0	0	183	196			PEAKS DB
30	A0A1S2X990|A0A1S2X990_CICAR	R.IPTAFVVTPELVAR.K	Y	71.72	1511.87	14	9	756.943	2	56.25	106300	1	19273	Banda_2_803.raw	1	1	476	489			PEAKS DB
30	A0A1S2X990|A0A1S2X990_CICAR	K.QTFTGPPENVR.D	Y	57.41	1244.61	11	15	623.316	2	36.98	994270	1	10875	Banda_2_803.raw	1	1	676	686			PEAKS DB
30	A0A1S2X990|A0A1S2X990_CICAR	K.LSILAESNER.A	Y	50.01	1130.59	10	-5	566.304	2	51.47	1528600	1	16788	Banda_2_803.raw	1	1	811	820			PEAKS DB
30	A0A1S2X990|A0A1S2X990_CICAR	R.DGQDYAAAAAGGGSGALSSGGR.W	Y	43.8	1894.84	22	5	948.428	2	33.79	697180	1	8858	Banda_2_803.raw	1	1	839	860			PEAKS DB
30	A0A1S2X990|A0A1S2X990_CICAR	K.ELLAQGVSQSR.Y	Y	43.51	1186.63	11	3	594.323	2	41.38	1615200	1	12472	Banda_2_803.raw	1	1	596	606			PEAKS DB
30	A0A1S2X990|A0A1S2X990_CICAR	R.IGGGGLDLPPR.R	Y	43.18	1050.58	11	6	526.299	2	49.4	1759700	1	15777	Banda_2_803.raw	1	1	826	836			PEAKS DB
28	A0A1S2XQR4|A0A1S2XQR4_CICAR	K.ILEASFNSDYEEIER.V	Y	72.56	1813.84	15	64	907.932	2	53.85	0	1	18015	Banda_2_803.raw	0	0	176	190			PEAKS DB
28	A0A1S2XQR4|A0A1S2XQR4_CICAR	R.AILTVLNPNDR.N	N	59.84	1224.68	11	10	613.349	2	55.22	9166500	1	18533	Banda_2_803.raw	1	1	99	109			PEAKS DB
28	A0A1S2XQR4|A0A1S2XQR4_CICAR	K.EVAFPGSAEEVDR.L	N	55.03	1404.65	13	4	703.334	2	44.93	1820900	1	13916	Banda_2_803.raw	1	1	407	419			PEAKS DB
28	A0A1S2XQR4|A0A1S2XQR4_CICAR	R.ATVILVVNEGK.G	N	48.46	1141.67	11	4	571.843	2	49.78	1750400	1	15959	Banda_2_803.raw	1	1	303	313			PEAKS DB
28	A0A1S2XQR4|A0A1S2XQR4_CICAR	K.YGNFFEITPEK.N	N	43.33	1343.64	11	16	672.828	2	55.74	1282600	1	19040	Banda_2_803.raw	1	1	263	273			PEAKS DB
28	A0A1S2XQR4|A0A1S2XQR4_CICAR	R.Q(-17.03)EADVIVK.I	N	39.93	883.465	8	10	884.473	1	32.23	391820	1	8590	Banda_2_803.raw	1	1	215	222	Pyro-glu from Q	Q1:Pyro-glu from Q:1000.00	PEAKS DB
37	Q304D4|Q304D4_CICAR	R.QQSQSQSQQEADVIVK.I	Y	83.76	1801.88	16	1	901.948	2	33.47	928470	1	9003	Banda_2_803.raw	1	1	205	220			PEAKS DB
37	Q304D4|Q304D4_CICAR	K.EVAFPGSAEEVDR.L	N	55.03	1404.65	13	4	703.334	2	44.93	1820900	1	13916	Banda_2_803.raw	1	1	405	417			PEAKS DB
37	Q304D4|Q304D4_CICAR	R.ATVILVVNEGK.G	N	48.46	1141.67	11	4	571.843	2	49.78	1750400	1	15959	Banda_2_803.raw	1	1	301	311			PEAKS DB
37	Q304D4|Q304D4_CICAR	K.YGNFFEITPEK.N	N	43.33	1343.64	11	16	672.828	2	55.74	1282600	1	19040	Banda_2_803.raw	1	1	261	271			PEAKS DB
37	Q304D4|Q304D4_CICAR	Q.Q(-17.03)EADVIVK.I	N	39.93	883.465	8	10	884.473	1	32.23	391820	1	8590	Banda_2_803.raw	1	1	213	220	Pyro-glu from Q	Q1:Pyro-glu from Q:1000.00	PEAKS DB
31	A0A1S2XV08|A0A1S2XV08_CICAR	K.NNPNILNNLIYTPLTITPEGEYR.M	Y	67.69	2658.37	23	-12	1330.19	2	57.24	266730	1	19750	Banda_2_803.raw	1	1	246	268			PEAKS DB
31	A0A1S2XV08|A0A1S2XV08_CICAR	K.EAQVNAVGPFGLC(+57.02)FDSK.R	Y	49.73	1837.87	17	14	919.942	2	55.57	855950	1	18837	Banda_2_803.raw	1	1	330	346	Carbamidomethylation	C13:Carbamidomethylation:1000.00	PEAKS DB
31	A0A1S2XV08|A0A1S2XV08_CICAR	R.QLEENLLLFDLVESK.L	Y	49.19	1788.95	15	-5	895.482	2	62.57	46492	1	21960	Banda_2_803.raw	1	1	402	416			PEAKS DB
31	A0A1S2XV08|A0A1S2XV08_CICAR	K.LGFSNSLSSR.G	Y	46.25	1066.54	10	4	534.278	2	50.99	231900	1	16776	Banda_2_803.raw	1	1	417	426			PEAKS DB
31	A0A1S2XV08|A0A1S2XV08_CICAR	R.TPLMQLPVLIDLNGK.H	Y	43.28	1650.94	15	18	826.478	2	57.57	0	1	19904	Banda_2_803.raw	0	0	64	78			PEAKS DB
31	A0A1S2XV08|A0A1S2XV08_CICAR	K.ATISIGSR.Q	Y	41.96	803.45	8	3	402.733	2	38.72	0	1	11187	Banda_2_803.raw	0	0	394	401			PEAKS DB
31	A0A1S2XV08|A0A1S2XV08_CICAR	K.AVNVEFVLDR.S	Y	41.86	1160.62	10	1	581.317	2	55.52	1472500	1	18860	Banda_2_803.raw	1	1	351	360			PEAKS DB
40	A0A3Q7K771|A0A3Q7K771_CICAR	K.YVLLDYAPGTTNDK.V	Y	66.07	1568.77	14	12	785.394	2	54.35	156900	1	18239	Banda_2_803.raw	1	1	27	40			PEAKS DB
40	A0A3Q7K771|A0A3Q7K771_CICAR	R.NNEAYLFINDK.Y	Y	61.26	1339.64	11	-3	670.827	2	52.15	473190	1	17092	Banda_2_803.raw	1	1	16	26			PEAKS DB
40	A0A3Q7K771|A0A3Q7K771_CICAR	K.VLYGPSFVR.D	Y	45.09	1036.57	9	-12	519.292	2	55.41	2288900	1	18719	Banda_2_803.raw	1	1	41	49			PEAKS DB
40	A0A3Q7K771|A0A3Q7K771_CICAR	R.IDYETNR.L	Y	39.09	909.419	7	-5	455.717	2	32.98	4039200	1	8542	Banda_2_803.raw	1	1	144	150			PEAKS DB
61	A0A1S2XVJ8|A0A1S2XVJ8_CICAR	R.NIENYGLAVLEVK.G	Y	70.08	1460.79	13	26	731.403	2	56.02	0	1	19147	Banda_2_803.raw	0	0	120	132			PEAKS DB
61	A0A1S2XVJ8|A0A1S2XVJ8_CICAR	R.NPESVLTAFSSK.V	Y	58.18	1278.65	12	-5	640.33	2	55.24	3454600	1	18535	Banda_2_803.raw	1	1	223	234			PEAKS DB
97	A0A1S2YP37|A0A1S2YP37_CICAR	R.IINEPTAAAIAYGLDK.K	Y	57.52	1658.89	16	28	830.454	2	55.06	234340	1	18637	Banda_2_803.raw	1	1	175	190			PEAKS DB
97	A0A1S2YP37|A0A1S2YP37_CICAR	K.NAVVTVPAYFNDSQR.Q	Y	42.07	1679.83	15	5	840.921	2	50.72	126880	1	16752	Banda_2_803.raw	1	1	144	158			PEAKS DB
171	O81921|O81921_CICAR	R.Q(-17.03)TVAVGVIK.S	Y	50.72	896.533	9	11	897.541	1	36.87	240370	1	10170	Banda_2_803.raw	1	1	298	306	Pyro-glu from Q	Q1:Pyro-glu from Q:1000.00	PEAKS DB
171	O81921|O81921_CICAR	K.LPLQDVYK.I	Y	48.01	974.544	8	0	488.279	2	51.54	1428200	1	16996	Banda_2_803.raw	1	1	115	122			PEAKS DB
75	A0A1S2Y5N0|A0A1S2Y5N0_CICAR	R.LVELTGTPDAIATAEK.L	Y	39.64	1627.87	16	-5	814.94	2	49.49	493690	1	15929	Banda_2_803.raw	1	1	160	175			PEAKS DB
75	A0A1S2Y5N0|A0A1S2Y5N0_CICAR	K.Q(-17.03)IVNSVISGENRPR.N	Y	39.28	1550.82	14	9	776.416	2	50.97	101130	1	16471	Banda_2_803.raw	1	1	268	281	Pyro-glu from Q	Q1:Pyro-glu from Q:1000.00	PEAKS DB

## Sheet: 3
Protein Group	Protein ID	Protein Accession	Peptide	Unique	Score	Mass	Length	ppm	m/z	z	RT	Area Sample	Fraction	Scan	Source File	#Feature	#Feature Sample 1	Start	End	PTM	AScore	Found By
1	5	A0A1S2XBN2|A0A1S2XBN2_CICAR	K.EHLEPNLEGLTVEEAIQNK.K	Y	109.73	2162.09	19	21	1082.05	2	52.73	141990000	1	18605	Banda_3_836.raw	2	2	408	426			PEAKS DB
1	5	A0A1S2XBN2|A0A1S2XBN2_CICAR	K.EHLEPNLEGLTVEEAIQNKK.L	Y	94.11	2290.18	20	3	573.553	4	53.33	36389000	1	18901	Banda_3_836.raw	4	4	408	427			PEAKS DB
1	5	A0A1S2XBN2|A0A1S2XBN2_CICAR	R.HASDELYLGER.D	Y	91.44	1288.6	11	8	645.31	2	50.39	13330000	1	17392	Banda_3_836.raw	2	2	780	790			PEAKS DB
1	5	A0A1S2XBN2|A0A1S2XBN2_CICAR	M(+15.99)(+42.01)FSGVTGLLNR.G	N	87.58	1251.63	11	18	626.822	2	48.5	171950000	1	16419	Banda_3_836.raw	4	4	1	11	Oxidation (M); Acetylation (Protein N-term)	M1:Oxidation (M):1000.00;M1:Acetylation (Protein N-term):1000.00	PEAKS DB
1	5	A0A1S2XBN2|A0A1S2XBN2_CICAR	M(+42.01)FSGVTGLLNR.G	N	84.52	1235.63	11	7	618.824	2	56.71	42913000	1	20932	Banda_3_836.raw	2	2	1	11	Acetylation (Protein N-term)	M1:Acetylation (Protein N-term):1000.00	PEAKS DB
1	5	A0A1S2XBN2|A0A1S2XBN2_CICAR	K.SSDFLTYALK.A	Y	80.08	1143.58	10	-9	572.797	2	51.84	198320000	1	18347	Banda_3_836.raw	2	2	272	281			PEAKS DB
1	5	A0A1S2XBN2|A0A1S2XBN2_CICAR	R.QSLVNDGGIIEK.T	Y	78.38	1271.67	12	24	636.845	2	42.88	149230000	1	13410	Banda_3_836.raw	2	2	567	578			PEAKS DB
1	5	A0A1S2XBN2|A0A1S2XBN2_CICAR	K.DWVFTEQALPNDLVK.R	Y	76.04	1773.89	15	14	887.955	2	53.63	119470000	1	19347	Banda_3_836.raw	1	1	596	610			PEAKS DB
1	5	A0A1S2XBN2|A0A1S2XBN2_CICAR	R.IYDYDVYNDLGNPDSGDNHAR.P	Y	75.93	2412.03	21	18	1207.02	2	50.28	3749000	1	17435	Banda_3_836.raw	2	2	204	224			PEAKS DB
1	5	A0A1S2XBN2|A0A1S2XBN2_CICAR	R.DTM(+15.99)NINALAR.Q	N	73.4	1133.55	10	15	567.783	2	33.45	276160000	1	8916	Banda_3_836.raw	1	1	557	566	Oxidation (M)	M3:Oxidation (M):1000.00	PEAKS DB
1	5	A0A1S2XBN2|A0A1S2XBN2_CICAR	K.LQTLIDLSVIEILSR.H	N	72.36	1712.01	15	13	857.013	2	60.13	92118	1	22261	Banda_3_836.raw	1	1	765	779			PEAKS DB
1	5	A0A1S2XBN2|A0A1S2XBN2_CICAR	R.SVSLQLISATK.S	N	71.93	1145.67	11	10	573.841	2	48.68	457810000	1	16476	Banda_3_836.raw	2	2	60	70			PEAKS DB
1	5	A0A1S2XBN2|A0A1S2XBN2_CICAR	R.EM(+15.99)LAGVNPNVIC(+57.02)C(+57.02)LK.E	Y	71.65	1732.83	15	8	867.423	2	47.78	11471000	1	16000	Banda_3_836.raw	1	1	371	385	Oxidation (M); Carbamidomethylation	M2:Oxidation (M):1000.00;C12:Carbamidomethylation:1000.00;C13:Carbamidomethylation:1000.00	PEAKS DB
1	5	A0A1S2XBN2|A0A1S2XBN2_CICAR	R.DTMNINALAR.Q	N	71.21	1117.55	10	38	559.787	2	44.07	79803000	1	14062	Banda_3_836.raw	1	1	557	566			PEAKS DB
1	5	A0A1S2XBN2|A0A1S2XBN2_CICAR	R.Q(-17.03)SLVNDGGIIEK.T	Y	70.06	1254.65	12	20	628.331	2	37.97	117520000	1	11323	Banda_3_836.raw	1	1	567	578	Pyro-glu from Q	Q1:Pyro-glu from Q:1000.00	PEAKS DB
1	5	A0A1S2XBN2|A0A1S2XBN2_CICAR	R.DNPNWTSDVK.A	Y	69.55	1174.53	10	15	588.271	2	34.66	206210000	1	9788	Banda_3_836.raw	1	1	791	800			PEAKS DB
1	5	A0A1S2XBN2|A0A1S2XBN2_CICAR	R.PVLGGSDTYPYPR.R	Y	69.04	1420.7	13	9	711.357	2	47.09	87874000	1	15646	Banda_3_836.raw	1	1	225	237			PEAKS DB
1	5	A0A1S2XBN2|A0A1S2XBN2_CICAR	K.E(-18.01)HLEPNLEGLTVEEAIQNKK.L	Y	67.81	2272.17	20	28	758.399	3	52.62	3267900	1	18472	Banda_3_836.raw	1	1	408	427	Pyro-glu from E	E1:Pyro-glu from E:1000.00	PEAKS DB
1	5	A0A1S2XBN2|A0A1S2XBN2_CICAR	R.SDFVYLPR.D	N	67.49	995.508	8	6	498.761	2	49.71	302080000	1	16984	Banda_3_836.raw	2	2	256	263			PEAKS DB
1	5	A0A1S2XBN2|A0A1S2XBN2_CICAR	K.LDSQVYGDHTSK.I	Y	67.28	1348.63	12	-6	675.32	2	46.73	330350000	1	15225	Banda_3_836.raw	2	2	393	404			PEAKS DB
1	5	A0A1S2XBN2|A0A1S2XBN2_CICAR	R.YSM(+15.99)EM(+15.99)SSVIYK.D	Y	66.61	1368.59	11	7	685.305	2	34.77	51443000	1	9571	Banda_3_836.raw	1	1	585	595	Oxidation (M)	M3:Oxidation (M):1000.00;M5:Oxidation (M):1000.00	PEAKS DB
1	5	A0A1S2XBN2|A0A1S2XBN2_CICAR	K.LVVDDYPYAVDGLEIWTTIK.T	Y	65.78	2309.18	20	13	1155.6	2	57.51	33448000	1	20944	Banda_3_836.raw	3	3	626	645			PEAKS DB
1	5	A0A1S2XBN2|A0A1S2XBN2_CICAR	K.SAWMTDEEFVR.E	Y	64.44	1369.6	11	11	685.807	2	50.81	21153000	1	17708	Banda_3_836.raw	1	1	360	370			PEAKS DB
1	5	A0A1S2XBN2|A0A1S2XBN2_CICAR	K.ELVEVGHGDKK.N	Y	64.27	1209.64	11	15	605.826	2	51.21	5899000	1	17546	Banda_3_836.raw	2	2	674	684			PEAKS DB
1	5	A0A1S2XBN2|A0A1S2XBN2_CICAR	K.ELVEVGHGDK.K	Y	63.64	1081.54	10	5	541.778	2	48.05	37598000	1	16243	Banda_3_836.raw	1	1	674	683			PEAKS DB
1	5	A0A1S2XBN2|A0A1S2XBN2_CICAR	R.EEELHNLR.G	N	62.91	1038.51	8	0	520.262	2	48.4	5544000	1	16420	Banda_3_836.raw	1	1	184	191			PEAKS DB
1	5	A0A1S2XBN2|A0A1S2XBN2_CICAR	R.EMLAGVNPNVIC(+57.02)C(+57.02)LK.E	Y	62.5	1716.84	15	8	859.426	2	50.44	6782100	1	17094	Banda_3_836.raw	1	1	371	385	Carbamidomethylation	C12:Carbamidomethylation:1000.00;C13:Carbamidomethylation:1000.00	PEAKS DB
1	5	A0A1S2XBN2|A0A1S2XBN2_CICAR	R.TDGEQVLK.Y	N	62.23	888.455	8	-23	445.234	2	21.7	395180000	1	4345	Banda_3_836.raw	3	3	341	348			PEAKS DB
1	5	A0A1S2XBN2|A0A1S2XBN2_CICAR	R.IFFANQTYLPSETPSPLAHYR.E	Y	61.24	2451.22	21	8	818.082	3	54.36	7432200	1	19322	Banda_3_836.raw	1	1	163	183			PEAKS DB
1	5	A0A1S2XBN2|A0A1S2XBN2_CICAR	R.TILFFSDDK.T	Y	60.75	1084.54	9	13	543.28	2	53.1	105340000	1	18722	Banda_3_836.raw	2	2	456	464			PEAKS DB
1	5	A0A1S2XBN2|A0A1S2XBN2_CICAR	R.YSMEMSSVIYK.D	Y	60.2	1336.6	11	25	669.311	2	48.5	16819000	1	16218	Banda_3_836.raw	1	1	585	595			PEAKS DB
1	5	A0A1S2XBN2|A0A1S2XBN2_CICAR	E.HLEPNLEGLTVEEAIQNK.K	Y	57.37	2033.04	18	9	678.689	3	53.04	1283300	1	18815	Banda_3_836.raw	1	1	409	426			PEAKS DB
1	5	A0A1S2XBN2|A0A1S2XBN2_CICAR	R.E(-18.01)EELHNLR.G	N	54.8	1020.5	8	6	511.257	2	39.91	752100	1	12233	Banda_3_836.raw	1	1	184	191	Pyro-glu from E	E1:Pyro-glu from E:1000.00	PEAKS DB
1	5	A0A1S2XBN2|A0A1S2XBN2_CICAR	R.GMASWDSASPHGVK.L	Y	53.13	1428.65	14	9	477.223	3	50.28	13212000	1	17535	Banda_3_836.raw	1	1	612	625			PEAKS DB
1	5	A0A1S2XBN2|A0A1S2XBN2_CICAR	R.HGPVQM(+15.99)PYTLLHPSSK.E	Y	52.8	1806.91	16	1	452.735	4	52.49	2953900	1	18361	Banda_3_836.raw	1	1	832	847	Oxidation (M)	M6:Oxidation (M):1000.00	PEAKS DB
1	5	A0A1S2XBN2|A0A1S2XBN2_CICAR	R.DEAFGHLK.S	Y	51.9	915.445	8	10	458.73	2	49.24	131810000	1	16517	Banda_3_836.raw	1	1	264	271			PEAKS DB
1	5	A0A1S2XBN2|A0A1S2XBN2_CICAR	K.RGM(+15.99)ASWDSASPHGVK.L	Y	51.87	1600.74	15	6	534.588	3	51.59	3061400	1	17822	Banda_3_836.raw	1	1	611	625	Oxidation (M)	M3:Oxidation (M):1000.00	PEAKS DB
1	5	A0A1S2XBN2|A0A1S2XBN2_CICAR	K.E(-18.01)HLEPNLEGLTVEEAIQNK.K	Y	50.63	2144.07	19	-3	1073.04	2	50.98	2039100	1	17912	Banda_3_836.raw	1	1	408	426	Pyro-glu from E	E1:Pyro-glu from E:1000.00	PEAKS DB
1	5	A0A1S2XBN2|A0A1S2XBN2_CICAR	H.AVVEPFVIATNR.H	Y	50.56	1314.73	12	2	658.372	2	50.69	13645000	1	17767	Banda_3_836.raw	1	1	528	539			PEAKS DB
1	5	A0A1S2XBN2|A0A1S2XBN2_CICAR	R.YSM(+15.99)EMSSVIYK.D	Y	50.45	1352.6	11	29	677.309	2	43.95	18538000	1	13905	Banda_3_836.raw	1	1	585	595	Oxidation (M)	M3:Oxidation (M):15.21	PEAKS DB
1	5	A0A1S2XBN2|A0A1S2XBN2_CICAR	K.SAWM(+15.99)TDEEFVR.E	Y	50.16	1385.59	11	3	693.804	2	48.05	9526000	1	16241	Banda_3_836.raw	1	1	360	370	Oxidation (M)	M4:Oxidation (M):1000.00	PEAKS DB
1	5	A0A1S2XBN2|A0A1S2XBN2_CICAR	R.RINSTSTK.A	N	48.26	905.493	8	-13	453.753	2	46.91	54706000	1	15288	Banda_3_836.raw	1	1	443	450			PEAKS DB
1	5	A0A1S2XBN2|A0A1S2XBN2_CICAR	R.IFFANQTYLPSETPSPLAH.Y	Y	47.69	2132.06	19	19	711.695	3	52.62	23414000	1	18887	Banda_3_836.raw	2	2	163	181			PEAKS DB
1	5	A0A1S2XBN2|A0A1S2XBN2_CICAR	K.LPTDIISKISPLPVLK.E	N	46.15	1733.07	16	8	578.698	3	55.5	353530	1	20108	Banda_3_836.raw	1	1	321	336			PEAKS DB
1	5	A0A1S2XBN2|A0A1S2XBN2_CICAR	R.GM(+15.99)ASWDSASPHGVK.L	Y	46.12	1444.64	14	-3	482.554	3	47.95	91567000	1	16158	Banda_3_836.raw	2	2	612	625	Oxidation (M)	M2:Oxidation (M):1000.00	PEAKS DB
1	5	A0A1S2XBN2|A0A1S2XBN2_CICAR	H.LEPNLEGLTVEEAIQNK.K	Y	45.95	1895.98	17	2	949	2	50.6	142300	1	17647	Banda_3_836.raw	1	1	410	426			PEAKS DB
1	5	A0A1S2XBN2|A0A1S2XBN2_CICAR	H.LEPNLEGLTVEEAIQNKK.L	Y	45.73	2024.08	18	3	675.701	3	52.44	1490100	1	18435	Banda_3_836.raw	1	1	410	427			PEAKS DB
1	5	A0A1S2XBN2|A0A1S2XBN2_CICAR	K.EFPPQSK.L	Y	45.21	831.413	7	-18	832.418	1	28.15	2799100	1	7129	Banda_3_836.raw	1	1	386	392			PEAKS DB
1	5	A0A1S2XBN2|A0A1S2XBN2_CICAR	R.GM(+15.99)ASWDSASPHGV.K	Y	44.69	1316.55	13	18	659.281	2	39.66	1735700	1	11811	Banda_3_836.raw	1	1	612	624	Oxidation (M)	M2:Oxidation (M):1000.00	PEAKS DB
1	5	A0A1S2XBN2|A0A1S2XBN2_CICAR	K.LAEIEQK.L	N	44.34	829.455	7	6	830.462	1	28.24	1517000	1	6824	Banda_3_836.raw	2	2	812	818			PEAKS DB
1	5	A0A1S2XBN2|A0A1S2XBN2_CICAR	K.LPTDIISK.I	N	43.18	885.517	8	41	443.768	2	43.86	412090000	1	13925	Banda_3_836.raw	2	2	321	328			PEAKS DB
1	5	A0A1S2XBN2|A0A1S2XBN2_CICAR	S.SLPTLGAGQSAFR.I	Y	41.24	1303.69	13	5	652.852	2	48.35	4886600	1	16139	Banda_3_836.raw	1	1	91	103			PEAKS DB
1	5	A0A1S2XBN2|A0A1S2XBN2_CICAR	R.GIPNSISI	N	39.84	799.444	8	11	800.452	1	40.63	18224000	1	12472	Banda_3_836.raw	1	1	854	861			PEAKS DB
1	5	A0A1S2XBN2|A0A1S2XBN2_CICAR	K.DPNSESR.S	Y	39.66	803.341	7	10	402.678	2	17.63	2174900	1	2853	Banda_3_836.raw	1	1	249	255			PEAKS DB
2	1	A0A3Q7YAD4|A0A3Q7YAD4_CICAR	K.NVLDYNTIISIGGGNVR.G	Y	101.21	1803.95	17	9	902.982	2	52.35	34916000	1	18563	Banda_3_836.raw	2	2	25	41			PEAKS DB
2	1	A0A3Q7YAD4|A0A3Q7YAD4_CICAR	K.ITADVM(+15.99)ELDGC(+57.02)TIEEALASGR.L	Y	92.67	2266.05	21	4	1134.03	2	51.95	5586500	1	18271	Banda_3_836.raw	1	1	405	425	Oxidation (M); Carbamidomethylation	M6:Oxidation (M):1000.00;C11:Carbamidomethylation:1000.00	PEAKS DB
2	1	A0A3Q7YAD4|A0A3Q7YAD4_CICAR	R.KNVLDYNTIISIGGGNVR.G	Y	92.36	1932.04	18	13	967.03	2	53.1	7627400	1	18859	Banda_3_836.raw	2	2	24	41			PEAKS DB
2	1	A0A3Q7YAD4|A0A3Q7YAD4_CICAR	K.SNLDPTIYGDQTSK.I	Y	92.33	1537.73	14	11	769.871	2	36.35	143090000	1	10229	Banda_3_836.raw	1	1	391	404			PEAKS DB
2	1	A0A3Q7YAD4|A0A3Q7YAD4_CICAR	M(+15.99)(+42.01)FSGVTGILNK.G	Y	89.24	1223.62	11	9	1224.63	1	45.7	70006000	1	14866	Banda_3_836.raw	2	2	1	11	Oxidation (M); Acetylation (Protein N-term)	M1:Oxidation (M):1000.00;M1:Acetylation (Protein N-term):1000.00	PEAKS DB
2	1	A0A3Q7YAD4|A0A3Q7YAD4_CICAR	K.YGVEM(+15.99)SSAVYK.N	Y	87.87	1248.57	11	1	625.292	2	34.31	54676000	1	9353	Banda_3_836.raw	1	1	583	593	Oxidation (M)	M5:Oxidation (M):1000.00	PEAKS DB
2	1	A0A3Q7YAD4|A0A3Q7YAD4_CICAR	R.QSLINADGIIEK.T	Y	87.03	1299.7	12	6	650.859	2	47.55	66507000	1	15735	Banda_3_836.raw	1	1	565	576			PEAKS DB
2	1	A0A3Q7YAD4|A0A3Q7YAD4_CICAR	R.HASDEVYLGER.E	N	85.36	1274.59	11	15	638.303	2	49.31	58085000	1	16466	Banda_3_836.raw	2	2	778	788			PEAKS DB
2	1	A0A3Q7YAD4|A0A3Q7YAD4_CICAR	K.NWVFPDQALPNDLIK.R	Y	85.1	1768.91	15	8	885.465	2	54.79	65667000	1	20014	Banda_3_836.raw	2	2	594	608			PEAKS DB
2	1	A0A3Q7YAD4|A0A3Q7YAD4_CICAR	K.TYLPSETPSPLVK.Y	Y	84.2	1430.77	13	0	716.39	2	47.18	142560000	1	15350	Banda_3_836.raw	2	2	170	182			PEAKS DB
2	1	A0A3Q7YAD4|A0A3Q7YAD4_CICAR	K.EVVEEGHGDLK.D	Y	81.91	1210.58	11	6	606.299	2	47.27	71951000	1	15647	Banda_3_836.raw	2	2	672	682			PEAKS DB
2	1	A0A3Q7YAD4|A0A3Q7YAD4_CICAR	R.LLPEQGTSQYEEM(+15.99)VK.S	Y	81.69	1766.84	15	10	884.428	2	37.96	48702000	1	11296	Banda_3_836.raw	1	1	735	749	Oxidation (M)	M13:Oxidation (M):1000.00	PEAKS DB
2	1	A0A3Q7YAD4|A0A3Q7YAD4_CICAR	K.LPLDVISTISPLPVIK.E	Y	80.11	1704.04	16	19	853.031	2	56.57	168150000	1	20896	Banda_3_836.raw	2	2	321	336			PEAKS DB
2	1	A0A3Q7YAD4|A0A3Q7YAD4_CICAR	M(+42.01)FSGVTGILNK.G	Y	79.65	1207.63	11	4	604.821	2	54.56	1392000	1	19964	Banda_3_836.raw	1	1	1	11	Acetylation (Protein N-term)	M1:Acetylation (Protein N-term):1000.00	PEAKS DB
2	1	A0A3Q7YAD4|A0A3Q7YAD4_CICAR	K.YGVEMSSAVYK.N	Y	75.92	1232.57	11	25	617.296	2	44.16	26767000	1	14069	Banda_3_836.raw	1	1	583	593			PEAKS DB
2	1	A0A3Q7YAD4|A0A3Q7YAD4_CICAR	R.DTM(+15.99)NINALAR.Q	N	73.4	1133.55	10	15	567.783	2	33.45	276160000	1	8916	Banda_3_836.raw	1	1	555	564	Oxidation (M)	M3:Oxidation (M):1000.00	PEAKS DB
2	1	A0A3Q7YAD4|A0A3Q7YAD4_CICAR	R.Q(-17.03)SLINADGIIEK.T	Y	72.43	1282.68	12	31	642.348	2	43.33	51213000	1	13748	Banda_3_836.raw	1	1	565	576	Pyro-glu from Q	Q1:Pyro-glu from Q:1000.00	PEAKS DB
2	1	A0A3Q7YAD4|A0A3Q7YAD4_CICAR	K.LQTLIDLSVIEILSR.H	N	72.36	1712.01	15	13	857.013	2	60.13	92118	1	22261	Banda_3_836.raw	1	1	763	777			PEAKS DB
2	1	A0A3Q7YAD4|A0A3Q7YAD4_CICAR	R.SVSLQLISATK.S	N	71.93	1145.67	11	10	573.841	2	48.68	457810000	1	16476	Banda_3_836.raw	2	2	65	75			PEAKS DB
2	1	A0A3Q7YAD4|A0A3Q7YAD4_CICAR	R.DTMNINALAR.Q	N	71.21	1117.55	10	38	559.787	2	44.07	79803000	1	14062	Banda_3_836.raw	1	1	555	564			PEAKS DB
2	1	A0A3Q7YAD4|A0A3Q7YAD4_CICAR	K.SSDFLTYGIK.S	N	67.27	1129.57	10	3	565.79	2	49.71	87926000	1	17018	Banda_3_836.raw	2	2	273	282			PEAKS DB
2	1	A0A3Q7YAD4|A0A3Q7YAD4_CICAR	Q.VILPANEGVESTIWLLAK.A	Y	66.9	1952.1	18	11	977.058	2	56.44	6640100	1	20406	Banda_3_836.raw	1	1	487	504			PEAKS DB
2	1	A0A3Q7YAD4|A0A3Q7YAD4_CICAR	N.LIGSTVDGLTAFLGR.S	Y	66.36	1518.84	15	10	760.428	2	55.72	433260	1	20184	Banda_3_836.raw	1	1	50	64			PEAKS DB
2	1	A0A3Q7YAD4|A0A3Q7YAD4_CICAR	K.ITADVMELDGC(+57.02)TIEEALASGR.L	Y	66.07	2250.05	21	11	1126.03	2	54.76	3551500	1	20038	Banda_3_836.raw	1	1	405	425	Carbamidomethylation	C11:Carbamidomethylation:1000.00	PEAKS DB
2	1	A0A3Q7YAD4|A0A3Q7YAD4_CICAR	K.SEKPATEVYVPR.D	Y	65.88	1374.71	12	-16	459.245	3	48.79	112960000	1	16017	Banda_3_836.raw	1	1	253	264			PEAKS DB
2	1	A0A3Q7YAD4|A0A3Q7YAD4_CICAR	R.EEELHNLR.G	N	62.91	1038.51	8	0	520.262	2	48.4	5544000	1	16420	Banda_3_836.raw	1	1	185	192			PEAKS DB
2	1	A0A3Q7YAD4|A0A3Q7YAD4_CICAR	K.FPEPHIIQVSK.S	Y	62.8	1293.71	11	-4	432.243	3	52.35	72731000	1	18147	Banda_3_836.raw	2	2	349	359			PEAKS DB
2	1	A0A3Q7YAD4|A0A3Q7YAD4_CICAR	R.TDGEQVLK.F	N	62.23	888.455	8	-23	445.234	2	21.7	395180000	1	4345	Banda_3_836.raw	3	3	341	348			PEAKS DB
2	1	A0A3Q7YAD4|A0A3Q7YAD4_CICAR	K.TWVQDYVSLYYATDDDIK.I	Y	59.66	2194.01	18	-4	1098.01	2	55.83	664350	1	20165	Banda_3_836.raw	1	1	644	661			PEAKS DB
2	1	A0A3Q7YAD4|A0A3Q7YAD4_CICAR	K.DSSSPYGLR.L	Y	58.42	980.456	9	-8	491.235	2	33.2	9822000	1	9134	Banda_3_836.raw	1	1	615	623			PEAKS DB
2	1	A0A3Q7YAD4|A0A3Q7YAD4_CICAR	R.E(-18.01)EELHNLR.G	N	54.8	1020.5	8	6	511.257	2	39.91	752100	1	12233	Banda_3_836.raw	1	1	185	192	Pyro-glu from E	E1:Pyro-glu from E:1000.00	PEAKS DB
2	1	A0A3Q7YAD4|A0A3Q7YAD4_CICAR	D.PTIYGDQTSK.I	Y	54.4	1108.54	10	-21	555.276	2	29.23	14545000	1	7370	Banda_3_836.raw	1	1	395	404			PEAKS DB
2	1	A0A3Q7YAD4|A0A3Q7YAD4_CICAR	K.SAWM(+15.99)TDEEFAR.E	N	53.02	1357.56	11	-3	679.788	2	46.71	36602000	1	15137	Banda_3_836.raw	1	1	360	370	Oxidation (M)	M4:Oxidation (M):1000.00	PEAKS DB
2	1	A0A3Q7YAD4|A0A3Q7YAD4_CICAR	R.Q(-17.03)LSVLHPIHK.L	N	51.8	1153.66	10	0	577.838	2	52.21	14386000	1	18635	Banda_3_836.raw	1	1	538	547	Pyro-glu from Q	Q1:Pyro-glu from Q:1000.00	PEAKS DB
2	1	A0A3Q7YAD4|A0A3Q7YAD4_CICAR	K.ALQAFQK.F	N	50.9	804.449	7	14	805.458	1	38.77	240500	1	11620	Banda_3_836.raw	1	1	799	805			PEAKS DB
2	1	A0A3Q7YAD4|A0A3Q7YAD4_CICAR	R.ENPHWTSDSK.A	Y	50.47	1199.52	10	3	600.768	2	47.35	11425000	1	15678	Banda_3_836.raw	1	1	789	798			PEAKS DB
2	1	A0A3Q7YAD4|A0A3Q7YAD4_CICAR	R.DLFEGGIK.L	Y	47.53	877.455	8	8	878.462	1	48.4	9990900	1	16129	Banda_3_836.raw	1	1	313	320			PEAKS DB
2	1	A0A3Q7YAD4|A0A3Q7YAD4_CICAR	R.FGPVQLPYTLLHPT.S	Y	47.37	1581.86	14	3	791.935	2	55.12	2629700	1	19853	Banda_3_836.raw	1	1	830	843			PEAKS DB
2	1	A0A3Q7YAD4|A0A3Q7YAD4_CICAR	R.LLPEQGTSQYEEMVK.S	Y	45.54	1750.84	15	14	876.431	2	45.67	6717100	1	14534	Banda_3_836.raw	1	1	735	749			PEAKS DB
2	1	A0A3Q7YAD4|A0A3Q7YAD4_CICAR	Y.TLLHPTSEEGLTFR.G	Y	40.33	1599.83	14	22	534.284	3	53.49	6280	1	18929	Banda_3_836.raw	1	1	838	851			PEAKS DB
2	1	A0A3Q7YAD4|A0A3Q7YAD4_CICAR	R.RINETSAK.A	Y	39.85	917.493	8	-14	459.753	2	47.16	37163000	1	15758	Banda_3_836.raw	1	1	441	448			PEAKS DB
2	1	A0A3Q7YAD4|A0A3Q7YAD4_CICAR	R.GIPNSISI	N	39.84	799.444	8	11	800.452	1	40.63	18224000	1	12472	Banda_3_836.raw	1	1	852	859			PEAKS DB
2	1	A0A3Q7YAD4|A0A3Q7YAD4_CICAR	R.INETSAK.A	Y	39.67	761.392	7	17	762.4	1	17.76	20460	1	2924	Banda_3_836.raw	1	1	442	448			PEAKS DB
8	4	A0A1S2XSB9|A0A1S2XSB9_CICAR	R.LHQNIDSSSSPDIYIPQAGR.I	Y	107.4	2197.08	20	3	733.366	3	49.8	34985000	1	16965	Banda_3_836.raw	2	2	344	363			PEAKS DB
8	4	A0A1S2XSB9|A0A1S2XSB9_CICAR	R.FYLAGNQEQEFLQYQQQEGR.K	Y	93.71	2475.15	20	-16	1238.58	2	49.55	747400	1	16967	Banda_3_836.raw	2	2	181	200			PEAKS DB
8	4	A0A1S2XSB9|A0A1S2XSB9_CICAR	R.IESEGGLIETWNPNNR.Q	Y	88.88	1827.88	16	15	914.946	2	48.81	1203000	1	16642	Banda_3_836.raw	1	1	45	60			PEAKS DB
8	4	A0A1S2XSB9|A0A1S2XSB9_CICAR	K.TVTSFDLPALR.W	N	82.25	1218.66	11	6	610.338	2	51.92	7412000	1	18348	Banda_3_836.raw	1	1	366	376			PEAKS DB
8	4	A0A1S2XSB9|A0A1S2XSB9_CICAR	K.LVGATSSLSSIPEDVIAATFNMER.N	Y	74.95	2507.26	24	8	836.761	3	58.86	6517600	1	21812	Banda_3_836.raw	1	1	468	491			PEAKS DB
8	4	A0A1S2XSB9|A0A1S2XSB9_CICAR	R.DFLEDALNVNR.H	N	73.6	1304.64	11	4	653.326	2	52.59	28622000	1	18740	Banda_3_836.raw	1	1	218	228			PEAKS DB
8	4	A0A1S2XSB9|A0A1S2XSB9_CICAR	R.ALIVPQNFAVAAK.S	Y	73.51	1340.78	13	20	671.399	2	50.24	40875000	1	17507	Banda_3_836.raw	1	1	434	446			PEAKS DB
8	4	A0A1S2XSB9|A0A1S2XSB9_CICAR	K.EEQENEGNNIFSGFR.R	Y	67.55	1768.77	15	19	885.392	2	49.12	1865800	1	16890	Banda_3_836.raw	1	1	202	216			PEAKS DB
8	4	A0A1S2XSB9|A0A1S2XSB9_CICAR	K.SSNPFTFLVPPR.E	Y	63.85	1360.71	12	11	681.365	2	54.54	28577000	1	19856	Banda_3_836.raw	2	2	499	510			PEAKS DB
8	4	A0A1S2XSB9|A0A1S2XSB9_CICAR	R.LQVVNC(+57.02)NGNNVFDGELEAGR.A	Y	51.78	2204.03	20	14	735.684	3	47.73	461260	1	15772	Banda_3_836.raw	1	1	414	433	Carbamidomethylation	C6:Carbamidomethylation:1000.00	PEAKS DB
8	4	A0A1S2XSB9|A0A1S2XSB9_CICAR	R.KEEQENEGNNIFSGFR.R	Y	51.66	1896.86	16	20	949.439	2	52.21	1366800	1	18119	Banda_3_836.raw	1	1	201	216			PEAKS DB
8	4	A0A1S2XSB9|A0A1S2XSB9_CICAR	R.DEDEEKGAIVK.V	Y	51.17	1231.59	11	14	616.805	2	42.37	0	1	13162	Banda_3_836.raw	0	0	238	248			PEAKS DB
8	4	A0A1S2XSB9|A0A1S2XSB9_CICAR	R.Q(-17.03)DEDEDEKR.R	N	49.73	1145.45	9	5	573.731	2	17.76	1890800	1	2916	Banda_3_836.raw	1	1	291	299	Pyro-glu from Q	Q1:Pyro-glu from Q:1000.00	PEAKS DB
8	4	A0A1S2XSB9|A0A1S2XSB9_CICAR	K.GGLSFISPSEK.Q	Y	48.84	1120.58	11	5	561.296	2	48.15	23663000	1	16286	Banda_3_836.raw	1	1	251	261			PEAKS DB
8	4	A0A1S2XSB9|A0A1S2XSB9_CICAR	R.QEEDEDEDEDEK.R	Y	41.11	1508.53	12	4	755.271	2	18.26	6621.3	1	3125	Banda_3_836.raw	1	1	271	282			PEAKS DB
9	11	A0A1S2XET4|A0A1S2XET4_CICAR	R.IQAQGPGNQVDQGR.G	Y	96.98	1466.72	14	16	734.37	2	25.7	9009600	1	5922	Banda_3_836.raw	1	1	475	488			PEAKS DB
9	11	A0A1S2XET4|A0A1S2XET4_CICAR	R.NQAQENAM(+15.99)EAISGAQER.Y	Y	83.83	1861.82	17	2	931.919	2	31.24	2433500	1	8119	Banda_3_836.raw	1	1	222	238	Oxidation (M)	M8:Oxidation (M):1000.00	PEAKS DB
9	11	A0A1S2XET4|A0A1S2XET4_CICAR	K.KPTNETLTNTTQTAQGK.E	Y	68.86	1831.93	17	-3	611.65	3	42.18	6045100	1	13227	Banda_3_836.raw	2	2	244	260			PEAKS DB
9	11	A0A1S2XET4|A0A1S2XET4_CICAR	K.AAANVVEGAAR.Y	Y	66.81	1027.54	11	-41	514.776	2	29.7	15466000	1	7341	Banda_3_836.raw	1	1	383	393			PEAKS DB
9	11	A0A1S2XET4|A0A1S2XET4_CICAR	K.VIVVGEGDVEEK.Q	Y	64.04	1271.66	12	5	636.838	2	39.16	5348300	1	11541	Banda_3_836.raw	1	1	625	636			PEAKS DB
9	11	A0A1S2XET4|A0A1S2XET4_CICAR	K.GLAASAGESAK.E	Y	61.52	960.487	11	-7	481.251	2	26.42	6491600	1	6289	Banda_3_836.raw	1	1	412	422			PEAKS DB
9	11	A0A1S2XET4|A0A1S2XET4_CICAR	R.GSNVVSSIGETVGK.L	Y	56.74	1332.69	14	10	667.352	2	42.64	10721000	1	13239	Banda_3_836.raw	1	1	489	502			PEAKS DB
9	11	A0A1S2XET4|A0A1S2XET4_CICAR	R.DVGNFEVESK.G	Y	51.08	1122.52	10	10	562.268	2	35.19	7996700	1	9914	Banda_3_836.raw	1	1	111	120			PEAKS DB
9	11	A0A1S2XET4|A0A1S2XET4_CICAR	K.ETVSDIGNNM(+15.99)IK.S	Y	47.69	1335.63	12	8	668.825	2	31.78	5051800	1	8465	Banda_3_836.raw	1	1	578	589	Oxidation (M)	M10:Oxidation (M):1000.00	PEAKS DB
9	11	A0A1S2XET4|A0A1S2XET4_CICAR	R.LGYGAENER.A	Y	44.66	1007.47	9	-5	504.741	2	31.39	10536000	1	8712	Banda_3_836.raw	2	2	177	185			PEAKS DB
9	11	A0A1S2XET4|A0A1S2XET4_CICAR	R.LTLEEISK.Y	Y	43.85	931.523	8	-19	466.768	2	46.79	4747100	1	15008	Banda_3_836.raw	1	1	212	219			PEAKS DB
9	11	A0A1S2XET4|A0A1S2XET4_CICAR	R.ETHELGSNFDSLSDR.N	Y	42.65	1705.75	15	38	853.888	2	50.22	347470	1	17335	Banda_3_836.raw	1	1	76	90			PEAKS DB
9	11	A0A1S2XET4|A0A1S2XET4_CICAR	K.TELGTGQVVAEK.A	Y	42.09	1230.65	12	13	616.331	2	33.08	11534000	1	8813	Banda_3_836.raw	1	1	153	164			PEAKS DB
9	11	A0A1S2XET4|A0A1S2XET4_CICAR	K.GEQNFGTGR.L	Y	41.08	964.436	9	-6	483.225	2	26.58	7312200	1	6353	Banda_3_836.raw	1	1	168	176			PEAKS DB
9	11	A0A1S2XET4|A0A1S2XET4_CICAR	K.RASQPLQEGEYIPTSEGIGENVSNYTQK.M	Y	40.5	3094.48	28	-12	1032.5	3	49.41	491270	1	16685	Banda_3_836.raw	1	1	440	467			PEAKS DB
9	11	A0A1S2XET4|A0A1S2XET4_CICAR	K.AIGDIGGTGK.T	Y	39.88	887.471	10	3	444.743	2	32.45	6368800	1	9256	Banda_3_836.raw	1	1	64	73			PEAKS DB
6	8	A0A1S2Y087|A0A1S2Y087_CICAR	R.NFLAGEDDNVISQIQNPVK.E	Y	88.89	2100.05	19	16	1051.03	2	50.72	14541000	1	17586	Banda_3_836.raw	1	1	525	543			PEAKS DB
6	8	A0A1S2Y087|A0A1S2Y087_CICAR	R.VLLEEQEPEQSR.G	Y	76.71	1455.72	12	14	728.869	2	37.98	42579000	1	11228	Banda_3_836.raw	1	1	331	342			PEAKS DB
6	8	A0A1S2Y087|A0A1S2Y087_CICAR	K.ELTFPGSAQEVNR.L	Y	68.18	1446.71	13	7	724.363	2	45.63	27561000	1	14882	Banda_3_836.raw	1	1	544	556			PEAKS DB
6	8	A0A1S2Y087|A0A1S2Y087_CICAR	R.QSYFANAQPQQR.E	Y	67.07	1436.68	12	12	719.348	2	35.19	0	1	9887	Banda_3_836.raw	0	0	563	574			PEAKS DB
6	8	A0A1S2Y087|A0A1S2Y087_CICAR	R.Q(-17.03)SYFANAQPQQR.E	Y	66.86	1419.65	12	9	710.835	2	32.56	9844300	1	8576	Banda_3_836.raw	1	1	563	574	Pyro-glu from Q	Q1:Pyro-glu from Q:1000.00	PEAKS DB
6	8	A0A1S2Y087|A0A1S2Y087_CICAR	R.GSEESEEGDAIVK.V	Y	61.09	1348.6	13	-23	675.305	2	27.94	1743000	1	6655	Banda_3_836.raw	1	1	346	358			PEAKS DB
6	8	A0A1S2Y087|A0A1S2Y087_CICAR	K.LPAGTTAYLANHDDEEDLR.V	Y	60.82	2099.98	19	4	1051	2	50.14	1247000	1	17006	Banda_3_836.raw	2	2	262	280			PEAKS DB
6	8	A0A1S2Y087|A0A1S2Y087_CICAR	R.NPIYSNK.F	N	59.63	834.423	7	-43	835.427	1	28.4	0	1	7045	Banda_3_836.raw	0	0	392	398			PEAKS DB
6	8	A0A1S2Y087|A0A1S2Y087_CICAR	R.SNLFQNLQNYR.F	Y	58.61	1395.69	11	1	698.852	2	51.3	8140200	1	17629	Banda_3_836.raw	1	1	199	209			PEAKS DB
6	8	A0A1S2Y087|A0A1S2Y087_CICAR	R.VVELAIPVNRPGK.F	Y	58.44	1390.83	13	-4	464.617	3	51.55	12098000	1	18325	Banda_3_836.raw	1	1	281	293			PEAKS DB
6	8	A0A1S2Y087|A0A1S2Y087_CICAR	K.AILTVLNPNDR.N	N	58.12	1224.68	11	9	613.349	2	50.54	60807000	1	17534	Banda_3_836.raw	1	1	239	249			PEAKS DB
6	8	A0A1S2Y087|A0A1S2Y087_CICAR	R.NSFNLER.G	Y	51.99	878.425	7	-7	440.219	2	41.85	23102000	1	12814	Banda_3_836.raw	1	1	250	256			PEAKS DB
6	8	A0A1S2Y087|A0A1S2Y087_CICAR	R.NEQQEQQQEEDEEQEEEER.N	Y	51.52	2461.96	19	7	1231.99	2	23.83	706410	1	5011	Banda_3_836.raw	1	1	459	477			PEAKS DB
6	8	A0A1S2Y087|A0A1S2Y087_CICAR	K.FFEITPEK.S	N	44.22	1009.51	8	-1	505.763	2	49.32	28175000	1	16805	Banda_3_836.raw	1	1	402	409			PEAKS DB
6	8	A0A1S2Y087|A0A1S2Y087_CICAR	R.EQIEELSK.H	N	40.89	974.492	8	-4	488.253	2	31.14	9574000	1	7972	Banda_3_836.raw	1	1	362	369			PEAKS DB
6	8	A0A1S2Y087|A0A1S2Y087_CICAR	R.GDTEETR.F	Y	39.83	806.341	7	-3	404.177	2	17.71	244360	1	2891	Banda_3_836.raw	1	1	129	135			PEAKS DB
6	8	A0A1S2Y087|A0A1S2Y087_CICAR	R.E(-18.01)QIEELSK.H	N	39.33	956.481	8	-3	957.489	1	31.34	187840	1	8091	Banda_3_836.raw	1	1	362	369	Pyro-glu from E	E1:Pyro-glu from E:1000.00	PEAKS DB
11	12	A0A3Q7XNW1|A0A3Q7XNW1_CICAR	R.LHQNIGSSSSPDIYNPQAGR.I	N	98.81	2140.03	20	3	1071.02	2	48.08	47959000	1	16229	Banda_3_836.raw	2	2	325	344			PEAKS DB
11	12	A0A3Q7XNW1|A0A3Q7XNW1_CICAR	K.TVTSFDLPALR.F	N	82.25	1218.66	11	6	610.338	2	51.92	7412000	1	18348	Banda_3_836.raw	1	1	347	357			PEAKS DB
11	12	A0A3Q7XNW1|A0A3Q7XNW1_CICAR	R.DFLEDALNVNR.R	N	73.6	1304.64	11	4	653.326	2	52.59	28622000	1	18740	Banda_3_836.raw	1	1	219	229			PEAKS DB
11	12	A0A3Q7XNW1|A0A3Q7XNW1_CICAR	K.FNSPFSFLVPPR.S	Y	72.62	1406.73	12	8	704.375	2	56.35	1351000	1	20771	Banda_3_836.raw	2	2	480	491			PEAKS DB
11	12	A0A3Q7XNW1|A0A3Q7XNW1_CICAR	K.SEGGLIETWNPSNK.Q	N	58.8	1530.73	14	17	766.374	2	48.07	28764000	1	16093	Banda_3_836.raw	1	1	47	60			PEAKS DB
11	12	A0A3Q7XNW1|A0A3Q7XNW1_CICAR	K.GNSVFDGELEAGR.A	N	58.51	1349.62	13	19	675.819	2	44.92	0	1	14384	Banda_3_836.raw	0	0	402	414			PEAKS DB
11	12	A0A3Q7XNW1|A0A3Q7XNW1_CICAR	K.GGLSIITPPEKEPR.Q	Y	50.36	1492.82	14	-11	498.615	3	51.3	27819000	1	17751	Banda_3_836.raw	1	1	252	265			PEAKS DB
11	12	A0A3Q7XNW1|A0A3Q7XNW1_CICAR	R.Q(-17.03)DEDEDEKR.Q	N	49.73	1145.45	9	5	573.731	2	17.76	1890800	1	2916	Banda_3_836.raw	1	1	290	298	Pyro-glu from Q	Q1:Pyro-glu from Q:1000.00	PEAKS DB
11	12	A0A3Q7XNW1|A0A3Q7XNW1_CICAR	R.LLGASSLINGMPEEVVAAAFNMER.N	Y	47.42	2518.26	24	12	840.427	3	59.76	790770	1	22173	Banda_3_836.raw	1	1	449	472			PEAKS DB
11	12	A0A3Q7XNW1|A0A3Q7XNW1_CICAR	R.DQPEQNEC(+57.02)QLEHLNALEPDNR.I	Y	46.07	2548.12	21	12	850.383	3	48.16	2394200	1	15820	Banda_3_836.raw	1	1	24	44	Carbamidomethylation	C8:Carbamidomethylation:1000.00	PEAKS DB
11	12	A0A3Q7XNW1|A0A3Q7XNW1_CICAR	R.ATLQPNSLR.R	Y	42.54	998.551	9	6	500.283	2	36.19	35497000	1	10265	Banda_3_836.raw	1	1	72	80			PEAKS DB
11	12	A0A3Q7XNW1|A0A3Q7XNW1_CICAR	R.ALIVPQNFAIAAK.S	N	41.59	1354.8	13	0	678.406	2	51.4	48409000	1	18094	Banda_3_836.raw	1	1	415	427			PEAKS DB
11	12	A0A3Q7XNW1|A0A3Q7XNW1_CICAR	R.LLGASSLINGMPEEVVAAAFNM(+15.99)ER.N	Y	41.35	2534.25	24	13	845.759	3	57.41	1570600	1	21075	Banda_3_836.raw	1	1	449	472	Oxidation (M)	M22:Oxidation (M):54.41	PEAKS DB
10	10	A0A1S2XQR4|A0A1S2XQR4_CICAR	K.ILEASFNSDYEEIER.V	N	86.65	1813.84	15	25	907.928	2	48.44	19835000	1	16349	Banda_3_836.raw	1	1	176	190			PEAKS DB
10	10	A0A1S2XQR4|A0A1S2XQR4_CICAR	K.EVAFPGSAEEVDR.L	N	82.47	1404.65	13	17	703.335	2	42.81	31373000	1	13268	Banda_3_836.raw	1	1	407	419			PEAKS DB
10	10	A0A1S2XQR4|A0A1S2XQR4_CICAR	R.Q(-17.03)SHFANAQPQQK.D	N	65.78	1365.64	12	-10	683.828	2	26.9	10592000	1	6517	Banda_3_836.raw	1	1	426	437	Pyro-glu from Q	Q1:Pyro-glu from Q:1000.00	PEAKS DB
10	10	A0A1S2XQR4|A0A1S2XQR4_CICAR	R.NFLAGEEDNVISQIQRPVK.E	N	62.79	2156.12	19	19	719.716	3	53.36	15251000	1	19125	Banda_3_836.raw	2	2	388	406			PEAKS DB
10	10	A0A1S2XQR4|A0A1S2XQR4_CICAR	K.LPAGTIAYLANR.D	N	61.79	1258.7	12	-11	630.358	2	49.49	16274000	1	17120	Banda_3_836.raw	1	1	122	133			PEAKS DB
10	10	A0A1S2XQR4|A0A1S2XQR4_CICAR	R.NPIYSNK.Y	N	59.63	834.423	7	-43	835.427	1	28.4	0	1	7045	Banda_3_836.raw	0	0	256	262			PEAKS DB
10	10	A0A1S2XQR4|A0A1S2XQR4_CICAR	R.AILTVLNPNDR.N	N	58.12	1224.68	11	9	613.349	2	50.54	60807000	1	17534	Banda_3_836.raw	1	1	99	109			PEAKS DB
10	10	A0A1S2XQR4|A0A1S2XQR4_CICAR	K.YGNFFEITPEK.N	N	57.96	1343.64	11	15	672.828	2	51.72	10109000	1	17836	Banda_3_836.raw	1	1	263	273			PEAKS DB
10	10	A0A1S2XQR4|A0A1S2XQR4_CICAR	R.SQLFENLQNYR.L	N	57.76	1410.69	11	-13	706.351	2	49.94	17109000	1	17314	Banda_3_836.raw	1	1	59	69			PEAKS DB
10	10	A0A1S2XQR4|A0A1S2XQR4_CICAR	N.EGSLLLPHFNSR.A	N	50.97	1368.71	12	-13	457.245	3	53.54	67820	1	19046	Banda_3_836.raw	1	1	291	302			PEAKS DB
10	10	A0A1S2XQR4|A0A1S2XQR4_CICAR	K.GEVELVGLR.N	N	49.96	970.545	9	-9	971.551	1	48.6	421260	1	16058	Banda_3_836.raw	1	1	314	322			PEAKS DB
10	10	A0A1S2XQR4|A0A1S2XQR4_CICAR	K.SNNFQTLFK.N	Y	48.48	1097.55	9	21	549.784	2	50.24	18252000	1	17465	Banda_3_836.raw	1	1	35	43			PEAKS DB
10	10	A0A1S2XQR4|A0A1S2XQR4_CICAR	F.SLSGSENQQSYFQGFSK.K	Y	46.44	1892.85	17	-12	947.433	2	46.81	6137800	1	15159	Banda_3_836.raw	1	1	158	174			PEAKS DB
10	10	A0A1S2XQR4|A0A1S2XQR4_CICAR	N.FFEITPEK.N	N	44.22	1009.51	8	-1	505.763	2	49.32	28175000	1	16805	Banda_3_836.raw	1	1	266	273			PEAKS DB
10	10	A0A1S2XQR4|A0A1S2XQR4_CICAR	R.QEADVIVK.I	N	42.67	900.492	8	-12	451.252	2	31.41	7561500	1	8272	Banda_3_836.raw	1	1	215	222			PEAKS DB
10	10	A0A1S2XQR4|A0A1S2XQR4_CICAR	R.EQIEELSK.N	N	40.89	974.492	8	-4	488.253	2	31.14	9574000	1	7972	Banda_3_836.raw	1	1	226	233			PEAKS DB
10	10	A0A1S2XQR4|A0A1S2XQR4_CICAR	R.DDNEDLR.V	N	40.74	875.362	7	-4	438.688	2	17.82	1865800	1	2956	Banda_3_836.raw	1	1	134	140			PEAKS DB
10	10	A0A1S2XQR4|A0A1S2XQR4_CICAR	R.E(-18.01)QIEELSK.N	N	39.33	956.481	8	-3	957.489	1	31.34	187840	1	8091	Banda_3_836.raw	1	1	226	233	Pyro-glu from E	E1:Pyro-glu from E:1000.00	PEAKS DB
13	9	A0A1S2XQ88|A0A1S2XQ88_CICAR	K.ILEASFNSDYEEIER.V	N	86.65	1813.84	15	25	907.928	2	48.44	19835000	1	16349	Banda_3_836.raw	1	1	176	190			PEAKS DB
13	9	A0A1S2XQ88|A0A1S2XQ88_CICAR	K.EVAFPGSAEEVDR.L	N	82.47	1404.65	13	17	703.335	2	42.81	31373000	1	13268	Banda_3_836.raw	1	1	405	417			PEAKS DB
13	9	A0A1S2XQ88|A0A1S2XQ88_CICAR	R.Q(-17.03)QSQETDVIVK.I	Y	66.1	1256.62	11	-47	629.317	2	29.57	5057100	1	7441	Banda_3_836.raw	1	1	210	220	Pyro-glu from Q	Q1:Pyro-glu from Q:1000.00	PEAKS DB
13	9	A0A1S2XQ88|A0A1S2XQ88_CICAR	R.Q(-17.03)SHFANAQPQQK.R	N	65.78	1365.64	12	-10	683.828	2	26.9	10592000	1	6517	Banda_3_836.raw	1	1	424	435	Pyro-glu from Q	Q1:Pyro-glu from Q:1000.00	PEAKS DB
13	9	A0A1S2XQ88|A0A1S2XQ88_CICAR	R.NFLAGEEDNVISQIQRPVK.E	N	62.79	2156.12	19	19	719.716	3	53.36	15251000	1	19125	Banda_3_836.raw	2	2	386	404			PEAKS DB
13	9	A0A1S2XQ88|A0A1S2XQ88_CICAR	K.LPAGTIAYLANR.D	N	61.79	1258.7	12	-11	630.358	2	49.49	16274000	1	17120	Banda_3_836.raw	1	1	122	133			PEAKS DB
13	9	A0A1S2XQ88|A0A1S2XQ88_CICAR	R.AILTVLNPNDR.N	N	58.12	1224.68	11	9	613.349	2	50.54	60807000	1	17534	Banda_3_836.raw	1	1	99	109			PEAKS DB
13	9	A0A1S2XQ88|A0A1S2XQ88_CICAR	R.SQLFENLQNYR.L	N	57.76	1410.69	11	-13	706.351	2	49.94	17109000	1	17314	Banda_3_836.raw	1	1	59	69			PEAKS DB
13	9	A0A1S2XQ88|A0A1S2XQ88_CICAR	K.EGSLLLPHFNSR.A	N	50.97	1368.71	12	-13	457.245	3	53.54	67820	1	19046	Banda_3_836.raw	1	1	289	300			PEAKS DB
13	9	A0A1S2XQ88|A0A1S2XQ88_CICAR	K.GEVELVGLR.N	N	49.96	970.545	9	-9	971.551	1	48.6	421260	1	16058	Banda_3_836.raw	1	1	312	320			PEAKS DB
13	9	A0A1S2XQ88|A0A1S2XQ88_CICAR	R.FGNFFEITPEK.N	Y	48.74	1327.64	11	15	664.831	2	53.63	2031100	1	19375	Banda_3_836.raw	1	1	261	271			PEAKS DB
13	9	A0A1S2XQ88|A0A1S2XQ88_CICAR	K.DLDIFVNSVEIK.E	Y	48.25	1390.73	12	15	696.375	2	53.63	2293900	1	18983	Banda_3_836.raw	1	1	277	288			PEAKS DB
13	9	A0A1S2XQ88|A0A1S2XQ88_CICAR	N.FFEITPEK.N	N	44.22	1009.51	8	-1	505.763	2	49.32	28175000	1	16805	Banda_3_836.raw	1	1	264	271			PEAKS DB
13	9	A0A1S2XQ88|A0A1S2XQ88_CICAR	R.EQIEELSK.N	N	40.89	974.492	8	-4	488.253	2	31.14	9574000	1	7972	Banda_3_836.raw	1	1	224	231			PEAKS DB
13	9	A0A1S2XQ88|A0A1S2XQ88_CICAR	R.DDNEDLR.V	N	40.74	875.362	7	-4	438.688	2	17.82	1865800	1	2956	Banda_3_836.raw	1	1	134	140			PEAKS DB
13	9	A0A1S2XQ88|A0A1S2XQ88_CICAR	R.VLLEEQEQKPEQR.R	Y	39.35	1624.84	13	28	813.431	2	48.37	1465300	1	15954	Banda_3_836.raw	1	1	191	203			PEAKS DB
13	9	A0A1S2XQ88|A0A1S2XQ88_CICAR	R.E(-18.01)QIEELSK.N	N	39.33	956.481	8	-3	957.489	1	31.34	187840	1	8091	Banda_3_836.raw	1	1	224	231	Pyro-glu from E	E1:Pyro-glu from E:1000.00	PEAKS DB
28	27	sp|Q9SMJ4|LEG_CICAR	R.LHQNIGSSSSPDIYNPQAGR.I	N	98.81	2140.03	20	3	1071.02	2	48.08	47959000	1	16229	Banda_3_836.raw	2	2	322	341			PEAKS DB
28	27	sp|Q9SMJ4|LEG_CICAR	R.YQQEGSEEEENEGGNIFSGFK.R	Y	94.12	2377	21	5	1189.51	2	48.6	22187000	1	16518	Banda_3_836.raw	2	2	194	214			PEAKS DB
28	27	sp|Q9SMJ4|LEG_CICAR	R.DFLEDALNVNR.R	N	73.6	1304.64	11	4	653.326	2	52.59	28622000	1	18740	Banda_3_836.raw	1	1	216	226			PEAKS DB
28	27	sp|Q9SMJ4|LEG_CICAR	K.SEGGLIETWNPSNK.Q	N	58.8	1530.73	14	17	766.374	2	48.07	28764000	1	16093	Banda_3_836.raw	1	1	47	60			PEAKS DB
28	27	sp|Q9SMJ4|LEG_CICAR	K.GNSVFDGELEAGR.A	N	58.51	1349.62	13	19	675.819	2	44.92	0	1	14384	Banda_3_836.raw	0	0	400	412			PEAKS DB
28	27	sp|Q9SMJ4|LEG_CICAR	R.Q(-17.03)DEDEDEKR.Q	N	49.73	1145.45	9	5	573.731	2	17.76	1890800	1	2916	Banda_3_836.raw	1	1	287	295	Pyro-glu from Q	Q1:Pyro-glu from Q:1000.00	PEAKS DB
28	27	sp|Q9SMJ4|LEG_CICAR	R.ALIVPQNFAIAAK.S	N	41.59	1354.8	13	0	678.406	2	51.4	48409000	1	18094	Banda_3_836.raw	1	1	413	425			PEAKS DB
20	18	Q304D4|Q304D4_CICAR	K.EVAFPGSAEEVDR.L	N	82.47	1404.65	13	17	703.335	2	42.81	31373000	1	13268	Banda_3_836.raw	1	1	405	417			PEAKS DB
20	18	Q304D4|Q304D4_CICAR	R.QQSQSQSQQEADVIVK.I	Y	70.8	1801.88	16	-33	901.945	2	29.6	4289300	1	7622	Banda_3_836.raw	1	1	205	220			PEAKS DB
20	18	Q304D4|Q304D4_CICAR	R.Q(-17.03)SHFANAQPQQK.D	N	65.78	1365.64	12	-10	683.828	2	26.9	10592000	1	6517	Banda_3_836.raw	1	1	424	435	Pyro-glu from Q	Q1:Pyro-glu from Q:1000.00	PEAKS DB
20	18	Q304D4|Q304D4_CICAR	R.NFLAGEEDNVISQIQRPVK.E	N	62.79	2156.12	19	19	719.716	3	53.36	15251000	1	19125	Banda_3_836.raw	2	2	386	404			PEAKS DB
20	18	Q304D4|Q304D4_CICAR	R.NPIYSNK.Y	N	59.63	834.423	7	-43	835.427	1	28.4	0	1	7045	Banda_3_836.raw	0	0	254	260			PEAKS DB
20	18	Q304D4|Q304D4_CICAR	K.YGNFFEITPEK.N	N	57.96	1343.64	11	15	672.828	2	51.72	10109000	1	17836	Banda_3_836.raw	1	1	261	271			PEAKS DB
20	18	Q304D4|Q304D4_CICAR	N.EGSLLLPHFNSR.A	N	50.97	1368.71	12	-13	457.245	3	53.54	67820	1	19046	Banda_3_836.raw	1	1	289	300			PEAKS DB
20	18	Q304D4|Q304D4_CICAR	K.GEVELVGLR.N	N	49.96	970.545	9	-9	971.551	1	48.6	421260	1	16058	Banda_3_836.raw	1	1	312	320			PEAKS DB
20	18	Q304D4|Q304D4_CICAR	N.FFEITPEK.N	N	44.22	1009.51	8	-1	505.763	2	49.32	28175000	1	16805	Banda_3_836.raw	1	1	264	271			PEAKS DB
20	18	Q304D4|Q304D4_CICAR	Q.QEADVIVK.I	N	42.67	900.492	8	-12	451.252	2	31.41	7561500	1	8272	Banda_3_836.raw	1	1	213	220			PEAKS DB
20	18	Q304D4|Q304D4_CICAR	R.EQIEELSK.N	N	40.89	974.492	8	-4	488.253	2	31.14	9574000	1	7972	Banda_3_836.raw	1	1	224	231			PEAKS DB
20	18	Q304D4|Q304D4_CICAR	R.E(-18.01)QIEELSK.N	N	39.33	956.481	8	-3	957.489	1	31.34	187840	1	8091	Banda_3_836.raw	1	1	224	231	Pyro-glu from E	E1:Pyro-glu from E:1000.00	PEAKS DB
15	24	A0A1S2Y9D8|A0A1S2Y9D8_CICAR	R.ETALLYDDQNSAAANK.Q	Y	82.24	1722.81	16	11	862.411	2	37.96	9628700	1	10995	Banda_3_836.raw	1	1	283	298			PEAKS DB
15	24	A0A1S2Y9D8|A0A1S2Y9D8_CICAR	R.EIDEIFDAISYR.K	Y	65.66	1469.7	12	11	735.86	2	53.96	383900	1	19231	Banda_3_836.raw	1	1	382	393			PEAKS DB
15	24	A0A1S2Y9D8|A0A1S2Y9D8_CICAR	R.SQDAVFGLGVSQEGR.D	Y	54.9	1548.75	15	9	775.385	2	47.6	9177700	1	15473	Banda_3_836.raw	1	1	766	780			PEAKS DB
15	24	A0A1S2Y9D8|A0A1S2Y9D8_CICAR	K.TYGGGFLITR.F	Y	54.84	1083.57	10	12	542.794	2	50.72	5685300	1	17509	Banda_3_836.raw	1	1	797	806			PEAKS DB
15	24	A0A1S2Y9D8|A0A1S2Y9D8_CICAR	R.FVSAVVSPFASLEK.A	Y	54.18	1479.8	14	13	740.907	2	53.57	6271900	1	19126	Banda_3_836.raw	1	1	807	820			PEAKS DB
15	24	A0A1S2Y9D8|A0A1S2Y9D8_CICAR	R.NTPLLPPDIR.R	Y	48.53	1134.64	10	5	568.327	2	48.74	8037900	1	16094	Banda_3_836.raw	1	1	692	701			PEAKS DB
15	24	A0A1S2Y9D8|A0A1S2Y9D8_CICAR	R.VNINANWVQSVQNEK.S	Y	44.12	1741.87	15	10	871.946	2	47.08	1628100	1	15222	Banda_3_836.raw	1	1	847	861			PEAKS DB
15	24	A0A1S2Y9D8|A0A1S2Y9D8_CICAR	R.FGILDDTYALC(+57.02)MAGK.E	Y	43.05	1673.78	15	36	837.9	2	54.74	274140	1	19708	Banda_3_836.raw	1	1	569	583	Carbamidomethylation	C11:Carbamidomethylation:1000.00	PEAKS DB
15	24	A0A1S2Y9D8|A0A1S2Y9D8_CICAR	R.NM(+15.99)AVTQFEPADAR.R	Y	41.79	1464.67	13	-1	733.341	2	36.63	4508800	1	10518	Banda_3_836.raw	1	1	131	143	Oxidation (M)	M2:Oxidation (M):1000.00	PEAKS DB
15	24	A0A1S2Y9D8|A0A1S2Y9D8_CICAR	K.LNVEQAGFYR.V	Y	40.33	1195.6	10	8	598.807	2	47.44	8842500	1	15748	Banda_3_836.raw	1	1	534	543			PEAKS DB
15	24	A0A1S2Y9D8|A0A1S2Y9D8_CICAR	K.Q(-17.03)LLSPSDR.F	Y	39.2	897.456	8	-5	449.735	2	35.31	1508300	1	9822	Banda_3_836.raw	1	1	561	568	Pyro-glu from Q	Q1:Pyro-glu from Q:1000.00	PEAKS DB
27	23	A0A1S2XVM2|A0A1S2XVM2_CICAR	K.EGSSIINTTSVNAYK.G	Y	82.91	1582.78	15	17	792.4	2	40.98	19991000	1	12542	Banda_3_836.raw	1	1	206	220			PEAKS DB
27	23	A0A1S2XVM2|A0A1S2XVM2_CICAR	R.VVDEIINTYGR.I	Y	77.46	1277.66	11	-7	639.838	2	46.81	2602000	1	15263	Banda_3_836.raw	1	1	147	157			PEAKS DB
27	23	A0A1S2XVM2|A0A1S2XVM2_CICAR	K.IAVVTGGDSGIGR.S	Y	75.46	1200.65	13	-3	601.33	2	39.78	40567000	1	12163	Banda_3_836.raw	1	1	75	87			PEAKS DB
27	23	A0A1S2XVM2|A0A1S2XVM2_CICAR	K.DPM(+15.99)AIPADLGFDENC(+57.02)KR.V	Y	63.47	1963.88	17	10	655.634	3	49.8	460240	1	16988	Banda_3_836.raw	1	1	130	146	Oxidation (M); Carbamidomethylation	M3:Oxidation (M):1000.00;C15:Carbamidomethylation:1000.00	PEAKS DB
27	23	A0A1S2XVM2|A0A1S2XVM2_CICAR	R.IDILVNNAAEQYEC(+57.02)GSIEEIDEPR.L	Y	57.8	2776.29	24	-5	1389.15	2	50.41	772210	1	17218	Banda_3_836.raw	1	1	158	181	Carbamidomethylation	C14:Carbamidomethylation:1000.00	PEAKS DB
27	23	A0A1S2XVM2|A0A1S2XVM2_CICAR	R.VNGVAPGPIWTPLIPSSFK.E	Y	50.26	1979.09	19	20	990.553	2	59.79	722770	1	22118	Banda_3_836.raw	1	1	253	271			PEAKS DB
27	23	A0A1S2XVM2|A0A1S2XVM2_CICAR	R.ALSLQLVSK.G	Y	48.75	957.586	9	10	479.801	2	48.48	19866000	1	16242	Banda_3_836.raw	1	1	241	249			PEAKS DB
27	23	A0A1S2XVM2|A0A1S2XVM2_CICAR	R.VNGVAPGPIWTPLIPSSFKEDK.T	Y	44.2	2351.25	22	14	784.759	3	55.1	1662800	1	19745	Banda_3_836.raw	1	1	253	274			PEAKS DB
27	23	A0A1S2XVM2|A0A1S2XVM2_CICAR	K.GHPTLLDYTSTK.G	Y	42.39	1331.67	12	1	666.843	2	51.3	15217000	1	17616	Banda_3_836.raw	2	2	221	232			PEAKS DB
14	16	A0A1S2XYZ0|A0A1S2XYZ0_CICAR	R.Q(-17.03)SHFANAQSQGSQR.R	Y	75.15	1527.68	14	0	764.848	2	26.68	2916500	1	6410	Banda_3_836.raw	2	2	533	546	Pyro-glu from Q	Q1:Pyro-glu from Q:1000.00	PEAKS DB
14	16	A0A1S2XYZ0|A0A1S2XYZ0_CICAR	R.IVDLAIPINTPAK.F	Y	69.19	1363.81	13	9	682.912	2	50.3	157000	1	17493	Banda_3_836.raw	1	1	266	278			PEAKS DB
14	16	A0A1S2XYZ0|A0A1S2XYZ0_CICAR	K.LPAGTIAYLANR.D	N	61.79	1258.7	12	-11	630.358	2	49.49	16274000	1	17120	Banda_3_836.raw	1	1	247	258			PEAKS DB
14	16	A0A1S2XYZ0|A0A1S2XYZ0_CICAR	R.Q(-17.03)QSQEAEVIVK.V	Y	61.28	1240.63	11	-15	621.321	2	30.47	5842200	1	7764	Banda_3_836.raw	1	1	331	341	Pyro-glu from Q	Q1:Pyro-glu from Q:1000.00	PEAKS DB
14	16	A0A1S2XYZ0|A0A1S2XYZ0_CICAR	R.E(-18.01)EEEETSSESQGR.R	Y	53.25	1477.58	13	15	739.799	2	18.01	17835	1	3030	Banda_3_836.raw	1	1	140	152	Pyro-glu from E	E1:Pyro-glu from E:1000.00	PEAKS DB
14	16	A0A1S2XYZ0|A0A1S2XYZ0_CICAR	K.NILEASFNAK.Y	Y	52.05	1105.58	10	20	553.797	2	49.3	9222800	1	16683	Banda_3_836.raw	1	1	300	309			PEAKS DB
14	16	A0A1S2XYZ0|A0A1S2XYZ0_CICAR	K.GNFELVGLR.N	Y	50.82	1003.54	9	-4	502.78	2	51.17	6537500	1	17510	Banda_3_836.raw	1	1	433	441			PEAKS DB
14	16	A0A1S2XYZ0|A0A1S2XYZ0_CICAR	R.ATM(+15.99)VVVVNEGK.G	Y	48.44	1161.61	11	-38	581.808	2	29.64	3617600	1	7400	Banda_3_836.raw	1	1	422	432	Oxidation (M)	M3:Oxidation (M):1000.00	PEAKS DB
14	16	A0A1S2XYZ0|A0A1S2XYZ0_CICAR	R.NFLAGEDDNVISQIERPVK.E	Y	42.96	2143.09	19	12	1072.55	2	53.42	36110	1	18890	Banda_3_836.raw	1	1	495	513			PEAKS DB
14	16	A0A1S2XYZ0|A0A1S2XYZ0_CICAR	R.ILLEEPQQR.R	Y	41.63	1124.62	9	11	563.317	2	44.6	15638000	1	14232	Banda_3_836.raw	1	1	316	324			PEAKS DB
14	16	A0A1S2XYZ0|A0A1S2XYZ0_CICAR	R.EQIEELSK.H	N	40.89	974.492	8	-4	488.253	2	31.14	9574000	1	7972	Banda_3_836.raw	1	1	345	352			PEAKS DB
14	16	A0A1S2XYZ0|A0A1S2XYZ0_CICAR	R.E(-18.01)QIEELSK.H	N	39.33	956.481	8	-3	957.489	1	31.34	187840	1	8091	Banda_3_836.raw	1	1	345	352	Pyro-glu from E	E1:Pyro-glu from E:1000.00	PEAKS DB
21	26	A0A1S2XV08|A0A1S2XV08_CICAR	R.TPLMQLPVLIDLNGK.H	Y	78.02	1650.94	15	24	826.478	2	56.08	0	1	20385	Banda_3_836.raw	0	0	64	78			PEAKS DB
21	26	A0A1S2XV08|A0A1S2XV08_CICAR	R.QLEENLLLFDLVESK.L	Y	72.66	1788.95	15	9	895.484	2	62.2	2244200	1	23081	Banda_3_836.raw	2	2	402	416			PEAKS DB
21	26	A0A1S2XV08|A0A1S2XV08_CICAR	R.Q(-17.03)LEENLLLFDLVESK.L	Y	71.69	1771.92	15	16	886.971	2	62.19	3862100	1	23054	Banda_3_836.raw	1	1	402	416	Pyro-glu from Q	Q1:Pyro-glu from Q:1000.00	PEAKS DB
21	26	A0A1S2XV08|A0A1S2XV08_CICAR	K.NNPNILNNLIYTPLTITPEGEYR.M	Y	65.66	2658.37	23	10	1330.19	2	55.74	5963300	1	20080	Banda_3_836.raw	2	2	246	268			PEAKS DB
21	26	A0A1S2XV08|A0A1S2XV08_CICAR	K.EAQVNAVGPFGLC(+57.02)FDSK.R	Y	55.36	1837.87	17	9	919.942	2	51.86	1351700	1	18021	Banda_3_836.raw	1	1	330	346	Carbamidomethylation	C13:Carbamidomethylation:1000.00	PEAKS DB
21	26	A0A1S2XV08|A0A1S2XV08_CICAR	K.AVNVEFVLDR.S	Y	45.32	1160.62	10	-8	581.316	2	51.07	5202200	1	17873	Banda_3_836.raw	1	1	351	360			PEAKS DB
21	26	A0A1S2XV08|A0A1S2XV08_CICAR	K.SNGAIIFGDAANNM(+15.99)R.F	Y	40.92	1565.73	15	-4	783.87	2	46.58	785920	1	14888	Banda_3_836.raw	1	1	223	237	Oxidation (M)	M14:Oxidation (M):1000.00	PEAKS DB
25	22	A0A1S2XIS4|A0A1S2XIS4_CICAR	R.YRVENLYEGPLDDQYANAIR.N	Y	69.46	2398.16	20	0	800.392	3	52.88	803670	1	18927	Banda_3_836.raw	1	1	349	368			PEAKS DB
25	22	A0A1S2XIS4|A0A1S2XIS4_CICAR	K.DSVVAGFQWASK.E	Y	64.52	1293.64	12	7	647.825	2	49.22	2722600	1	16592	Banda_3_836.raw	1	1	662	673			PEAKS DB
25	22	A0A1S2XIS4|A0A1S2XIS4_CICAR	R.GGGQIIPTAR.R	Y	57.64	968.54	10	9	485.278	2	37.56	13882000	1	11056	Banda_3_836.raw	2	2	702	711			PEAKS DB
25	22	A0A1S2XIS4|A0A1S2XIS4_CICAR	R.PLEDGLAEAIDEGTIGPR.D	Y	57.09	1851.92	18	14	926.969	2	51.67	4678600	1	18181	Banda_3_836.raw	2	2	593	610			PEAKS DB
25	22	A0A1S2XIS4|A0A1S2XIS4_CICAR	R.VENLYEGPLDDQYANAIR.N	Y	53.19	2078.99	18	-11	1040.5	2	49.06	979880	1	16483	Banda_3_836.raw	1	1	351	368			PEAKS DB
25	22	A0A1S2XIS4|A0A1S2XIS4_CICAR	K.AYLPVVESFGFSSQLR.A	Y	50.8	1798.93	16	21	900.472	2	55.2	2014400	1	19822	Banda_3_836.raw	1	1	771	786			PEAKS DB
25	22	A0A1S2XIS4|A0A1S2XIS4_CICAR	R.C(+57.02)FLELQVDGEEAYQTFQR.V	Y	47.84	2232.02	18	7	1117.02	2	58.62	33778	1	21554	Banda_3_836.raw	1	1	163	180	Carbamidomethylation	C1:Carbamidomethylation:1000.00	PEAKS DB
25	22	A0A1S2XIS4|A0A1S2XIS4_CICAR	K.SDPVVSFR.E	Y	44.78	905.461	8	5	453.738	2	45.21	6654500	1	14660	Banda_3_836.raw	1	1	558	565			PEAKS DB
25	22	A0A1S2XIS4|A0A1S2XIS4_CICAR	K.EGALAEENMR.A	Y	44.26	1118.5	10	5	560.259	2	33.64	882940	1	8495	Banda_3_836.raw	1	1	674	683			PEAKS DB
25	22	A0A1S2XIS4|A0A1S2XIS4_CICAR	K.NTGSPSC(+57.02)K.R	Y	41.56	849.365	8	-3	425.69	2	17.29	24591	1	2793	Banda_3_836.raw	1	1	261	268	Carbamidomethylation	C7:Carbamidomethylation:1000.00	PEAKS DB
25	22	A0A1S2XIS4|A0A1S2XIS4_CICAR	R.LWGENFFDPATK.K	Y	40.76	1423.68	12	12	712.847	2	54.79	1723400	1	19632	Banda_3_836.raw	1	1	244	255			PEAKS DB
41	44	A0A1S2XVG1|A0A1S2XVG1_CICAR	R.ISTVNSLTLPILSYLR.L	Y	93.18	1789.03	16	21	895.527	2	58.12	3336700	1	21280	Banda_3_836.raw	1	1	383	398			PEAKS DB
41	44	A0A1S2XVG1|A0A1S2XVG1_CICAR	R.ATPAQVLANAFGLR.Q	Y	90.12	1427.79	14	12	714.902	2	57.23	11603000	1	21067	Banda_3_836.raw	2	2	494	507			PEAKS DB
41	44	A0A1S2XVG1|A0A1S2XVG1_CICAR	R.IISPDLQDEEDEDEDEDEQEQGHSQR.E	Y	41.07	3084.26	26	-22	1029.09	3	46.86	407040	1	15315	Banda_3_836.raw	1	1	267	292			PEAKS DB
41	44	A0A1S2XVG1|A0A1S2XVG1_CICAR	K.AVFDDNVR.K	Y	40.12	934.451	8	-12	468.232	2	40.78	15562000	1	12291	Banda_3_836.raw	1	1	442	449			PEAKS DB
37	33	A0A1S2YKV2|A0A1S2YKV2_CICAR	R.EILEANGLDSSGTEPEITR.R	Y	76.91	2029.98	19	11	1016	2	45.59	429890	1	14697	Banda_3_836.raw	1	1	79	97			PEAKS DB
37	33	A0A1S2YKV2|A0A1S2YKV2_CICAR	K.QEPQPLEAYDLVSDLSVAGK.G	Y	73	2158.08	20	14	1080.05	2	54.1	29590	1	19379	Banda_3_836.raw	1	1	264	283			PEAKS DB
37	33	A0A1S2YKV2|A0A1S2YKV2_CICAR	K.AIVC(+57.02)SDAAAEAAR.Y	Y	62.89	1303.62	13	4	652.817	2	33.2	1785400	1	9068	Banda_3_836.raw	1	1	684	696	Carbamidomethylation	C4:Carbamidomethylation:1000.00	PEAKS DB
37	33	A0A1S2YKV2|A0A1S2YKV2_CICAR	K.DTVIDTAE	Y	40.34	862.392	8	-33	863.396	1	28.9	121350	1	7206	Banda_3_836.raw	1	1	804	811			PEAKS DB
37	33	A0A1S2YKV2|A0A1S2YKV2_CICAR	K.SPPEDTTSLEDK.K	Y	39.53	1317.59	12	-32	659.802	2	27.05	583650	1	6300	Banda_3_836.raw	1	1	725	736			PEAKS DB
30	34	A0A1S2YPX2|A0A1S2YPX2_CICAR	R.TGQYADDAAEDTR.D	Y	75.07	1411.59	13	2	706.8	2	25.63	3958200	1	5805	Banda_3_836.raw	1	1	177	189			PEAKS DB
30	34	A0A1S2YPX2|A0A1S2YPX2_CICAR	K.EASDYASDTTK.K	Y	63.1	1186.5	11	11	594.257	2	22.77	1354400	1	4756	Banda_3_836.raw	2	2	347	357			PEAKS DB
30	34	A0A1S2YPX2|A0A1S2YPX2_CICAR	K.DLAADAAQK.A	Y	47	901.45	9	-12	451.732	2	26.55	2576400	1	6136	Banda_3_836.raw	1	1	212	220			PEAKS DB
30	34	A0A1S2YPX2|A0A1S2YPX2_CICAR	K.DYAGDAAEK.T	Y	44.44	938.398	9	6	470.207	2	17.76	4639700	1	2926	Banda_3_836.raw	2	2	234	242			PEAKS DB
31	32	A0A1S2YZ56|A0A1S2YZ56_CICAR	K.VPEDLVEAITNKK.E	Y	75.64	1454.8	13	0	485.94	3	52.38	5495900	1	18622	Banda_3_836.raw	1	1	240	252			PEAKS DB
31	32	A0A1S2YZ56|A0A1S2YZ56_CICAR	K.QGDVFLVPR.F	Y	49.39	1029.56	9	1	515.788	2	49.68	4545400	1	16827	Banda_3_836.raw	1	1	380	388			PEAKS DB
31	32	A0A1S2YZ56|A0A1S2YZ56_CICAR	R.EGSVFYIHSNLEAQR.K	Y	47.65	1748.85	15	9	583.957	3	52.01	1253900	1	18097	Banda_3_836.raw	1	1	181	195			PEAKS DB
31	32	A0A1S2YZ56|A0A1S2YZ56_CICAR	K.GSVLQILDK.Q	Y	46.89	971.565	9	-4	486.79	2	52.18	6773800	1	18132	Banda_3_836.raw	1	1	423	431			PEAKS DB
31	32	A0A1S2YZ56|A0A1S2YZ56_CICAR	R.VVC(+57.02)GSNNVDEC(+57.02)QNK.R	Y	40.84	1621.68	14	14	811.85	2	22.87	0	1	4741	Banda_3_836.raw	0	0	361	374	Carbamidomethylation	C3:Carbamidomethylation:1000.00;C11:Carbamidomethylation:1000.00	PEAKS DB
49	59	A0A1S2XYX3|A0A1S2XYX3_CICAR	R.NNPDATATPGGVAASVAAAAR.L	Y	86.25	1880.93	21	11	941.475	2	45.17	3852400	1	14339	Banda_3_836.raw	2	2	231	251			PEAKS DB
49	59	A0A1S2XYX3|A0A1S2XYX3_CICAR	R.DVTDVTC(+57.02)DR.G	Y	59.22	1079.46	9	-1	540.735	2	26.64	1677200	1	6346	Banda_3_836.raw	1	1	78	86	Carbamidomethylation	C7:Carbamidomethylation:1000.00	PEAKS DB
49	59	A0A1S2XYX3|A0A1S2XYX3_CICAR	R.GVTVTETQVPGR.R	Y	48.94	1242.66	12	-3	622.335	2	32.39	4780900	1	8311	Banda_3_836.raw	1	1	87	98			PEAKS DB
34	30	sp|O49817|LEA2_CICAR	K.GM(+15.99)AQGATDAVK.Q	Y	56.2	1063.5	11	7	532.756	2	23.51	1180200	1	5010	Banda_3_836.raw	1	1	125	135	Oxidation (M)	M2:Oxidation (M):1000.00	PEAKS DB
34	30	sp|O49817|LEA2_CICAR	K.DNSAGFLQQTGEK.A	Y	55.38	1393.65	13	49	697.834	2	33.09	5831400	1	9439	Banda_3_836.raw	2	2	110	122			PEAKS DB
34	30	sp|O49817|LEA2_CICAR	K.TNQM(+15.99)IGNIEDK.A	Y	50.81	1277.59	11	-29	639.802	2	29.54	5114900	1	7284	Banda_3_836.raw	1	1	21	31	Oxidation (M)	M4:Oxidation (M):1000.00	PEAKS DB
34	30	sp|O49817|LEA2_CICAR	K.AQQAAQTAK.D	Y	50.73	915.477	9	-1	458.746	2	17.2	207130	1	2760	Banda_3_836.raw	1	1	39	47			PEAKS DB
34	30	sp|O49817|LEA2_CICAR	K.TQQTTQATK.E	Y	45.67	1005.51	9	5	503.762	2	17.59	80471	1	2843	Banda_3_836.raw	1	1	72	80			PEAKS DB
34	30	sp|O49817|LEA2_CICAR	K.TSQTAQAAK.E	Y	42.4	904.461	9	-6	453.238	2	17.54	122230	1	2833	Banda_3_836.raw	1	1	50	58			PEAKS DB
38	37	A0A1S2XVJ8|A0A1S2XVJ8_CICAR	R.NIENYGLAVLEVK.G	Y	70.14	1460.79	13	14	731.402	2	53.36	15929000	1	18814	Banda_3_836.raw	1	1	120	132			PEAKS DB
38	37	A0A1S2XVJ8|A0A1S2XVJ8_CICAR	K.EVAYEYPAEK.V	Y	46.01	1197.56	10	7	599.785	2	33.82	8630900	1	9345	Banda_3_836.raw	1	1	435	444			PEAKS DB
38	37	A0A1S2XVJ8|A0A1S2XVJ8_CICAR	K.AIIGLVMEDK.T	Y	44.92	1087.59	10	14	544.805	2	52.43	2759800	1	18289	Banda_3_836.raw	1	1	155	164			PEAKS DB
38	37	A0A1S2XVJ8|A0A1S2XVJ8_CICAR	R.NPESVLTAFSSK.V	Y	43.93	1278.65	12	-9	640.33	2	50.46	38791000	1	17615	Banda_3_836.raw	1	1	223	234			PEAKS DB
38	37	A0A1S2XVJ8|A0A1S2XVJ8_CICAR	R.IDTEDGR.V	Y	41.71	804.361	7	60	403.19	2	17.76	983390	1	2913	Banda_3_836.raw	1	1	98	104			PEAKS DB
38	37	A0A1S2XVJ8|A0A1S2XVJ8_CICAR	R.VPAGTPMYLVNR.D	Y	40.5	1316.69	12	4	659.353	2	47.68	1457700	1	15755	Banda_3_836.raw	1	1	178	189			PEAKS DB
39	36	A0A3Q7K771|A0A3Q7K771_CICAR	K.YVLLDYAPGTTNDK.V	Y	49.88	1568.77	14	7	785.394	2	48.86	20315000	1	16693	Banda_3_836.raw	1	1	27	40			PEAKS DB
39	36	A0A3Q7K771|A0A3Q7K771_CICAR	K.NTLDYWPSLQGIIPMKN	Y	49.35	1989	17	12	995.51	2	55.45	54460	1	20166	Banda_3_836.raw	1	1	214	230			PEAKS DB
39	36	A0A3Q7K771|A0A3Q7K771_CICAR	K.VLYGPSFVR.D	Y	48.99	1036.57	9	9	519.293	2	50.47	29927000	1	17492	Banda_3_836.raw	1	1	41	49			PEAKS DB
39	36	A0A3Q7K771|A0A3Q7K771_CICAR	R.NNEAYLFINDK.Y	Y	44.73	1339.64	11	-2	670.827	2	48.24	13907000	1	15927	Banda_3_836.raw	1	1	16	26			PEAKS DB
39	36	A0A3Q7K771|A0A3Q7K771_CICAR	M.TNFGYINAAFR.S	Y	44.3	1272.63	11	5	637.32	2	51.39	11761000	1	17664	Banda_3_836.raw	1	1	2	12			PEAKS DB
39	36	A0A3Q7K771|A0A3Q7K771_CICAR	K.TNEAYLFK.G	Y	43.41	984.492	8	3	493.253	2	47.55	21342000	1	15788	Banda_3_836.raw	1	1	183	190			PEAKS DB
65	53	A0A1S2YGY5|A0A1S2YGY5_CICAR	M.PGLTIGDTIPDLQVDTTQGK.I	Y	79.56	2068.07	20	12	1035.04	2	50.32	4084600	1	17495	Banda_3_836.raw	1	1	2	21			PEAKS DB
65	53	A0A1S2YGY5|A0A1S2YGY5_CICAR	K.Q(-17.03)LNM(+15.99)VDPDEKDSNGNLPSR.A	Y	55.68	2126.95	19	25	1064.49	2	35.05	0	1	9823	Banda_3_836.raw	0	0	109	127	Pyro-glu from Q; Oxidation (M)	Q1:Pyro-glu from Q:1000.00;M4:Oxidation (M):1000.00	PEAKS DB
65	53	A0A1S2YGY5|A0A1S2YGY5_CICAR	K.LSFLYPATTGR.N	Y	50.36	1224.65	11	-6	613.332	2	51.55	5264500	1	17964	Banda_3_836.raw	1	1	140	150			PEAKS DB
52	68	sp|O65735|ALF_CICAR	K.GILAADESTGTIGK.R	Y	75.01	1331.69	14	20	666.855	2	45.99	203900	1	15012	Banda_3_836.raw	1	1	25	38			PEAKS DB
52	68	sp|O65735|ALF_CICAR	K.GTVELAGTDGETTTQGLDGLGAR.C	Y	55.98	2218.07	23	30	1110.05	2	44.69	393440	1	14373	Banda_3_836.raw	1	1	107	129			PEAKS DB
52	68	sp|O65735|ALF_CICAR	K.ANSEATLGTYK.G	Y	39.09	1153.56	11	-46	577.785	2	29.7	194230	1	7718	Banda_3_836.raw	1	1	329	339			PEAKS DB
50	50	A0A1S2XSP2|A0A1S2XSP2_CICAR	R.YETSAVNPQQR.Y	Y	60.58	1291.62	11	0	646.815	2	26.66	9304800	1	6226	Banda_3_836.raw	1	1	28	38			PEAKS DB
50	50	A0A1S2XSP2|A0A1S2XSP2_CICAR	R.YDTAVNPQQR.Y	Y	57.87	1190.57	10	-11	596.291	2	26.56	8567500	1	6200	Banda_3_836.raw	1	1	18	27			PEAKS DB
50	50	A0A1S2XSP2|A0A1S2XSP2_CICAR	K.EVGQDIQSK.A	Y	50.91	1002.5	9	4	502.257	2	25.39	5035700	1	5907	Banda_3_836.raw	1	1	172	180			PEAKS DB
50	50	A0A1S2XSP2|A0A1S2XSP2_CICAR	R.Q(-17.03)TQGTVPEQLEYAK.R	Y	40.42	1573.76	14	6	787.889	2	34.83	1712500	1	9640	Banda_3_836.raw	1	1	136	149	Pyro-glu from Q	Q1:Pyro-glu from Q:1000.00	PEAKS DB
40	41	A0A1S3E1N3|A0A1S3E1N3_CICAR	R.ITTANSLTLPVLK.S	Y	56	1369.82	13	21	685.918	2	51.21	6749100	1	17857	Banda_3_836.raw	1	1	394	406			PEAKS DB
40	41	A0A1S3E1N3|A0A1S3E1N3_CICAR	R.VQVVNNEGK.S	Y	48.03	985.519	9	-3	493.767	2	17.76	6470900	1	3177	Banda_3_836.raw	2	2	444	452			PEAKS DB
40	41	A0A1S3E1N3|A0A1S3E1N3_CICAR	R.FYLAGNPETEK.Q	Y	44.71	1267.61	11	-17	634.81	2	46.81	10674000	1	15245	Banda_3_836.raw	1	1	190	200			PEAKS DB
51	40	A0A1S2XED8|A0A1S2XED8_CICAR	K.IVVVDSELPNEAGLDK.R	Y	60.15	1696.89	16	16	849.453	2	47.27	2219600	1	15679	Banda_3_836.raw	1	1	334	349			PEAKS DB
51	40	A0A1S2XED8|A0A1S2XED8_CICAR	R.SIDGGAAFGFPETPEDATR.A	Y	55.64	1936.88	19	5	969.448	2	49	2280300	1	16326	Banda_3_836.raw	1	1	468	486			PEAKS DB
51	40	A0A1S2XED8|A0A1S2XED8_CICAR	R.SIQDAYINAIR.R	Y	45.07	1262.66	11	4	632.338	2	48.25	4067900	1	16234	Banda_3_836.raw	1	1	500	510			PEAKS DB
51	40	A0A1S2XED8|A0A1S2XED8_CICAR	K.Q(-17.03)NFEETIGFGDGVTK.L	Y	40.19	1623.74	15	-8	812.877	2	45.8	541870	1	14717	Banda_3_836.raw	1	1	34	48	Pyro-glu from Q	Q1:Pyro-glu from Q:1000.00	PEAKS DB
66	52	A0A1S2YP40|A0A1S2YP40_CICAR	K.NSIEEITEPQLER.V	Y	74.54	1556.77	13	19	779.393	2	45.53	32700	1	14521	Banda_3_836.raw	1	1	141	153			PEAKS DB
66	52	A0A1S2YP40|A0A1S2YP40_CICAR	K.EGSSIINSSSVNAYIGK.A	Y	52.78	1724.86	17	18	863.438	2	45.82	212800	1	14973	Banda_3_836.raw	1	1	175	191			PEAKS DB
66	52	A0A1S2YP40|A0A1S2YP40_CICAR	R.IDVLVNNAAEQHLK.N	Y	51.09	1562.84	14	-5	521.954	3	50.85	3976200	1	17845	Banda_3_836.raw	1	1	127	140			PEAKS DB
57	54	A0A1S2YP37|A0A1S2YP37_CICAR	R.TTPSYVAFTDTER.L	Y	69.09	1486.69	13	20	744.356	2	45.58	3122100	1	14673	Banda_3_836.raw	1	1	39	51			PEAKS DB
57	54	A0A1S2YP37|A0A1S2YP37_CICAR	R.IINEPTAAAIAYGLDKK.A	Y	50.9	1786.98	17	12	596.669	3	52.38	2630500	1	18340	Banda_3_836.raw	1	1	175	191			PEAKS DB
57	54	A0A1S2YP37|A0A1S2YP37_CICAR	K.DAGAISGLNVLR.I	Y	40.55	1184.65	12	-4	593.333	2	48.87	1321900	1	16250	Banda_3_836.raw	1	1	163	174			PEAKS DB
46	49	A0A1S2YNP0|A0A1S2YNP0_CICAR	K.AVQQVNSTTVSSR.R	Y	52.92	1375.71	13	2	688.86	2	25.28	1038900	1	5833	Banda_3_836.raw	1	1	498	510			PEAKS DB
46	49	A0A1S2YNP0|A0A1S2YNP0_CICAR	K.SVFGEDALVNVSIEK.Q	Y	48.18	1605.83	15	5	803.92	2	51.84	664520	1	18220	Banda_3_836.raw	1	1	901	915			PEAKS DB
46	49	A0A1S2YNP0|A0A1S2YNP0_CICAR	K.VSSTETGVIFGNIVYETSSNVLER.T	Y	39.46	2600.3	24	25	1301.16	2	55.41	218570	1	20050	Banda_3_836.raw	1	1	793	816			PEAKS DB
54	61	A0A1S3DYQ2|A0A1S3DYQ2_CICAR	K.YGDVFNVSGDLSSTPIAPR.D	Y	59.37	1993.97	19	11	997.996	2	50.97	722160	1	17519	Banda_3_836.raw	1	1	16	34			PEAKS DB
54	61	A0A1S3DYQ2|A0A1S3DYQ2_CICAR	R.VITETLGGQVLGK.F	Y	50.73	1313.76	13	5	657.885	2	47.46	2897400	1	15795	Banda_3_836.raw	1	1	98	110			PEAKS DB
54	61	A0A1S3DYQ2|A0A1S3DYQ2_CICAR	R.DAATMQSAEDQTLGQTR.K	Y	45.11	1821.82	17	14	911.917	2	32.15	0	1	8527	Banda_3_836.raw	0	0	35	51			PEAKS DB
58	118	A0A1S2Y8R4|A0A1S2Y8R4_CICAR	R.TTGSYTYGGSYDPNINQPSR.Q	Y	62.84	2176.97	20	8	1089.49	2	35.95	16478000	1	10115	Banda_3_836.raw	2	2	7	26			PEAKS DB
58	118	A0A1S2Y8R4|A0A1S2Y8R4_CICAR	K.EYGNYAQGR.V	Y	46.78	1056.46	9	0	529.239	2	20.88	554910	1	4022	Banda_3_836.raw	1	1	136	144			PEAKS DB
68	72	A0A1S2XHQ9|A0A1S2XHQ9_CICAR	K.IGGIGTVPVGR.V	Y	53.59	1024.6	11	2	513.309	2	45.43	611800	1	14395	Banda_3_836.raw	1	1	244	254			PEAKS DB
68	72	A0A1S2XHQ9|A0A1S2XHQ9_CICAR	R.VETGVIKPGVIVTFGPTGLTTEVK.S	Y	52.95	2441.38	24	14	814.801	3	54.1	4356400	1	19217	Banda_3_836.raw	1	1	255	278			PEAKS DB
68	72	A0A1S2XHQ9|A0A1S2XHQ9_CICAR	R.Q(-17.03)TVAVGVIK.S	Y	41.35	896.533	9	6	897.541	1	36.24	925280	1	10245	Banda_3_836.raw	1	1	419	427	Pyro-glu from Q	Q1:Pyro-glu from Q:1000.00	PEAKS DB
63	93	E5DCK1|E5DCK1_CICAR	K.DAYVGDEAQSK.R	Y	55.5	1181.52	11	-3	591.767	2	24.94	939550	1	5577	Banda_3_836.raw	1	1	53	63			PEAKS DB
63	93	E5DCK1|E5DCK1_CICAR	R.VAPEEHPVLLTEAPLNPK.A	Y	44.45	1953.06	18	4	652.027	3	51.95	3058600	1	18008	Banda_3_836.raw	1	1	98	115			PEAKS DB
63	92	A0A1S3E926|A0A1S3E926_CICAR	K.DAYVGDEAQSK.R	Y	55.5	1181.52	11	-3	591.767	2	24.94	939550	1	5577	Banda_3_836.raw	1	1	53	63			PEAKS DB
63	92	A0A1S3E926|A0A1S3E926_CICAR	R.VAPEEHPVLLTEAPLNPK.A	Y	44.45	1953.06	18	4	652.027	3	51.95	3058600	1	18008	Banda_3_836.raw	1	1	98	115			PEAKS DB
70	76	A0A1S2YBD0|A0A1S2YBD0_CICAR	R.VPTVDVSVVDLTVR.L	Y	54.81	1497.84	14	3	749.928	2	51.74	1149800	1	17896	Banda_3_836.raw	1	1	240	253			PEAKS DB
70	76	A0A1S2YBD0|A0A1S2YBD0_CICAR	K.GILGYTEDDVVSTDFVGDSR.S	Y	39.63	2143.99	20	-11	1073	2	52.38	406320	1	18386	Banda_3_836.raw	1	1	277	296			PEAKS DB
70	76	A0A1S2YBD0|A0A1S2YBD0_CICAR	R.NPEEIPWGEVGADYVVESTGVFTDKDK.A	Y	39.57	2980.4	27	5	994.474	3	55.17	586390	1	20019	Banda_3_836.raw	1	1	86	112			PEAKS DB
59	169	A0A1S2XDF0|A0A1S2XDF0_CICAR	K.IGDNLSDK.C	Y	56.52	860.424	8	-58	431.217	2	28.61	70425000	1	7194	Banda_3_836.raw	2	2	106	113			PEAKS DB
59	169	A0A1S2XDF0|A0A1S2XDF0_CICAR	K.EMEEMER.E	Y	39.14	952.363	7	-40	477.187	2	29.17	3776500	1	7399	Banda_3_836.raw	1	1	118	124			PEAKS DB

## Sheet: 4
Protein Group	Protein ID	Protein Accession	Peptide	Unique	Score	Mass	Length	ppm	m/z	z	RT	Area Sample	Fraction	Scan	Source File	#Feature	#Feature Sample 1	Start	End	PTM	AScore	Found By
1	1	A0A1S2XET4|A0A1S2XET4_CICAR	K.KPTNETLTNTTQTAQGK.E	Y	112.36	1831.93	17	15	916.972	2	42.86	152180000	1	13636	Banda_5_821.raw	2	2	244	260			PEAKS DB
1	1	A0A1S2XET4|A0A1S2XET4_CICAR	K.ATAAGWTAAHYSTQLTVDGTK.A	Y	108.12	2149.04	21	2	1075.53	2	50.18	126320000	1	17131	Banda_5_821.raw	2	2	362	382			PEAKS DB
1	1	A0A1S2XET4|A0A1S2XET4_CICAR	R.NQAQENAM(+15.99)EAISGAQER.Y	Y	95.93	1861.82	17	3	931.919	2	31.49	146530000	1	8435	Banda_5_821.raw	4	4	222	238	Oxidation (M)	M8:Oxidation (M):1000.00	PEAKS DB
1	1	A0A1S2XET4|A0A1S2XET4_CICAR	R.NQAQENAMEAISGAQER.Y	Y	89.57	1845.83	17	17	923.923	2	40.85	18914000	1	12344	Banda_5_821.raw	2	2	222	238			PEAKS DB
1	1	A0A1S2XET4|A0A1S2XET4_CICAR	K.KPIENM(+15.99)TSSGNQVDQGGGSNVVSGIGETVGK.L	Y	86.48	3061.46	31	12	1021.5	3	47.77	26004000	1	15845	Banda_5_821.raw	1	1	509	539	Oxidation (M)	M6:Oxidation (M):1000.00	PEAKS DB
1	1	A0A1S2XET4|A0A1S2XET4_CICAR	R.IQAQGPGNQVDQGR.G	Y	85.66	1466.72	14	20	734.37	2	27.19	154220000	1	6504	Banda_5_821.raw	3	3	475	488			PEAKS DB
1	1	A0A1S2XET4|A0A1S2XET4_CICAR	K.KPIENVISSGEEK.N	Y	85.3	1428.75	13	5	715.381	2	48.93	46143000	1	16468	Banda_5_821.raw	2	2	546	558			PEAKS DB
1	1	A0A1S2XET4|A0A1S2XET4_CICAR	K.TAAEYVSPVAEK.T	Y	83.38	1263.63	12	6	632.825	2	34.69	143630000	1	9752	Banda_5_821.raw	2	2	339	350			PEAKS DB
1	1	A0A1S2XET4|A0A1S2XET4_CICAR	K.SQQGYEATKDTVSSAAK.T	Y	82.86	1769.84	17	12	885.93	2	42.75	84726000	1	13578	Banda_5_821.raw	3	3	289	305			PEAKS DB
1	1	A0A1S2XET4|A0A1S2XET4_CICAR	R.GSNVVSSIGETVGK.L	Y	79.56	1332.69	14	13	667.352	2	42.88	112560000	1	13365	Banda_5_821.raw	1	1	489	502			PEAKS DB
1	1	A0A1S2XET4|A0A1S2XET4_CICAR	K.AAANVVEGAAR.Y	Y	76.8	1027.54	11	7	514.778	2	29.62	593680000	1	7610	Banda_5_821.raw	5	5	383	393			PEAKS DB
1	1	A0A1S2XET4|A0A1S2XET4_CICAR	K.RASQPLQEGEYIPTSEGIGENVSNYTQK.M	Y	74.96	3094.48	28	8	1032.5	3	49.57	9683900	1	16844	Banda_5_821.raw	1	1	440	467			PEAKS DB
1	1	A0A1S2XET4|A0A1S2XET4_CICAR	Q.AQGPGNQVDQGR.G	Y	73.25	1225.58	12	-4	613.797	2	24.46	5768900	1	5557	Banda_5_821.raw	2	2	477	488			PEAKS DB
1	1	A0A1S2XET4|A0A1S2XET4_CICAR	K.TELGTGQVVAEK.A	Y	72.74	1230.65	12	17	616.331	2	33.32	271530000	1	9320	Banda_5_821.raw	1	1	153	164			PEAKS DB
1	1	A0A1S2XET4|A0A1S2XET4_CICAR	R.LGYGAENER.A	Y	70.11	1007.47	9	11	504.741	2	31.39	229750000	1	8474	Banda_5_821.raw	2	2	177	185			PEAKS DB
1	1	A0A1S2XET4|A0A1S2XET4_CICAR	K.DKATAAGWTAAHYSTQLTVDGTK.A	Y	70.08	2392.17	23	5	599.049	4	50.94	10021000	1	17243	Banda_5_821.raw	2	2	360	382			PEAKS DB
1	1	A0A1S2XET4|A0A1S2XET4_CICAR	R.DVGNFEVESK.G	Y	69.83	1122.52	10	11	562.268	2	35.82	266970000	1	10271	Banda_5_821.raw	2	2	111	120			PEAKS DB
1	1	A0A1S2XET4|A0A1S2XET4_CICAR	K.ETVSDIGNNM(+15.99)IK.S	Y	69.82	1335.63	12	7	668.825	2	32.32	75171000	1	8898	Banda_5_821.raw	1	1	578	589	Oxidation (M)	M10:Oxidation (M):1000.00	PEAKS DB
1	1	A0A1S2XET4|A0A1S2XET4_CICAR	K.SQQGYEATK.D	Y	69.63	1010.47	9	-2	506.241	2	24.2	59006000	1	5321	Banda_5_821.raw	1	1	289	297			PEAKS DB
1	1	A0A1S2XET4|A0A1S2XET4_CICAR	K.GLAASAGESAK.E	Y	67.52	960.487	11	31	481.252	2	28.26	297770000	1	7169	Banda_5_821.raw	3	3	412	422			PEAKS DB
1	1	A0A1S2XET4|A0A1S2XET4_CICAR	R.E(-18.01)THELGSNFDSLSDR.N	Y	64.89	1687.74	15	11	844.88	2	46.66	1776700	1	15043	Banda_5_821.raw	1	1	76	90	Pyro-glu from E	E1:Pyro-glu from E:1000.00	PEAKS DB
1	1	A0A1S2XET4|A0A1S2XET4_CICAR	K.VIVVGEGDVEEK.Q	Y	62.26	1271.66	12	7	636.838	2	39.04	36650000	1	11630	Banda_5_821.raw	4	4	625	636			PEAKS DB
1	1	A0A1S2XET4|A0A1S2XET4_CICAR	K.GEQNFGTGR.L	Y	60.14	964.436	9	-5	483.225	2	28.47	18430000	1	7170	Banda_5_821.raw	3	3	168	176			PEAKS DB
1	1	A0A1S2XET4|A0A1S2XET4_CICAR	R.ASQPLQEGEYIPTSEGIGENVSNYTQK.M	Y	59.75	2938.38	27	18	980.47	3	44.71	23514000	1	14100	Banda_5_821.raw	1	1	441	467			PEAKS DB
1	1	A0A1S2XET4|A0A1S2XET4_CICAR	R.ETHELGSNFDSLSDR.N	Y	59.52	1705.75	15	2	569.592	3	50.3	24546000	1	17191	Banda_5_821.raw	2	2	76	90			PEAKS DB
1	1	A0A1S2XET4|A0A1S2XET4_CICAR	K.AIGDIGGTGK.T	Y	58.91	887.471	10	10	888.479	1	32.81	207180000	1	9099	Banda_5_821.raw	2	2	64	73			PEAKS DB
1	1	A0A1S2XET4|A0A1S2XET4_CICAR	K.DTVSSVAK.T	Y	58.81	805.418	8	11	806.426	1	25.53	17440000	1	6013	Banda_5_821.raw	4	4	331	338			PEAKS DB
1	1	A0A1S2XET4|A0A1S2XET4_CICAR	K.NLESTEQGK.G	Y	57.89	1004.48	9	9	503.246	2	26.62	8125000	1	6391	Banda_5_821.raw	3	3	559	567			PEAKS DB
1	1	A0A1S2XET4|A0A1S2XET4_CICAR	K.VVTGTPQHNKPTK.T	Y	57.84	1405.77	13	4	469.597	3	50.18	39836000	1	17002	Banda_5_821.raw	1	1	140	152			PEAKS DB
1	1	A0A1S2XET4|A0A1S2XET4_CICAR	Y.STQLTVDGTK.A	Y	56.9	1048.54	10	-6	525.277	2	29.43	14284000	1	7545	Banda_5_821.raw	1	1	373	382			PEAKS DB
1	1	A0A1S2XET4|A0A1S2XET4_CICAR	K.DTVSC(+57.02)AAK.T	Y	56.71	850.385	8	-1	426.2	2	17.83	4015800	1	3071	Banda_5_821.raw	3	3	265	272	Carbamidomethylation	C5:Carbamidomethylation:1000.00	PEAKS DB
1	1	A0A1S2XET4|A0A1S2XET4_CICAR	K.DTVSSAAK.T	Y	56.55	777.387	8	10	778.395	1	17.83	1488300	1	3082	Banda_5_821.raw	1	1	298	305			PEAKS DB
1	1	A0A1S2XET4|A0A1S2XET4_CICAR	K.ETVSDIGNNMIK.S	Y	55.23	1319.64	12	15	660.828	2	42.66	679900	1	13420	Banda_5_821.raw	1	1	578	589			PEAKS DB
1	1	A0A1S2XET4|A0A1S2XET4_CICAR	H.YSTQLTVDGTK.A	Y	54.16	1211.6	11	4	606.809	2	34.38	2924200	1	9583	Banda_5_821.raw	1	1	372	382			PEAKS DB
1	1	A0A1S2XET4|A0A1S2XET4_CICAR	K.TVVVDLKDK.A	Y	53.72	1015.59	9	-5	508.803	2	49.31	857500	1	16332	Banda_5_821.raw	1	1	353	361			PEAKS DB
1	1	A0A1S2XET4|A0A1S2XET4_CICAR	R.LTLEEISK.Y	Y	53.03	931.523	8	-4	466.768	2	46.51	164590000	1	15063	Banda_5_821.raw	2	2	212	219			PEAKS DB
1	1	A0A1S2XET4|A0A1S2XET4_CICAR	R.EITTTTER.E	Y	53.01	949.472	8	10	950.48	1	26.86	404030000	1	6694	Banda_5_821.raw	3	3	10	17			PEAKS DB
1	1	A0A1S2XET4|A0A1S2XET4_CICAR	N.QVDQGGGSNVVSGIGETVGK.L	Y	53.01	1886.93	20	1	944.474	2	37.57	906170	1	10964	Banda_5_821.raw	1	1	520	539			PEAKS DB
1	1	A0A1S2XET4|A0A1S2XET4_CICAR	R.YEEAKKPTNETLTNTTQTAQGK.E	Y	52.8	2452.21	22	6	818.41	3	49.55	3598200	1	16554	Banda_5_821.raw	1	1	239	260			PEAKS DB
1	1	A0A1S2XET4|A0A1S2XET4_CICAR	K.VKKPIENVISSGEEK.N	Y	52.45	1655.91	15	15	552.978	3	50.91	5358800	1	17528	Banda_5_821.raw	1	1	544	558			PEAKS DB
1	1	A0A1S2XET4|A0A1S2XET4_CICAR	K.HEAYQSPK.S	Y	51.85	958.451	8	-5	480.233	2	46.59	35846000	1	15217	Banda_5_821.raw	1	1	658	665			PEAKS DB
1	1	A0A1S2XET4|A0A1S2XET4_CICAR	A.Q(-17.03)GPGNQVDQGR.G	Y	51.67	1137.52	11	9	569.766	2	20.44	339780	1	3952	Banda_5_821.raw	1	1	478	488	Pyro-glu from Q	Q1:Pyro-glu from Q:1000.00	PEAKS DB
1	1	A0A1S2XET4|A0A1S2XET4_CICAR	K.ATKGEQNFGTGR.L	Y	51.14	1264.62	12	-3	633.315	2	46.76	6148300	1	15052	Banda_5_821.raw	2	2	165	176			PEAKS DB
1	1	A0A1S2XET4|A0A1S2XET4_CICAR	R.REITTTTER.E	Y	50.5	1105.57	9	10	553.794	2	48.18	12353000	1	15732	Banda_5_821.raw	1	1	9	17			PEAKS DB
1	1	A0A1S2XET4|A0A1S2XET4_CICAR	K.EATKDTVSC(+57.02)AAK.T	Y	49.44	1279.61	12	-10	427.543	3	32.16	17241000	1	9131	Banda_5_821.raw	2	2	261	272	Carbamidomethylation	C9:Carbamidomethylation:1000.00	PEAKS DB
1	1	A0A1S2XET4|A0A1S2XET4_CICAR	K.GQQGYVATK.D	Y	49.34	950.482	9	-5	476.248	2	24.98	0	1	5626	Banda_5_821.raw	0	0	322	330			PEAKS DB
1	1	A0A1S2XET4|A0A1S2XET4_CICAR	K.RASQPLQEGEYIPT.S	Y	48.89	1587.79	14	2	794.902	2	42.08	9478700	1	13426	Banda_5_821.raw	2	2	440	453			PEAKS DB
1	1	A0A1S2XET4|A0A1S2XET4_CICAR	D.QGGGSNVVSGIGETVGK.L	Y	47.99	1544.78	17	20	773.399	2	35.74	20634	1	10237	Banda_5_821.raw	1	1	523	539			PEAKS DB
1	1	A0A1S2XET4|A0A1S2XET4_CICAR	K.RASQPLQEGE.Y	Y	46.58	1113.54	10	6	557.778	2	28.61	5929900	1	7268	Banda_5_821.raw	1	1	440	449			PEAKS DB
1	1	A0A1S2XET4|A0A1S2XET4_CICAR	K.GGSDVLGAVK.E	Y	46.47	901.487	10	-2	451.751	2	37.94	107060000	1	11374	Banda_5_821.raw	2	2	568	577			PEAKS DB
1	1	A0A1S2XET4|A0A1S2XET4_CICAR	A.KTAAEYVSPVAEK.T	Y	45.12	1391.73	13	-3	464.917	3	48.71	0	1	16170	Banda_5_821.raw	0	0	338	350			PEAKS DB
1	1	A0A1S2XET4|A0A1S2XET4_CICAR	R.IQAQGPGNQVDQGRG.S	Y	42.94	1523.74	15	10	762.88	2	28.23	0	1	7039	Banda_5_821.raw	0	0	475	489			PEAKS DB
1	1	A0A1S2XET4|A0A1S2XET4_CICAR	K.TVVVDLK.D	Y	41.63	772.469	7	17	773.478	1	42.94	18977000	1	13498	Banda_5_821.raw	1	1	353	359			PEAKS DB
1	1	A0A1S2XET4|A0A1S2XET4_CICAR	K.AAELAAK.S	Y	41.44	672.381	7	6	673.388	1	17.83	13561000	1	3105	Banda_5_821.raw	2	2	399	405			PEAKS DB
1	1	A0A1S2XET4|A0A1S2XET4_CICAR	Q.GPGNQVDQGR.G	Y	41.27	1026.48	10	-19	514.248	2	24.37	228700	1	5271	Banda_5_821.raw	1	1	479	488			PEAKS DB
1	1	A0A1S2XET4|A0A1S2XET4_CICAR	K.SGDNKVVER.G	Y	39.75	1002.51	9	5	502.262	2	44.52	0	1	14163	Banda_5_821.raw	0	0	590	598			PEAKS DB
1	1	A0A1S2XET4|A0A1S2XET4_CICAR	R.GSNVVSSIGETVGKL.G	Y	38.13	1445.77	15	10	723.894	2	51.25	1378500	1	17680	Banda_5_821.raw	1	1	489	503			PEAKS DB
1	1	A0A1S2XET4|A0A1S2XET4_CICAR	M.A(+42.01)SEQLSR.R	Y	36.86	831.409	7	16	832.417	1	22.74	41966000	1	4902	Banda_5_821.raw	1	1	2	8	Acetylation (Protein N-term)	A1:Acetylation (Protein N-term):1000.00	PEAKS DB
1	1	A0A1S2XET4|A0A1S2XET4_CICAR	L.AASAGESAK.E	Y	36.72	790.382	9	-4	791.389	1	28.27	861170	1	7176	Banda_5_821.raw	1	1	414	422			PEAKS DB
1	1	A0A1S2XET4|A0A1S2XET4_CICAR	I.GDIGGTGK.T	Y	36.71	703.35	8	12	704.358	1	33.15	2769300	1	8973	Banda_5_821.raw	1	1	66	73			PEAKS DB
1	1	A0A1S2XET4|A0A1S2XET4_CICAR	S.Q(-17.03)QGYEATK.D	Y	36.66	906.408	8	12	907.417	1	19.75	50932	1	3695	Banda_5_821.raw	1	1	290	297	Pyro-glu from Q	Q1:Pyro-glu from Q:1000.00	PEAKS DB
1	1	A0A1S2XET4|A0A1S2XET4_CICAR	K.NLESTEQGKGGSDVLGAVK.E	Y	36.22	1887.95	19	2	630.325	3	49.47	4668800	1	16391	Banda_5_821.raw	1	1	559	577			PEAKS DB
1	1	A0A1S2XET4|A0A1S2XET4_CICAR	L.TNTTQTAQGK.E	Y	35.99	1048.51	10	1	525.265	2	17.81	310450	1	3067	Banda_5_821.raw	1	1	251	260			PEAKS DB
1	1	A0A1S2XET4|A0A1S2XET4_CICAR	K.KPIENM(+15.99)TSSGNQVD.Q	Y	35.08	1534.69	14	5	768.354	2	26.45	1169200	1	6262	Banda_5_821.raw	1	1	509	522	Oxidation (M)	M6:Oxidation (M):1000.00	PEAKS DB
1	1	A0A1S2XET4|A0A1S2XET4_CICAR	K.D(sub S)QQGYEATK.D	Y	34.46	1038.46	9	-4	520.238	2	18.43	388950	1	3305	Banda_5_821.raw	1	1	289	297			SPIDER
2	2	A0A1S2YP37|A0A1S2YP37_CICAR	K.ATAGDTHLGGEDFDNR.M	N	92.01	1674.72	16	14	838.37	2	48.21	131380000	1	16148	Banda_5_821.raw	2	2	226	241			PEAKS DB
2	2	A0A1S2YP37|A0A1S2YP37_CICAR	K.NAVVTVPAYFNDSQR.Q	N	91.58	1679.83	15	1	840.921	2	48.09	104240000	1	15926	Banda_5_821.raw	4	4	144	158			PEAKS DB
2	2	A0A1S2YP37|A0A1S2YP37_CICAR	K.NQVAMNPQNTVFDAK.R	Y	89.18	1675.8	15	9	838.908	2	42.79	13822000	1	13610	Banda_5_821.raw	1	1	59	73			PEAKS DB
2	2	A0A1S2YP37|A0A1S2YP37_CICAR	K.SINPDEAVAYGAAVQAAILSGEGDEK.V	Y	86.93	2574.24	26	27	859.091	3	53.9	32121000	1	18995	Banda_5_821.raw	3	3	367	392			PEAKS DB
2	2	A0A1S2YP37|A0A1S2YP37_CICAR	K.NQVAM(+15.99)NPQNTVFDAK.R	Y	80.37	1691.79	15	8	846.905	2	36.3	97115000	1	10621	Banda_5_821.raw	2	2	59	73	Oxidation (M)	M5:Oxidation (M):1000.00	PEAKS DB
2	2	A0A1S2YP37|A0A1S2YP37_CICAR	R.IINEPTAAAIAYGLDK.K	N	79.96	1658.89	16	12	830.452	2	50.57	86804000	1	17255	Banda_5_821.raw	2	2	175	190			PEAKS DB
2	2	A0A1S2YP37|A0A1S2YP37_CICAR	K.FSAEEISSM(+15.99)VLIK.M	Y	77	1468.75	13	6	735.382	2	50.48	13023000	1	16981	Banda_5_821.raw	1	1	117	129	Oxidation (M)	M9:Oxidation (M):1000.00	PEAKS DB
2	2	A0A1S2YP37|A0A1S2YP37_CICAR	R.TTPSYVAFTDTER.L	N	76.91	1486.69	13	14	744.355	2	45.44	135270000	1	14549	Banda_5_821.raw	1	1	39	51			PEAKS DB
2	2	A0A1S2YP37|A0A1S2YP37_CICAR	Y.GAAVQAAILSGEGDEK.V	Y	76.87	1514.76	16	6	758.386	2	42.83	4753100	1	13630	Banda_5_821.raw	1	1	377	392			PEAKS DB
2	2	A0A1S2YP37|A0A1S2YP37_CICAR	K.AVEDAIVWLEGNQLGEVEEFEDK.Q	Y	75.82	2618.24	23	13	873.755	3	55.09	1842400	1	19268	Banda_5_821.raw	1	1	578	600			PEAKS DB
2	2	A0A1S2YP37|A0A1S2YP37_CICAR	K.FSAEEISSMVLIK.M	Y	73.1	1452.75	13	11	727.385	2	53.32	6700800	1	18325	Banda_5_821.raw	1	1	117	129			PEAKS DB
2	2	A0A1S2YP37|A0A1S2YP37_CICAR	L.SLGLETAGGVM(+15.99)TVLIPR.N	N	71.75	1728.94	17	17	865.481	2	51.78	654400	1	17540	Banda_5_821.raw	2	2	405	421	Oxidation (M)	M11:Oxidation (M):1000.00	PEAKS DB
2	2	A0A1S2YP37|A0A1S2YP37_CICAR	R.EVAEAFLGHSVK.N	Y	69.31	1285.67	12	13	643.841	2	51.13	4358000	1	17398	Banda_5_821.raw	2	2	132	143			PEAKS DB
2	2	A0A1S2YP37|A0A1S2YP37_CICAR	K.SNVHEVVLVGGSTR.I	Y	68.99	1452.77	14	4	485.264	3	49.83	71018000	1	16991	Banda_5_821.raw	2	2	334	347			PEAKS DB
2	2	A0A1S2YP37|A0A1S2YP37_CICAR	R.IINEPTAAAIAYGLDKK.A	N	68.76	1786.98	17	17	596.669	3	51.63	105790000	1	17444	Banda_5_821.raw	2	2	175	191			PEAKS DB
2	2	A0A1S2YP37|A0A1S2YP37_CICAR	K.DAGAISGLNVLR.I	Y	66.83	1184.65	12	6	593.333	2	49.37	116980000	1	16390	Banda_5_821.raw	2	2	163	174			PEAKS DB
2	2	A0A1S2YP37|A0A1S2YP37_CICAR	R.FSDESVQNDMK.L	Y	65.42	1298.54	11	0	650.28	2	34.14	10569000	1	9760	Banda_5_821.raw	1	1	80	90			PEAKS DB
2	2	A0A1S2YP37|A0A1S2YP37_CICAR	R.VEIIPNDQGNR.T	Y	62.54	1253.64	11	4	627.826	2	37.66	102810000	1	11190	Banda_5_821.raw	1	1	28	38			PEAKS DB
2	2	A0A1S2YP37|A0A1S2YP37_CICAR	K.VIPGPADKPMIVVNYK.G	N	62.46	1739.96	16	7	580.996	3	51.19	20572000	1	17326	Banda_5_821.raw	1	1	96	111			PEAKS DB
2	2	A0A1S2YP37|A0A1S2YP37_CICAR	R.FSDESVQNDM(+15.99)K.L	Y	61.79	1314.54	11	13	658.278	2	27.57	54198000	1	6847	Banda_5_821.raw	2	2	80	90	Oxidation (M)	M10:Oxidation (M):1000.00	PEAKS DB
2	2	A0A1S2YP37|A0A1S2YP37_CICAR	K.KFSAEEISSM(+15.99)VLIK.M	Y	61.72	1596.84	14	-2	533.288	3	51.82	12284000	1	17925	Banda_5_821.raw	1	1	116	129	Oxidation (M)	M10:Oxidation (M):1000.00	PEAKS DB
2	2	A0A1S2YP37|A0A1S2YP37_CICAR	L.SLGLETAGGVMTVLIPR.N	N	60.4	1712.95	17	18	857.484	2	54.85	1858800	1	19198	Banda_5_821.raw	1	1	405	421			PEAKS DB
2	2	A0A1S2YP37|A0A1S2YP37_CICAR	K.ELEGIC(+57.02)NPIIAK.M	N	60.18	1355.71	12	9	678.864	2	48.76	14589000	1	16331	Banda_5_821.raw	1	1	603	614	Carbamidomethylation	C6:Carbamidomethylation:1000.00	PEAKS DB
2	2	A0A1S2YP37|A0A1S2YP37_CICAR	R.FEELNM(+15.99)DLFR.K	N	60	1328.61	10	16	665.312	2	51.16	11757000	1	17653	Banda_5_821.raw	1	1	307	316	Oxidation (M)	M6:Oxidation (M):1000.00	PEAKS DB
2	2	A0A1S2YP37|A0A1S2YP37_CICAR	R.FEELNMDLFR.K	N	59.72	1312.61	10	13	657.314	2	53.35	2941900	1	18326	Banda_5_821.raw	1	1	307	316			PEAKS DB
2	2	A0A1S2YP37|A0A1S2YP37_CICAR	K.VIPGPADKPMIVVNYKGEEK.K	Y	57.02	2183.17	20	-8	546.798	4	51.6	5085700	1	17506	Banda_5_821.raw	2	2	96	115			PEAKS DB
2	2	A0A1S2YP37|A0A1S2YP37_CICAR	K.M(+15.99)YQGGAGDVPM(+15.99)GGDM(+15.99)PGAGSAGSGSGAGPK.I	Y	56.81	2671.09	30	14	891.373	3	27.95	9958100	1	7074	Banda_5_821.raw	1	1	615	644	Oxidation (M)	M1:Oxidation (M):1000.00;M11:Oxidation (M):1000.00;M15:Oxidation (M):1000.00	PEAKS DB
2	2	A0A1S2YP37|A0A1S2YP37_CICAR	S.LLTIEEGIFEVK.A	N	55.5	1389.78	12	15	695.896	2	53.73	1197300	1	18801	Banda_5_821.raw	1	1	214	225			PEAKS DB
2	2	A0A1S2YP37|A0A1S2YP37_CICAR	L.GLETAGGVMTVLIPR.N	N	55.4	1512.83	15	6	757.424	2	53.42	460420	1	18588	Banda_5_821.raw	1	1	407	421			PEAKS DB
2	2	A0A1S2YP37|A0A1S2YP37_CICAR	K.NSLENYAYNM(+15.99)R.N	N	54.5	1389.6	11	8	695.807	2	39.05	29612000	1	11682	Banda_5_821.raw	1	1	545	555	Oxidation (M)	M10:Oxidation (M):1000.00	PEAKS DB
2	2	A0A1S2YP37|A0A1S2YP37_CICAR	N.AVVTVPAYFNDSQR.Q	N	52.99	1565.78	14	14	783.9	2	48.55	3974200	1	16169	Banda_5_821.raw	1	1	145	158			PEAKS DB
2	2	A0A1S2YP37|A0A1S2YP37_CICAR	K.KFSAEEISSMVLIK.M	Y	50.77	1580.85	14	1	527.957	3	53.44	420020	1	18616	Banda_5_821.raw	1	1	116	129			PEAKS DB
2	2	A0A1S2YP37|A0A1S2YP37_CICAR	K.DISGNAR.A	Y	48.39	731.356	7	17	732.365	1	24.55	2886600	1	5307	Banda_5_821.raw	2	2	257	263			PEAKS DB
2	2	A0A1S2YP37|A0A1S2YP37_CICAR	Y.SDNQPGVLIQVFEGER.A	N	47.76	1786.88	16	18	894.451	2	52.76	8511200	1	18083	Banda_5_821.raw	1	1	437	452			PEAKS DB
2	2	A0A1S2YP37|A0A1S2YP37_CICAR	R.IINEPTAAAIAY.G	N	46.99	1245.66	12	9	623.838	2	39.94	9301500	1	12047	Banda_5_821.raw	1	1	175	186			PEAKS DB
2	2	A0A1S2YP37|A0A1S2YP37_CICAR	R.LIGDAAK.N	N	45.52	686.396	7	2	687.404	1	29.59	7319100	1	7695	Banda_5_821.raw	1	1	52	58			PEAKS DB
2	2	A0A1S2YP37|A0A1S2YP37_CICAR	R.E(-18.01)VAEAFLGHSVK.N	Y	44.76	1267.66	12	8	634.836	2	51.04	2199100	1	17333	Banda_5_821.raw	1	1	132	143	Pyro-glu from E	E1:Pyro-glu from E:1000.00	PEAKS DB
2	2	A0A1S2YP37|A0A1S2YP37_CICAR	R.YKAEDEEVKK.K	Y	43.33	1237.62	10	0	413.547	3	50.16	17615000	1	16658	Banda_5_821.raw	1	1	530	539			PEAKS DB
2	2	A0A1S2YP37|A0A1S2YP37_CICAR	R.LSKEEIEK.M	N	42.85	974.528	8	0	488.272	2	48.16	30619000	1	16071	Banda_5_821.raw	1	1	515	522			PEAKS DB
2	2	A0A1S2YP37|A0A1S2YP37_CICAR	K.LSVEDKEK.I	Y	41.77	946.497	8	0	474.256	2	48.34	0	1	15977	Banda_5_821.raw	0	0	567	574			PEAKS DB
2	2	A0A1S2YP37|A0A1S2YP37_CICAR	L.TIEEGIFEVK.A	N	41.26	1163.61	10	18	582.812	2	50.57	10731000	1	17399	Banda_5_821.raw	1	1	216	225			PEAKS DB
2	2	A0A1S2YP37|A0A1S2YP37_CICAR	K.C(+57.02)M(+15.99)EPVEK.C	N	40.66	907.378	7	-7	454.696	2	24.17	3044800	1	5374	Banda_5_821.raw	1	1	318	324	Carbamidomethylation; Oxidation (M)	C1:Carbamidomethylation:1000.00;M2:Oxidation (M):1000.00	PEAKS DB
2	2	A0A1S2YP37|A0A1S2YP37_CICAR	K.AIGIDLGTTYSC(+57.02)VGVWQNDR.V	Y	40.2	2224.06	20	0	1113.04	2	51.76	1076200	1	17628	Banda_5_821.raw	1	1	8	27	Carbamidomethylation	C12:Carbamidomethylation:1000.00	PEAKS DB
2	2	A0A1S2YP37|A0A1S2YP37_CICAR	K.VIPGPADKPM(+15.99)IVVNYKGEEK.K	Y	39.56	2199.16	20	10	550.798	4	51.04	11607000	1	17242	Banda_5_821.raw	1	1	96	115	Oxidation (M)	M10:Oxidation (M):1000.00	PEAKS DB
2	2	A0A1S2YP37|A0A1S2YP37_CICAR	R.RFSDESVQNDM(+15.99)K.L	Y	39.38	1470.64	12	5	491.221	3	48.32	4981500	1	15794	Banda_5_821.raw	2	2	79	90	Oxidation (M)	M11:Oxidation (M):1000.00	PEAKS DB
2	2	A0A1S2YP37|A0A1S2YP37_CICAR	R.TKDNNLLGK.F	N	36.91	1001.55	9	4	501.783	2	48.9	27772000	1	16072	Banda_5_821.raw	1	1	455	463			PEAKS DB
2	2	A0A1S2YP37|A0A1S2YP37_CICAR	K.NSLENYAYNMR.N	N	36.77	1373.6	11	10	687.81	2	46.82	3745300	1	15022	Banda_5_821.raw	1	1	545	555			PEAKS DB
2	2	A0A1S2YP37|A0A1S2YP37_CICAR	K.ITITNDK.G	N	36.35	803.439	7	-7	402.726	2	29.36	88532000	1	7376	Banda_5_821.raw	1	1	506	512			PEAKS DB
2	2	A0A1S2YP37|A0A1S2YP37_CICAR	R.EVAEAFLGH.S	Y	36.23	971.471	9	-4	486.743	2	47.09	9494300	1	15555	Banda_5_821.raw	1	1	132	140			PEAKS DB
2	2	A0A1S2YP37|A0A1S2YP37_CICAR	R.Q(-17.03)ATKDAGAISGLNVLR.I	Y	34.26	1595.86	16	-10	798.938	2	49.02	30639	1	16402	Banda_5_821.raw	1	1	159	174	Pyro-glu from Q	Q1:Pyro-glu from Q:1000.00	PEAKS DB
5	9	A0A3Q7XXP6|A0A3Q7XXP6_CICAR	K.ATAGDTHLGGEDFDNR.M	N	92.01	1674.72	16	14	838.37	2	48.21	131380000	1	16148	Banda_5_821.raw	2	2	227	242			PEAKS DB
5	9	A0A3Q7XXP6|A0A3Q7XXP6_CICAR	K.NAVVTVPAYFNDSQR.Q	N	91.58	1679.83	15	1	840.921	2	48.09	104240000	1	15926	Banda_5_821.raw	4	4	145	159			PEAKS DB
5	9	A0A3Q7XXP6|A0A3Q7XXP6_CICAR	R.IINEPTAAAIAYGLDK.K	N	79.96	1658.89	16	12	830.452	2	50.57	86804000	1	17255	Banda_5_821.raw	2	2	176	191			PEAKS DB
5	9	A0A3Q7XXP6|A0A3Q7XXP6_CICAR	L.SLGLETAGGVM(+15.99)TVLIPR.N	N	71.75	1728.94	17	17	865.481	2	51.78	654400	1	17540	Banda_5_821.raw	2	2	406	422	Oxidation (M)	M11:Oxidation (M):1000.00	PEAKS DB
5	9	A0A3Q7XXP6|A0A3Q7XXP6_CICAR	R.IINEPTAAAIAYGLDKK.A	N	68.76	1786.98	17	17	596.669	3	51.63	105790000	1	17444	Banda_5_821.raw	2	2	176	192			PEAKS DB
5	9	A0A3Q7XXP6|A0A3Q7XXP6_CICAR	R.EIAEAYLGSTVK.N	N	64.68	1279.67	12	15	640.841	2	44.84	1947100	1	14544	Banda_5_821.raw	1	1	133	144			PEAKS DB
5	9	A0A3Q7XXP6|A0A3Q7XXP6_CICAR	L.SLGLETAGGVMTVLIPR.N	N	60.4	1712.95	17	18	857.484	2	54.85	1858800	1	19198	Banda_5_821.raw	1	1	406	422			PEAKS DB
5	9	A0A3Q7XXP6|A0A3Q7XXP6_CICAR	R.FEELNM(+15.99)DLFR.K	N	60	1328.61	10	16	665.312	2	51.16	11757000	1	17653	Banda_5_821.raw	1	1	308	317	Oxidation (M)	M6:Oxidation (M):1000.00	PEAKS DB
5	9	A0A3Q7XXP6|A0A3Q7XXP6_CICAR	R.FEELNMDLFR.K	N	59.72	1312.61	10	13	657.314	2	53.35	2941900	1	18326	Banda_5_821.raw	1	1	308	317			PEAKS DB
5	9	A0A3Q7XXP6|A0A3Q7XXP6_CICAR	K.NQVAM(+15.99)NPTNTVFDAK.R	N	58.03	1664.78	15	6	833.399	2	38.34	2398500	1	11250	Banda_5_821.raw	1	1	60	74	Oxidation (M)	M5:Oxidation (M):1000.00	PEAKS DB
5	9	A0A3Q7XXP6|A0A3Q7XXP6_CICAR	S.LLTIEEGIFEVK.A	N	55.5	1389.78	12	15	695.896	2	53.73	1197300	1	18801	Banda_5_821.raw	1	1	215	226			PEAKS DB
5	9	A0A3Q7XXP6|A0A3Q7XXP6_CICAR	L.GLETAGGVMTVLIPR.N	N	55.4	1512.83	15	6	757.424	2	53.42	460420	1	18588	Banda_5_821.raw	1	1	408	422			PEAKS DB
5	9	A0A3Q7XXP6|A0A3Q7XXP6_CICAR	K.NSLENYAYNM(+15.99)R.N	N	54.5	1389.6	11	8	695.807	2	39.05	29612000	1	11682	Banda_5_821.raw	1	1	868	878	Oxidation (M)	M10:Oxidation (M):1000.00	PEAKS DB
5	9	A0A3Q7XXP6|A0A3Q7XXP6_CICAR	N.AVVTVPAYFNDSQR.Q	N	52.99	1565.78	14	14	783.9	2	48.55	3974200	1	16169	Banda_5_821.raw	1	1	146	159			PEAKS DB
5	9	A0A3Q7XXP6|A0A3Q7XXP6_CICAR	R.VEIIANDQGNR.T	N	50.99	1227.62	11	22	614.819	2	34.05	4772600	1	9726	Banda_5_821.raw	1	1	29	39			PEAKS DB
5	9	A0A3Q7XXP6|A0A3Q7XXP6_CICAR	K.SINPDEAVAYGAAVQAAILSGEGNEK.V	N	48.69	2573.26	26	3	858.761	3	53.38	0	1	18522	Banda_5_821.raw	0	0	368	393			PEAKS DB
5	9	A0A3Q7XXP6|A0A3Q7XXP6_CICAR	R.IINEPTAAAIAY.G	N	46.99	1245.66	12	9	623.838	2	39.94	9301500	1	12047	Banda_5_821.raw	1	1	176	187			PEAKS DB
5	9	A0A3Q7XXP6|A0A3Q7XXP6_CICAR	R.LIGDAAK.N	N	45.52	686.396	7	2	687.404	1	29.59	7319100	1	7695	Banda_5_821.raw	1	1	53	59			PEAKS DB
5	9	A0A3Q7XXP6|A0A3Q7XXP6_CICAR	R.TTPSYVAFTDSER.L	Y	45.05	1472.68	13	16	737.348	2	44.7	2849100	1	14077	Banda_5_821.raw	1	1	40	52			PEAKS DB
5	9	A0A3Q7XXP6|A0A3Q7XXP6_CICAR	R.ISDASVQSDM(+15.99)K.L	N	43.55	1195.54	11	10	598.777	2	25.39	0	1	5807	Banda_5_821.raw	0	0	81	91	Oxidation (M)	M10:Oxidation (M):1000.00	PEAKS DB
5	9	A0A3Q7XXP6|A0A3Q7XXP6_CICAR	K.NQVAMNPTNTVFDAK.R	N	43.14	1648.79	15	-1	825.401	2	44.15	2620	1	13945	Banda_5_821.raw	1	1	60	74			PEAKS DB
5	9	A0A3Q7XXP6|A0A3Q7XXP6_CICAR	R.LSKEEIEK.M	N	42.85	974.528	8	0	488.272	2	48.16	30619000	1	16071	Banda_5_821.raw	1	1	838	845			PEAKS DB
5	9	A0A3Q7XXP6|A0A3Q7XXP6_CICAR	L.TIEEGIFEVK.A	N	41.26	1163.61	10	18	582.812	2	50.57	10731000	1	17399	Banda_5_821.raw	1	1	217	226			PEAKS DB
5	9	A0A3Q7XXP6|A0A3Q7XXP6_CICAR	K.C(+57.02)M(+15.99)EPVEK.C	N	40.66	907.378	7	-7	454.696	2	24.17	3044800	1	5374	Banda_5_821.raw	1	1	319	325	Carbamidomethylation; Oxidation (M)	C1:Carbamidomethylation:1000.00;M2:Oxidation (M):1000.00	PEAKS DB
5	9	A0A3Q7XXP6|A0A3Q7XXP6_CICAR	R.TKDNNLLGK.F	N	36.91	1001.55	9	4	501.783	2	48.9	27772000	1	16072	Banda_5_821.raw	1	1	778	786			PEAKS DB
5	9	A0A3Q7XXP6|A0A3Q7XXP6_CICAR	K.NSLENYAYNMR.N	N	36.77	1373.6	11	10	687.81	2	46.82	3745300	1	15022	Banda_5_821.raw	1	1	868	878			PEAKS DB
5	9	A0A3Q7XXP6|A0A3Q7XXP6_CICAR	K.ITITNDK.G	N	36.35	803.439	7	-7	402.726	2	29.36	88532000	1	7376	Banda_5_821.raw	1	1	829	835			PEAKS DB
3	4	A0A1S2YEC8|A0A1S2YEC8_CICAR	R.DAVVTVPAYFNDAQR.Q	N	85.28	1664.82	15	16	833.417	2	48.13	14146000	1	16102	Banda_5_821.raw	1	1	173	187			PEAKS DB
3	4	A0A1S2YEC8|A0A1S2YEC8_CICAR	R.IINEPTAAAIAYGLDK.K	N	79.96	1658.89	16	12	830.452	2	50.57	86804000	1	17255	Banda_5_821.raw	2	2	204	219			PEAKS DB
3	4	A0A1S2YEC8|A0A1S2YEC8_CICAR	K.FDLSGIPPAPR.G	Y	77.61	1168.62	11	6	585.32	2	49.23	12384000	1	16500	Banda_5_821.raw	1	1	490	500			PEAKS DB
3	4	A0A1S2YEC8|A0A1S2YEC8_CICAR	Y.QDQQTTVSIQVFEGER.S	N	72.65	1863.9	16	23	932.957	2	43.13	1408	1	13530	Banda_5_821.raw	1	1	463	478			PEAKS DB
3	4	A0A1S2YEC8|A0A1S2YEC8_CICAR	K.NQIDEIVLVGGSTR.I	N	69.25	1499.79	14	6	750.905	2	49.39	12082000	1	16654	Banda_5_821.raw	1	1	360	373			PEAKS DB
3	4	A0A1S2YEC8|A0A1S2YEC8_CICAR	R.VEIESLFDGVDFSESLTR.A	Y	68.8	2041.98	18	12	1022	2	54.55	2691100	1	18907	Banda_5_821.raw	2	2	313	330			PEAKS DB
3	4	A0A1S2YEC8|A0A1S2YEC8_CICAR	R.IINEPTAAAIAYGLDKK.G	N	68.76	1786.98	17	17	596.669	3	51.63	105790000	1	17444	Banda_5_821.raw	2	2	204	220			PEAKS DB
3	4	A0A1S2YEC8|A0A1S2YEC8_CICAR	K.EVEAVC(+57.02)NPIITAVYQR.S	N	63.39	1860.94	16	-5	931.477	2	51.33	152340	1	17373	Banda_5_821.raw	1	1	630	645	Carbamidomethylation	C6:Carbamidomethylation:1000.00	PEAKS DB
3	4	A0A1S2YEC8|A0A1S2YEC8_CICAR	K.NLAAVNPER.T	N	59.89	982.519	9	-3	492.267	2	35.04	31786000	1	10696	Banda_5_821.raw	2	2	88	96			PEAKS DB
3	4	A0A1S2YEC8|A0A1S2YEC8_CICAR	R.FEELNNDLFR.K	N	58.02	1295.61	10	5	648.815	2	50.97	5012200	1	17113	Banda_5_821.raw	1	1	333	342			PEAKS DB
3	4	A0A1S2YEC8|A0A1S2YEC8_CICAR	R.ITPSWVAFTDSER.L	N	57.14	1507.73	13	3	754.873	2	51.57	11534000	1	17459	Banda_5_821.raw	1	1	68	80			PEAKS DB
3	4	A0A1S2YEC8|A0A1S2YEC8_CICAR	K.NGHVEIIANDQGNR.I	N	54.88	1535.74	14	7	512.922	3	48.46	6200	1	16289	Banda_5_821.raw	2	2	54	67			PEAKS DB
3	4	A0A1S2YEC8|A0A1S2YEC8_CICAR	K.AM(+15.99)DDAGLQK.N	N	53.94	963.433	9	-5	482.724	2	25.48	235440	1	5845	Banda_5_821.raw	1	1	351	359	Oxidation (M)	M2:Oxidation (M):1000.00	PEAKS DB
3	4	A0A1S2YEC8|A0A1S2YEC8_CICAR	K.SQVFTTYQDQQTTVSIQVFEGER.S	N	52.05	2690.28	23	-4	1346.15	2	50.02	308070	1	16701	Banda_5_821.raw	1	1	456	478			PEAKS DB
3	4	A0A1S2YEC8|A0A1S2YEC8_CICAR	K.VFSPEEISAMILTK.M	N	51.66	1563.82	14	16	782.919	2	55	2616200	1	19100	Banda_5_821.raw	1	1	145	158			PEAKS DB
3	4	A0A1S2YEC8|A0A1S2YEC8_CICAR	H.VEIIANDQGNR.I	N	50.99	1227.62	11	22	614.819	2	34.05	4772600	1	9726	Banda_5_821.raw	1	1	57	67			PEAKS DB
3	4	A0A1S2YEC8|A0A1S2YEC8_CICAR	K.DAGVIAGLNVAR.I	N	50.55	1154.64	12	6	578.328	2	46.94	1593000	1	15233	Banda_5_821.raw	1	1	192	203			PEAKS DB
3	4	A0A1S2YEC8|A0A1S2YEC8_CICAR	R.IINEPTAAAIAY.G	N	46.99	1245.66	12	9	623.838	2	39.94	9301500	1	12047	Banda_5_821.raw	1	1	204	215			PEAKS DB
3	4	A0A1S2YEC8|A0A1S2YEC8_CICAR	K.EALEWLDDNQSVEKEDYEEK.L	Y	46.4	2468.09	20	12	823.704	3	51.26	1052600	1	17634	Banda_5_821.raw	1	1	608	627			PEAKS DB
3	4	A0A1S2YEC8|A0A1S2YEC8_CICAR	R.EAEEFAEEDK.K	N	45.29	1195.49	10	-4	598.751	2	29.13	1712800	1	7486	Banda_5_821.raw	1	1	552	561			PEAKS DB
3	4	A0A1S2YEC8|A0A1S2YEC8_CICAR	K.ETAEAFLGK.T	N	43.81	964.486	9	-2	483.25	2	44.24	4358700	1	14209	Banda_5_821.raw	1	1	161	169			PEAKS DB
3	4	A0A1S2YEC8|A0A1S2YEC8_CICAR	R.LIGEAAK.N	N	42.83	700.412	7	0	701.419	1	29.63	734850	1	7719	Banda_5_821.raw	1	1	81	87			PEAKS DB
3	4	A0A1S2YEC8|A0A1S2YEC8_CICAR	K.DGKPYIQVK.I	Y	37.4	1046.58	9	14	524.296	2	48.28	4129300	1	16202	Banda_5_821.raw	1	1	129	137			PEAKS DB
3	4	A0A1S2YEC8|A0A1S2YEC8_CICAR	K.LKEVEAVC(+57.02)NPIITAVYQR.S	N	37.23	2102.12	18	18	701.715	3	52.33	305460	1	17993	Banda_5_821.raw	1	1	628	645	Carbamidomethylation	C8:Carbamidomethylation:1000.00	PEAKS DB
3	4	A0A1S2YEC8|A0A1S2YEC8_CICAR	K.GVNPDEAVAFGAAVQGSILSGEGGEETK.D	N	37.18	2688.29	28	18	897.105	3	51.97	1776200	1	17780	Banda_5_821.raw	1	1	393	420			PEAKS DB
3	4	A0A1S2YEC8|A0A1S2YEC8_CICAR	R.EAEEFAEEDKK.V	N	36.57	1323.58	11	-8	662.798	2	46.59	1504200	1	15559	Banda_5_821.raw	1	1	552	562			PEAKS DB
3	4	A0A1S2YEC8|A0A1S2YEC8_CICAR	R.LSQEEIDR.M	N	36.54	988.482	8	4	989.49	1	29.87	0	1	7741	Banda_5_821.raw	0	0	541	548			PEAKS DB
3	4	A0A1S2YEC8|A0A1S2YEC8_CICAR	K.VFSPEEISAM(+15.99)ILTK.M	N	35	1579.82	14	16	790.917	2	52.82	5874300	1	18484	Banda_5_821.raw	1	1	145	158	Oxidation (M)	M10:Oxidation (M):1000.00	PEAKS DB
4	7	A0A1S2YEC3|A0A1S2YEC3_CICAR	R.DAVVTVPAYFNDAQR.Q	N	85.28	1664.82	15	16	833.417	2	48.13	14146000	1	16102	Banda_5_821.raw	1	1	173	187			PEAKS DB
4	7	A0A1S2YEC3|A0A1S2YEC3_CICAR	R.IINEPTAAAIAYGLDK.K	N	79.96	1658.89	16	12	830.452	2	50.57	86804000	1	17255	Banda_5_821.raw	2	2	204	219			PEAKS DB
4	7	A0A1S2YEC3|A0A1S2YEC3_CICAR	Y.QDQQTTVSIQVFEGER.S	N	72.65	1863.9	16	23	932.957	2	43.13	1408	1	13530	Banda_5_821.raw	1	1	463	478			PEAKS DB
4	7	A0A1S2YEC3|A0A1S2YEC3_CICAR	R.LLGNFELTGIPPAPR.G	Y	71.17	1593.89	15	14	797.952	2	52.57	2455800	1	18030	Banda_5_821.raw	1	1	486	500			PEAKS DB
4	7	A0A1S2YEC3|A0A1S2YEC3_CICAR	K.NQIDEIVLVGGSTR.I	N	69.25	1499.79	14	6	750.905	2	49.39	12082000	1	16654	Banda_5_821.raw	1	1	360	373			PEAKS DB
4	7	A0A1S2YEC3|A0A1S2YEC3_CICAR	R.IINEPTAAAIAYGLDKK.G	N	68.76	1786.98	17	17	596.669	3	51.63	105790000	1	17444	Banda_5_821.raw	2	2	204	220			PEAKS DB
4	7	A0A1S2YEC3|A0A1S2YEC3_CICAR	K.EVEAVC(+57.02)NPIITAVYQR.S	N	63.39	1860.94	16	-5	931.477	2	51.33	152340	1	17373	Banda_5_821.raw	1	1	630	645	Carbamidomethylation	C6:Carbamidomethylation:1000.00	PEAKS DB
4	7	A0A1S2YEC3|A0A1S2YEC3_CICAR	K.NLAAVNPER.T	N	59.89	982.519	9	-3	492.267	2	35.04	31786000	1	10696	Banda_5_821.raw	2	2	88	96			PEAKS DB
4	7	A0A1S2YEC3|A0A1S2YEC3_CICAR	R.FEELNNDLFR.K	N	58.02	1295.61	10	5	648.815	2	50.97	5012200	1	17113	Banda_5_821.raw	1	1	333	342			PEAKS DB
4	7	A0A1S2YEC3|A0A1S2YEC3_CICAR	R.ITPSWVAFTDSER.L	N	57.14	1507.73	13	3	754.873	2	51.57	11534000	1	17459	Banda_5_821.raw	1	1	68	80			PEAKS DB
4	7	A0A1S2YEC3|A0A1S2YEC3_CICAR	K.NGHVEIIANDQGNR.I	N	54.88	1535.74	14	7	512.922	3	48.46	6200	1	16289	Banda_5_821.raw	2	2	54	67			PEAKS DB
4	7	A0A1S2YEC3|A0A1S2YEC3_CICAR	K.AM(+15.99)DDAGLQK.N	N	53.94	963.433	9	-5	482.724	2	25.48	235440	1	5845	Banda_5_821.raw	1	1	351	359	Oxidation (M)	M2:Oxidation (M):1000.00	PEAKS DB
4	7	A0A1S2YEC3|A0A1S2YEC3_CICAR	K.SQVFTTYQDQQTTVSIQVFEGER.S	N	52.05	2690.28	23	-4	1346.15	2	50.02	308070	1	16701	Banda_5_821.raw	1	1	456	478			PEAKS DB
4	7	A0A1S2YEC3|A0A1S2YEC3_CICAR	K.VFSPEEISAMILTK.M	N	51.66	1563.82	14	16	782.919	2	55	2616200	1	19100	Banda_5_821.raw	1	1	145	158			PEAKS DB
4	7	A0A1S2YEC3|A0A1S2YEC3_CICAR	H.VEIIANDQGNR.I	N	50.99	1227.62	11	22	614.819	2	34.05	4772600	1	9726	Banda_5_821.raw	1	1	57	67			PEAKS DB
4	7	A0A1S2YEC3|A0A1S2YEC3_CICAR	K.DAGVIAGLNVAR.I	N	50.55	1154.64	12	6	578.328	2	46.94	1593000	1	15233	Banda_5_821.raw	1	1	192	203			PEAKS DB
4	7	A0A1S2YEC3|A0A1S2YEC3_CICAR	R.IINEPTAAAIAY.G	N	46.99	1245.66	12	9	623.838	2	39.94	9301500	1	12047	Banda_5_821.raw	1	1	204	215			PEAKS DB
4	7	A0A1S2YEC3|A0A1S2YEC3_CICAR	R.EAEEFAEEDK.K	N	45.29	1195.49	10	-4	598.751	2	29.13	1712800	1	7486	Banda_5_821.raw	1	1	552	561			PEAKS DB
4	7	A0A1S2YEC3|A0A1S2YEC3_CICAR	K.ETAEAFLGK.T	N	43.81	964.486	9	-2	483.25	2	44.24	4358700	1	14209	Banda_5_821.raw	1	1	161	169			PEAKS DB
4	7	A0A1S2YEC3|A0A1S2YEC3_CICAR	R.LIGEAAK.N	N	42.83	700.412	7	0	701.419	1	29.63	734850	1	7719	Banda_5_821.raw	1	1	81	87			PEAKS DB
4	7	A0A1S2YEC3|A0A1S2YEC3_CICAR	R.VEIESLFDGVDFSEPLTR.A	Y	40.14	2052.01	18	11	1027.01	2	54.96	918530	1	19415	Banda_5_821.raw	1	1	313	330			PEAKS DB
4	7	A0A1S2YEC3|A0A1S2YEC3_CICAR	K.LKEVEAVC(+57.02)NPIITAVYQR.S	N	37.23	2102.12	18	18	701.715	3	52.33	305460	1	17993	Banda_5_821.raw	1	1	628	645	Carbamidomethylation	C8:Carbamidomethylation:1000.00	PEAKS DB
4	7	A0A1S2YEC3|A0A1S2YEC3_CICAR	K.GVNPDEAVAFGAAVQGSILSGEGGEETK.D	N	37.18	2688.29	28	18	897.105	3	51.97	1776200	1	17780	Banda_5_821.raw	1	1	393	420			PEAKS DB
4	7	A0A1S2YEC3|A0A1S2YEC3_CICAR	R.EAEEFAEEDKK.V	N	36.57	1323.58	11	-8	662.798	2	46.59	1504200	1	15559	Banda_5_821.raw	1	1	552	562			PEAKS DB
4	7	A0A1S2YEC3|A0A1S2YEC3_CICAR	R.LSQEEIDR.M	N	36.54	988.482	8	4	989.49	1	29.87	0	1	7741	Banda_5_821.raw	0	0	541	548			PEAKS DB
4	7	A0A1S2YEC3|A0A1S2YEC3_CICAR	K.VFSPEEISAM(+15.99)ILTK.M	N	35	1579.82	14	16	790.917	2	52.82	5874300	1	18484	Banda_5_821.raw	1	1	145	158	Oxidation (M)	M10:Oxidation (M):1000.00	PEAKS DB
10	10	A0A3Q7YAD4|A0A3Q7YAD4_CICAR	K.SNLDPTIYGDQTSK.I	Y	89.88	1537.73	14	5	769.871	2	36.74	18567000	1	10530	Banda_5_821.raw	1	1	391	404			PEAKS DB
10	10	A0A3Q7YAD4|A0A3Q7YAD4_CICAR	R.QSLINADGIIEK.T	Y	75.72	1299.7	12	5	650.859	2	47.84	8441900	1	15705	Banda_5_821.raw	1	1	565	576			PEAKS DB
10	10	A0A3Q7YAD4|A0A3Q7YAD4_CICAR	R.LLPEQGTSQYEEM(+15.99)VK.S	Y	74.58	1766.84	15	6	884.428	2	35.48	13108000	1	10276	Banda_5_821.raw	2	2	735	749	Oxidation (M)	M13:Oxidation (M):1000.00	PEAKS DB
10	10	A0A3Q7YAD4|A0A3Q7YAD4_CICAR	K.LPLDVISTISPLPVIK.E	Y	72.71	1704.04	16	16	853.03	2	55.61	18659000	1	19737	Banda_5_821.raw	2	2	321	336			PEAKS DB
10	10	A0A3Q7YAD4|A0A3Q7YAD4_CICAR	K.YGVEM(+15.99)SSAVYK.N	Y	68.65	1248.57	11	9	625.293	2	34.73	6093200	1	9580	Banda_5_821.raw	1	1	583	593	Oxidation (M)	M5:Oxidation (M):1000.00	PEAKS DB
10	10	A0A3Q7YAD4|A0A3Q7YAD4_CICAR	K.ITADVMELDGC(+57.02)TIEEALASGR.L	Y	67.76	2250.05	21	-5	1126.03	2	53.77	246010	1	18626	Banda_5_821.raw	1	1	405	425	Carbamidomethylation	C11:Carbamidomethylation:1000.00	PEAKS DB
10	10	A0A3Q7YAD4|A0A3Q7YAD4_CICAR	R.DTM(+15.99)NINALAR.Q	N	58.68	1133.55	10	-9	567.782	2	33.86	15755000	1	9568	Banda_5_821.raw	1	1	555	564	Oxidation (M)	M3:Oxidation (M):1000.00	PEAKS DB
10	10	A0A3Q7YAD4|A0A3Q7YAD4_CICAR	K.TYLPSETPSPLVK.Y	Y	57.71	1430.77	13	11	716.391	2	47.03	5198500	1	15378	Banda_5_821.raw	1	1	170	182			PEAKS DB
10	10	A0A3Q7YAD4|A0A3Q7YAD4_CICAR	R.Q(-17.03)SLINADGIIEK.T	Y	57.57	1282.68	12	5	642.346	2	43.47	6428300	1	13556	Banda_5_821.raw	1	1	565	576	Pyro-glu from Q	Q1:Pyro-glu from Q:1000.00	PEAKS DB
10	10	A0A3Q7YAD4|A0A3Q7YAD4_CICAR	K.YGVEMSSAVYK.N	Y	53.48	1232.57	11	-2	617.294	2	44.19	3162700	1	14016	Banda_5_821.raw	1	1	583	593			PEAKS DB
10	10	A0A3Q7YAD4|A0A3Q7YAD4_CICAR	R.TDGEQVLK.F	N	51.28	888.455	8	-4	445.235	2	29.45	24039000	1	7465	Banda_5_821.raw	1	1	341	348			PEAKS DB
10	10	A0A3Q7YAD4|A0A3Q7YAD4_CICAR	R.HASDEVYLGER.E	N	49.22	1274.59	11	-4	638.302	2	49.57	5326400	1	16406	Banda_5_821.raw	2	2	778	788			PEAKS DB
10	10	A0A3Q7YAD4|A0A3Q7YAD4_CICAR	K.SEKPATEVYVPR.D	Y	46.66	1374.71	12	7	688.365	2	49.31	18955000	1	16398	Banda_5_821.raw	2	2	253	264			PEAKS DB
10	10	A0A3Q7YAD4|A0A3Q7YAD4_CICAR	K.ITADVM(+15.99)ELDGC(+57.02)TIEEALASGR.L	Y	45.84	2266.05	21	9	1134.03	2	51.76	480280	1	17552	Banda_5_821.raw	1	1	405	425	Oxidation (M); Carbamidomethylation	M6:Oxidation (M):1000.00;C11:Carbamidomethylation:1000.00	PEAKS DB
10	10	A0A3Q7YAD4|A0A3Q7YAD4_CICAR	R.SVSLQLISATK.S	N	45.42	1145.67	11	-4	573.84	2	49.44	10583000	1	16746	Banda_5_821.raw	1	1	65	75			PEAKS DB
10	10	A0A3Q7YAD4|A0A3Q7YAD4_CICAR	K.DSSSPYGLR.L	Y	45.36	980.456	9	9	491.236	2	33.86	11583000	1	9205	Banda_5_821.raw	1	1	615	623			PEAKS DB
10	10	A0A3Q7YAD4|A0A3Q7YAD4_CICAR	R.DLFEGGIK.L	Y	45.04	877.455	8	19	878.463	1	48.94	865650	1	16286	Banda_5_821.raw	1	1	313	320			PEAKS DB
10	10	A0A3Q7YAD4|A0A3Q7YAD4_CICAR	R.DTMNINALAR.Q	N	44.76	1117.55	10	1	559.785	2	44.16	3684100	1	13852	Banda_5_821.raw	1	1	555	564			PEAKS DB
10	10	A0A3Q7YAD4|A0A3Q7YAD4_CICAR	K.NWVFPDQALPNDLIK.R	Y	38.11	1768.91	15	9	885.466	2	53.73	4892300	1	19029	Banda_5_821.raw	1	1	594	608			PEAKS DB
10	10	A0A3Q7YAD4|A0A3Q7YAD4_CICAR	R.Q(-17.03)LSVLHPIHK.L	Y	35.39	1153.66	10	2	577.838	2	51.55	75570	1	17478	Banda_5_821.raw	1	1	538	547	Pyro-glu from Q	Q1:Pyro-glu from Q:1000.00	PEAKS DB
10	10	A0A3Q7YAD4|A0A3Q7YAD4_CICAR	K.SAWMTDEEFAR.E	N	34.43	1341.57	11	1	671.79	2	49.9	846740	1	16689	Banda_5_821.raw	1	1	360	370			PEAKS DB
14	6	A0A1S2Y7Y8|A0A1S2Y7Y8_CICAR	K.Q(-17.03)SITSLGVAPIPLTPDYGGPVVSYADGVLDTR.F	Y	86.5	3240.66	32	17	1081.23	3	59.33	703280	1	21161	Banda_5_821.raw	1	1	162	193	Pyro-glu from Q	Q1:Pyro-glu from Q:1000.00	PEAKS DB
14	6	A0A1S2Y7Y8|A0A1S2Y7Y8_CICAR	R.AVLVLEPENPGGEAVDITPK.E	Y	75.2	2047.08	20	9	1024.55	2	49.69	9864700	1	16880	Banda_5_821.raw	2	2	107	126			PEAKS DB
14	6	A0A1S2Y7Y8|A0A1S2Y7Y8_CICAR	K.SPITADVVSGASK.R	Y	74.4	1230.65	13	13	616.331	2	38.66	0	1	11496	Banda_5_821.raw	0	0	69	81			PEAKS DB
14	6	A0A1S2Y7Y8|A0A1S2Y7Y8_CICAR	K.AGASLYGVADLK.L	Y	69.61	1163.62	12	-2	582.817	2	48.3	9225200	1	15893	Banda_5_821.raw	1	1	593	604			PEAKS DB
14	6	A0A1S2Y7Y8|A0A1S2Y7Y8_CICAR	K.VVPVYSLDAEFAR.P	Y	68.91	1464.76	13	9	733.389	2	51.65	9711900	1	17553	Banda_5_821.raw	2	2	329	341			PEAKS DB
14	6	A0A1S2Y7Y8|A0A1S2Y7Y8_CICAR	R.ESSQNPPTTIVSIALGSK.D	Y	68.37	1827.96	18	2	610.327	3	50.91	10022000	1	17293	Banda_5_821.raw	2	2	206	223			PEAKS DB
14	6	A0A1S2Y7Y8|A0A1S2Y7Y8_CICAR	K.Q(-17.03)SNLIAC(+57.02)TYR.Q	Y	65.81	1207.57	10	10	604.791	2	36.97	387060	1	10730	Banda_5_821.raw	1	1	359	368	Pyro-glu from Q; Carbamidomethylation	Q1:Pyro-glu from Q:1000.00;C7:Carbamidomethylation:1000.00	PEAKS DB
14	6	A0A1S2Y7Y8|A0A1S2Y7Y8_CICAR	K.DVKEPEVLVGGSDFYAFPR.V	Y	60.28	2124.05	19	11	709.026	3	52.55	1920100	1	17999	Banda_5_821.raw	1	1	224	242			PEAKS DB
14	6	A0A1S2Y7Y8|A0A1S2Y7Y8_CICAR	R.FNVADEITPVK.I	Y	59.53	1231.64	11	4	616.83	2	48.09	8727700	1	15814	Banda_5_821.raw	1	1	710	720			PEAKS DB
14	6	A0A1S2Y7Y8|A0A1S2Y7Y8_CICAR	R.LGGTAVDGR.G	Y	57.47	844.44	9	-1	423.227	2	28.87	8406900	1	7367	Banda_5_821.raw	2	2	83	91			PEAKS DB
14	6	A0A1S2Y7Y8|A0A1S2Y7Y8_CICAR	K.VVPPAQAR.K	Y	54.86	836.487	8	-8	419.25	2	27.31	9336300	1	6787	Banda_5_821.raw	2	2	654	661			PEAKS DB
14	6	A0A1S2Y7Y8|A0A1S2Y7Y8_CICAR	R.GWAFADVNYGGSTGYGR.E	Y	49.74	1776.79	17	7	889.401	2	51.11	1042400	1	17170	Banda_5_821.raw	1	1	517	533			PEAKS DB
14	6	A0A1S2Y7Y8|A0A1S2Y7Y8_CICAR	K.QSITSLGVAPIPLTPDYGGPVVSYADGVLDTR.F	Y	48.13	3257.68	32	10	1086.9	3	59.35	906660	1	21102	Banda_5_821.raw	1	1	162	193			PEAKS DB
14	6	A0A1S2Y7Y8|A0A1S2Y7Y8_CICAR	K.VVDFNIIWSSSPDSLK.Y	Y	47.77	1805.92	16	9	903.968	2	53.73	683410	1	18539	Banda_5_821.raw	1	1	431	446			PEAKS DB
14	6	A0A1S2Y7Y8|A0A1S2Y7Y8_CICAR	R.VC(+57.02)VAGYDPSVVESPTEPK.W	Y	46.49	1932.91	18	14	967.466	2	41.61	1380500	1	12653	Banda_5_821.raw	1	1	282	299	Carbamidomethylation	C2:Carbamidomethylation:1000.00	PEAKS DB
14	6	A0A1S2Y7Y8|A0A1S2Y7Y8_CICAR	K.EPEVLVGGSDFYAFPR.V	Y	46.48	1781.86	16	3	891.939	2	52.4	686040	1	17868	Banda_5_821.raw	1	1	227	242			PEAKS DB
14	6	A0A1S2Y7Y8|A0A1S2Y7Y8_CICAR	R.RESSQNPPTTIVSIALGSK.D	Y	46.32	1984.06	19	17	662.361	3	52.1	289480	1	17928	Banda_5_821.raw	1	1	205	223			PEAKS DB
14	6	A0A1S2Y7Y8|A0A1S2Y7Y8_CICAR	K.GVPVALVEYEGEQHGFR.K	Y	36.17	1885.93	17	12	629.652	3	52.23	495910	1	17923	Banda_5_821.raw	1	1	671	687			PEAKS DB
14	6	A0A1S2Y7Y8|A0A1S2Y7Y8_CICAR	R.SPINHVDK.F	Y	36	908.472	8	-11	455.243	2	48.25	1035600	1	15864	Banda_5_821.raw	1	1	632	639			PEAKS DB
14	6	A0A1S2Y7Y8|A0A1S2Y7Y8_CICAR	R.AIDGEKPPLLLK.S	Y	34.83	1292.77	12	6	647.393	2	51.55	1667300	1	18020	Banda_5_821.raw	1	1	482	493			PEAKS DB
12	11	A0A1S2Y087|A0A1S2Y087_CICAR	R.NFLAGEDDNVISQIQNPVK.E	Y	92.24	2100.05	19	0	1051.03	2	50.54	13338000	1	17358	Banda_5_821.raw	2	2	525	543			PEAKS DB
12	11	A0A1S2Y087|A0A1S2Y087_CICAR	R.VLLEEQEPEQSR.G	Y	73.39	1455.72	12	4	728.868	2	38.04	39853000	1	11247	Banda_5_821.raw	1	1	331	342			PEAKS DB
12	11	A0A1S2Y087|A0A1S2Y087_CICAR	K.ELTFPGSAQEVNR.L	Y	69.25	1446.71	13	13	724.363	2	45.5	17808000	1	14746	Banda_5_821.raw	1	1	544	556			PEAKS DB
12	11	A0A1S2Y087|A0A1S2Y087_CICAR	R.QSYFANAQPQQR.E	Y	66.82	1436.68	12	9	719.348	2	32.88	2357700	1	8955	Banda_5_821.raw	1	1	563	574			PEAKS DB
12	11	A0A1S2Y087|A0A1S2Y087_CICAR	R.SNLFQNLQNYR.F	Y	65.36	1395.69	11	13	698.853	2	51.16	3723200	1	17671	Banda_5_821.raw	1	1	199	209			PEAKS DB
12	11	A0A1S2Y087|A0A1S2Y087_CICAR	K.SILEASFNTK.Y	Y	61.06	1108.58	10	-5	555.295	2	49.44	241000	1	16772	Banda_5_821.raw	1	1	315	324			PEAKS DB
12	11	A0A1S2Y087|A0A1S2Y087_CICAR	R.GSEESEEGDAIVK.V	Y	60.37	1348.6	13	8	675.308	2	29.4	18806000	1	7500	Banda_5_821.raw	1	1	346	358			PEAKS DB
12	11	A0A1S2Y087|A0A1S2Y087_CICAR	K.AILTVLNPNDR.N	N	59.13	1224.68	11	11	613.349	2	50.49	30859000	1	17370	Banda_5_821.raw	1	1	239	249			PEAKS DB
12	11	A0A1S2Y087|A0A1S2Y087_CICAR	K.SISSESEPFNLR.S	Y	58.84	1364.66	12	3	683.336	2	48.13	15066000	1	16127	Banda_5_821.raw	1	1	378	389			PEAKS DB
12	11	A0A1S2Y087|A0A1S2Y087_CICAR	R.VVELAIPVNRPGK.F	Y	53.64	1390.83	13	6	696.423	2	50.97	2364100	1	17179	Banda_5_821.raw	1	1	281	293			PEAKS DB
12	11	A0A1S2Y087|A0A1S2Y087_CICAR	K.FFEITPEK.S	N	51.35	1009.51	8	26	1010.52	1	50.08	26007000	1	16602	Banda_5_821.raw	2	2	402	409			PEAKS DB
12	11	A0A1S2Y087|A0A1S2Y087_CICAR	R.NPIYSNK.F	N	48.64	834.423	7	-1	418.219	2	29	15567000	1	7481	Banda_5_821.raw	2	2	392	398			PEAKS DB
12	11	A0A1S2Y087|A0A1S2Y087_CICAR	R.AIVVLFINEGK.G	Y	45.67	1201.71	11	7	601.861	2	53.11	556290	1	18343	Banda_5_821.raw	1	1	439	449			PEAKS DB
12	11	A0A1S2Y087|A0A1S2Y087_CICAR	R.NSFNLER.G	Y	45.47	878.425	7	1	440.22	2	37.31	32708000	1	11170	Banda_5_821.raw	2	2	250	256			PEAKS DB
12	11	A0A1S2Y087|A0A1S2Y087_CICAR	R.E(-18.01)QIEELSK.H	N	44.23	956.481	8	6	957.489	1	31.64	119020	1	8339	Banda_5_821.raw	1	1	362	369	Pyro-glu from E	E1:Pyro-glu from E:1000.00	PEAKS DB
12	11	A0A1S2Y087|A0A1S2Y087_CICAR	R.EQIEELSK.H	N	43.34	974.492	8	5	975.5	1	31.02	55492000	1	8204	Banda_5_821.raw	3	3	362	369			PEAKS DB
12	11	A0A1S2Y087|A0A1S2Y087_CICAR	K.EDEEESSSESQGR.R	Y	41.02	1467.56	13	20	734.789	2	17.83	119850	1	3117	Banda_5_821.raw	1	1	155	167			PEAKS DB
12	11	A0A1S2Y087|A0A1S2Y087_CICAR	K.SESKEDEEESSSESQGR.R	Y	40.32	1898.76	17	5	633.928	3	29.11	5175600	1	7254	Banda_5_821.raw	1	1	151	167			PEAKS DB
12	11	A0A1S2Y087|A0A1S2Y087_CICAR	R.RGSEESEEGDAIVK.V	Y	36.28	1504.7	14	0	502.574	3	48.28	9202800	1	15928	Banda_5_821.raw	1	1	345	358			PEAKS DB
16	18	A0A1S2XSB9|A0A1S2XSB9_CICAR	R.IESEGGLIETWNPNNR.Q	Y	76.21	1827.88	16	4	914.945	2	49.39	5524900	1	16761	Banda_5_821.raw	1	1	45	60			PEAKS DB
16	18	A0A1S2XSB9|A0A1S2XSB9_CICAR	R.FYLAGNQEQEFLQYQQQEGR.K	Y	68.61	2475.15	20	-1	1238.58	2	49.87	2772100	1	16775	Banda_5_821.raw	2	2	181	200			PEAKS DB
16	18	A0A1S2XSB9|A0A1S2XSB9_CICAR	R.DFLEDALNVNR.H	N	66.92	1304.64	11	14	653.326	2	52.21	9600900	1	18231	Banda_5_821.raw	1	1	218	228			PEAKS DB
16	18	A0A1S2XSB9|A0A1S2XSB9_CICAR	K.SSNPFTFLVPPR.E	Y	63.39	1360.71	12	6	681.365	2	53.48	2456200	1	18680	Banda_5_821.raw	1	1	499	510			PEAKS DB
16	18	A0A1S2XSB9|A0A1S2XSB9_CICAR	R.KEEQENEGNNIFSGFR.R	Y	61.79	1896.86	16	6	633.294	3	51.45	1492900	1	17603	Banda_5_821.raw	2	2	201	216			PEAKS DB
16	18	A0A1S2XSB9|A0A1S2XSB9_CICAR	K.GGLSFISPSEK.Q	Y	55.85	1120.58	11	-7	561.295	2	48.92	12535000	1	16159	Banda_5_821.raw	1	1	251	261			PEAKS DB
16	18	A0A1S2XSB9|A0A1S2XSB9_CICAR	K.TVTSFDLPALR.W	N	55.57	1218.66	11	-4	610.337	2	51.6	12302000	1	17504	Banda_5_821.raw	1	1	366	376			PEAKS DB
16	18	A0A1S2XSB9|A0A1S2XSB9_CICAR	K.EEQENEGNNIFSGFR.R	Y	52.69	1768.77	15	1	885.39	2	49.85	85820	1	16691	Banda_5_821.raw	1	1	202	216			PEAKS DB
16	18	A0A1S2XSB9|A0A1S2XSB9_CICAR	R.LHQNIDSSSSPDIYIPQAGR.I	Y	50.39	2197.08	20	8	733.367	3	49.85	2239700	1	16560	Banda_5_821.raw	1	1	344	363			PEAKS DB
16	18	A0A1S2XSB9|A0A1S2XSB9_CICAR	R.Q(-17.03)DEDEDEKR.R	N	44.6	1145.45	9	6	573.731	2	17.83	721380	1	3086	Banda_5_821.raw	1	1	291	299	Pyro-glu from Q	Q1:Pyro-glu from Q:1000.00	PEAKS DB
16	18	A0A1S2XSB9|A0A1S2XSB9_CICAR	R.DNGFEETIC(+57.02)TAR.L	N	39.08	1411.6	12	1	706.809	2	39.97	14687	1	12086	Banda_5_821.raw	1	1	332	343	Carbamidomethylation	C9:Carbamidomethylation:1000.00	PEAKS DB
16	18	A0A1S2XSB9|A0A1S2XSB9_CICAR	L.NALEPDNR.I	N	37.62	927.441	8	-12	464.727	2	29.1	0	1	7407	Banda_5_821.raw	0	0	37	44			PEAKS DB
16	18	A0A1S2XSB9|A0A1S2XSB9_CICAR	R.ALIVPQNFAVAAK.S	Y	36.67	1340.78	13	13	671.399	2	50.34	5596400	1	16810	Banda_5_821.raw	1	1	434	446			PEAKS DB
16	18	A0A1S2XSB9|A0A1S2XSB9_CICAR	R.FSYVAFK.T	N	36.23	860.443	7	-2	431.229	2	50.12	10293000	1	16645	Banda_5_821.raw	1	1	452	458			PEAKS DB
30	29	A0A1S2XPL0|A0A1S2XPL0_CICAR	K.ADLVNNLGTIAR.S	N	77.98	1255.69	12	1	628.852	2	48.19	10885000	1	15804	Banda_5_821.raw	1	1	88	99			PEAKS DB
30	29	A0A1S2XPL0|A0A1S2XPL0_CICAR	K.GIVDSEDLPLNISR.E	N	77.24	1526.79	14	8	764.405	2	50.23	10164000	1	17205	Banda_5_821.raw	1	1	358	371			PEAKS DB
30	29	A0A1S2XPL0|A0A1S2XPL0_CICAR	K.EGQSDIFYITGESK.K	Y	67.7	1572.73	14	1	787.373	2	48.16	171500	1	16171	Banda_5_821.raw	1	1	457	470			PEAKS DB
30	29	A0A1S2XPL0|A0A1S2XPL0_CICAR	K.AVENSPFLEK.L	N	59.31	1132.58	10	-7	567.295	2	44.83	8394600	1	14387	Banda_5_821.raw	1	1	472	481			PEAKS DB
30	29	A0A1S2XPL0|A0A1S2XPL0_CICAR	K.EDQLEYLEER.R	N	56.48	1322.6	10	9	662.307	2	45.56	6710300	1	14458	Banda_5_821.raw	1	1	180	189			PEAKS DB
30	29	A0A1S2XPL0|A0A1S2XPL0_CICAR	K.TNNTLTIIDSGIGM(+15.99)TK.A	Y	47.91	1693.86	16	2	847.935	2	48.44	1138200	1	15772	Banda_5_821.raw	1	1	72	87	Oxidation (M)	M14:Oxidation (M):1000.00	PEAKS DB
30	29	A0A1S2XPL0|A0A1S2XPL0_CICAR	K.KAVENSPFLEK.L	N	46.19	1260.67	11	14	631.344	2	50.36	1275800	1	17093	Banda_5_821.raw	1	1	471	481			PEAKS DB
30	29	A0A1S2XPL0|A0A1S2XPL0_CICAR	R.ELISNASDALDK.I	N	44.53	1274.64	12	1	638.325	2	42.39	11617000	1	13473	Banda_5_821.raw	1	1	34	45			PEAKS DB
30	29	A0A1S2XPL0|A0A1S2XPL0_CICAR	K.TNNTLTIIDSGIGMTK.A	Y	43.41	1677.86	16	5	839.938	2	50.43	396310	1	17040	Banda_5_821.raw	1	1	72	87			PEAKS DB
30	29	A0A1S2XPL0|A0A1S2XPL0_CICAR	R.APFDLFDTK.K	N	37.3	1052.52	9	7	527.266	2	52.37	2362900	1	18170	Banda_5_821.raw	1	1	318	326			PEAKS DB
30	29	A0A1S2XPL0|A0A1S2XPL0_CICAR	R.M(+15.99)KEGQSDIFYITGESK.K	Y	35.26	1847.86	16	3	616.961	3	50.74	1198600	1	17229	Banda_5_821.raw	1	1	455	470	Oxidation (M)	M1:Oxidation (M):1000.00	PEAKS DB
17	24	A0A1S2XQR4|A0A1S2XQR4_CICAR	K.ILEASFNSDYEEIER.V	N	65.63	1813.84	15	14	907.927	2	49.1	5330800	1	16404	Banda_5_821.raw	1	1	176	190			PEAKS DB
17	24	A0A1S2XQR4|A0A1S2XQR4_CICAR	R.AILTVLNPNDR.N	N	59.13	1224.68	11	11	613.349	2	50.49	30859000	1	17370	Banda_5_821.raw	1	1	99	109			PEAKS DB
17	24	A0A1S2XQR4|A0A1S2XQR4_CICAR	K.LPAGTIAYLANR.D	N	58.44	1258.7	12	3	630.359	2	50.1	3872400	1	16792	Banda_5_821.raw	1	1	122	133			PEAKS DB
17	24	A0A1S2XQR4|A0A1S2XQR4_CICAR	K.EVAFPGSAEEVDR.L	N	57.13	1404.65	13	16	703.335	2	42.75	4547600	1	13249	Banda_5_821.raw	1	1	407	419			PEAKS DB
17	24	A0A1S2XQR4|A0A1S2XQR4_CICAR	R.Q(-17.03)SHFANAQPQQK.D	N	54.89	1365.64	12	8	683.829	2	28.25	987790	1	7116	Banda_5_821.raw	1	1	426	437	Pyro-glu from Q	Q1:Pyro-glu from Q:1000.00	PEAKS DB
17	24	A0A1S2XQR4|A0A1S2XQR4_CICAR	N.FFEITPEK.N	N	51.35	1009.51	8	26	1010.52	1	50.08	26007000	1	16602	Banda_5_821.raw	2	2	266	273			PEAKS DB
17	24	A0A1S2XQR4|A0A1S2XQR4_CICAR	R.ATVILVVNEGK.G	N	48.76	1141.67	11	10	571.843	2	46.87	4015600	1	15199	Banda_5_821.raw	1	1	303	313			PEAKS DB
17	24	A0A1S2XQR4|A0A1S2XQR4_CICAR	R.NPIYSNK.Y	N	48.64	834.423	7	-1	418.219	2	29	15567000	1	7481	Banda_5_821.raw	2	2	256	262			PEAKS DB
17	24	A0A1S2XQR4|A0A1S2XQR4_CICAR	F.SLSGSENQQSYFQGFSK.K	Y	47.74	1892.85	17	-4	947.434	2	46.77	206500	1	15023	Banda_5_821.raw	1	1	158	174			PEAKS DB
17	24	A0A1S2XQR4|A0A1S2XQR4_CICAR	R.Q(-17.03)EADVIVK.I	N	45.62	883.465	8	5	884.473	1	31.85	922340	1	8420	Banda_5_821.raw	1	1	215	222	Pyro-glu from Q	Q1:Pyro-glu from Q:1000.00	PEAKS DB
17	24	A0A1S2XQR4|A0A1S2XQR4_CICAR	R.SQLFENLQNYR.L	N	44.86	1410.69	11	15	706.353	2	50.21	2325100	1	16718	Banda_5_821.raw	1	1	59	69			PEAKS DB
17	24	A0A1S2XQR4|A0A1S2XQR4_CICAR	R.E(-18.01)QIEELSK.N	N	44.23	956.481	8	6	957.489	1	31.64	119020	1	8339	Banda_5_821.raw	1	1	226	233	Pyro-glu from E	E1:Pyro-glu from E:1000.00	PEAKS DB
17	24	A0A1S2XQR4|A0A1S2XQR4_CICAR	R.EQIEELSK.N	N	43.34	974.492	8	5	975.5	1	31.02	55492000	1	8204	Banda_5_821.raw	3	3	226	233			PEAKS DB
17	24	A0A1S2XQR4|A0A1S2XQR4_CICAR	R.DDNEDLR.V	N	41.83	875.362	7	-6	438.688	2	17.93	296150	1	3104	Banda_5_821.raw	1	1	134	140			PEAKS DB
17	24	A0A1S2XQR4|A0A1S2XQR4_CICAR	R.SVSSESEPFNLR.S	N	38.59	1350.64	12	2	676.328	2	46.4	8918100	1	15158	Banda_5_821.raw	1	1	242	253			PEAKS DB
17	24	A0A1S2XQR4|A0A1S2XQR4_CICAR	K.YGNFFEITPEK.N	N	37.88	1343.64	11	13	672.828	2	51.42	2713700	1	17460	Banda_5_821.raw	1	1	263	273			PEAKS DB
18	27	A0A3Q7XNW1|A0A3Q7XNW1_CICAR	R.DFLEDALNVNR.R	N	66.92	1304.64	11	14	653.326	2	52.21	9600900	1	18231	Banda_5_821.raw	1	1	219	229			PEAKS DB
18	27	A0A3Q7XNW1|A0A3Q7XNW1_CICAR	K.SEGGLIETWNPSNK.Q	N	63.34	1530.73	14	12	766.374	2	48.73	10339000	1	16295	Banda_5_821.raw	1	1	47	60			PEAKS DB
18	27	A0A3Q7XNW1|A0A3Q7XNW1_CICAR	K.GNSVFDGELEAGR.A	N	57.05	1349.62	13	12	675.819	2	45.64	0	1	14681	Banda_5_821.raw	0	0	402	414			PEAKS DB
18	27	A0A3Q7XNW1|A0A3Q7XNW1_CICAR	K.TVTSFDLPALR.F	N	55.57	1218.66	11	-4	610.337	2	51.6	12302000	1	17504	Banda_5_821.raw	1	1	347	357			PEAKS DB
18	27	A0A3Q7XNW1|A0A3Q7XNW1_CICAR	R.LHQNIGSSSSPDIYNPQAGR.I	N	53.98	2140.03	20	-3	714.35	3	48.67	5059600	1	15978	Banda_5_821.raw	1	1	325	344			PEAKS DB
18	27	A0A3Q7XNW1|A0A3Q7XNW1_CICAR	K.FNSPFSFLVPPR.S	Y	51.14	1406.73	12	10	704.375	2	55.24	621620	1	19231	Banda_5_821.raw	1	1	480	491			PEAKS DB
18	27	A0A3Q7XNW1|A0A3Q7XNW1_CICAR	R.Q(-17.03)DEDEDEKR.Q	N	44.6	1145.45	9	6	573.731	2	17.83	721380	1	3086	Banda_5_821.raw	1	1	290	298	Pyro-glu from Q	Q1:Pyro-glu from Q:1000.00	PEAKS DB
18	27	A0A3Q7XNW1|A0A3Q7XNW1_CICAR	R.ALIVPQNFAIAAK.S	N	42.04	1354.8	13	2	678.406	2	51.19	10196000	1	17247	Banda_5_821.raw	1	1	415	427			PEAKS DB
18	27	A0A3Q7XNW1|A0A3Q7XNW1_CICAR	K.GGLSIITPPEKEPR.Q	Y	40.04	1492.82	14	-6	498.615	3	50.89	8446100	1	17192	Banda_5_821.raw	1	1	252	265			PEAKS DB
18	27	A0A3Q7XNW1|A0A3Q7XNW1_CICAR	R.DNGFEETIC(+57.02)TAR.L	N	39.08	1411.6	12	1	706.809	2	39.97	14687	1	12086	Banda_5_821.raw	1	1	313	324	Carbamidomethylation	C9:Carbamidomethylation:1000.00	PEAKS DB
18	27	A0A3Q7XNW1|A0A3Q7XNW1_CICAR	R.ATLQPNSLR.R	Y	38.69	998.551	9	-1	500.283	2	36.5	14759000	1	10385	Banda_5_821.raw	1	1	72	80			PEAKS DB
18	27	A0A3Q7XNW1|A0A3Q7XNW1_CICAR	L.NALEPDNR.I	N	37.62	927.441	8	-12	464.727	2	29.1	0	1	7407	Banda_5_821.raw	0	0	37	44			PEAKS DB
18	27	A0A3Q7XNW1|A0A3Q7XNW1_CICAR	R.FSYVAFK.T	N	36.23	860.443	7	-2	431.229	2	50.12	10293000	1	16645	Banda_5_821.raw	1	1	433	439			PEAKS DB
34	36	A0A1S2Y850|A0A1S2Y850_CICAR	K.ADLVNNLGTIAR.S	N	77.98	1255.69	12	1	628.852	2	48.19	10885000	1	15804	Banda_5_821.raw	1	1	88	99			PEAKS DB
34	36	A0A1S2Y850|A0A1S2Y850_CICAR	K.GIVDSEDLPLNISR.E	N	77.24	1526.79	14	8	764.405	2	50.23	10164000	1	17205	Banda_5_821.raw	1	1	358	371			PEAKS DB
34	36	A0A1S2Y850|A0A1S2Y850_CICAR	K.AVENSPFLEK.L	N	59.31	1132.58	10	-7	567.295	2	44.83	8394600	1	14387	Banda_5_821.raw	1	1	472	481			PEAKS DB
34	36	A0A1S2Y850|A0A1S2Y850_CICAR	K.EDQLEYLEER.R	N	56.48	1322.6	10	9	662.307	2	45.56	6710300	1	14458	Banda_5_821.raw	1	1	180	189			PEAKS DB
34	36	A0A1S2Y850|A0A1S2Y850_CICAR	K.ANNTLTIVDSGIGMTK.A	Y	49.26	1633.83	16	2	817.925	2	48.93	260670	1	16162	Banda_5_821.raw	1	1	72	87			PEAKS DB
34	36	A0A1S2Y850|A0A1S2Y850_CICAR	K.KAVENSPFLEK.L	N	46.19	1260.67	11	14	631.344	2	50.36	1275800	1	17093	Banda_5_821.raw	1	1	471	481			PEAKS DB
34	36	A0A1S2Y850|A0A1S2Y850_CICAR	R.ELISNASDALDK.I	N	44.53	1274.64	12	1	638.325	2	42.39	11617000	1	13473	Banda_5_821.raw	1	1	34	45			PEAKS DB
34	36	A0A1S2Y850|A0A1S2Y850_CICAR	R.APFDLFDTK.K	N	37.3	1052.52	9	7	527.266	2	52.37	2362900	1	18170	Banda_5_821.raw	1	1	318	326			PEAKS DB
26	31	sp|Q9SMJ4|LEG_CICAR	R.YQQEGSEEEENEGGNIFSGFK.R	Y	78.17	2377	21	0	1189.51	2	49.42	8323400	1	16568	Banda_5_821.raw	2	2	194	214			PEAKS DB
26	31	sp|Q9SMJ4|LEG_CICAR	R.DFLEDALNVNR.R	N	66.92	1304.64	11	14	653.326	2	52.21	9600900	1	18231	Banda_5_821.raw	1	1	216	226			PEAKS DB
26	31	sp|Q9SMJ4|LEG_CICAR	K.SEGGLIETWNPSNK.Q	N	63.34	1530.73	14	12	766.374	2	48.73	10339000	1	16295	Banda_5_821.raw	1	1	47	60			PEAKS DB
26	31	sp|Q9SMJ4|LEG_CICAR	K.GNSVFDGELEAGR.A	N	57.05	1349.62	13	12	675.819	2	45.64	0	1	14681	Banda_5_821.raw	0	0	400	412			PEAKS DB
26	31	sp|Q9SMJ4|LEG_CICAR	R.LHQNIGSSSSPDIYNPQAGR.I	N	53.98	2140.03	20	-3	714.35	3	48.67	5059600	1	15978	Banda_5_821.raw	1	1	322	341			PEAKS DB
26	31	sp|Q9SMJ4|LEG_CICAR	R.Q(-17.03)DEDEDEKR.Q	N	44.6	1145.45	9	6	573.731	2	17.83	721380	1	3086	Banda_5_821.raw	1	1	287	295	Pyro-glu from Q	Q1:Pyro-glu from Q:1000.00	PEAKS DB
26	31	sp|Q9SMJ4|LEG_CICAR	R.ALIVPQNFAIAAK.S	N	42.04	1354.8	13	2	678.406	2	51.19	10196000	1	17247	Banda_5_821.raw	1	1	413	425			PEAKS DB
26	31	sp|Q9SMJ4|LEG_CICAR	R.DNGFEETIC(+57.02)TAR.L	N	39.08	1411.6	12	1	706.809	2	39.97	14687	1	12086	Banda_5_821.raw	1	1	310	321	Carbamidomethylation	C9:Carbamidomethylation:1000.00	PEAKS DB
26	31	sp|Q9SMJ4|LEG_CICAR	R.FSYVAFK.T	N	36.23	860.443	7	-2	431.229	2	50.12	10293000	1	16645	Banda_5_821.raw	1	1	431	437			PEAKS DB
31	25	A0A1S2X989|A0A1S2X989_CICAR	K.FDIDANGILSVAAIDK.G	Y	72.6	1660.87	16	14	831.442	2	53.39	382580	1	18492	Banda_5_821.raw	1	1	538	553			PEAKS DB
31	25	A0A1S2X989|A0A1S2X989_CICAR	R.Q(-17.03)AVVNPENTFFSVK.R	Y	64.63	1561.78	14	19	781.898	2	49.11	139600	1	16344	Banda_5_821.raw	1	1	124	137	Pyro-glu from Q	Q1:Pyro-glu from Q:1000.00	PEAKS DB
31	25	A0A1S2X989|A0A1S2X989_CICAR	K.SFAAEEISAQVLR.K	Y	61.5	1419.74	13	3	710.875	2	51.19	3389700	1	17244	Banda_5_821.raw	1	1	176	188			PEAKS DB
31	25	A0A1S2X989|A0A1S2X989_CICAR	R.IINEPTAASLAYGFER.K	Y	59.21	1750.89	16	17	876.453	2	50.94	2920900	1	17079	Banda_5_821.raw	1	1	235	250			PEAKS DB
31	25	A0A1S2X989|A0A1S2X989_CICAR	R.QAVVNPENTFFSVK.R	Y	53.17	1578.8	14	11	790.41	2	50.66	2311400	1	16958	Banda_5_821.raw	1	1	124	137			PEAKS DB
31	25	A0A1S2X989|A0A1S2X989_CICAR	K.AVVTVPAYFNDSQR.T	N	52.99	1565.78	14	14	783.9	2	48.55	3974200	1	16169	Banda_5_821.raw	1	1	205	218			PEAKS DB
31	25	A0A1S2X989|A0A1S2X989_CICAR	R.IPAVQELVK.K	Y	49.2	995.601	9	-1	498.808	2	48.65	5373800	1	16178	Banda_5_821.raw	1	1	408	416			PEAKS DB
31	25	A0A1S2X989|A0A1S2X989_CICAR	R.IAGLEVLR.I	Y	45.82	869.533	8	-7	435.774	2	50.81	254900	1	17266	Banda_5_821.raw	1	1	227	234			PEAKS DB
31	25	A0A1S2X989|A0A1S2X989_CICAR	K.DAISGGSTQTIK.D	Y	45.35	1176.6	12	6	589.307	2	28.64	1911900	1	7340	Banda_5_821.raw	1	1	636	647			PEAKS DB
31	25	A0A1S2X989|A0A1S2X989_CICAR	K.W(sub A)VVTVPAYFNDSQR.T	Y	39.3	1680.83	14	-75	841.414	2	44.89	5115500	1	14289	Banda_5_821.raw	1	1	205	218			SPIDER
31	25	A0A1S2X989|A0A1S2X989_CICAR	R.LDGIPPAPR.G	Y	38.1	934.524	9	-5	468.269	2	40.08	3092900	1	12101	Banda_5_821.raw	1	1	521	529			PEAKS DB
31	25	A0A1S2X989|A0A1S2X989_CICAR	K.TPVENSLR.D	Y	37.79	914.482	8	4	458.248	2	31.41	4222900	1	8532	Banda_5_821.raw	1	1	380	387			PEAKS DB
19	26	A0A1S2XQ88|A0A1S2XQ88_CICAR	K.ILEASFNSDYEEIER.V	N	65.63	1813.84	15	14	907.927	2	49.1	5330800	1	16404	Banda_5_821.raw	1	1	176	190			PEAKS DB
19	26	A0A1S2XQ88|A0A1S2XQ88_CICAR	R.AILTVLNPNDR.N	N	59.13	1224.68	11	11	613.349	2	50.49	30859000	1	17370	Banda_5_821.raw	1	1	99	109			PEAKS DB
19	26	A0A1S2XQ88|A0A1S2XQ88_CICAR	K.LPAGTIAYLANR.D	N	58.44	1258.7	12	3	630.359	2	50.1	3872400	1	16792	Banda_5_821.raw	1	1	122	133			PEAKS DB
19	26	A0A1S2XQ88|A0A1S2XQ88_CICAR	K.EVAFPGSAEEVDR.L	N	57.13	1404.65	13	16	703.335	2	42.75	4547600	1	13249	Banda_5_821.raw	1	1	405	417			PEAKS DB
19	26	A0A1S2XQ88|A0A1S2XQ88_CICAR	R.Q(-17.03)SHFANAQPQQK.R	N	54.89	1365.64	12	8	683.829	2	28.25	987790	1	7116	Banda_5_821.raw	1	1	424	435	Pyro-glu from Q	Q1:Pyro-glu from Q:1000.00	PEAKS DB
19	26	A0A1S2XQ88|A0A1S2XQ88_CICAR	N.FFEITPEK.N	N	51.35	1009.51	8	26	1010.52	1	50.08	26007000	1	16602	Banda_5_821.raw	2	2	264	271			PEAKS DB
19	26	A0A1S2XQ88|A0A1S2XQ88_CICAR	R.ATVILVVNEGK.G	N	48.76	1141.67	11	10	571.843	2	46.87	4015600	1	15199	Banda_5_821.raw	1	1	301	311			PEAKS DB
19	26	A0A1S2XQ88|A0A1S2XQ88_CICAR	R.SQLFENLQNYR.L	N	44.86	1410.69	11	15	706.353	2	50.21	2325100	1	16718	Banda_5_821.raw	1	1	59	69			PEAKS DB
19	26	A0A1S2XQ88|A0A1S2XQ88_CICAR	R.E(-18.01)QIEELSK.N	N	44.23	956.481	8	6	957.489	1	31.64	119020	1	8339	Banda_5_821.raw	1	1	224	231	Pyro-glu from E	E1:Pyro-glu from E:1000.00	PEAKS DB
19	26	A0A1S2XQ88|A0A1S2XQ88_CICAR	R.EQIEELSK.N	N	43.34	974.492	8	5	975.5	1	31.02	55492000	1	8204	Banda_5_821.raw	3	3	224	231			PEAKS DB
19	26	A0A1S2XQ88|A0A1S2XQ88_CICAR	R.DDNEDLR.V	N	41.83	875.362	7	-6	438.688	2	17.93	296150	1	3104	Banda_5_821.raw	1	1	134	140			PEAKS DB
19	26	A0A1S2XQ88|A0A1S2XQ88_CICAR	R.VLLEEQEQKPEQR.R	Y	40.05	1624.84	13	1	542.621	3	49.19	1644100	1	16426	Banda_5_821.raw	1	1	191	203			PEAKS DB
19	26	A0A1S2XQ88|A0A1S2XQ88_CICAR	R.QQSQETDVIVK.I	Y	38.9	1273.65	11	12	637.834	2	30.31	1025200	1	8084	Banda_5_821.raw	1	1	210	220			PEAKS DB
19	26	A0A1S2XQ88|A0A1S2XQ88_CICAR	K.SVSSESEPFNLR.S	N	38.59	1350.64	12	2	676.328	2	46.4	8918100	1	15158	Banda_5_821.raw	1	1	240	251			PEAKS DB
21	33	A0A1S2XYZ0|A0A1S2XYZ0_CICAR	R.IVDLAIPINTPAK.F	Y	69.86	1363.81	13	5	682.911	2	50.38	5646200	1	16870	Banda_5_821.raw	1	1	266	278			PEAKS DB
21	33	A0A1S2XYZ0|A0A1S2XYZ0_CICAR	K.ELAFPGSAQEVDR.L	Y	63.5	1417.68	13	3	709.849	2	46.63	2192800	1	15258	Banda_5_821.raw	1	1	514	526			PEAKS DB
21	33	A0A1S2XYZ0|A0A1S2XYZ0_CICAR	K.LPAGTIAYLANR.D	N	58.44	1258.7	12	3	630.359	2	50.1	3872400	1	16792	Banda_5_821.raw	1	1	247	258			PEAKS DB
21	33	A0A1S2XYZ0|A0A1S2XYZ0_CICAR	R.ILLEEPQQR.R	Y	47.2	1124.62	9	3	563.317	2	44.57	6078100	1	14275	Banda_5_821.raw	1	1	316	324			PEAKS DB
21	33	A0A1S2XYZ0|A0A1S2XYZ0_CICAR	R.E(-18.01)EEEETSSESQGR.R	Y	44.52	1477.58	13	6	739.798	2	18.08	16935	1	3189	Banda_5_821.raw	1	1	140	152	Pyro-glu from E	E1:Pyro-glu from E:1000.00	PEAKS DB
21	33	A0A1S2XYZ0|A0A1S2XYZ0_CICAR	K.SISSESEPFNLK.R	Y	44.27	1336.65	12	13	669.334	2	47.02	1470500	1	15242	Banda_5_821.raw	1	1	361	372			PEAKS DB
21	33	A0A1S2XYZ0|A0A1S2XYZ0_CICAR	R.E(-18.01)QIEELSK.H	N	44.23	956.481	8	6	957.489	1	31.64	119020	1	8339	Banda_5_821.raw	1	1	345	352	Pyro-glu from E	E1:Pyro-glu from E:1000.00	PEAKS DB
21	33	A0A1S2XYZ0|A0A1S2XYZ0_CICAR	R.ATM(+15.99)VVVVNEGK.G	Y	44.15	1161.61	11	-4	581.81	2	30.04	1113800	1	7819	Banda_5_821.raw	1	1	422	432	Oxidation (M)	M3:Oxidation (M):1000.00	PEAKS DB
21	33	A0A1S2XYZ0|A0A1S2XYZ0_CICAR	K.GNFELVGLR.N	Y	43.93	1003.54	9	8	502.78	2	50.83	0	1	17276	Banda_5_821.raw	0	0	433	441			PEAKS DB
21	33	A0A1S2XYZ0|A0A1S2XYZ0_CICAR	R.EQIEELSK.H	N	43.34	974.492	8	5	975.5	1	31.02	55492000	1	8204	Banda_5_821.raw	3	3	345	352			PEAKS DB
21	33	A0A1S2XYZ0|A0A1S2XYZ0_CICAR	R.Q(-17.03)QSQEAEVIVK.V	Y	38.69	1240.63	11	11	621.323	2	30.73	2333500	1	8118	Banda_5_821.raw	1	1	331	341	Pyro-glu from Q	Q1:Pyro-glu from Q:1000.00	PEAKS DB
33	34	A0A1S2YLD1|A0A1S2YLD1_CICAR	K.ALPTYTPETPADATR.I	N	71.63	1602.79	15	10	802.403	2	39.87	6911100	1	11984	Banda_5_821.raw	1	1	414	428			PEAKS DB
33	34	A0A1S2YLD1|A0A1S2YLD1_CICAR	K.VTTTIGYGSPNK.S	Y	66.4	1236.63	12	-9	619.324	2	32.68	3326100	1	9114	Banda_5_821.raw	1	1	316	327			PEAKS DB
33	34	A0A1S2YLD1|A0A1S2YLD1_CICAR	K.NGNTGYDEIR.A	N	56.29	1137.51	10	-2	569.76	2	31.8	1368400	1	8735	Banda_5_821.raw	1	1	289	298			PEAKS DB
33	34	A0A1S2YLD1|A0A1S2YLD1_CICAR	K.ESVLPAAVSAR.V	Y	50.54	1098.6	11	12	550.31	2	43.73	1525400	1	13726	Banda_5_821.raw	1	1	670	680			PEAKS DB
33	34	A0A1S2YLD1|A0A1S2YLD1_CICAR	S.SAVVTQTSENSTADLSLVEK.S	Y	49.79	2078.04	20	2	1040.03	2	42.64	526290	1	13171	Banda_5_821.raw	1	1	58	77			PEAKS DB
33	34	A0A1S2YLD1|A0A1S2YLD1_CICAR	R.ILSQQNLNALAK.V	Y	47.04	1311.75	12	6	656.883	2	44.97	2662800	1	14366	Banda_5_821.raw	1	1	429	440			PEAKS DB
33	34	A0A1S2YLD1|A0A1S2YLD1_CICAR	K.TFGDFQSDSPGER.N	Y	43.75	1441.61	13	21	721.814	2	43.34	400500	1	13674	Banda_5_821.raw	2	2	462	474			PEAKS DB
33	34	A0A1S2YLD1|A0A1S2YLD1_CICAR	R.VSIEAGSTFGWHK.I	N	41.98	1417.7	13	1	473.574	3	51.13	410870	1	17328	Banda_5_821.raw	1	1	681	693			PEAKS DB
33	34	A0A1S2YLD1|A0A1S2YLD1_CICAR	K.SIISGDLPSGWEK.A	Y	41.7	1387.7	13	-12	694.856	2	50.52	967770	1	17003	Banda_5_821.raw	1	1	401	413			PEAKS DB
33	34	A0A1S2YLD1|A0A1S2YLD1_CICAR	R.FLAIDSVEK.A	Y	35.77	1020.55	9	14	511.283	2	49.43	2199600	1	16532	Banda_5_821.raw	1	1	84	92			PEAKS DB
29	30	A0A1S2YUQ3|A0A1S2YUQ3_CICAR	K.VLELESTSVK.A	Y	65.67	1103.61	10	5	552.811	2	43.64	1203000	1	13629	Banda_5_821.raw	1	1	479	488			PEAKS DB
29	30	A0A1S2YUQ3|A0A1S2YUQ3_CICAR	K.TDEEQVIDGLDR.A	Y	60.85	1388.64	12	9	695.329	2	42.87	5706100	1	13264	Banda_5_821.raw	1	1	327	338			PEAKS DB
29	30	A0A1S2YUQ3|A0A1S2YUQ3_CICAR	K.DGHFC(+57.02)PALSK.A	Y	59.03	1130.52	10	12	566.267	2	48.84	553070	1	16244	Banda_5_821.raw	1	1	205	214	Carbamidomethylation	C5:Carbamidomethylation:1000.00	PEAKS DB
29	30	A0A1S2YUQ3|A0A1S2YUQ3_CICAR	K.ALEIDPDNR.D	Y	56.01	1041.51	9	3	521.762	2	38.31	6746400	1	11139	Banda_5_821.raw	1	1	513	521			PEAKS DB
29	30	A0A1S2YUQ3|A0A1S2YUQ3_CICAR	K.FTLGQGQVIK.G	Y	53.01	1089.62	10	2	545.817	2	48.13	7821900	1	15918	Banda_5_821.raw	1	1	89	98			PEAKS DB
29	30	A0A1S2YUQ3|A0A1S2YUQ3_CICAR	K.YIEYDTSFSEEQK.K	Y	50.1	1637.71	13	-3	819.862	2	40.56	1752400	1	12469	Banda_5_821.raw	2	2	433	445			PEAKS DB
29	30	A0A1S2YUQ3|A0A1S2YUQ3_CICAR	K.VILTVKPQYGFGEK.G	Y	49.68	1577.88	14	1	526.968	3	51.55	6069100	1	17447	Banda_5_821.raw	2	2	225	238			PEAKS DB
29	30	A0A1S2YUQ3|A0A1S2YUQ3_CICAR	K.SDGVEFAVK.D	Y	41.34	950.471	9	0	476.243	2	42.01	9357900	1	12918	Banda_5_821.raw	1	1	196	204			PEAKS DB
29	30	A0A1S2YUQ3|A0A1S2YUQ3_CICAR	K.LQDGTVFLK.K	Y	39.95	1019.57	9	2	510.79	2	48.74	8065700	1	16082	Banda_5_821.raw	1	1	304	312			PEAKS DB
29	30	A0A1S2YUQ3|A0A1S2YUQ3_CICAR	K.DAEPM(+15.99)SIDSK.A	Y	36.12	1107.48	10	1	554.745	2	25.18	1392400	1	5477	Banda_5_821.raw	1	1	567	576	Oxidation (M)	M5:Oxidation (M):1000.00	PEAKS DB
39	51	A0A3Q7YF59|A0A3Q7YF59_CICAR	R.Q(-17.03)KLPNLPGTSIEGVEK.G	Y	79.87	1691.91	16	15	846.963	2	47.71	1239200	1	15400	Banda_5_821.raw	1	1	597	612	Pyro-glu from Q	Q1:Pyro-glu from Q:1000.00	PEAKS DB
39	51	A0A3Q7YF59|A0A3Q7YF59_CICAR	K.ALPTYTPETPADATR.N	N	71.63	1602.79	15	10	802.403	2	39.87	6911100	1	11984	Banda_5_821.raw	1	1	418	432			PEAKS DB
39	51	A0A3Q7YF59|A0A3Q7YF59_CICAR	K.NGNTGYDEIR.A	N	56.29	1137.51	10	-2	569.76	2	31.8	1368400	1	8735	Banda_5_821.raw	1	1	293	302			PEAKS DB
39	51	A0A3Q7YF59|A0A3Q7YF59_CICAR	R.VSIEAGSTFGWHK.I	N	41.98	1417.7	13	1	473.574	3	51.13	410870	1	17328	Banda_5_821.raw	1	1	685	697			PEAKS DB
39	51	A0A3Q7YF59|A0A3Q7YF59_CICAR	K.YAEEAAELK.A	Y	39.25	1022.49	9	-9	512.253	2	33.25	1773800	1	9210	Banda_5_821.raw	1	1	396	404			PEAKS DB
39	51	A0A3Q7YF59|A0A3Q7YF59_CICAR	K.LPNLPGTSIEGVEK.G	Y	34.89	1452.78	14	0	727.398	2	48.41	811720	1	15979	Banda_5_821.raw	1	1	599	612			PEAKS DB
39	51	A0A3Q7YF59|A0A3Q7YF59_CICAR	R.NLSQQNLNALAK.V	Y	34.49	1312.71	12	10	657.363	2	41.53	3996800	1	12728	Banda_5_821.raw	1	1	433	444			PEAKS DB
20	39	A0A1S2XBN2|A0A1S2XBN2_CICAR	M(+42.01)FSGVTGLLNR.G	N	61.88	1235.63	11	8	618.824	2	56.33	447920	1	19780	Banda_5_821.raw	1	1	1	11	Acetylation (Protein N-term)	M1:Acetylation (Protein N-term):1000.00	PEAKS DB
20	39	A0A1S2XBN2|A0A1S2XBN2_CICAR	R.DTM(+15.99)NINALAR.Q	N	58.68	1133.55	10	-9	567.782	2	33.86	15755000	1	9568	Banda_5_821.raw	1	1	557	566	Oxidation (M)	M3:Oxidation (M):1000.00	PEAKS DB
20	39	A0A1S2XBN2|A0A1S2XBN2_CICAR	M(+15.99)(+42.01)FSGVTGLLNR.G	N	54.43	1251.63	11	3	626.822	2	48.53	229300	1	15856	Banda_5_821.raw	1	1	1	11	Oxidation (M); Acetylation (Protein N-term)	M1:Oxidation (M):1000.00;M1:Acetylation (Protein N-term):1000.00	PEAKS DB
20	39	A0A1S2XBN2|A0A1S2XBN2_CICAR	R.TDGEQVLK.Y	N	51.28	888.455	8	-4	445.235	2	29.45	24039000	1	7465	Banda_5_821.raw	1	1	341	348			PEAKS DB
20	39	A0A1S2XBN2|A0A1S2XBN2_CICAR	R.TILFFSDDK.T	Y	50.4	1084.54	9	5	543.28	2	52.42	4693700	1	17949	Banda_5_821.raw	1	1	456	464			PEAKS DB
20	39	A0A1S2XBN2|A0A1S2XBN2_CICAR	R.SVSLQLISATK.S	N	45.42	1145.67	11	-4	573.84	2	49.44	10583000	1	16746	Banda_5_821.raw	1	1	60	70			PEAKS DB
20	39	A0A1S2XBN2|A0A1S2XBN2_CICAR	K.DWVFTEQALPNDLVK.R	Y	44.98	1773.89	15	22	887.956	2	52.99	2899900	1	18155	Banda_5_821.raw	1	1	596	610			PEAKS DB
20	39	A0A1S2XBN2|A0A1S2XBN2_CICAR	R.DTMNINALAR.Q	N	44.76	1117.55	10	1	559.785	2	44.16	3684100	1	13852	Banda_5_821.raw	1	1	557	566			PEAKS DB
20	39	A0A1S2XBN2|A0A1S2XBN2_CICAR	R.SDFVYLPR.D	N	44.73	995.508	8	3	498.761	2	50.1	7342800	1	16740	Banda_5_821.raw	2	2	256	263			PEAKS DB
20	39	A0A1S2XBN2|A0A1S2XBN2_CICAR	K.EHLEPNLEGLTVEEAIQNK.K	Y	41.4	2162.09	19	13	721.703	3	51.78	2116800	1	18144	Banda_5_821.raw	1	1	408	426			PEAKS DB
20	39	A0A1S2XBN2|A0A1S2XBN2_CICAR	K.LPTDIISK.I	N	39.55	885.517	8	-6	443.766	2	43.87	11436000	1	14051	Banda_5_821.raw	1	1	321	328			PEAKS DB
20	39	A0A1S2XBN2|A0A1S2XBN2_CICAR	R.GM(+15.99)ASWDSASPHGVK.L	Y	38.15	1444.64	14	-2	482.554	3	48.8	1106700	1	16161	Banda_5_821.raw	1	1	612	625	Oxidation (M)	M2:Oxidation (M):1000.00	PEAKS DB
35	38	A0A1S2YD12|A0A1S2YD12_CICAR	K.AEEEAATESDGGIAGFQK.K	Y	67.58	1808.81	18	17	905.412	2	36.29	1645200	1	10545	Banda_5_821.raw	1	1	423	440			PEAKS DB
35	38	A0A1S2YD12|A0A1S2YD12_CICAR	K.DGTVVLQFETR.L	Y	60.28	1263.65	11	0	632.83	2	47.87	5017800	1	15846	Banda_5_821.raw	1	1	100	110			PEAKS DB
35	38	A0A1S2YD12|A0A1S2YD12_CICAR	K.WSAPYIDNPNYK.G	Y	52.94	1466.68	12	11	734.35	2	48.03	2936800	1	15929	Banda_5_821.raw	1	1	339	350			PEAKS DB
35	38	A0A1S2YD12|A0A1S2YD12_CICAR	K.ANLLSSEDFEPSLIPSK.T	Y	48.68	1845.94	17	14	923.977	2	51.39	3205200	1	17368	Banda_5_821.raw	1	1	214	230			PEAKS DB
35	38	A0A1S2YD12|A0A1S2YD12_CICAR	R.ILIDGEEK.K	Y	43.3	915.491	8	0	458.753	2	38.52	6921900	1	11585	Banda_5_821.raw	1	1	204	211			PEAKS DB
35	38	A0A1S2YD12|A0A1S2YD12_CICAR	K.DSGENEDNKDKEETSNPPR.R	Y	42.71	2159.92	19	18	720.982	3	48.02	648430	1	15681	Banda_5_821.raw	1	1	520	538			PEAKS DB
35	38	A0A1S2YD12|A0A1S2YD12_CICAR	K.ELDESVSLK.D	Y	40.94	1018.52	9	-10	510.266	2	38.01	6997200	1	11116	Banda_5_821.raw	1	1	91	99			PEAKS DB
35	38	A0A1S2YD12|A0A1S2YD12_CICAR	K.GFDNESPYSIMFGPDR.C	Y	38.47	1830.79	16	0	916.401	2	52.93	253030	1	18265	Banda_5_821.raw	1	1	136	151			PEAKS DB
35	38	A0A1S2YD12|A0A1S2YD12_CICAR	K.Q(-17.03)KAEEEAATESDGGIAGFQK.K	Y	35.18	2047.93	20	-10	1024.97	2	38.93	1168300	1	11755	Banda_5_821.raw	1	1	421	440	Pyro-glu from Q	Q1:Pyro-glu from Q:1000.00	PEAKS DB
35	38	A0A1S2YD12|A0A1S2YD12_CICAR	A.SDDAEDAIFYESFDEDFEGR.W	Y	34.64	2355.93	20	0	1178.97	2	52.93	1091900	1	18183	Banda_5_821.raw	1	1	32	51			PEAKS DB
37	43	A0A1S3E758|A0A1S3E758_CICAR	R.YASAGGGPANASQEFK.Q	Y	70.07	1553.71	16	12	777.864	2	33.51	3382600	1	9083	Banda_5_821.raw	1	1	245	260			PEAKS DB
37	43	A0A1S3E758|A0A1S3E758_CICAR	R.AFTNDESSGLDNNIR.G	Y	66.68	1651.74	15	20	826.881	2	39.35	2604600	1	11795	Banda_5_821.raw	1	1	169	183			PEAKS DB
37	43	A0A1S3E758|A0A1S3E758_CICAR	R.GTDGSPLNAPPLIR.A	Y	66.6	1406.75	14	8	704.384	2	48.53	3520500	1	15903	Banda_5_821.raw	1	1	360	373			PEAKS DB
37	43	A0A1S3E758|A0A1S3E758_CICAR	K.TYSIAPYSSILLEAK.F	Y	44.95	1654.88	15	15	828.449	2	52.63	1679800	1	18053	Banda_5_821.raw	1	1	673	687			PEAKS DB
37	43	A0A1S3E758|A0A1S3E758_CICAR	K.SPDDFVLDGVPK.V	Y	40.71	1287.63	12	6	644.825	2	49.44	2962400	1	16773	Banda_5_821.raw	1	1	658	669			PEAKS DB
37	43	A0A1S3E758|A0A1S3E758_CICAR	R.GSYLGVIEK.I	Y	37.79	964.523	9	0	483.269	2	47.89	2471600	1	15556	Banda_5_821.raw	1	1	184	192			PEAKS DB
37	43	A0A1S3E758|A0A1S3E758_CICAR	R.DLVSYNFK.H	Y	34.26	984.492	8	-6	493.253	2	47.33	367200	1	15310	Banda_5_821.raw	1	1	468	475			PEAKS DB
37	45	A0A1S2Y9Y4|A0A1S2Y9Y4_CICAR	R.YASAGGGPANASQEFK.Q	Y	70.07	1553.71	16	12	777.864	2	33.51	3382600	1	9083	Banda_5_821.raw	1	1	337	352			PEAKS DB
37	45	A0A1S2Y9Y4|A0A1S2Y9Y4_CICAR	R.AFTNDESSGLDNNIR.G	Y	66.68	1651.74	15	20	826.881	2	39.35	2604600	1	11795	Banda_5_821.raw	1	1	261	275			PEAKS DB
37	45	A0A1S2Y9Y4|A0A1S2Y9Y4_CICAR	R.GTDGSPLNAPPLIR.A	Y	66.6	1406.75	14	8	704.384	2	48.53	3520500	1	15903	Banda_5_821.raw	1	1	452	465			PEAKS DB
37	45	A0A1S2Y9Y4|A0A1S2Y9Y4_CICAR	K.TYSIAPYSSILLEAK.F	Y	44.95	1654.88	15	15	828.449	2	52.63	1679800	1	18053	Banda_5_821.raw	1	1	765	779			PEAKS DB
37	45	A0A1S2Y9Y4|A0A1S2Y9Y4_CICAR	K.SPDDFVLDGVPK.V	Y	40.71	1287.63	12	6	644.825	2	49.44	2962400	1	16773	Banda_5_821.raw	1	1	750	761			PEAKS DB
37	45	A0A1S2Y9Y4|A0A1S2Y9Y4_CICAR	R.GSYLGVIEK.I	Y	37.79	964.523	9	0	483.269	2	47.89	2471600	1	15556	Banda_5_821.raw	1	1	276	284			PEAKS DB
37	45	A0A1S2Y9Y4|A0A1S2Y9Y4_CICAR	R.DLVSYNFK.H	Y	34.26	984.492	8	-6	493.253	2	47.33	367200	1	15310	Banda_5_821.raw	1	1	560	567			PEAKS DB
27	41	A0A1S2Y5E7|A0A1S2Y5E7_CICAR	R.FPSLVAPIK.C	Y	62.77	970.585	9	-7	486.3	2	51.55	3506600	1	17576	Banda_5_821.raw	1	1	600	608			PEAKS DB
27	41	A0A1S2Y5E7|A0A1S2Y5E7_CICAR	K.LPFAAAQIGQAFR.N	Y	62.63	1388.76	13	16	695.386	2	52.63	932440	1	18021	Banda_5_821.raw	1	1	307	319			PEAKS DB
27	41	A0A1S2Y5E7|A0A1S2Y5E7_CICAR	K.AGDEQLNVFR.F	Y	50.74	1147.56	10	-1	574.788	2	47.09	3322800	1	15144	Banda_5_821.raw	1	1	590	599			PEAKS DB
27	41	A0A1S2Y5E7|A0A1S2Y5E7_CICAR	K.DLTLSSDK.A	Y	47.01	877.439	8	3	439.727	2	32.38	2186100	1	8953	Banda_5_821.raw	1	1	216	223			PEAKS DB
27	41	A0A1S2Y5E7|A0A1S2Y5E7_CICAR	K.SLTAAGISHK.V	Y	44.42	983.54	10	14	492.778	2	48.85	1342500	1	16160	Banda_5_821.raw	1	1	630	639			PEAKS DB
27	41	A0A1S2Y5E7|A0A1S2Y5E7_CICAR	R.QSVVNTLER.R	Y	43.87	1044.56	9	7	523.286	2	40.62	2254100	1	12204	Banda_5_821.raw	1	1	109	117			PEAKS DB
27	41	A0A1S2Y5E7|A0A1S2Y5E7_CICAR	K.GIVNNETLGYFIGR.V	Y	38.62	1551.8	14	7	776.91	2	52.82	393120	1	18198	Banda_5_821.raw	1	1	387	400			PEAKS DB
27	41	A0A1S2Y5E7|A0A1S2Y5E7_CICAR	K.VDITGTSIGK.R	Y	37.24	989.539	10	10	495.777	2	36.58	3660400	1	10343	Banda_5_821.raw	1	1	640	649			PEAKS DB
27	41	A0A1S2Y5E7|A0A1S2Y5E7_CICAR	R.E(-18.01)EQVSGQSAK.K	Y	36.68	1043.49	10	2	522.751	2	18.01	11373	1	3156	Banda_5_821.raw	1	1	367	376	Pyro-glu from E	E1:Pyro-glu from E:1000.00	PEAKS DB
27	41	A0A1S2Y5E7|A0A1S2Y5E7_CICAR	R.VFTPSVIEPSFGIGR.I	Y	35.16	1604.86	15	14	803.437	2	52.48	2861800	1	18381	Banda_5_821.raw	1	1	559	573			PEAKS DB
22	50	Q304D4|Q304D4_CICAR	K.EVAFPGSAEEVDR.L	N	57.13	1404.65	13	16	703.335	2	42.75	4547600	1	13249	Banda_5_821.raw	1	1	405	417			PEAKS DB
22	50	Q304D4|Q304D4_CICAR	R.Q(-17.03)SHFANAQPQQK.D	N	54.89	1365.64	12	8	683.829	2	28.25	987790	1	7116	Banda_5_821.raw	1	1	424	435	Pyro-glu from Q	Q1:Pyro-glu from Q:1000.00	PEAKS DB
22	50	Q304D4|Q304D4_CICAR	N.FFEITPEK.N	N	51.35	1009.51	8	26	1010.52	1	50.08	26007000	1	16602	Banda_5_821.raw	2	2	264	271			PEAKS DB
22	50	Q304D4|Q304D4_CICAR	R.ATVILVVNEGK.G	N	48.76	1141.67	11	10	571.843	2	46.87	4015600	1	15199	Banda_5_821.raw	1	1	301	311			PEAKS DB
22	50	Q304D4|Q304D4_CICAR	R.NPIYSNK.Y	N	48.64	834.423	7	-1	418.219	2	29	15567000	1	7481	Banda_5_821.raw	2	2	254	260			PEAKS DB
22	50	Q304D4|Q304D4_CICAR	Q.Q(-17.03)EADVIVK.I	N	45.62	883.465	8	5	884.473	1	31.85	922340	1	8420	Banda_5_821.raw	1	1	213	220	Pyro-glu from Q	Q1:Pyro-glu from Q:1000.00	PEAKS DB
22	50	Q304D4|Q304D4_CICAR	R.E(-18.01)QIEELSK.N	N	44.23	956.481	8	6	957.489	1	31.64	119020	1	8339	Banda_5_821.raw	1	1	224	231	Pyro-glu from E	E1:Pyro-glu from E:1000.00	PEAKS DB
22	50	Q304D4|Q304D4_CICAR	R.EQIEELSK.N	N	43.34	974.492	8	5	975.5	1	31.02	55492000	1	8204	Banda_5_821.raw	3	3	224	231			PEAKS DB
22	50	Q304D4|Q304D4_CICAR	K.SVSSESEPFNLR.S	N	38.59	1350.64	12	2	676.328	2	46.4	8918100	1	15158	Banda_5_821.raw	1	1	240	251			PEAKS DB
22	50	Q304D4|Q304D4_CICAR	K.YGNFFEITPEK.N	N	37.88	1343.64	11	13	672.828	2	51.42	2713700	1	17460	Banda_5_821.raw	1	1	261	271			PEAKS DB
22	50	Q304D4|Q304D4_CICAR	R.Q(-17.03)QSQSQSQQEADVIVK.I	Y	34.92	1784.85	16	1	893.434	2	29.76	1222600	1	7611	Banda_5_821.raw	1	1	205	220	Pyro-glu from Q	Q1:Pyro-glu from Q:1000.00	PEAKS DB
36	48	A0A1S2XV08|A0A1S2XV08_CICAR	R.Q(-17.03)LEENLLLFDLVESK.L	Y	70.01	1771.92	15	7	886.97	2	61.94	1183200	1	22069	Banda_5_821.raw	1	1	402	416	Pyro-glu from Q	Q1:Pyro-glu from Q:1000.00	PEAKS DB
36	48	A0A1S2XV08|A0A1S2XV08_CICAR	R.ISGENLM(+15.99)VEAK.S	Y	59.17	1205.6	11	5	603.806	2	34.27	3734800	1	9700	Banda_5_821.raw	1	1	367	377	Oxidation (M)	M7:Oxidation (M):1000.00	PEAKS DB
36	48	A0A1S2XV08|A0A1S2XV08_CICAR	R.TPLM(+15.99)QLPVLIDLNGK.H	Y	53.91	1666.93	15	9	834.474	2	53.22	0	1	18449	Banda_5_821.raw	0	0	64	78	Oxidation (M)	M4:Oxidation (M):1000.00	PEAKS DB
36	48	A0A1S2XV08|A0A1S2XV08_CICAR	K.LGFSNSLSSR.G	Y	49	1066.54	10	1	534.278	2	46.88	3386900	1	15476	Banda_5_821.raw	1	1	417	426			PEAKS DB
36	48	A0A1S2XV08|A0A1S2XV08_CICAR	R.QLEENLLLFDLVESK.L	Y	45.83	1788.95	15	6	895.483	2	61.94	110970	1	22090	Banda_5_821.raw	1	1	402	416			PEAKS DB
36	48	A0A1S2XV08|A0A1S2XV08_CICAR	K.NNPNILNNLIYTPLTITPEGEYR.M	Y	42.44	2658.37	23	-5	1330.19	2	54.74	1590700	1	19064	Banda_5_821.raw	2	2	246	268			PEAKS DB
36	48	A0A1S2XV08|A0A1S2XV08_CICAR	K.EAQVNAVGPFGLC(+57.02)FDSK.R	Y	38.87	1837.87	17	-8	919.94	2	51.6	724040	1	17560	Banda_5_821.raw	1	1	330	346	Carbamidomethylation	C13:Carbamidomethylation:1000.00	PEAKS DB
36	48	A0A1S2XV08|A0A1S2XV08_CICAR	K.ATISIGSR.Q	Y	35.7	803.45	8	6	402.733	2	35.47	0	1	10117	Banda_5_821.raw	0	0	394	401			PEAKS DB
43	46	A0A1S2YZW8|A0A1S2YZW8_CICAR	K.EIEGLPATALGLAAQSAVSK.G	Y	61.79	1925.05	20	6	963.531	2	52.26	302070	1	17939	Banda_5_821.raw	1	1	282	301			PEAKS DB
43	46	A0A1S2YZW8|A0A1S2YZW8_CICAR	R.ESPDWQTLSEAR.K	Y	59.33	1417.65	12	3	709.831	2	45.64	693980	1	14649	Banda_5_821.raw	1	1	211	222			PEAKS DB
43	46	A0A1S2YZW8|A0A1S2YZW8_CICAR	K.EDEGLVAGIR.G	Y	52.84	1057.54	10	12	529.778	2	44.65	2375400	1	14138	Banda_5_821.raw	1	1	587	596			PEAKS DB
43	46	A0A1S2YZW8|A0A1S2YZW8_CICAR	K.FGENVLDATK.K	Y	52.24	1092.55	10	8	547.28	2	46.79	863660	1	15311	Banda_5_821.raw	1	1	262	271			PEAKS DB
43	46	A0A1S2YZW8|A0A1S2YZW8_CICAR	R.VLSPDGGNSSR.L	Y	42.05	1087.53	11	8	544.771	2	28.07	2134600	1	6864	Banda_5_821.raw	1	1	533	543			PEAKS DB
43	46	A0A1S2YZW8|A0A1S2YZW8_CICAR	K.TQVIPPLPEDR.F	Y	38.8	1263.68	11	8	632.849	2	45.57	2779200	1	14812	Banda_5_821.raw	1	1	689	699			PEAKS DB
43	46	A0A1S2YZW8|A0A1S2YZW8_CICAR	R.SAIEDVQADK.V	Y	36.65	1074.52	10	-13	538.266	2	30.77	873440	1	7882	Banda_5_821.raw	1	1	180	189			PEAKS DB
41	52	A0A1S2XH76|A0A1S2XH76_CICAR	R.FFTSNFNEETYTK.E	Y	62.33	1626.72	13	2	814.368	2	49.32	3034900	1	16629	Banda_5_821.raw	1	1	576	588			PEAKS DB
41	52	A0A1S2XH76|A0A1S2XH76_CICAR	K.EIPM(+15.99)NDLIGLQGENTLR.E	Y	58.88	1927.97	17	28	964.994	2	49.13	1183600	1	16439	Banda_5_821.raw	1	1	420	436	Oxidation (M)	M4:Oxidation (M):1000.00	PEAKS DB
41	52	A0A1S2XH76|A0A1S2XH76_CICAR	R.NVLPVDQK.K	Y	47.27	911.508	8	6	456.761	2	33.01	2493400	1	9656	Banda_5_821.raw	1	1	120	127			PEAKS DB
41	52	A0A1S2XH76|A0A1S2XH76_CICAR	R.GLLM(+15.99)IPISK.W	Y	42.71	986.583	9	-1	494.299	2	51.55	1509300	1	17530	Banda_5_821.raw	1	1	505	513	Oxidation (M)	M4:Oxidation (M):1000.00	PEAKS DB
41	52	A0A1S2XH76|A0A1S2XH76_CICAR	K.Q(-17.03)GNLHLNEDGTTISGDIR.N	Y	37.47	1921.91	18	7	961.965	2	44.58	1013500	1	14189	Banda_5_821.raw	1	1	253	270	Pyro-glu from Q	Q1:Pyro-glu from Q:1000.00	PEAKS DB
40	54	C3TS12|C3TS12_CICAR	K.GGIGVIQIDEAALR.E	Y	49.05	1410.78	14	8	706.399	2	51.37	3177700	1	17361	Banda_5_821.raw	1	1	597	610			PEAKS DB
40	54	C3TS12|C3TS12_CICAR	K.TLTSLSGVAAYGFDLVR.G	Y	45.41	1768.94	17	10	590.653	3	54.54	163970	1	18990	Banda_5_821.raw	1	1	254	270			PEAKS DB
40	54	C3TS12|C3TS12_CICAR	R.IPPTEEIADR.I	Y	39.23	1139.58	10	0	570.798	2	37.22	2244700	1	10901	Banda_5_821.raw	1	1	705	714			PEAKS DB
40	54	C3TS12|C3TS12_CICAR	K.YIPSNTFSYYDQVLDATATLGAVPPR.Y	Y	34.74	2858.41	26	22	953.814	3	54.96	595180	1	19102	Banda_5_821.raw	1	1	56	81			PEAKS DB
48	55	A0A1S2XVJ8|A0A1S2XVJ8_CICAR	R.NIENYGLAVLEVK.G	Y	54.87	1460.79	13	14	731.402	2	52.59	4742300	1	18041	Banda_5_821.raw	1	1	120	132			PEAKS DB
48	55	A0A1S2XVJ8|A0A1S2XVJ8_CICAR	K.EVAYEYPAEK.V	Y	53.69	1197.56	10	-4	599.785	2	32.14	5433200	1	8668	Banda_5_821.raw	2	2	435	444			PEAKS DB
48	55	A0A1S2XVJ8|A0A1S2XVJ8_CICAR	R.NPESVLTAFSSK.V	Y	46.83	1278.65	12	12	640.331	2	50.49	42500	1	16865	Banda_5_821.raw	1	1	223	234			PEAKS DB
54	80	A0A3Q7XPH5|A0A3Q7XPH5_CICAR	R.DNQTLILVGETGSGK.T	Y	63.17	1530.79	15	-7	766.401	2	44.36	0	1	14092	Banda_5_821.raw	0	0	72	86			PEAKS DB
54	80	A0A3Q7XPH5|A0A3Q7XPH5_CICAR	K.VSLFDVVDDSAAK.M	Y	40.55	1364.68	13	19	683.35	2	52.03	335540	1	17853	Banda_5_821.raw	1	1	9	21			PEAKS DB
54	80	A0A3Q7XPH5|A0A3Q7XPH5_CICAR	K.IFEPAPPPVK.E	Y	39.76	1093.62	10	13	547.817	2	44.28	726980	1	14066	Banda_5_821.raw	1	1	322	331			PEAKS DB
50	76	A0A1S2XVM2|A0A1S2XVM2_CICAR	K.IAVVTGGDSGIGR.S	Y	66.12	1200.65	13	39	601.333	2	43.34	190500	1	13227	Banda_5_821.raw	1	1	75	87			PEAKS DB
50	76	A0A1S2XVM2|A0A1S2XVM2_CICAR	K.EGSSIINTTSVNAYK.G	Y	38.44	1582.78	15	3	792.399	2	40.91	1527100	1	12326	Banda_5_821.raw	1	1	206	220			PEAKS DB
44	66	A0A1S2YQT1|A0A1S2YQT1_CICAR	R.Q(-17.03)PPLGSEEWITFLDSEGR.V	Y	50.58	2042.96	18	15	1022.49	2	58.3	30218	1	20622	Banda_5_821.raw	1	1	373	390	Pyro-glu from Q	Q1:Pyro-glu from Q:1000.00	PEAKS DB
44	66	A0A1S2YQT1|A0A1S2YQT1_CICAR	R.SITFYEGDDNPNVNVLR.D	Y	50.36	1951.93	17	27	976.974	2	49.56	0	1	16600	Banda_5_821.raw	0	0	480	496			PEAKS DB
44	66	A0A1S2YQT1|A0A1S2YQT1_CICAR	R.QPPLGSEEWITFLDSEGR.V	Y	47.65	2059.99	18	-15	1031	2	58.22	26325	1	20635	Banda_5_821.raw	1	1	373	390			PEAKS DB
55	82	A0A1S2YC83|A0A1S2YC83_CICAR	R.VVVAYGGAPINQQLR.E	Y	53.4	1583.88	15	17	792.948	2	46.32	47740	1	14782	Banda_5_821.raw	1	1	259	273			PEAKS DB
55	82	A0A1S2YC83|A0A1S2YC83_CICAR	R.TVC(+57.02)PLALVLSPTR.E	Y	40.88	1425.8	13	8	713.909	2	53.73	84288	1	18663	Banda_5_821.raw	1	1	226	238	Carbamidomethylation	C3:Carbamidomethylation:1000.00	PEAKS DB
47	65	A0A1S2YZ56|A0A1S2YZ56_CICAR	K.Q(-17.03)IVATSLC(+57.02)VSK.R	Y	37.62	1187.62	11	7	594.819	2	39.7	326720	1	11939	Banda_5_821.raw	1	1	432	442	Pyro-glu from Q; Carbamidomethylation	Q1:Pyro-glu from Q:1000.00;C8:Carbamidomethylation:1000.00	PEAKS DB
52	74	A0A1S2XVG1|A0A1S2XVG1_CICAR	R.LSAEYVLLYR.N	Y	44.21	1225.67	10	-10	613.842	2	52.26	117300	1	17888	Banda_5_821.raw	1	1	399	408			PEAKS DB
52	74	A0A1S2XVG1|A0A1S2XVG1_CICAR	K.GVLGLSIPGC(+57.02)PTTFEEQR.Q	Y	43.37	1959.97	18	22	980.996	2	52.14	43260	1	18064	Banda_5_821.raw	1	1	103	120	Carbamidomethylation	C10:Carbamidomethylation:1000.00	PEAKS DB
59	99	A0A1S2XHQ9|A0A1S2XHQ9_CICAR	R.VETGVIKPGVIVTFGPTGLTTEVK.S	Y	50.65	2441.38	24	13	814.801	3	52.89	1455300	1	18172	Banda_5_821.raw	1	1	255	278			PEAKS DB
59	99	A0A1S2XHQ9|A0A1S2XHQ9_CICAR	K.IGGIGTVPVGR.V	Y	45.69	1024.6	11	-7	513.308	2	45.02	3132400	1	14306	Banda_5_821.raw	1	1	244	254			PEAKS DB
62	112	A0A1S2YCQ2|A0A1S2YCQ2_CICAR	R.IVGVSEETTTGVK.R	Y	50.51	1318.7	13	10	660.357	2	36.62	2439800	1	10518	Banda_5_821.raw	1	1	199	211			PEAKS DB
62	112	A0A1S2YCQ2|A0A1S2YCQ2_CICAR	R.TEFGPSQPFK.G	Y	45.86	1136.55	10	2	569.283	2	45.06	1956500	1	14373	Banda_5_821.raw	1	1	44	53			PEAKS DB
56	137	A0A1S2XSP2|A0A1S2XSP2_CICAR	R.YDTAVNPQQR.Y	Y	49.53	1190.57	10	14	596.292	2	28.01	478470	1	6875	Banda_5_821.raw	2	2	18	27			PEAKS DB
56	137	A0A1S2XSP2|A0A1S2XSP2_CICAR	R.YETSAVNPQQR.Y	Y	37.46	1291.62	11	5	646.815	2	28.19	728360	1	6664	Banda_5_821.raw	1	1	28	38			PEAKS DB

## Sheet: 5
Protein ID	Protein Accession	Peptide	Unique	Score	Mass	Length	ppm	m/z	z	RT	Area Sample	Fraction	Scan	Source File	#Feature	#Feature Sample 1	Start	End	PTM	AScore	Found By
4	A0A1S2XH76|A0A1S2XH76_CICAR	R.YNDPFNDGAGSQGTFFGR.N	Y	102.43	1948.83	18	7	975.425	2	53.64	36852000	1	18958	Banda_6_806.raw	2	2	102	119			PEAKS DB
4	A0A1S2XH76|A0A1S2XH76_CICAR	K.Q(-17.03)GNLHLNEDGTTISGDIR.N	Y	94.01	1921.91	18	16	961.965	2	45.84	48056000	1	15179	Banda_6_806.raw	2	2	253	270	Pyro-glu from Q	Q1:Pyro-glu from Q:1000.00	PEAKS DB
4	A0A1S2XH76|A0A1S2XH76_CICAR	K.EIPM(+15.99)NDLIGLQGENTLR.E	Y	83.93	1927.97	17	9	964.992	2	51.68	68437000	1	17851	Banda_6_806.raw	2	2	420	436	Oxidation (M)	M4:Oxidation (M):1000.00	PEAKS DB
4	A0A1S2XH76|A0A1S2XH76_CICAR	K.EIPMNDLIGLQGENTLR.E	Y	82.52	1911.97	17	2	956.994	2	54.45	5336800	1	19516	Banda_6_806.raw	2	2	420	436			PEAKS DB
4	A0A1S2XH76|A0A1S2XH76_CICAR	K.EGLEWVNTTETLK.D	Y	79.79	1518.76	13	12	760.386	2	53.3	57326000	1	18742	Banda_6_806.raw	1	1	589	601			PEAKS DB
4	A0A1S2XH76|A0A1S2XH76_CICAR	R.FFTSNFNEETYTK.E	Y	79.04	1626.72	13	11	814.368	2	52.46	88115000	1	18004	Banda_6_806.raw	1	1	576	588			PEAKS DB
4	A0A1S2XH76|A0A1S2XH76_CICAR	R.TPWWDGSVIYGSNEEVLK.K	Y	68.44	2078.99	18	15	1040.51	2	55.6	7669400	1	19683	Banda_6_806.raw	1	1	221	238			PEAKS DB
4	A0A1S2XH76|A0A1S2XH76_CICAR	R.DLVPHNVDGTER.S	Y	65.09	1350.65	12	9	676.334	2	52.18	73507000	1	17902	Banda_6_806.raw	2	2	466	477			PEAKS DB
4	A0A1S2XH76|A0A1S2XH76_CICAR	K.LLKPDPM(+15.99)VVATK.L	Y	62.88	1326.76	12	14	664.387	2	53.12	8123000	1	18299	Banda_6_806.raw	2	2	130	141	Oxidation (M)	M7:Oxidation (M):1000.00	PEAKS DB
4	A0A1S2XH76|A0A1S2XH76_CICAR	K.QGNLHLNEDGTTISGDIR.N	Y	62.64	1938.94	18	-6	970.476	2	52.84	2847200	1	18234	Banda_6_806.raw	1	1	253	270			PEAKS DB
4	A0A1S2XH76|A0A1S2XH76_CICAR	R.DISATPGHNK.S	Y	61.7	1038.51	10	-4	520.262	2	43.04	44193000	1	13544	Banda_6_806.raw	1	1	404	413			PEAKS DB
4	A0A1S2XH76|A0A1S2XH76_CICAR	K.TENHGVPYSLTEEFVSVYR.M	Y	61.37	2226.06	19	11	743.028	3	56.02	243400	1	19888	Banda_6_806.raw	1	1	373	391			PEAKS DB
4	A0A1S2XH76|A0A1S2XH76_CICAR	R.NVLPVDQK.K	Y	60.99	911.508	8	11	456.762	2	38.31	156150000	1	11627	Banda_6_806.raw	2	2	120	127			PEAKS DB
4	A0A1S2XH76|A0A1S2XH76_CICAR	R.SNPVDFPYR.T	Y	58.98	1093.52	9	9	547.767	2	47.26	151560000	1	15556	Banda_6_806.raw	1	1	88	96			PEAKS DB
4	A0A1S2XH76|A0A1S2XH76_CICAR	M(+15.99)WSIVTDPIQLLVTR.I	Y	58.89	1786.97	15	11	894.491	2	58.43	1723700	1	21043	Banda_6_806.raw	1	1	1	15	Oxidation (M)	M1:Oxidation (M):1000.00	PEAKS DB
4	A0A1S2XH76|A0A1S2XH76_CICAR	K.LLKPDPMVVATK.L	Y	57.9	1310.76	12	2	437.928	3	54.21	5476300	1	19118	Banda_6_806.raw	1	1	130	141			PEAKS DB
4	A0A1S2XH76|A0A1S2XH76_CICAR	R.EVASQC(+57.02)PLK.S	Y	57.27	1030.51	9	8	516.264	2	21.77	43074000	1	4516	Banda_6_806.raw	2	2	187	195	Carbamidomethylation	C6:Carbamidomethylation:1000.00	PEAKS DB
4	A0A1S2XH76|A0A1S2XH76_CICAR	K.TKEIPTGFYEIK.T	Y	55.17	1424.76	12	5	475.926	3	54.43	15911000	1	19130	Banda_6_806.raw	2	2	202	213			PEAKS DB
4	A0A1S2XH76|A0A1S2XH76_CICAR	R.TPWWDGSVIYGSNEEVLKK.V	Y	54.25	2207.09	19	5	736.704	3	55.6	133100	1	19999	Banda_6_806.raw	1	1	221	239			PEAKS DB
4	A0A1S2XH76|A0A1S2XH76_CICAR	R.ANWYGLLGK.K	Y	51.1	1020.54	9	-6	511.277	2	55.04	27975000	1	19364	Banda_6_806.raw	1	1	342	350			PEAKS DB
4	A0A1S2XH76|A0A1S2XH76_CICAR	Y.NLFNVGTTPIGVR.S	Y	50.67	1386.76	13	1	694.388	2	54.99	1009400	1	19549	Banda_6_806.raw	1	1	75	87			PEAKS DB
4	A0A1S2XH76|A0A1S2XH76_CICAR	R.E(-18.01)VASQC(+57.02)PLK.S	Y	50.4	1012.5	9	-8	507.257	2	28.79	643040	1	7180	Banda_6_806.raw	1	1	187	195	Pyro-glu from E; Carbamidomethylation	E1:Pyro-glu from E:1000.00;C6:Carbamidomethylation:1000.00	PEAKS DB
4	A0A1S2XH76|A0A1S2XH76_CICAR	K.TDTLLAGM(+15.99)R.A	Y	50.29	992.496	9	-1	497.255	2	40.07	7111000	1	12413	Banda_6_806.raw	1	1	333	341	Oxidation (M)	M8:Oxidation (M):1000.00	PEAKS DB
4	A0A1S2XH76|A0A1S2XH76_CICAR	M(+15.99)(+42.01)WSIVTDPIQLLVTR.I	Y	50.16	1828.98	15	3	915.495	2	64	102820	1	23370	Banda_6_806.raw	1	1	1	15	Oxidation (M); Acetylation (Protein N-term)	M1:Oxidation (M):1000.00;M1:Acetylation (Protein N-term):1000.00	PEAKS DB
4	A0A1S2XH76|A0A1S2XH76_CICAR	R.LVTSAVIAK.I	N	48.91	900.564	9	-11	451.289	2	41.82	194520000	1	13230	Banda_6_806.raw	2	2	312	320			PEAKS DB
4	A0A1S2XH76|A0A1S2XH76_CICAR	R.SDHVDLAALEIYR.D	Y	48.8	1500.76	13	10	751.387	2	55.43	641640	1	19669	Banda_6_806.raw	1	1	478	490			PEAKS DB
4	A0A1S2XH76|A0A1S2XH76_CICAR	K.TDTLLAGMR.A	Y	46.37	976.501	9	5	489.258	2	52.31	8767500	1	18137	Banda_6_806.raw	1	1	333	341			PEAKS DB
4	A0A1S2XH76|A0A1S2XH76_CICAR	K.EIPTGFYEIK.T	Y	44.26	1195.61	10	11	598.814	2	53.38	112040000	1	18379	Banda_6_806.raw	1	1	204	213			PEAKS DB
4	A0A1S2XH76|A0A1S2XH76_CICAR	R.GLLMIPISK.W	Y	44.17	970.588	9	-25	486.3	2	54.41	7132200	1	19693	Banda_6_806.raw	1	1	505	513			PEAKS DB
4	A0A1S2XH76|A0A1S2XH76_CICAR	K.E(-18.01)GLEWVNTTETLKDVIDR.H	Y	43.54	2099.05	18	18	1050.54	2	56.72	106260	1	20406	Banda_6_806.raw	1	1	589	606	Pyro-glu from E	E1:Pyro-glu from E:1000.00	PEAKS DB
7	A0A1S2YJT8|A0A1S2YJT8_CICAR	K.NAVVTVPAYFNDSQR.Q	N	93.27	1679.83	15	15	840.922	2	49.92	37098000	1	16733	Banda_6_806.raw	2	2	145	159			PEAKS DB
7	A0A1S2YJT8|A0A1S2YJT8_CICAR	K.ATAGDTHLGGEDFDNR.M	N	89.08	1674.72	16	8	838.37	2	51.9	5977600	1	17888	Banda_6_806.raw	1	1	227	242			PEAKS DB
7	A0A1S2YJT8|A0A1S2YJT8_CICAR	R.IINEPTAAAIAYGLDK.K	N	84.09	1658.89	16	17	830.453	2	53.49	35181000	1	18909	Banda_6_806.raw	2	2	176	191			PEAKS DB
7	A0A1S2YJT8|A0A1S2YJT8_CICAR	K.SINPDEAVAYGAAVQAAILSGEGNEK.V	N	81.26	2573.26	26	10	1287.64	2	55.81	23292000	1	19796	Banda_6_806.raw	2	2	368	393			PEAKS DB
7	A0A1S2YJT8|A0A1S2YJT8_CICAR	R.IINEPTAAAIAYGLDKK.A	N	78.26	1786.98	17	19	596.669	3	54.68	43492000	1	19220	Banda_6_806.raw	2	2	176	192			PEAKS DB
7	A0A1S2YJT8|A0A1S2YJT8_CICAR	K.NQVAM(+15.99)NPTNTVFDAK.R	N	77.53	1664.78	15	15	833.4	2	39.64	34425000	1	12122	Banda_6_806.raw	1	1	60	74	Oxidation (M)	M5:Oxidation (M):1000.00	PEAKS DB
7	A0A1S2YJT8|A0A1S2YJT8_CICAR	R.TTPSYVAFTDTER.L	N	75.51	1486.69	13	11	744.355	2	46.51	32469000	1	15315	Banda_6_806.raw	1	1	40	52			PEAKS DB
7	A0A1S2YJT8|A0A1S2YJT8_CICAR	K.EIAEAYLGSTVK.N	N	72.31	1279.67	12	15	640.841	2	47.77	36507000	1	15839	Banda_6_806.raw	1	1	133	144			PEAKS DB
7	A0A1S2YJT8|A0A1S2YJT8_CICAR	R.ISDASVQSDM(+15.99)K.L	N	68.24	1195.54	11	-2	598.777	2	31.02	29328000	1	8287	Banda_6_806.raw	2	2	81	91	Oxidation (M)	M10:Oxidation (M):1000.00	PEAKS DB
7	A0A1S2YJT8|A0A1S2YJT8_CICAR	K.EQVFSTYSDNQPGVLIQVYEGER.T	N	65.22	2657.26	23	-3	1329.64	2	54.18	13205000	1	19329	Banda_6_806.raw	2	2	431	453			PEAKS DB
7	A0A1S2YJT8|A0A1S2YJT8_CICAR	Y.GAAVQAAILSGEGNEK.V	N	57.32	1513.77	16	1	757.894	2	43.52	716630	1	13894	Banda_6_806.raw	1	1	378	393			PEAKS DB
7	A0A1S2YJT8|A0A1S2YJT8_CICAR	R.FEELNM(+15.99)DLFR.K	N	53.22	1328.61	10	0	665.311	2	54.14	3775500	1	18959	Banda_6_806.raw	1	1	308	317	Oxidation (M)	M6:Oxidation (M):1000.00	PEAKS DB
7	A0A1S2YJT8|A0A1S2YJT8_CICAR	R.VEIIANDQGNR.T	N	49.38	1227.62	11	13	614.818	2	36.47	51315000	1	10434	Banda_6_806.raw	1	1	29	39			PEAKS DB
7	A0A1S2YJT8|A0A1S2YJT8_CICAR	R.FEELNMDLFR.K	N	49.26	1312.61	10	7	657.314	2	55.85	547210	1	20060	Banda_6_806.raw	1	1	308	317			PEAKS DB
7	A0A1S2YJT8|A0A1S2YJT8_CICAR	K.DAGVISGLNVM(+15.99)R.I	Y	47.85	1246.63	12	9	624.325	2	44.69	10951000	1	14566	Banda_6_806.raw	1	1	164	175	Oxidation (M)	M11:Oxidation (M):1000.00	PEAKS DB
7	A0A1S2YJT8|A0A1S2YJT8_CICAR	K.NQVAMNPTNTVFDAK.R	N	47.72	1648.79	15	19	825.403	2	45.15	2739500	1	14556	Banda_6_806.raw	1	1	60	74			PEAKS DB
7	A0A1S2YJT8|A0A1S2YJT8_CICAR	K.M(+15.99)KEIAEAYLGSTVK.N	Y	45.92	1554.8	14	21	519.274	3	53.78	4719800	1	18663	Banda_6_806.raw	1	1	131	144	Oxidation (M)	M1:Oxidation (M):1000.00	PEAKS DB
6	A0A3Q7XXP6|A0A3Q7XXP6_CICAR	K.NAVVTVPAYFNDSQR.Q	N	93.27	1679.83	15	15	840.922	2	49.92	37098000	1	16733	Banda_6_806.raw	2	2	145	159			PEAKS DB
6	A0A3Q7XXP6|A0A3Q7XXP6_CICAR	K.ATAGDTHLGGEDFDNR.M	N	89.08	1674.72	16	8	838.37	2	51.9	5977600	1	17888	Banda_6_806.raw	1	1	227	242			PEAKS DB
6	A0A3Q7XXP6|A0A3Q7XXP6_CICAR	R.IINEPTAAAIAYGLDK.K	N	84.09	1658.89	16	17	830.453	2	53.49	35181000	1	18909	Banda_6_806.raw	2	2	176	191			PEAKS DB
6	A0A3Q7XXP6|A0A3Q7XXP6_CICAR	K.SINPDEAVAYGAAVQAAILSGEGNEK.V	N	81.26	2573.26	26	10	1287.64	2	55.81	23292000	1	19796	Banda_6_806.raw	2	2	368	393			PEAKS DB
6	A0A3Q7XXP6|A0A3Q7XXP6_CICAR	R.IINEPTAAAIAYGLDKK.A	N	78.26	1786.98	17	19	596.669	3	54.68	43492000	1	19220	Banda_6_806.raw	2	2	176	192			PEAKS DB
6	A0A3Q7XXP6|A0A3Q7XXP6_CICAR	K.NQVAM(+15.99)NPTNTVFDAK.R	N	77.53	1664.78	15	15	833.4	2	39.64	34425000	1	12122	Banda_6_806.raw	1	1	60	74	Oxidation (M)	M5:Oxidation (M):1000.00	PEAKS DB
6	A0A3Q7XXP6|A0A3Q7XXP6_CICAR	R.EIAEAYLGSTVK.N	N	72.31	1279.67	12	15	640.841	2	47.77	36507000	1	15839	Banda_6_806.raw	1	1	133	144			PEAKS DB
6	A0A3Q7XXP6|A0A3Q7XXP6_CICAR	R.TTPSYVAFTDSER.L	Y	69.16	1472.68	13	19	737.348	2	42.98	36246000	1	14747	Banda_6_806.raw	2	2	40	52			PEAKS DB
6	A0A3Q7XXP6|A0A3Q7XXP6_CICAR	R.ISDASVQSDM(+15.99)K.L	N	68.24	1195.54	11	-2	598.777	2	31.02	29328000	1	8287	Banda_6_806.raw	2	2	81	91	Oxidation (M)	M10:Oxidation (M):1000.00	PEAKS DB
6	A0A3Q7XXP6|A0A3Q7XXP6_CICAR	K.EQVFSTYSDNQPGVLIQVYEGER.T	N	65.22	2657.26	23	-3	1329.64	2	54.18	13205000	1	19329	Banda_6_806.raw	2	2	753	775			PEAKS DB
6	A0A3Q7XXP6|A0A3Q7XXP6_CICAR	Y.GAAVQAAILSGEGNEK.V	N	57.32	1513.77	16	1	757.894	2	43.52	716630	1	13894	Banda_6_806.raw	1	1	378	393			PEAKS DB
6	A0A3Q7XXP6|A0A3Q7XXP6_CICAR	R.FEELNM(+15.99)DLFR.K	N	53.22	1328.61	10	0	665.311	2	54.14	3775500	1	18959	Banda_6_806.raw	1	1	308	317	Oxidation (M)	M6:Oxidation (M):1000.00	PEAKS DB
6	A0A3Q7XXP6|A0A3Q7XXP6_CICAR	R.VEIIANDQGNR.T	N	49.38	1227.62	11	13	614.818	2	36.47	51315000	1	10434	Banda_6_806.raw	1	1	29	39			PEAKS DB
6	A0A3Q7XXP6|A0A3Q7XXP6_CICAR	R.FEELNMDLFR.K	N	49.26	1312.61	10	7	657.314	2	55.85	547210	1	20060	Banda_6_806.raw	1	1	308	317			PEAKS DB
6	A0A3Q7XXP6|A0A3Q7XXP6_CICAR	K.NQVAMNPTNTVFDAK.R	N	47.72	1648.79	15	19	825.403	2	45.15	2739500	1	14556	Banda_6_806.raw	1	1	60	74			PEAKS DB
6	A0A3Q7XXP6|A0A3Q7XXP6_CICAR	K.STVHDVVLVGGSTR.I	Y	46.48	1425.76	14	8	713.887	2	53.32	16184000	1	18466	Banda_6_806.raw	2	2	335	348			PEAKS DB
6	A0A3Q7XXP6|A0A3Q7XXP6_CICAR	K.DAGVIAGLNVLR.I	Y	45.33	1196.69	12	-1	599.351	2	54.39	14442000	1	19173	Banda_6_806.raw	1	1	164	175			PEAKS DB
9	A0A1S2Y087|A0A1S2Y087_CICAR	R.NFLAGEDDNVISQIQNPVK.E	Y	107.72	2100.05	19	6	1051.03	2	53.45	36691000	1	18787	Banda_6_806.raw	2	2	525	543			PEAKS DB
9	A0A1S2Y087|A0A1S2Y087_CICAR	R.VLLEEQEPEQSR.G	Y	77.04	1455.72	12	6	728.868	2	39.54	100320000	1	11887	Banda_6_806.raw	1	1	331	342			PEAKS DB
9	A0A1S2Y087|A0A1S2Y087_CICAR	R.GSEESEEGDAIVK.V	Y	71.27	1348.6	13	3	675.307	2	34.77	39745000	1	9881	Banda_6_806.raw	1	1	346	358			PEAKS DB
9	A0A1S2Y087|A0A1S2Y087_CICAR	R.Q(-17.03)SYFANAQPQQR.E	Y	68.43	1419.65	12	7	710.834	2	34	21744000	1	9556	Banda_6_806.raw	1	1	563	574	Pyro-glu from Q	Q1:Pyro-glu from Q:1000.00	PEAKS DB
9	A0A1S2Y087|A0A1S2Y087_CICAR	K.ELTFPGSAQEVNR.L	Y	66.83	1446.71	13	-1	724.362	2	46.8	63109000	1	15545	Banda_6_806.raw	1	1	544	556			PEAKS DB
9	A0A1S2Y087|A0A1S2Y087_CICAR	R.QSYFANAQPQQR.E	Y	61.03	1436.68	12	30	719.349	2	33.91	117230	1	9318	Banda_6_806.raw	1	1	563	574			PEAKS DB
9	A0A1S2Y087|A0A1S2Y087_CICAR	R.SNLFQNLQNYR.F	Y	59.07	1395.69	11	1	698.852	2	54.08	11232000	1	18910	Banda_6_806.raw	1	1	199	209			PEAKS DB
9	A0A1S2Y087|A0A1S2Y087_CICAR	K.AILTVLNPNDR.N	N	58.4	1224.68	11	7	613.349	2	53.69	49854000	1	19086	Banda_6_806.raw	1	1	239	249			PEAKS DB
9	A0A1S2Y087|A0A1S2Y087_CICAR	R.EQIEELSK.H	N	54.33	974.492	8	2	975.5	1	35.93	99012000	1	10385	Banda_6_806.raw	2	2	362	369			PEAKS DB
9	A0A1S2Y087|A0A1S2Y087_CICAR	K.E(-18.01)LTFPGSAQEVNR.L	Y	54.02	1428.7	13	2	715.357	2	41.9	1445600	1	13003	Banda_6_806.raw	1	1	544	556	Pyro-glu from E	E1:Pyro-glu from E:1000.00	PEAKS DB
9	A0A1S2Y087|A0A1S2Y087_CICAR	K.LPAGTTAYLANHDDEEDLR.V	Y	53.61	2099.98	19	19	701	3	53.42	16936000	1	18490	Banda_6_806.raw	1	1	262	280			PEAKS DB
9	A0A1S2Y087|A0A1S2Y087_CICAR	K.SESKEDEEESSSESQGR.R	Y	52.92	1898.76	17	9	950.389	2	36.19	994600	1	10467	Banda_6_806.raw	2	2	151	167			PEAKS DB
9	A0A1S2Y087|A0A1S2Y087_CICAR	K.SILEASFNTK.Y	Y	52.39	1108.58	10	-7	1109.58	1	52.83	50915000	1	18564	Banda_6_806.raw	2	2	315	324			PEAKS DB
9	A0A1S2Y087|A0A1S2Y087_CICAR	K.FFEITPEK.S	N	52.16	1009.51	8	7	1010.52	1	53.27	53919000	1	18526	Banda_6_806.raw	2	2	402	409			PEAKS DB
9	A0A1S2Y087|A0A1S2Y087_CICAR	R.VVELAIPVNRPGK.F	Y	51.13	1390.83	13	-1	696.422	2	54.08	32237000	1	19507	Banda_6_806.raw	2	2	281	293			PEAKS DB
9	A0A1S2Y087|A0A1S2Y087_CICAR	K.SISSESEPFNLR.S	Y	46.42	1364.66	12	3	683.336	2	50.65	34064000	1	17409	Banda_6_806.raw	1	1	378	389			PEAKS DB
9	A0A1S2Y087|A0A1S2Y087_CICAR	R.NPIYSNK.F	N	45.76	834.423	7	12	835.432	1	35.19	1186700	1	10175	Banda_6_806.raw	1	1	392	398			PEAKS DB
9	A0A1S2Y087|A0A1S2Y087_CICAR	R.NSFNLER.G	Y	45.36	878.425	7	-5	440.219	2	43.47	45438000	1	13673	Banda_6_806.raw	1	1	250	256			PEAKS DB
9	A0A1S2Y087|A0A1S2Y087_CICAR	R.RGSEESEEGDAIVK.V	Y	44.63	1504.7	14	9	502.575	3	51.83	24866000	1	17838	Banda_6_806.raw	2	2	345	358			PEAKS DB
9	A0A1S2Y087|A0A1S2Y087_CICAR	R.NEQQEQQQEEDEEQEEEER.N	Y	44.16	2461.96	19	6	1231.99	2	29.56	2016600	1	7537	Banda_6_806.raw	1	1	459	477			PEAKS DB
9	A0A1S2Y087|A0A1S2Y087_CICAR	R.SRNPIYSNK.F	N	44.15	1077.56	9	0	539.786	2	52.48	9536400	1	18345	Banda_6_806.raw	1	1	390	398			PEAKS DB
9	A0A1S2Y087|A0A1S2Y087_CICAR	R.REEEEYEER.S	Y	42.57	1267.53	9	6	634.773	2	51.5	2239500	1	17840	Banda_6_806.raw	1	1	56	64			PEAKS DB
8	A0A1S2XET4|A0A1S2XET4_CICAR	R.IQAQGPGNQVDQGR.G	Y	85.12	1466.72	14	9	734.369	2	32.2	14105000	1	8714	Banda_6_806.raw	1	1	475	488			PEAKS DB
8	A0A1S2XET4|A0A1S2XET4_CICAR	R.NQAQENAM(+15.99)EAISGAQER.Y	Y	76.68	1861.82	17	12	931.92	2	34.92	3144700	1	9976	Banda_6_806.raw	1	1	222	238	Oxidation (M)	M8:Oxidation (M):1000.00	PEAKS DB
8	A0A1S2XET4|A0A1S2XET4_CICAR	K.KPTNETLTNTTQTAQGK.E	Y	75.39	1831.93	17	1	611.65	3	44.58	9405400	1	14385	Banda_6_806.raw	3	3	244	260			PEAKS DB
8	A0A1S2XET4|A0A1S2XET4_CICAR	R.GSNVVSSIGETVGK.L	Y	75.15	1332.69	14	1	667.352	2	44.07	12805000	1	14131	Banda_6_806.raw	1	1	489	502			PEAKS DB
8	A0A1S2XET4|A0A1S2XET4_CICAR	K.AAANVVEGAAR.Y	Y	74.56	1027.54	11	1	514.778	2	34.94	30455000	1	9854	Banda_6_806.raw	1	1	383	393			PEAKS DB
8	A0A1S2XET4|A0A1S2XET4_CICAR	K.TAAEYVSPVAEK.T	Y	71.23	1263.63	12	5	632.825	2	36.72	6097400	1	10594	Banda_6_806.raw	1	1	339	350			PEAKS DB
8	A0A1S2XET4|A0A1S2XET4_CICAR	R.LGYGAENER.A	Y	63.88	1007.47	9	11	504.741	2	36.22	12904000	1	10482	Banda_6_806.raw	1	1	177	185			PEAKS DB
8	A0A1S2XET4|A0A1S2XET4_CICAR	K.GLAASAGESAK.E	Y	61.32	960.487	11	7	481.251	2	34.24	16487000	1	9522	Banda_6_806.raw	1	1	412	422			PEAKS DB
8	A0A1S2XET4|A0A1S2XET4_CICAR	K.VIVVGEGDVEEK.Q	Y	61.1	1271.66	12	-5	636.837	2	40.49	15508000	1	12520	Banda_6_806.raw	1	1	625	636			PEAKS DB
8	A0A1S2XET4|A0A1S2XET4_CICAR	R.DVGNFEVESK.G	Y	59.8	1122.52	10	-1	562.267	2	37.19	15223000	1	10775	Banda_6_806.raw	1	1	111	120			PEAKS DB
8	A0A1S2XET4|A0A1S2XET4_CICAR	K.KPIENVISSGEEK.N	Y	50.22	1428.75	13	-4	715.38	2	52.58	1235100	1	18079	Banda_6_806.raw	1	1	546	558			PEAKS DB
8	A0A1S2XET4|A0A1S2XET4_CICAR	K.KPIENM(+15.99)TSSGNQVDQGGGSNVVSGIGETVGK.L	Y	48.92	3061.46	31	7	1021.5	3	50.29	2355700	1	17227	Banda_6_806.raw	1	1	509	539	Oxidation (M)	M6:Oxidation (M):1000.00	PEAKS DB
8	A0A1S2XET4|A0A1S2XET4_CICAR	K.DTVSSVAK.T	Y	48.46	805.418	8	-6	403.716	2	17.81	749540	1	3376	Banda_6_806.raw	2	2	331	338			PEAKS DB
8	A0A1S2XET4|A0A1S2XET4_CICAR	K.GEQNFGTGR.L	Y	47.06	964.436	9	-6	483.225	2	34.27	1015000	1	9826	Banda_6_806.raw	1	1	168	176			PEAKS DB
8	A0A1S2XET4|A0A1S2XET4_CICAR	K.ATAAGWTAAHYSTQLTVDGTK.A	Y	44.88	2149.04	21	6	717.356	3	53.49	487700	1	18492	Banda_6_806.raw	1	1	362	382			PEAKS DB
8	A0A1S2XET4|A0A1S2XET4_CICAR	K.ETVSDIGNNM(+15.99)IK.S	Y	44.4	1335.63	12	12	668.825	2	35.85	4691100	1	10259	Banda_6_806.raw	1	1	578	589	Oxidation (M)	M10:Oxidation (M):1000.00	PEAKS DB
10	A0A1S2YEC8|A0A1S2YEC8_CICAR	R.DAVVTVPAYFNDAQR.Q	N	88.83	1664.82	15	17	833.417	2	49.71	9775600	1	16575	Banda_6_806.raw	1	1	173	187			PEAKS DB
10	A0A1S2YEC8|A0A1S2YEC8_CICAR	R.IINEPTAAAIAYGLDK.K	N	84.09	1658.89	16	17	830.453	2	53.49	35181000	1	18909	Banda_6_806.raw	2	2	204	219			PEAKS DB
10	A0A1S2YEC8|A0A1S2YEC8_CICAR	R.IINEPTAAAIAYGLDKK.G	N	78.26	1786.98	17	19	596.669	3	54.68	43492000	1	19220	Banda_6_806.raw	2	2	204	220			PEAKS DB
10	A0A1S2YEC8|A0A1S2YEC8_CICAR	K.FDLSGIPPAPR.G	Y	77.32	1168.62	11	0	585.319	2	52.12	746300	1	17887	Banda_6_806.raw	1	1	490	500			PEAKS DB
10	A0A1S2YEC8|A0A1S2YEC8_CICAR	K.NQIDEIVLVGGSTR.I	N	70.8	1499.79	14	8	750.905	2	52.12	6737500	1	17956	Banda_6_806.raw	1	1	360	373			PEAKS DB
10	A0A1S2YEC8|A0A1S2YEC8_CICAR	K.VFSPEEISAM(+15.99)ILTK.M	N	67.23	1579.82	14	10	790.916	2	55.41	3970700	1	19605	Banda_6_806.raw	1	1	145	158	Oxidation (M)	M10:Oxidation (M):1000.00	PEAKS DB
10	A0A1S2YEC8|A0A1S2YEC8_CICAR	R.ITPSWVAFTDSER.L	N	67.04	1507.73	13	9	754.873	2	54.48	6987300	1	19187	Banda_6_806.raw	1	1	68	80			PEAKS DB
10	A0A1S2YEC8|A0A1S2YEC8_CICAR	K.DAGVIAGLNVAR.I	N	52.96	1154.64	12	1	578.328	2	48.32	11671000	1	15993	Banda_6_806.raw	1	1	192	203			PEAKS DB
10	A0A1S2YEC8|A0A1S2YEC8_CICAR	K.NGHVEIIANDQGNR.I	N	51.3	1535.74	14	-4	512.922	3	52	2813600	1	17624	Banda_6_806.raw	1	1	54	67			PEAKS DB
10	A0A1S2YEC8|A0A1S2YEC8_CICAR	K.DGKPYIQVK.I	Y	51.18	1046.58	9	4	524.295	2	51.86	2813200	1	17930	Banda_6_806.raw	1	1	129	137			PEAKS DB
10	A0A1S2YEC8|A0A1S2YEC8_CICAR	H.VEIIANDQGNR.I	N	49.38	1227.62	11	13	614.818	2	36.47	51315000	1	10434	Banda_6_806.raw	1	1	57	67			PEAKS DB
10	A0A1S2YEC8|A0A1S2YEC8_CICAR	R.LSQEEIDR.M	N	46.42	988.482	8	11	495.249	2	34.93	18054000	1	9813	Banda_6_806.raw	1	1	541	548			PEAKS DB
10	A0A1S2YEC8|A0A1S2YEC8_CICAR	K.DYFDGKEPNK.G	N	46.19	1211.55	10	6	606.78	2	51.55	2738100	1	17906	Banda_6_806.raw	1	1	383	392			PEAKS DB
10	A0A1S2YEC8|A0A1S2YEC8_CICAR	K.AM(+15.99)DDAGLQK.N	N	45.34	963.433	9	0	482.724	2	31.56	5886900	1	8414	Banda_6_806.raw	2	2	351	359	Oxidation (M)	M2:Oxidation (M):1000.00	PEAKS DB
14	A0A1S2YEC3|A0A1S2YEC3_CICAR	R.DAVVTVPAYFNDAQR.Q	N	88.83	1664.82	15	17	833.417	2	49.71	9775600	1	16575	Banda_6_806.raw	1	1	173	187			PEAKS DB
14	A0A1S2YEC3|A0A1S2YEC3_CICAR	R.IINEPTAAAIAYGLDK.K	N	84.09	1658.89	16	17	830.453	2	53.49	35181000	1	18909	Banda_6_806.raw	2	2	204	219			PEAKS DB
14	A0A1S2YEC3|A0A1S2YEC3_CICAR	R.IINEPTAAAIAYGLDKK.G	N	78.26	1786.98	17	19	596.669	3	54.68	43492000	1	19220	Banda_6_806.raw	2	2	204	220			PEAKS DB
14	A0A1S2YEC3|A0A1S2YEC3_CICAR	K.NQIDEIVLVGGSTR.I	N	70.8	1499.79	14	8	750.905	2	52.12	6737500	1	17956	Banda_6_806.raw	1	1	360	373			PEAKS DB
14	A0A1S2YEC3|A0A1S2YEC3_CICAR	K.VFSPEEISAM(+15.99)ILTK.M	N	67.23	1579.82	14	10	790.916	2	55.41	3970700	1	19605	Banda_6_806.raw	1	1	145	158	Oxidation (M)	M10:Oxidation (M):1000.00	PEAKS DB
14	A0A1S2YEC3|A0A1S2YEC3_CICAR	R.ITPSWVAFTDSER.L	N	67.04	1507.73	13	9	754.873	2	54.48	6987300	1	19187	Banda_6_806.raw	1	1	68	80			PEAKS DB
14	A0A1S2YEC3|A0A1S2YEC3_CICAR	R.LLGNFELTGIPPAPR.G	Y	59.17	1593.89	15	8	797.952	2	55.25	1361700	1	19563	Banda_6_806.raw	1	1	486	500			PEAKS DB
14	A0A1S2YEC3|A0A1S2YEC3_CICAR	K.DAGVIAGLNVAR.I	N	52.96	1154.64	12	1	578.328	2	48.32	11671000	1	15993	Banda_6_806.raw	1	1	192	203			PEAKS DB
14	A0A1S2YEC3|A0A1S2YEC3_CICAR	K.NGHVEIIANDQGNR.I	N	51.3	1535.74	14	-4	512.922	3	52	2813600	1	17624	Banda_6_806.raw	1	1	54	67			PEAKS DB
14	A0A1S2YEC3|A0A1S2YEC3_CICAR	H.VEIIANDQGNR.I	N	49.38	1227.62	11	13	614.818	2	36.47	51315000	1	10434	Banda_6_806.raw	1	1	57	67			PEAKS DB
14	A0A1S2YEC3|A0A1S2YEC3_CICAR	R.LSQEEIDR.M	N	46.42	988.482	8	11	495.249	2	34.93	18054000	1	9813	Banda_6_806.raw	1	1	541	548			PEAKS DB
14	A0A1S2YEC3|A0A1S2YEC3_CICAR	K.DYFDGKEPNK.G	N	46.19	1211.55	10	6	606.78	2	51.55	2738100	1	17906	Banda_6_806.raw	1	1	383	392			PEAKS DB
14	A0A1S2YEC3|A0A1S2YEC3_CICAR	K.AM(+15.99)DDAGLQK.N	N	45.34	963.433	9	0	482.724	2	31.56	5886900	1	8414	Banda_6_806.raw	2	2	351	359	Oxidation (M)	M2:Oxidation (M):1000.00	PEAKS DB
14	A0A1S2YEC3|A0A1S2YEC3_CICAR	R.VEIESLFDGVDFSEPLTR.A	Y	42.92	2052.01	18	12	1027.01	2	57	572120	1	20744	Banda_6_806.raw	1	1	313	330			PEAKS DB
27	A0A1S2YP37|A0A1S2YP37_CICAR	K.NAVVTVPAYFNDSQR.Q	N	93.27	1679.83	15	15	840.922	2	49.92	37098000	1	16733	Banda_6_806.raw	2	2	144	158			PEAKS DB
27	A0A1S2YP37|A0A1S2YP37_CICAR	K.ATAGDTHLGGEDFDNR.M	N	89.08	1674.72	16	8	838.37	2	51.9	5977600	1	17888	Banda_6_806.raw	1	1	226	241			PEAKS DB
27	A0A1S2YP37|A0A1S2YP37_CICAR	R.IINEPTAAAIAYGLDK.K	N	84.09	1658.89	16	17	830.453	2	53.49	35181000	1	18909	Banda_6_806.raw	2	2	175	190			PEAKS DB
27	A0A1S2YP37|A0A1S2YP37_CICAR	R.IINEPTAAAIAYGLDKK.A	N	78.26	1786.98	17	19	596.669	3	54.68	43492000	1	19220	Banda_6_806.raw	2	2	175	191			PEAKS DB
27	A0A1S2YP37|A0A1S2YP37_CICAR	R.TTPSYVAFTDTER.L	N	75.51	1486.69	13	11	744.355	2	46.51	32469000	1	15315	Banda_6_806.raw	1	1	39	51			PEAKS DB
27	A0A1S2YP37|A0A1S2YP37_CICAR	R.FEELNM(+15.99)DLFR.K	N	53.22	1328.61	10	0	665.311	2	54.14	3775500	1	18959	Banda_6_806.raw	1	1	307	316	Oxidation (M)	M6:Oxidation (M):1000.00	PEAKS DB
27	A0A1S2YP37|A0A1S2YP37_CICAR	K.NQVAM(+15.99)NPQNTVFDAK.R	Y	51.76	1691.79	15	9	846.905	2	40.89	12355000	1	12463	Banda_6_806.raw	1	1	59	73	Oxidation (M)	M5:Oxidation (M):1000.00	PEAKS DB
27	A0A1S2YP37|A0A1S2YP37_CICAR	R.FEELNMDLFR.K	N	49.26	1312.61	10	7	657.314	2	55.85	547210	1	20060	Banda_6_806.raw	1	1	307	316			PEAKS DB
22	A0A3Q7YAD4|A0A3Q7YAD4_CICAR	K.SNLDPTIYGDQTSK.I	Y	85.38	1537.73	14	13	769.871	2	38.45	1216000	1	11603	Banda_6_806.raw	1	1	391	404			PEAKS DB
22	A0A3Q7YAD4|A0A3Q7YAD4_CICAR	R.DTM(+15.99)NINALAR.Q	N	65.25	1133.55	10	13	567.783	2	36.61	11965000	1	10733	Banda_6_806.raw	1	1	555	564	Oxidation (M)	M3:Oxidation (M):1000.00	PEAKS DB
22	A0A3Q7YAD4|A0A3Q7YAD4_CICAR	K.NWVFPDQALPNDLIK.R	Y	64.23	1768.91	15	14	885.466	2	56.15	2954200	1	20026	Banda_6_806.raw	1	1	594	608			PEAKS DB
22	A0A3Q7YAD4|A0A3Q7YAD4_CICAR	K.LPLDVISTISPLPVIK.E	Y	62.45	1704.04	16	6	853.03	2	57.32	9888100	1	20514	Banda_6_806.raw	1	1	321	336			PEAKS DB
22	A0A3Q7YAD4|A0A3Q7YAD4_CICAR	R.QSLINADGIIEK.T	Y	62.18	1299.7	12	8	650.86	2	49.96	5332700	1	16754	Banda_6_806.raw	1	1	565	576			PEAKS DB
22	A0A3Q7YAD4|A0A3Q7YAD4_CICAR	K.SEKPATEVYVPR.D	Y	57.59	1374.71	12	13	459.246	3	52.87	10029000	1	18677	Banda_6_806.raw	1	1	253	264			PEAKS DB
22	A0A3Q7YAD4|A0A3Q7YAD4_CICAR	K.EVVEEGHGDLK.D	Y	57.2	1210.58	11	3	606.299	2	51.62	1131900	1	17773	Banda_6_806.raw	1	1	672	682			PEAKS DB
22	A0A3Q7YAD4|A0A3Q7YAD4_CICAR	K.YGVEM(+15.99)SSAVYK.N	Y	54.41	1248.57	11	4	625.292	2	36.77	3478300	1	10912	Banda_6_806.raw	1	1	583	593	Oxidation (M)	M5:Oxidation (M):1000.00	PEAKS DB
22	A0A3Q7YAD4|A0A3Q7YAD4_CICAR	R.TDGEQVLK.F	N	49.26	888.455	8	-11	445.234	2	35.44	17114000	1	10078	Banda_6_806.raw	1	1	341	348			PEAKS DB
22	A0A3Q7YAD4|A0A3Q7YAD4_CICAR	R.Q(-17.03)SLINADGIIEK.T	Y	49.12	1282.68	12	15	642.347	2	43.95	4683400	1	14290	Banda_6_806.raw	1	1	565	576	Pyro-glu from Q	Q1:Pyro-glu from Q:1000.00	PEAKS DB
22	A0A3Q7YAD4|A0A3Q7YAD4_CICAR	R.SVSLQLISATK.S	N	47.44	1145.67	11	12	573.841	2	52.54	7446500	1	18289	Banda_6_806.raw	1	1	65	75			PEAKS DB
22	A0A3Q7YAD4|A0A3Q7YAD4_CICAR	R.HASDEVYLGER.E	N	46.44	1274.59	11	-5	425.87	3	53.08	978720	1	18450	Banda_6_806.raw	1	1	778	788			PEAKS DB
22	A0A3Q7YAD4|A0A3Q7YAD4_CICAR	K.ITADVM(+15.99)ELDGC(+57.02)TIEEALASGR.L	Y	46.02	2266.05	21	2	1134.03	2	54.18	11430	1	19083	Banda_6_806.raw	1	1	405	425	Oxidation (M); Carbamidomethylation	M6:Oxidation (M):1000.00;C11:Carbamidomethylation:1000.00	PEAKS DB
22	A0A3Q7YAD4|A0A3Q7YAD4_CICAR	K.TYLPSETPSPLVK.Y	Y	43.47	1430.77	13	4	716.39	2	48.3	3861300	1	16334	Banda_6_806.raw	1	1	170	182			PEAKS DB
22	A0A3Q7YAD4|A0A3Q7YAD4_CICAR	K.DSSSPYGLR.L	Y	42.61	980.456	9	3	491.236	2	36.79	8160600	1	10680	Banda_6_806.raw	1	1	615	623			PEAKS DB
20	A0A1S2XQR4|A0A1S2XQR4_CICAR	R.Q(-17.03)SHFANAQPQQK.D	N	69.26	1365.64	12	2	683.829	2	33.9	1317400	1	9168	Banda_6_806.raw	1	1	426	437	Pyro-glu from Q	Q1:Pyro-glu from Q:1000.00	PEAKS DB
20	A0A1S2XQR4|A0A1S2XQR4_CICAR	F.SLSGSENQQSYFQGFSK.K	Y	69.1	1892.85	17	19	947.436	2	48.33	178800	1	16035	Banda_6_806.raw	1	1	158	174			PEAKS DB
20	A0A1S2XQR4|A0A1S2XQR4_CICAR	K.ILEASFNSDYEEIER.V	N	68.93	1813.84	15	2	907.926	2	52.16	5006400	1	17904	Banda_6_806.raw	1	1	176	190			PEAKS DB
20	A0A1S2XQR4|A0A1S2XQR4_CICAR	K.EVAFPGSAEEVDR.L	N	65.84	1404.65	13	9	703.334	2	44.16	9197700	1	14151	Banda_6_806.raw	1	1	407	419			PEAKS DB
20	A0A1S2XQR4|A0A1S2XQR4_CICAR	R.AILTVLNPNDR.N	N	58.4	1224.68	11	7	613.349	2	53.69	49854000	1	19086	Banda_6_806.raw	1	1	99	109			PEAKS DB
20	A0A1S2XQR4|A0A1S2XQR4_CICAR	R.Q(-17.03)EADVIVK.I	N	57.48	883.465	8	12	884.473	1	32.75	1034900	1	8879	Banda_6_806.raw	1	1	215	222	Pyro-glu from Q	Q1:Pyro-glu from Q:1000.00	PEAKS DB
20	A0A1S2XQR4|A0A1S2XQR4_CICAR	K.LPAGTIAYLANR.D	N	56.03	1258.7	12	10	630.36	2	53.23	4922300	1	18330	Banda_6_806.raw	2	2	122	133			PEAKS DB
20	A0A1S2XQR4|A0A1S2XQR4_CICAR	R.EQIEELSK.N	N	54.33	974.492	8	2	975.5	1	35.93	99012000	1	10385	Banda_6_806.raw	2	2	226	233			PEAKS DB
20	A0A1S2XQR4|A0A1S2XQR4_CICAR	N.FFEITPEK.N	N	52.16	1009.51	8	7	1010.52	1	53.27	53919000	1	18526	Banda_6_806.raw	2	2	266	273			PEAKS DB
20	A0A1S2XQR4|A0A1S2XQR4_CICAR	R.ATVILVVNEGK.G	N	48.04	1141.67	11	12	571.843	2	48.16	3312100	1	16092	Banda_6_806.raw	1	1	303	313			PEAKS DB
20	A0A1S2XQR4|A0A1S2XQR4_CICAR	R.NPIYSNK.Y	N	45.76	834.423	7	12	835.432	1	35.19	1186700	1	10175	Banda_6_806.raw	1	1	256	262			PEAKS DB
20	A0A1S2XQR4|A0A1S2XQR4_CICAR	R.SRNPIYSNK.Y	N	44.15	1077.56	9	0	539.786	2	52.48	9536400	1	18345	Banda_6_806.raw	1	1	254	262			PEAKS DB
23	A0A1S2XQ88|A0A1S2XQ88_CICAR	R.Q(-17.03)SHFANAQPQQK.R	N	69.26	1365.64	12	2	683.829	2	33.9	1317400	1	9168	Banda_6_806.raw	1	1	424	435	Pyro-glu from Q	Q1:Pyro-glu from Q:1000.00	PEAKS DB
23	A0A1S2XQ88|A0A1S2XQ88_CICAR	K.ILEASFNSDYEEIER.V	N	68.93	1813.84	15	2	907.926	2	52.16	5006400	1	17904	Banda_6_806.raw	1	1	176	190			PEAKS DB
23	A0A1S2XQ88|A0A1S2XQ88_CICAR	K.EVAFPGSAEEVDR.L	N	65.84	1404.65	13	9	703.334	2	44.16	9197700	1	14151	Banda_6_806.raw	1	1	405	417			PEAKS DB
23	A0A1S2XQ88|A0A1S2XQ88_CICAR	R.AILTVLNPNDR.N	N	58.4	1224.68	11	7	613.349	2	53.69	49854000	1	19086	Banda_6_806.raw	1	1	99	109			PEAKS DB
23	A0A1S2XQ88|A0A1S2XQ88_CICAR	K.LPAGTIAYLANR.D	N	56.03	1258.7	12	10	630.36	2	53.23	4922300	1	18330	Banda_6_806.raw	2	2	122	133			PEAKS DB
23	A0A1S2XQ88|A0A1S2XQ88_CICAR	R.EQIEELSK.N	N	54.33	974.492	8	2	975.5	1	35.93	99012000	1	10385	Banda_6_806.raw	2	2	224	231			PEAKS DB
23	A0A1S2XQ88|A0A1S2XQ88_CICAR	N.FFEITPEK.N	N	52.16	1009.51	8	7	1010.52	1	53.27	53919000	1	18526	Banda_6_806.raw	2	2	264	271			PEAKS DB
23	A0A1S2XQ88|A0A1S2XQ88_CICAR	R.VLLEEQEQKPEQR.R	Y	49.67	1624.84	13	7	542.622	3	52.75	2175800	1	18256	Banda_6_806.raw	1	1	191	203			PEAKS DB
23	A0A1S2XQ88|A0A1S2XQ88_CICAR	R.ATVILVVNEGK.G	N	48.04	1141.67	11	12	571.843	2	48.16	3312100	1	16092	Banda_6_806.raw	1	1	301	311			PEAKS DB
24	A0A1S2XSB9|A0A1S2XSB9_CICAR	R.IESEGGLIETWNPNNR.Q	Y	77.34	1827.88	16	15	914.946	2	52.37	4238500	1	18315	Banda_6_806.raw	1	1	45	60			PEAKS DB
24	A0A1S2XSB9|A0A1S2XSB9_CICAR	R.FYLAGNQEQEFLQYQQQEGR.K	Y	68.57	2475.15	20	-9	1238.58	2	52.58	596860	1	18053	Banda_6_806.raw	1	1	181	200			PEAKS DB
24	A0A1S2XSB9|A0A1S2XSB9_CICAR	K.SSNPFTFLVPPR.E	Y	61.47	1360.71	12	-20	681.363	2	55.9	2366300	1	20037	Banda_6_806.raw	1	1	499	510			PEAKS DB
24	A0A1S2XSB9|A0A1S2XSB9_CICAR	K.TVTSFDLPALR.W	N	55.46	1218.66	11	2	610.338	2	54.48	12063000	1	19544	Banda_6_806.raw	1	1	366	376			PEAKS DB
24	A0A1S2XSB9|A0A1S2XSB9_CICAR	K.EEQENEGNNIFSGFR.R	Y	49.28	1768.77	15	12	885.391	2	52.63	0	1	18229	Banda_6_806.raw	0	0	202	216			PEAKS DB
24	A0A1S2XSB9|A0A1S2XSB9_CICAR	R.LHQNIDSSSSPDIYIPQAGR.I	Y	48.92	2197.08	20	22	733.368	3	53.25	3155900	1	18852	Banda_6_806.raw	1	1	344	363			PEAKS DB
24	A0A1S2XSB9|A0A1S2XSB9_CICAR	R.DFLEDALNVNR.H	N	48.59	1304.64	11	4	653.326	2	54.93	10833000	1	19855	Banda_6_806.raw	1	1	218	228			PEAKS DB
24	A0A1S2XSB9|A0A1S2XSB9_CICAR	K.GGLSFISPSEK.Q	Y	47.82	1120.58	11	0	561.295	2	51.79	10835000	1	17726	Banda_6_806.raw	1	1	251	261			PEAKS DB
24	A0A1S2XSB9|A0A1S2XSB9_CICAR	R.C(+57.02)AGVALSR.A	N	47.42	832.423	8	3	417.219	2	36.23	4879700	1	10428	Banda_6_806.raw	1	1	64	71	Carbamidomethylation	C1:Carbamidomethylation:1000.00	PEAKS DB
26	A0A1S2YDV8|A0A1S2YDV8_CICAR	K.SESQNDPPEFGAAADGDADR.N	Y	74.93	2047.84	20	23	1024.93	2	36.25	1245600	1	10599	Banda_6_806.raw	1	1	286	305			PEAKS DB
26	A0A1S2YDV8|A0A1S2YDV8_CICAR	R.YYSEQAIQIITK.M	Y	60.85	1455.76	12	2	728.888	2	52.23	6275100	1	18127	Banda_6_806.raw	1	1	66	77			PEAKS DB
26	A0A1S2YDV8|A0A1S2YDV8_CICAR	R.SM(+15.99)PTSAALDVVAK.H	Y	57.91	1304.66	13	4	653.34	2	41.03	6189800	1	12760	Banda_6_806.raw	1	1	345	357	Oxidation (M)	M2:Oxidation (M):1000.00	PEAKS DB
26	A0A1S2YDV8|A0A1S2YDV8_CICAR	R.YDYENVDAGAAK.E	Y	54.47	1314.57	12	18	658.295	2	35.71	7715400	1	10244	Banda_6_806.raw	1	1	447	458			PEAKS DB
26	A0A1S2YDV8|A0A1S2YDV8_CICAR	R.GATLVVSGDGR.Y	Y	52.97	1030.54	11	12	516.278	2	36.61	9505600	1	10543	Banda_6_806.raw	1	1	55	65			PEAKS DB
26	A0A1S2YDV8|A0A1S2YDV8_CICAR	K.FFEVPTGWK.F	Y	52.63	1109.55	9	-2	555.784	2	55.17	1999300	1	19534	Banda_6_806.raw	1	1	363	371			PEAKS DB
26	A0A1S2YDV8|A0A1S2YDV8_CICAR	R.LSGTGSEGATIR.L	Y	51.08	1147.58	12	-6	574.799	2	35.35	10967000	1	9987	Banda_6_806.raw	1	1	524	535			PEAKS DB
26	A0A1S2YDV8|A0A1S2YDV8_CICAR	K.LQSSLSEANQIIK.G	Y	46.59	1429.78	13	6	715.896	2	46.52	7641500	1	15192	Banda_6_806.raw	1	1	467	479			PEAKS DB
28	A0A1S2XBN2|A0A1S2XBN2_CICAR	M(+15.99)(+42.01)FSGVTGLLNR.G	Y	72.39	1251.63	11	7	626.822	2	49.17	2172200	1	16394	Banda_6_806.raw	1	1	1	11	Oxidation (M); Acetylation (Protein N-term)	M1:Oxidation (M):1000.00;M1:Acetylation (Protein N-term):1000.00	PEAKS DB
28	A0A1S2XBN2|A0A1S2XBN2_CICAR	K.DWVFTEQALPNDLVK.R	Y	69.68	1773.89	15	12	887.955	2	55.44	1795800	1	19681	Banda_6_806.raw	1	1	596	610			PEAKS DB
28	A0A1S2XBN2|A0A1S2XBN2_CICAR	R.DTM(+15.99)NINALAR.Q	N	65.25	1133.55	10	13	567.783	2	36.61	11965000	1	10733	Banda_6_806.raw	1	1	557	566	Oxidation (M)	M3:Oxidation (M):1000.00	PEAKS DB
28	A0A1S2XBN2|A0A1S2XBN2_CICAR	K.EHLEPNLEGLTVEEAIQNK.K	Y	51.42	2162.09	19	6	721.703	3	54.7	157300	1	19408	Banda_6_806.raw	1	1	408	426			PEAKS DB
28	A0A1S2XBN2|A0A1S2XBN2_CICAR	R.TDGEQVLK.Y	N	49.26	888.455	8	-11	445.234	2	35.44	17114000	1	10078	Banda_6_806.raw	1	1	341	348			PEAKS DB
28	A0A1S2XBN2|A0A1S2XBN2_CICAR	R.SVSLQLISATK.S	N	47.44	1145.67	11	12	573.841	2	52.54	7446500	1	18289	Banda_6_806.raw	1	1	60	70			PEAKS DB
28	A0A1S2XBN2|A0A1S2XBN2_CICAR	R.SDFVYLPR.D	Y	45.9	995.508	8	2	498.761	2	53.37	4604400	1	18554	Banda_6_806.raw	1	1	256	263			PEAKS DB
28	A0A1S2XBN2|A0A1S2XBN2_CICAR	K.LPTDIISK.I	N	42.77	885.517	8	3	443.766	2	44.65	9275900	1	14188	Banda_6_806.raw	1	1	321	328			PEAKS DB
37	sp|Q9SMJ4|LEG_CICAR	R.YQQEGSEEEENEGGNIFSGFK.R	Y	80.51	2377	21	-2	1189.51	2	52.03	526600	1	17757	Banda_6_806.raw	1	1	194	214			PEAKS DB
37	sp|Q9SMJ4|LEG_CICAR	R.LHQNIGSSSSPDIYNPQAGR.I	N	69.9	2140.03	20	6	714.351	3	52.12	6540600	1	18212	Banda_6_806.raw	1	1	322	341			PEAKS DB
37	sp|Q9SMJ4|LEG_CICAR	K.GNSVFDGELEAGR.A	N	56.39	1349.62	13	-2	675.818	2	46.88	0	1	15453	Banda_6_806.raw	0	0	400	412			PEAKS DB
37	sp|Q9SMJ4|LEG_CICAR	K.SEGGLIETWNPSNK.Q	N	56.08	1530.73	14	10	766.374	2	51.16	10182000	1	17384	Banda_6_806.raw	1	1	47	60			PEAKS DB
37	sp|Q9SMJ4|LEG_CICAR	R.DFLEDALNVNR.R	N	48.59	1304.64	11	4	653.326	2	54.93	10833000	1	19855	Banda_6_806.raw	1	1	216	226			PEAKS DB
37	sp|Q9SMJ4|LEG_CICAR	A.C(+57.02)AGVALSR.A	N	47.42	832.423	8	3	417.219	2	36.23	4879700	1	10428	Banda_6_806.raw	1	1	64	71	Carbamidomethylation	C1:Carbamidomethylation:1000.00	PEAKS DB
36	Q304D4|Q304D4_CICAR	R.Q(-17.03)SHFANAQPQQK.D	N	69.26	1365.64	12	2	683.829	2	33.9	1317400	1	9168	Banda_6_806.raw	1	1	424	435	Pyro-glu from Q	Q1:Pyro-glu from Q:1000.00	PEAKS DB
36	Q304D4|Q304D4_CICAR	K.EVAFPGSAEEVDR.L	N	65.84	1404.65	13	9	703.334	2	44.16	9197700	1	14151	Banda_6_806.raw	1	1	405	417			PEAKS DB
36	Q304D4|Q304D4_CICAR	R.QQSQSQSQQEADVIVK.I	Y	60.78	1801.88	16	20	901.949	2	35.36	1726800	1	10046	Banda_6_806.raw	1	1	205	220			PEAKS DB
36	Q304D4|Q304D4_CICAR	Q.Q(-17.03)EADVIVK.I	N	57.48	883.465	8	12	884.473	1	32.75	1034900	1	8879	Banda_6_806.raw	1	1	213	220	Pyro-glu from Q	Q1:Pyro-glu from Q:1000.00	PEAKS DB
36	Q304D4|Q304D4_CICAR	R.Q(-17.03)QSQSQSQQEADVIVK.I	Y	54.59	1784.85	16	13	893.435	2	30.32	161700	1	7563	Banda_6_806.raw	1	1	205	220	Pyro-glu from Q	Q1:Pyro-glu from Q:1000.00	PEAKS DB
36	Q304D4|Q304D4_CICAR	R.EQIEELSK.N	N	54.33	974.492	8	2	975.5	1	35.93	99012000	1	10385	Banda_6_806.raw	2	2	224	231			PEAKS DB
36	Q304D4|Q304D4_CICAR	N.FFEITPEK.N	N	52.16	1009.51	8	7	1010.52	1	53.27	53919000	1	18526	Banda_6_806.raw	2	2	264	271			PEAKS DB
36	Q304D4|Q304D4_CICAR	R.ATVILVVNEGK.G	N	48.04	1141.67	11	12	571.843	2	48.16	3312100	1	16092	Banda_6_806.raw	1	1	301	311			PEAKS DB
36	Q304D4|Q304D4_CICAR	R.NPIYSNK.Y	N	45.76	834.423	7	12	835.432	1	35.19	1186700	1	10175	Banda_6_806.raw	1	1	254	260			PEAKS DB
36	Q304D4|Q304D4_CICAR	R.SRNPIYSNK.Y	N	44.15	1077.56	9	0	539.786	2	52.48	9536400	1	18345	Banda_6_806.raw	1	1	252	260			PEAKS DB
25	A0A1S2YXU4|A0A1S2YXU4_CICAR	K.ALELDDEDISFLTNR.A	Y	65.1	1749.84	15	8	875.929	2	54.79	1471200	1	19321	Banda_6_806.raw	1	1	280	294			PEAKS DB
25	A0A1S2YXU4|A0A1S2YXU4_CICAR	R.SAAYASLQNYTDALSDAK.K	Y	64.36	1887.88	18	-2	944.95	2	51.66	1370200	1	17786	Banda_6_806.raw	1	1	43	60			PEAKS DB
25	A0A1S2YXU4|A0A1S2YXU4_CICAR	K.DYEPVIETYQK.A	Y	62.75	1383.66	11	4	692.835	2	41.74	4721600	1	12931	Banda_6_806.raw	2	2	348	358			PEAKS DB
25	A0A1S2YXU4|A0A1S2YXU4_CICAR	K.GNAAFSSGDFSSAIR.H	Y	56.08	1485.68	15	11	743.851	2	48.53	0	1	16231	Banda_6_806.raw	0	0	9	23			PEAKS DB
25	A0A1S2YXU4|A0A1S2YXU4_CICAR	K.GLEIDPNNEPLK.S	Y	54.29	1337.68	12	21	669.85	2	46.13	0	1	15092	Banda_6_806.raw	0	0	96	107			PEAKS DB
25	A0A1S2YXU4|A0A1S2YXU4_CICAR	R.VYLQQPDFVK.M	Y	50.38	1235.65	10	6	618.835	2	50.42	4172400	1	17068	Banda_6_806.raw	1	1	154	163			PEAKS DB
25	A0A1S2YXU4|A0A1S2YXU4_CICAR	K.ELEQQEYFDPNLADEEREK.G	Y	47.97	2381.07	19	23	794.698	3	53.14	806480	1	18419	Banda_6_806.raw	1	1	381	399			PEAKS DB
25	A0A1S2YXU4|A0A1S2YXU4_CICAR	R.QVLVDFQENPK.S	Y	46	1315.68	11	30	658.848	2	47.9	916870	1	16084	Banda_6_806.raw	1	1	545	555			PEAKS DB
35	A0A3Q7XNW1|A0A3Q7XNW1_CICAR	R.LHQNIGSSSSPDIYNPQAGR.I	N	69.9	2140.03	20	6	714.351	3	52.12	6540600	1	18212	Banda_6_806.raw	1	1	325	344			PEAKS DB
35	A0A3Q7XNW1|A0A3Q7XNW1_CICAR	K.FNSPFSFLVPPR.S	Y	61.39	1406.73	12	-13	704.374	2	57.25	893390	1	20499	Banda_6_806.raw	1	1	480	491			PEAKS DB
35	A0A3Q7XNW1|A0A3Q7XNW1_CICAR	K.GNSVFDGELEAGR.A	N	56.39	1349.62	13	-2	675.818	2	46.88	0	1	15453	Banda_6_806.raw	0	0	402	414			PEAKS DB
35	A0A3Q7XNW1|A0A3Q7XNW1_CICAR	K.SEGGLIETWNPSNK.Q	N	56.08	1530.73	14	10	766.374	2	51.16	10182000	1	17384	Banda_6_806.raw	1	1	47	60			PEAKS DB
35	A0A3Q7XNW1|A0A3Q7XNW1_CICAR	K.TVTSFDLPALR.F	N	55.46	1218.66	11	2	610.338	2	54.48	12063000	1	19544	Banda_6_806.raw	1	1	347	357			PEAKS DB
35	A0A3Q7XNW1|A0A3Q7XNW1_CICAR	R.DFLEDALNVNR.R	N	48.59	1304.64	11	4	653.326	2	54.93	10833000	1	19855	Banda_6_806.raw	1	1	219	229			PEAKS DB
35	A0A3Q7XNW1|A0A3Q7XNW1_CICAR	R.C(+57.02)AGVALSR.A	N	47.42	832.423	8	3	417.219	2	36.23	4879700	1	10428	Banda_6_806.raw	1	1	64	71	Carbamidomethylation	C1:Carbamidomethylation:1000.00	PEAKS DB
38	A0A1S2XYZ0|A0A1S2XYZ0_CICAR	K.ELAFPGSAQEVDR.L	Y	60.4	1417.68	13	19	709.851	2	47.93	2719800	1	15749	Banda_6_806.raw	1	1	514	526			PEAKS DB
38	A0A1S2XYZ0|A0A1S2XYZ0_CICAR	R.Q(-17.03)QSQEAEVIVK.V	Y	56.78	1240.63	11	-7	621.322	2	31.47	1919200	1	8482	Banda_6_806.raw	1	1	331	341	Pyro-glu from Q	Q1:Pyro-glu from Q:1000.00	PEAKS DB
38	A0A1S2XYZ0|A0A1S2XYZ0_CICAR	K.LPAGTIAYLANR.D	N	56.03	1258.7	12	10	630.36	2	53.23	4922300	1	18330	Banda_6_806.raw	2	2	247	258			PEAKS DB
38	A0A1S2XYZ0|A0A1S2XYZ0_CICAR	R.EQIEELSK.H	N	54.33	974.492	8	2	975.5	1	35.93	99012000	1	10385	Banda_6_806.raw	2	2	345	352			PEAKS DB
38	A0A1S2XYZ0|A0A1S2XYZ0_CICAR	R.IVDLAIPINTPAK.F	Y	52.79	1363.81	13	11	682.912	2	53.42	4700700	1	18940	Banda_6_806.raw	1	1	266	278			PEAKS DB
38	A0A1S2XYZ0|A0A1S2XYZ0_CICAR	R.E(-18.01)EEEETSSESQGR.R	Y	50.37	1477.58	13	13	739.798	2	18.14	10238	1	3500	Banda_6_806.raw	1	1	140	152	Pyro-glu from E	E1:Pyro-glu from E:1000.00	PEAKS DB
38	A0A1S2XYZ0|A0A1S2XYZ0_CICAR	R.Q(-17.03)SHFANAQSQGSQR.R	Y	47.3	1527.68	14	2	764.848	2	33.48	426950	1	9410	Banda_6_806.raw	1	1	533	546	Pyro-glu from Q	Q1:Pyro-glu from Q:1000.00	PEAKS DB
41	A0A1S2Z6C2|A0A1S2Z6C2_CICAR	R.EYVDSGETLEAC(+57.02)R.C	Y	64.78	1527.65	13	9	764.833	2	36.94	806860	1	11165	Banda_6_806.raw	1	1	296	308	Carbamidomethylation	C12:Carbamidomethylation:1000.00	PEAKS DB
41	A0A1S2Z6C2|A0A1S2Z6C2_CICAR	R.AVVDDILPPAFLAR.A	Y	55.1	1495.84	14	13	748.928	2	56.46	1837900	1	20163	Banda_6_806.raw	1	1	226	239			PEAKS DB
41	A0A1S2Z6C2|A0A1S2Z6C2_CICAR	R.LAEGLDDLALDIPSAK.V	Y	54.52	1639.87	16	18	820.942	2	54.43	2164500	1	19093	Banda_6_806.raw	1	1	365	380			PEAKS DB
41	A0A1S2Z6C2|A0A1S2Z6C2_CICAR	R.AVIDDVLAPLNLEEIGSR.L	Y	51.68	1923.03	18	-13	642.017	3	56.61	157170	1	20358	Banda_6_806.raw	1	1	524	541			PEAKS DB
41	A0A1S2Z6C2|A0A1S2Z6C2_CICAR	K.IASQNAENLSSSPK.S	Y	51	1444.72	14	10	723.366	2	33.36	1165800	1	9371	Banda_6_806.raw	1	1	18	31			PEAKS DB
39	A0A1S2YZW8|A0A1S2YZW8_CICAR	R.ESPDWQTLSEAR.K	Y	58.28	1417.65	12	14	709.832	2	46.98	3109100	1	15294	Banda_6_806.raw	1	1	211	222			PEAKS DB
39	A0A1S2YZW8|A0A1S2YZW8_CICAR	R.SAIEDVQADK.V	Y	55.31	1074.52	10	0	538.267	2	35.32	3770400	1	9965	Banda_6_806.raw	1	1	180	189			PEAKS DB
39	A0A1S2YZW8|A0A1S2YZW8_CICAR	K.APLEVFVQFR.G	Y	53.75	1204.66	10	11	603.338	2	55.78	1123300	1	20307	Banda_6_806.raw	1	1	763	772			PEAKS DB
39	A0A1S2YZW8|A0A1S2YZW8_CICAR	K.EIEGLPATALGLAAQSAVSK.G	Y	53.25	1925.05	20	12	963.532	2	54.82	175300	1	19343	Banda_6_806.raw	1	1	282	301			PEAKS DB
39	A0A1S2YZW8|A0A1S2YZW8_CICAR	R.ASSGDLDNTELIEQILK.L	Y	48.85	1844.94	17	17	923.477	2	55.6	3954200	1	19642	Banda_6_806.raw	1	1	346	362			PEAKS DB
39	A0A1S2YZW8|A0A1S2YZW8_CICAR	R.ETILALGGGK.A	Y	43.23	957.549	10	2	479.782	2	50.51	3718600	1	16931	Banda_6_806.raw	1	1	753	762			PEAKS DB
47	A0A1S2YJW2|A0A1S2YJW2_CICAR	R.ITPNQNIILTDIR.A	Y	57.23	1509.85	13	20	755.934	2	53.21	3442300	1	18370	Banda_6_806.raw	1	1	451	463			PEAKS DB
47	A0A1S2YJW2|A0A1S2YJW2_CICAR	R.NVVEQYYGK.K	Y	54.89	1098.53	9	-2	550.274	2	41.41	439400	1	13293	Banda_6_806.raw	1	1	384	392			PEAKS DB
47	A0A1S2YJW2|A0A1S2YJW2_CICAR	R.IM(+15.99)SAEPPEVVQAR.N	Y	48.05	1441.72	13	18	721.87	2	36.62	2009600	1	10565	Banda_6_806.raw	1	1	240	252	Oxidation (M)	M2:Oxidation (M):1000.00	PEAKS DB
47	A0A1S2YJW2|A0A1S2YJW2_CICAR	K.EDILYAVK.A	Y	42.55	949.512	8	6	475.764	2	50.8	2077800	1	17494	Banda_6_806.raw	1	1	343	350			PEAKS DB
51	A0A1S2XV08|A0A1S2XV08_CICAR	R.QLEENLLLFDLVESK.L	Y	65.72	1788.95	15	-5	895.482	2	62.56	92336	1	22811	Banda_6_806.raw	1	1	402	416			PEAKS DB
51	A0A1S2XV08|A0A1S2XV08_CICAR	K.ATISIGSR.Q	Y	49.21	803.45	8	2	402.732	2	38.68	0	1	11604	Banda_6_806.raw	0	0	394	401			PEAKS DB
51	A0A1S2XV08|A0A1S2XV08_CICAR	K.LGFSNSLSSR.G	Y	47.42	1066.54	10	0	534.278	2	49.49	3637800	1	16719	Banda_6_806.raw	1	1	417	426			PEAKS DB
51	A0A1S2XV08|A0A1S2XV08_CICAR	K.EAQVNAVGPFGLC(+57.02)FDSK.R	Y	46.43	1837.87	17	13	919.942	2	54.53	402560	1	19389	Banda_6_806.raw	1	1	330	346	Carbamidomethylation	C13:Carbamidomethylation:1000.00	PEAKS DB
51	A0A1S2XV08|A0A1S2XV08_CICAR	K.AVNVEFVLDR.S	Y	43.31	1160.62	10	-4	581.317	2	54.1	488450	1	18955	Banda_6_806.raw	1	1	351	360			PEAKS DB
61	A0A1S2YQ71|A0A1S2YQ71_CICAR	K.EAFSLGLVDGLVSPDELVNAAR.Q	Y	60.17	2271.17	22	-2	1136.59	2	57.44	326650	1	20632	Banda_6_806.raw	2	2	174	195			PEAKS DB
61	A0A1S2YQ71|A0A1S2YQ71_CICAR	R.TSPQVIVDLLDISK.K	Y	43.25	1526.86	14	11	764.436	2	56.63	689370	1	20215	Banda_6_806.raw	1	1	465	478			PEAKS DB
77	A0A1S2Y5E7|A0A1S2Y5E7_CICAR	R.TDELGVPFAVTVDSTTSVTIR.E	Y	53.31	2207.13	21	29	1104.58	2	55.02	165930	1	19622	Banda_6_806.raw	1	1	654	674			PEAKS DB
77	A0A1S2Y5E7|A0A1S2Y5E7_CICAR	R.VFTPSVIEPSFGIGR.I	Y	47.56	1604.86	15	23	803.437	2	55.15	893410	1	19577	Banda_6_806.raw	1	1	559	573			PEAKS DB
79	A0A1S2XVG1|A0A1S2XVG1_CICAR	R.ATPAQVLANAFGLR.Q	Y	59.04	1427.79	14	14	714.903	2	57.96	1533400	1	20740	Banda_6_806.raw	1	1	494	507			PEAKS DB
79	A0A1S2XVG1|A0A1S2XVG1_CICAR	K.GVLGLSIPGC(+57.02)PTTFEEQR.Q	Y	55.5	1959.97	18	4	980.994	2	54.93	976620	1	19527	Banda_6_806.raw	1	1	103	120	Carbamidomethylation	C10:Carbamidomethylation:1000.00	PEAKS DB

## Sheet: 6
Protein ID	Protein Accession	Peptide	Unique	Score	Mass	Length	ppm	m/z	z	RT	Area Sample	Fraction	Scan	Source File	#Feature	#Feature Sample 1	Start	End	PTM	AScore	Found By
2	A0A1S2Y087|A0A1S2Y087_CICAR	R.NFLAGEDDNVISQIQNPVK.E	Y	101.23	2100.05	19	-5	1051.03	2	51.95	764610000	1	19317	Banda_7_824.raw	1	1	525	543			PEAKS DB
2	A0A1S2Y087|A0A1S2Y087_CICAR	K.KSESKEDEEESSSESQGR.R	Y	94.71	2026.86	18	7	1014.44	2	50.22	414620000	1	18005	Banda_7_824.raw	3	3	150	167			PEAKS DB
2	A0A1S2Y087|A0A1S2Y087_CICAR	K.SESKEDEEESSSESQGR.R	Y	94.31	1898.76	17	13	950.389	2	29.61	306470000	1	8134	Banda_7_824.raw	3	3	151	167			PEAKS DB
2	A0A1S2Y087|A0A1S2Y087_CICAR	R.QSYFANAQPQQR.E	Y	83.92	1436.68	12	14	719.348	2	36.25	412000000	1	11091	Banda_7_824.raw	4	4	563	574			PEAKS DB
2	A0A1S2Y087|A0A1S2Y087_CICAR	R.VLLEEQEPEQSR.G	Y	81.75	1455.72	12	19	728.869	2	38.47	304900000	1	12197	Banda_7_824.raw	3	3	331	342			PEAKS DB
2	A0A1S2Y087|A0A1S2Y087_CICAR	R.GSEESEEGDAIVK.V	Y	80.51	1348.6	13	9	675.308	2	23.42	1109200000	1	5306	Banda_7_824.raw	2	2	346	358			PEAKS DB
2	A0A1S2Y087|A0A1S2Y087_CICAR	K.ELTFPGSAQEVNR.L	Y	80.22	1446.71	13	22	724.364	2	46.41	1686500000	1	16163	Banda_7_824.raw	2	2	544	556			PEAKS DB
2	A0A1S2Y087|A0A1S2Y087_CICAR	R.NEQQEQQQEEDEEQEEEER.N	Y	79.7	2461.96	19	10	1231.99	2	20.31	229850000	1	4034	Banda_7_824.raw	3	3	459	477			PEAKS DB
2	A0A1S2Y087|A0A1S2Y087_CICAR	R.SNLFQNLQNYR.F	Y	77.84	1395.69	11	6	698.852	2	52.75	360860000	1	20002	Banda_7_824.raw	1	1	199	209			PEAKS DB
2	A0A1S2Y087|A0A1S2Y087_CICAR	K.EDEEESSSESQGR.R	Y	76.37	1467.56	13	15	734.788	2	17.79	4983800	1	3065	Banda_7_824.raw	1	1	155	167			PEAKS DB
2	A0A1S2Y087|A0A1S2Y087_CICAR	N.FLAGEDDNVISQIQNPVK.E	Y	75.33	1986.01	18	0	994.01	2	50.19	6759100	1	17841	Banda_7_824.raw	1	1	526	543			PEAKS DB
2	A0A1S2Y087|A0A1S2Y087_CICAR	R.Q(-17.03)SYFANAQPQQR.E	Y	72.81	1419.65	12	14	710.835	2	32.85	470650000	1	9666	Banda_7_824.raw	1	1	563	574	Pyro-glu from Q	Q1:Pyro-glu from Q:1000.00	PEAKS DB
2	A0A1S2Y087|A0A1S2Y087_CICAR	K.SILEASFNTK.Y	Y	72.69	1108.58	10	-2	1109.58	1	50.11	1647400000	1	18211	Banda_7_824.raw	2	2	315	324			PEAKS DB
2	A0A1S2Y087|A0A1S2Y087_CICAR	R.VVELAIPVNRPGK.F	Y	71.5	1390.83	13	-2	464.617	3	53.31	937710000	1	20054	Banda_7_824.raw	2	2	281	293			PEAKS DB
2	A0A1S2Y087|A0A1S2Y087_CICAR	K.E(-18.01)LTFPGSAQEVNR.L	Y	69.78	1428.7	13	30	715.359	2	41.27	32996000	1	13369	Banda_7_824.raw	1	1	544	556	Pyro-glu from E	E1:Pyro-glu from E:1000.00	PEAKS DB
2	A0A1S2Y087|A0A1S2Y087_CICAR	K.AILTVLNPNDR.N	N	67.32	1224.68	11	-6	1225.69	1	52.03	1495500000	1	19379	Banda_7_824.raw	4	4	239	249			PEAKS DB
2	A0A1S2Y087|A0A1S2Y087_CICAR	K.LPAGTTAYLANHDDEEDLR.V	Y	67.29	2099.98	19	37	701.002	3	51.99	591710000	1	19453	Banda_7_824.raw	1	1	262	280			PEAKS DB
2	A0A1S2Y087|A0A1S2Y087_CICAR	K.SISSESEPFNLR.S	Y	63.75	1364.66	12	6	1365.67	1	48.98	93710000	1	17514	Banda_7_824.raw	2	2	378	389			PEAKS DB
2	A0A1S2Y087|A0A1S2Y087_CICAR	F.LAGEDDNVISQIQNPVK.E	Y	63.27	1838.94	17	22	920.478	2	46.88	851440	1	16324	Banda_7_824.raw	1	1	527	543			PEAKS DB
2	A0A1S2Y087|A0A1S2Y087_CICAR	R.GDTIKLPAGTTAYLANHDDEEDLR.V	Y	63.05	2614.25	24	0	872.424	3	53.99	1069800	1	20412	Banda_7_824.raw	1	1	257	280			PEAKS DB
2	A0A1S2Y087|A0A1S2Y087_CICAR	R.REEEEYEER.S	Y	63.05	1267.53	9	13	634.774	2	48.23	126870000	1	16945	Banda_7_824.raw	2	2	56	64			PEAKS DB
2	A0A1S2Y087|A0A1S2Y087_CICAR	R.RGSEESEEGDAIVK.V	Y	62.55	1504.7	14	22	502.575	3	48.79	914680000	1	17237	Banda_7_824.raw	2	2	345	358			PEAKS DB
2	A0A1S2Y087|A0A1S2Y087_CICAR	R.QSYFANAQPQQREEESQ.R	Y	62.49	2038.9	17	12	1020.46	2	32.87	748100	1	9334	Banda_7_824.raw	2	2	563	579			PEAKS DB
2	A0A1S2Y087|A0A1S2Y087_CICAR	R.NPIYSNK.F	N	59.88	834.423	7	9	835.432	1	29.5	604360000	1	8095	Banda_7_824.raw	2	2	392	398			PEAKS DB
2	A0A1S2Y087|A0A1S2Y087_CICAR	R.EEEEDEEFR.E	Y	58.4	1210.46	9	12	606.239	2	30.56	18000	1	8553	Banda_7_824.raw	1	1	115	123			PEAKS DB
2	A0A1S2Y087|A0A1S2Y087_CICAR	R.NSFNLER.G	Y	56.94	878.425	7	18	879.433	1	42.42	1390200000	1	13913	Banda_7_824.raw	2	2	250	256			PEAKS DB
2	A0A1S2Y087|A0A1S2Y087_CICAR	K.FFEITPEK.S	N	56.71	1009.51	8	14	505.764	2	50.9	1657700000	1	18578	Banda_7_824.raw	2	2	402	409			PEAKS DB
2	A0A1S2Y087|A0A1S2Y087_CICAR	R.KSISSESEPFNLR.S	Y	56.4	1492.75	13	10	747.384	2	52.86	654320000	1	20020	Banda_7_824.raw	2	2	377	389			PEAKS DB
2	A0A1S2Y087|A0A1S2Y087_CICAR	R.SEHSVPGQR.E	Y	54.7	995.479	9	-1	498.747	2	46.24	277850000	1	15787	Banda_7_824.raw	1	1	65	73			PEAKS DB
2	A0A1S2Y087|A0A1S2Y087_CICAR	R.SRNPIYSNK.F	N	52.86	1077.56	9	10	539.786	2	49.46	305960000	1	17924	Banda_7_824.raw	1	1	390	398			PEAKS DB
2	A0A1S2Y087|A0A1S2Y087_CICAR	R.EEEEYEER.S	Y	52.6	1111.43	8	4	556.723	2	25.66	93618000	1	6457	Banda_7_824.raw	2	2	57	64			PEAKS DB
2	A0A1S2Y087|A0A1S2Y087_CICAR	Y.LANHDDEEDLR.V	Y	52.27	1325.58	11	15	663.801	2	48.94	25347000	1	17687	Banda_7_824.raw	1	1	270	280			PEAKS DB
2	A0A1S2Y087|A0A1S2Y087_CICAR	R.EQIEELSK.H	N	51.93	974.492	8	14	975.501	1	32.84	77377000	1	9618	Banda_7_824.raw	2	2	362	369			PEAKS DB
2	A0A1S2Y087|A0A1S2Y087_CICAR	R.E(-18.01)EEEDEEFR.E	Y	51.61	1192.45	9	-37	1193.45	1	29.61	89085	1	8052	Banda_7_824.raw	1	1	115	123	Pyro-glu from E	E1:Pyro-glu from E:1000.00	PEAKS DB
2	A0A1S2Y087|A0A1S2Y087_CICAR	R.Q(-17.03)SYFANAQPQQREEES.Q	Y	51	1893.81	16	6	947.914	2	33.1	2855500	1	9502	Banda_7_824.raw	1	1	563	578	Pyro-glu from Q	Q1:Pyro-glu from Q:1000.00	PEAKS DB
2	A0A1S2Y087|A0A1S2Y087_CICAR	R.AIVVLFINEGK.G	Y	50.51	1201.71	11	2	601.861	2	55.34	3807400	1	21015	Banda_7_824.raw	1	1	439	449			PEAKS DB
2	A0A1S2Y087|A0A1S2Y087_CICAR	R.GDTIKLPAGTTAY.L	Y	50.38	1306.68	13	8	654.346	2	46.58	3151000	1	16331	Banda_7_824.raw	1	1	257	269			PEAKS DB
2	A0A1S2Y087|A0A1S2Y087_CICAR	K.ELTFPGSAQEVNRL.I	Y	50.37	1559.79	14	2	780.905	2	51.5	17995000	1	19217	Banda_7_824.raw	1	1	544	557			PEAKS DB
2	A0A1S2Y087|A0A1S2Y087_CICAR	R.QSYFANAQPQQREEE.S	Y	48.88	1823.81	15	27	912.913	2	34.58	1550100	1	10428	Banda_7_824.raw	1	1	563	577			PEAKS DB
2	A0A1S2Y087|A0A1S2Y087_CICAR	R.QSYFANAQPQQREEES.Q	Y	47.8	1910.84	16	2	956.427	2	35.99	2529300	1	11188	Banda_7_824.raw	1	1	563	578			PEAKS DB
2	A0A1S2Y087|A0A1S2Y087_CICAR	R.QSYFANAQPQQREE.E	Y	46.75	1694.76	14	21	848.391	2	33.34	290670	1	9653	Banda_7_824.raw	1	1	563	576			PEAKS DB
2	A0A1S2Y087|A0A1S2Y087_CICAR	R.EREEDEQKQR.H	Y	46.65	1345.62	10	2	449.548	3	50.91	32239000	1	18883	Banda_7_824.raw	1	1	99	108			PEAKS DB
2	A0A1S2Y087|A0A1S2Y087_CICAR	R.E(sub Q)SYFANAQPQQR.E	Y	46.46	1437.66	12	-10	719.838	2	32.42	75933	1	9299	Banda_7_824.raw	1	1	563	574			SPIDER
2	A0A1S2Y087|A0A1S2Y087_CICAR	R.LLQNFDK.R	Y	46.32	876.471	7	16	877.479	1	47.1	14682000	1	16519	Banda_7_824.raw	1	1	191	197			PEAKS DB
2	A0A1S2Y087|A0A1S2Y087_CICAR	R.E(-18.01)QIEELSK.H	N	44.94	956.481	8	6	957.489	1	31.69	8997200	1	8761	Banda_7_824.raw	1	1	362	369	Pyro-glu from E	E1:Pyro-glu from E:1000.00	PEAKS DB
2	A0A1S2Y087|A0A1S2Y087_CICAR	F.GINAENNQR.N	Y	44.78	1014.48	9	-6	508.249	2	21.08	242200	1	4707	Banda_7_824.raw	2	2	516	524			PEAKS DB
8	A0A3Q7YAD4|A0A3Q7YAD4_CICAR	K.SNLDPTIYGDQTSK.I	Y	84.1	1537.73	14	9	769.871	2	37.32	15954000	1	11701	Banda_7_824.raw	1	1	391	404			PEAKS DB
8	A0A3Q7YAD4|A0A3Q7YAD4_CICAR	K.LPLDVISTISPLPVIK.E	Y	73.82	1704.04	16	9	853.03	2	57.2	18113000	1	21935	Banda_7_824.raw	2	2	321	336			PEAKS DB
8	A0A3Q7YAD4|A0A3Q7YAD4_CICAR	K.NWVFPDQALPNDLIK.R	Y	72.48	1768.91	15	7	885.465	2	55.76	3787700	1	21310	Banda_7_824.raw	1	1	594	608			PEAKS DB
8	A0A3Q7YAD4|A0A3Q7YAD4_CICAR	R.SVSLQLISATK.S	N	60.18	1145.67	11	7	573.841	2	50.06	25581000	1	17882	Banda_7_824.raw	1	1	65	75			PEAKS DB
8	A0A3Q7YAD4|A0A3Q7YAD4_CICAR	R.DTM(+15.99)NINALAR.Q	N	59.81	1133.55	10	4	567.783	2	34.18	18259000	1	9935	Banda_7_824.raw	1	1	555	564	Oxidation (M)	M3:Oxidation (M):1000.00	PEAKS DB
8	A0A3Q7YAD4|A0A3Q7YAD4_CICAR	R.LLPEQGTSQYEEM(+15.99)VK.S	Y	59.73	1766.84	15	4	884.427	2	38.84	8367100	1	12237	Banda_7_824.raw	1	1	735	749	Oxidation (M)	M13:Oxidation (M):1000.00	PEAKS DB
8	A0A3Q7YAD4|A0A3Q7YAD4_CICAR	R.HASDEVYLGER.E	N	57.84	1274.59	11	-6	425.87	3	50.87	1681500	1	18599	Banda_7_824.raw	1	1	778	788			PEAKS DB
8	A0A3Q7YAD4|A0A3Q7YAD4_CICAR	R.QSLINADGIIEK.T	Y	57.42	1299.7	12	17	650.86	2	48.69	5693600	1	17500	Banda_7_824.raw	1	1	565	576			PEAKS DB
8	A0A3Q7YAD4|A0A3Q7YAD4_CICAR	K.SEKPATEVYVPR.D	Y	56.06	1374.71	12	-8	459.245	3	50.66	9569600	1	18161	Banda_7_824.raw	1	1	253	264			PEAKS DB
8	A0A3Q7YAD4|A0A3Q7YAD4_CICAR	K.TYLPSETPSPLVK.Y	Y	54.74	1430.77	13	6	716.39	2	48.25	8400	1	17189	Banda_7_824.raw	1	1	170	182			PEAKS DB
8	A0A3Q7YAD4|A0A3Q7YAD4_CICAR	M(+15.99)(+42.01)FSGVTGILNK.G	Y	53.91	1223.62	11	2	612.818	2	46.06	515300	1	16037	Banda_7_824.raw	1	1	1	11	Oxidation (M); Acetylation (Protein N-term)	M1:Oxidation (M):1000.00;M1:Acetylation (Protein N-term):1000.00	PEAKS DB
8	A0A3Q7YAD4|A0A3Q7YAD4_CICAR	K.EVVEEGHGDLK.D	Y	52.57	1210.58	11	6	606.299	2	48.89	1534500	1	17239	Banda_7_824.raw	1	1	672	682			PEAKS DB
8	A0A3Q7YAD4|A0A3Q7YAD4_CICAR	K.YGVEM(+15.99)SSAVYK.N	Y	49.95	1248.57	11	17	625.293	2	35.45	3804200	1	10689	Banda_7_824.raw	1	1	583	593	Oxidation (M)	M5:Oxidation (M):1000.00	PEAKS DB
8	A0A3Q7YAD4|A0A3Q7YAD4_CICAR	R.Q(-17.03)SLINADGIIEK.T	Y	49.15	1282.68	12	24	642.347	2	43.65	5373100	1	14426	Banda_7_824.raw	1	1	565	576	Pyro-glu from Q	Q1:Pyro-glu from Q:1000.00	PEAKS DB
8	A0A3Q7YAD4|A0A3Q7YAD4_CICAR	R.TDGEQVLK.F	N	48.24	888.455	8	-10	445.235	2	22.15	2440900	1	4592	Banda_7_824.raw	1	1	341	348			PEAKS DB
8	A0A3Q7YAD4|A0A3Q7YAD4_CICAR	R.ENPHWTSDSK.A	Y	47.85	1199.52	10	19	600.769	2	48.95	866130	1	17240	Banda_7_824.raw	1	1	789	798			PEAKS DB
8	A0A3Q7YAD4|A0A3Q7YAD4_CICAR	R.KNVLDYNTIISIGGGNVR.G	Y	46.92	1932.04	18	14	645.023	3	54.58	339010	1	20821	Banda_7_824.raw	1	1	24	41			PEAKS DB
8	A0A3Q7YAD4|A0A3Q7YAD4_CICAR	R.Q(-17.03)LSVLHPIHK.L	Y	44.52	1153.66	10	12	577.838	2	53.99	627790	1	20313	Banda_7_824.raw	1	1	538	547	Pyro-glu from Q	Q1:Pyro-glu from Q:1000.00	PEAKS DB
7	A0A1S2XQR4|A0A1S2XQR4_CICAR	K.ILEASFNSDYEEIER.V	N	86.58	1813.84	15	5	907.926	2	49.71	31919000	1	17939	Banda_7_824.raw	1	1	176	190			PEAKS DB
7	A0A1S2XQR4|A0A1S2XQR4_CICAR	K.LPAGTIAYLANR.D	N	70.34	1258.7	12	10	630.36	2	51.12	26566000	1	18935	Banda_7_824.raw	2	2	122	133			PEAKS DB
7	A0A1S2XQR4|A0A1S2XQR4_CICAR	K.EVAFPGSAEEVDR.L	N	68.1	1404.65	13	23	703.335	2	43.58	6116600	1	14628	Banda_7_824.raw	1	1	407	419			PEAKS DB
7	A0A1S2XQR4|A0A1S2XQR4_CICAR	R.AILTVLNPNDR.N	N	67.32	1224.68	11	-6	1225.69	1	52.03	1495500000	1	19379	Banda_7_824.raw	4	4	99	109			PEAKS DB
7	A0A1S2XQR4|A0A1S2XQR4_CICAR	F.SLSGSENQQSYFQGFSK.K	Y	67.05	1892.85	17	13	947.436	2	47.74	13144000	1	16985	Banda_7_824.raw	1	1	158	174			PEAKS DB
7	A0A1S2XQR4|A0A1S2XQR4_CICAR	K.YGNFFEITPEK.N	N	64.41	1343.64	11	0	672.827	2	53.2	21608000	1	19753	Banda_7_824.raw	1	1	263	273			PEAKS DB
7	A0A1S2XQR4|A0A1S2XQR4_CICAR	R.NPIYSNK.Y	N	59.88	834.423	7	9	835.432	1	29.5	604360000	1	8095	Banda_7_824.raw	2	2	256	262			PEAKS DB
7	A0A1S2XQR4|A0A1S2XQR4_CICAR	R.ATVILVVNEGK.G	N	58.22	1141.67	11	10	571.843	2	48.02	14248000	1	17127	Banda_7_824.raw	1	1	303	313			PEAKS DB
7	A0A1S2XQR4|A0A1S2XQR4_CICAR	N.FFEITPEK.N	N	56.71	1009.51	8	14	505.764	2	50.9	1657700000	1	18578	Banda_7_824.raw	2	2	266	273			PEAKS DB
7	A0A1S2XQR4|A0A1S2XQR4_CICAR	R.SRNPIYSNK.Y	N	52.86	1077.56	9	10	539.786	2	49.46	305960000	1	17924	Banda_7_824.raw	1	1	254	262			PEAKS DB
7	A0A1S2XQR4|A0A1S2XQR4_CICAR	R.Q(-17.03)EADVIVK.I	N	52.25	883.465	8	2	884.472	1	31.87	10365000	1	8849	Banda_7_824.raw	2	2	215	222	Pyro-glu from Q	Q1:Pyro-glu from Q:1000.00	PEAKS DB
7	A0A1S2XQR4|A0A1S2XQR4_CICAR	R.EQIEELSK.N	N	51.93	974.492	8	14	975.501	1	32.84	77377000	1	9618	Banda_7_824.raw	2	2	226	233			PEAKS DB
7	A0A1S2XQR4|A0A1S2XQR4_CICAR	K.SNNFQTLFK.N	Y	51.73	1097.55	9	-4	549.782	2	51.66	35947000	1	19294	Banda_7_824.raw	1	1	35	43			PEAKS DB
7	A0A1S2XQR4|A0A1S2XQR4_CICAR	K.GEVELVGLR.N	N	50.26	970.545	9	0	486.28	2	49.84	24255000	1	17677	Banda_7_824.raw	1	1	314	322			PEAKS DB
7	A0A1S2XQR4|A0A1S2XQR4_CICAR	R.SVSSESEPFNLR.S	N	49.63	1350.64	12	16	676.329	2	47.43	55305000	1	16330	Banda_7_824.raw	1	1	242	253			PEAKS DB
7	A0A1S2XQR4|A0A1S2XQR4_CICAR	R.VLDLAIPVNRPGQFQSF.S	N	45.02	1900.02	17	11	951.019	2	55.44	5801300	1	21061	Banda_7_824.raw	1	1	141	157			PEAKS DB
7	A0A1S2XQR4|A0A1S2XQR4_CICAR	R.E(-18.01)QIEELSK.N	N	44.94	956.481	8	6	957.489	1	31.69	8997200	1	8761	Banda_7_824.raw	1	1	226	233	Pyro-glu from E	E1:Pyro-glu from E:1000.00	PEAKS DB
7	A0A1S2XQR4|A0A1S2XQR4_CICAR	K.KILEASFNSDYEEIER.V	N	44.38	1941.93	16	2	648.318	3	53.84	123700	1	20378	Banda_7_824.raw	1	1	175	190			PEAKS DB
6	A0A1S2XET4|A0A1S2XET4_CICAR	R.NQAQENAM(+15.99)EAISGAQER.Y	Y	77.53	1861.82	17	10	931.919	2	31.93	3516300	1	9166	Banda_7_824.raw	1	1	222	238	Oxidation (M)	M8:Oxidation (M):1000.00	PEAKS DB
6	A0A1S2XET4|A0A1S2XET4_CICAR	R.IQAQGPGNQVDQGR.G	Y	73.73	1466.72	14	10	734.369	2	26.86	12265000	1	6879	Banda_7_824.raw	1	1	475	488			PEAKS DB
6	A0A1S2XET4|A0A1S2XET4_CICAR	K.VIVVGEGDVEEK.Q	Y	70.44	1271.66	12	1	636.838	2	39.19	14858000	1	12533	Banda_7_824.raw	1	1	625	636			PEAKS DB
6	A0A1S2XET4|A0A1S2XET4_CICAR	R.GSNVVSSIGETVGK.L	Y	68.1	1332.69	14	19	667.353	2	43.24	15777000	1	14283	Banda_7_824.raw	1	1	489	502			PEAKS DB
6	A0A1S2XET4|A0A1S2XET4_CICAR	K.AAANVVEGAAR.Y	Y	65.1	1027.54	11	2	514.778	2	30.46	38835000	1	7919	Banda_7_824.raw	1	1	383	393			PEAKS DB
6	A0A1S2XET4|A0A1S2XET4_CICAR	K.TAAEYVSPVAEK.T	Y	64.09	1263.63	12	12	632.825	2	35.14	6883600	1	10757	Banda_7_824.raw	1	1	339	350			PEAKS DB
6	A0A1S2XET4|A0A1S2XET4_CICAR	K.GLAASAGESAK.E	Y	61.94	960.487	11	7	481.251	2	28.01	18245000	1	7479	Banda_7_824.raw	2	2	412	422			PEAKS DB
6	A0A1S2XET4|A0A1S2XET4_CICAR	K.KPTNETLTNTTQTAQGK.E	Y	58.15	1831.93	17	17	611.651	3	43.15	916600	1	14324	Banda_7_824.raw	1	1	244	260			PEAKS DB
6	A0A1S2XET4|A0A1S2XET4_CICAR	K.TELGTGQVVAEK.A	Y	54.88	1230.65	12	15	616.331	2	33.83	15067000	1	9936	Banda_7_824.raw	1	1	153	164			PEAKS DB
6	A0A1S2XET4|A0A1S2XET4_CICAR	R.DVGNFEVESK.G	Y	54.46	1122.52	10	5	562.267	2	35.81	12057000	1	10828	Banda_7_824.raw	1	1	111	120			PEAKS DB
6	A0A1S2XET4|A0A1S2XET4_CICAR	Q.AQGPGNQVDQGR.G	Y	53.44	1225.58	12	7	613.798	2	24.02	320920	1	5368	Banda_7_824.raw	1	1	477	488			PEAKS DB
6	A0A1S2XET4|A0A1S2XET4_CICAR	R.LGYGAENER.A	Y	52.12	1007.47	9	0	504.741	2	32.03	14428000	1	9130	Banda_7_824.raw	1	1	177	185			PEAKS DB
6	A0A1S2XET4|A0A1S2XET4_CICAR	K.GEQNFGTGR.L	Y	43.45	964.436	9	2	483.226	2	28.08	10176000	1	7482	Banda_7_824.raw	2	2	168	176			PEAKS DB
12	A0A1S2YX55|A0A1S2YX55_CICAR	M.A(+42.01)EPAYTVASDSETTGEEK.S	Y	98.95	1925.84	18	4	963.927	2	32.51	13408000	1	9197	Banda_7_824.raw	2	2	2	19	Acetylation (Protein N-term)	A1:Acetylation (Protein N-term):1000.00	PEAKS DB
12	A0A1S2YX55|A0A1S2YX55_CICAR	R.VATQDAIHQLSSQTSVQVDVDLGDGLK.I	Y	89.11	2823.43	27	15	942.15	3	53.06	9225200	1	20037	Banda_7_824.raw	1	1	296	322			PEAKS DB
12	A0A1S2YX55|A0A1S2YX55_CICAR	R.VDTDPVVHASK.N	Y	69.46	1166.59	11	4	584.304	2	47.83	3684600	1	16801	Banda_7_824.raw	1	1	100	110			PEAKS DB
12	A0A1S2YX55|A0A1S2YX55_CICAR	R.NVVLTVPVSFSR.F	Y	57.82	1316.75	12	15	659.381	2	52.91	17577000	1	19512	Banda_7_824.raw	1	1	165	176			PEAKS DB
12	A0A1S2YX55|A0A1S2YX55_CICAR	R.TYGATMDLVTLK.K	Y	54.24	1311.67	12	5	656.845	2	51.89	3468500	1	18968	Banda_7_824.raw	1	1	557	568			PEAKS DB
12	A0A1S2YX55|A0A1S2YX55_CICAR	R.VLAGVVM(+15.99)PGSR.E	Y	53.54	1100.6	11	14	551.309	2	41.21	17214000	1	13750	Banda_7_824.raw	1	1	519	529	Oxidation (M)	M7:Oxidation (M):1000.00	PEAKS DB
12	A0A1S2YX55|A0A1S2YX55_CICAR	R.AEFEEVNR.E	Y	53.02	992.456	8	0	497.235	2	33.77	19833000	1	9769	Banda_7_824.raw	1	1	330	337			PEAKS DB
12	A0A1S2YX55|A0A1S2YX55_CICAR	R.LM(+15.99)PEPTAVALLYGHQQQK.V	Y	48.17	2039.05	18	9	680.692	3	54.01	883800	1	20288	Banda_7_824.raw	1	1	196	213	Oxidation (M)	M2:Oxidation (M):1000.00	PEAKS DB
9	A0A1S2XQ88|A0A1S2XQ88_CICAR	K.ILEASFNSDYEEIER.V	N	86.58	1813.84	15	5	907.926	2	49.71	31919000	1	17939	Banda_7_824.raw	1	1	176	190			PEAKS DB
9	A0A1S2XQ88|A0A1S2XQ88_CICAR	K.LPAGTIAYLANR.D	N	70.34	1258.7	12	10	630.36	2	51.12	26566000	1	18935	Banda_7_824.raw	2	2	122	133			PEAKS DB
9	A0A1S2XQ88|A0A1S2XQ88_CICAR	K.EVAFPGSAEEVDR.L	N	68.1	1404.65	13	23	703.335	2	43.58	6116600	1	14628	Banda_7_824.raw	1	1	405	417			PEAKS DB
9	A0A1S2XQ88|A0A1S2XQ88_CICAR	R.AILTVLNPNDR.N	N	67.32	1224.68	11	-6	1225.69	1	52.03	1495500000	1	19379	Banda_7_824.raw	4	4	99	109			PEAKS DB
9	A0A1S2XQ88|A0A1S2XQ88_CICAR	R.ATVILVVNEGK.G	N	58.22	1141.67	11	10	571.843	2	48.02	14248000	1	17127	Banda_7_824.raw	1	1	301	311			PEAKS DB
9	A0A1S2XQ88|A0A1S2XQ88_CICAR	N.FFEITPEK.N	N	56.71	1009.51	8	14	505.764	2	50.9	1657700000	1	18578	Banda_7_824.raw	2	2	264	271			PEAKS DB
9	A0A1S2XQ88|A0A1S2XQ88_CICAR	R.VLLEEQEQKPEQR.R	Y	54.37	1624.84	13	-31	813.426	2	50.44	92587	1	18356	Banda_7_824.raw	2	2	191	203			PEAKS DB
9	A0A1S2XQ88|A0A1S2XQ88_CICAR	R.Q(-17.03)QSQETDVIVK.I	Y	52.05	1256.62	11	15	629.321	2	29.84	1911200	1	8077	Banda_7_824.raw	1	1	210	220	Pyro-glu from Q	Q1:Pyro-glu from Q:1000.00	PEAKS DB
9	A0A1S2XQ88|A0A1S2XQ88_CICAR	R.EQIEELSK.N	N	51.93	974.492	8	14	975.501	1	32.84	77377000	1	9618	Banda_7_824.raw	2	2	224	231			PEAKS DB
9	A0A1S2XQ88|A0A1S2XQ88_CICAR	K.GEVELVGLR.N	N	50.26	970.545	9	0	486.28	2	49.84	24255000	1	17677	Banda_7_824.raw	1	1	312	320			PEAKS DB
9	A0A1S2XQ88|A0A1S2XQ88_CICAR	K.SVSSESEPFNLR.S	N	49.63	1350.64	12	16	676.329	2	47.43	55305000	1	16330	Banda_7_824.raw	1	1	240	251			PEAKS DB
9	A0A1S2XQ88|A0A1S2XQ88_CICAR	R.VLDLAIPVNRPGQFQSF.S	N	45.02	1900.02	17	11	951.019	2	55.44	5801300	1	21061	Banda_7_824.raw	1	1	141	157			PEAKS DB
9	A0A1S2XQ88|A0A1S2XQ88_CICAR	R.E(-18.01)QIEELSK.N	N	44.94	956.481	8	6	957.489	1	31.69	8997200	1	8761	Banda_7_824.raw	1	1	224	231	Pyro-glu from E	E1:Pyro-glu from E:1000.00	PEAKS DB
9	A0A1S2XQ88|A0A1S2XQ88_CICAR	K.KILEASFNSDYEEIER.V	N	44.38	1941.93	16	2	648.318	3	53.84	123700	1	20378	Banda_7_824.raw	1	1	175	190			PEAKS DB
24	Q304D4|Q304D4_CICAR	R.QQSQSQSQQEADVIVK.I	Y	93.44	1801.88	16	11	901.949	2	31.58	14731000	1	8795	Banda_7_824.raw	1	1	205	220			PEAKS DB
24	Q304D4|Q304D4_CICAR	R.Q(-17.03)QSQSQSQQEADVIVK.I	Y	68.21	1784.85	16	17	893.436	2	29.77	12961000	1	8051	Banda_7_824.raw	1	1	205	220	Pyro-glu from Q	Q1:Pyro-glu from Q:1000.00	PEAKS DB
24	Q304D4|Q304D4_CICAR	K.EVAFPGSAEEVDR.L	N	68.1	1404.65	13	23	703.335	2	43.58	6116600	1	14628	Banda_7_824.raw	1	1	405	417			PEAKS DB
24	Q304D4|Q304D4_CICAR	K.YGNFFEITPEK.N	N	64.41	1343.64	11	0	672.827	2	53.2	21608000	1	19753	Banda_7_824.raw	1	1	261	271			PEAKS DB
24	Q304D4|Q304D4_CICAR	R.NPIYSNK.Y	N	59.88	834.423	7	9	835.432	1	29.5	604360000	1	8095	Banda_7_824.raw	2	2	254	260			PEAKS DB
24	Q304D4|Q304D4_CICAR	R.ATVILVVNEGK.G	N	58.22	1141.67	11	10	571.843	2	48.02	14248000	1	17127	Banda_7_824.raw	1	1	301	311			PEAKS DB
24	Q304D4|Q304D4_CICAR	N.FFEITPEK.N	N	56.71	1009.51	8	14	505.764	2	50.9	1657700000	1	18578	Banda_7_824.raw	2	2	264	271			PEAKS DB
24	Q304D4|Q304D4_CICAR	R.SRNPIYSNK.Y	N	52.86	1077.56	9	10	539.786	2	49.46	305960000	1	17924	Banda_7_824.raw	1	1	252	260			PEAKS DB
24	Q304D4|Q304D4_CICAR	Q.Q(-17.03)EADVIVK.I	N	52.25	883.465	8	2	884.472	1	31.87	10365000	1	8849	Banda_7_824.raw	2	2	213	220	Pyro-glu from Q	Q1:Pyro-glu from Q:1000.00	PEAKS DB
24	Q304D4|Q304D4_CICAR	R.EQIEELSK.N	N	51.93	974.492	8	14	975.501	1	32.84	77377000	1	9618	Banda_7_824.raw	2	2	224	231			PEAKS DB
24	Q304D4|Q304D4_CICAR	K.GEVELVGLR.N	N	50.26	970.545	9	0	486.28	2	49.84	24255000	1	17677	Banda_7_824.raw	1	1	312	320			PEAKS DB
24	Q304D4|Q304D4_CICAR	K.SVSSESEPFNLR.S	N	49.63	1350.64	12	16	676.329	2	47.43	55305000	1	16330	Banda_7_824.raw	1	1	240	251			PEAKS DB
24	Q304D4|Q304D4_CICAR	R.E(-18.01)QIEELSK.N	N	44.94	956.481	8	6	957.489	1	31.69	8997200	1	8761	Banda_7_824.raw	1	1	224	231	Pyro-glu from E	E1:Pyro-glu from E:1000.00	PEAKS DB
11	A0A1S2XSB9|A0A1S2XSB9_CICAR	R.IESEGGLIETWNPNNR.Q	Y	79.42	1827.88	16	9	914.946	2	50.11	13663000	1	18252	Banda_7_824.raw	1	1	45	60			PEAKS DB
11	A0A1S2XSB9|A0A1S2XSB9_CICAR	R.DFLEDALNVNR.H	N	73.83	1304.64	11	8	653.326	2	53.99	26516000	1	20706	Banda_7_824.raw	1	1	218	228			PEAKS DB
11	A0A1S2XSB9|A0A1S2XSB9_CICAR	R.KEEQENEGNNIFSGFR.R	Y	68.31	1896.86	16	-1	633.294	3	53.84	704500	1	20285	Banda_7_824.raw	1	1	201	216			PEAKS DB
11	A0A1S2XSB9|A0A1S2XSB9_CICAR	K.EEQENEGNNIFSGFR.R	Y	65.06	1768.77	15	5	885.39	2	50.22	1930400	1	18520	Banda_7_824.raw	1	1	202	216			PEAKS DB
11	A0A1S2XSB9|A0A1S2XSB9_CICAR	K.TVTSFDLPALR.W	N	59.77	1218.66	11	-10	610.337	2	53.45	38965000	1	20325	Banda_7_824.raw	1	1	366	376			PEAKS DB
11	A0A1S2XSB9|A0A1S2XSB9_CICAR	R.LHQNIDSSSSPDIYIPQAGR.I	Y	57.52	2197.08	20	-12	733.365	3	51.16	7983600	1	18562	Banda_7_824.raw	2	2	344	363			PEAKS DB
11	A0A1S2XSB9|A0A1S2XSB9_CICAR	R.FYLAGNQEQEFLQYQQQEGR.K	Y	56.62	2475.15	20	18	1238.58	2	50.93	1227200	1	18688	Banda_7_824.raw	1	1	181	200			PEAKS DB
11	A0A1S2XSB9|A0A1S2XSB9_CICAR	K.GGLSFISPSEK.Q	Y	49.23	1120.58	11	-12	561.295	2	49.43	29824000	1	17490	Banda_7_824.raw	1	1	251	261			PEAKS DB
11	A0A1S2XSB9|A0A1S2XSB9_CICAR	R.FSYVAFK.T	N	48.59	860.443	7	-1	431.229	2	51.3	25759000	1	18803	Banda_7_824.raw	1	1	452	458			PEAKS DB
11	A0A1S2XSB9|A0A1S2XSB9_CICAR	R.Q(-17.03)DEDEDEKR.R	N	44.54	1145.45	9	10	573.731	2	17.79	1740300	1	3075	Banda_7_824.raw	1	1	291	299	Pyro-glu from Q	Q1:Pyro-glu from Q:1000.00	PEAKS DB
11	A0A1S2XSB9|A0A1S2XSB9_CICAR	R.QEEDEDEDEDEK.R	Y	43.26	1508.53	12	15	755.272	2	18.71	6334.3	1	3411	Banda_7_824.raw	1	1	271	282			PEAKS DB
10	A0A1S2YDV8|A0A1S2YDV8_CICAR	K.SESQNDPPEFGAAADGDADR.N	Y	75.41	2047.84	20	11	1024.93	2	32.24	3955200	1	9413	Banda_7_824.raw	2	2	286	305			PEAKS DB
10	A0A1S2YDV8|A0A1S2YDV8_CICAR	R.YDYENVDAGAAK.E	Y	68.73	1314.57	12	5	658.294	2	32.13	17531000	1	9267	Banda_7_824.raw	1	1	447	458			PEAKS DB
10	A0A1S2YDV8|A0A1S2YDV8_CICAR	K.LQSSLSEANQIIK.G	Y	66.34	1429.78	13	13	715.897	2	46.04	17816000	1	15610	Banda_7_824.raw	1	1	467	479			PEAKS DB
10	A0A1S2YDV8|A0A1S2YDV8_CICAR	D.PPEFGAAADGDADR.N	Y	64.78	1387.6	14	4	694.808	2	35.19	657690	1	10522	Banda_7_824.raw	1	1	292	305			PEAKS DB
10	A0A1S2YDV8|A0A1S2YDV8_CICAR	R.SM(+15.99)PTSAALDVVAK.H	Y	62.29	1304.66	13	10	653.34	2	40.05	12136000	1	12861	Banda_7_824.raw	1	1	345	357	Oxidation (M)	M2:Oxidation (M):1000.00	PEAKS DB
10	A0A1S2YDV8|A0A1S2YDV8_CICAR	R.LSGTGSEGATIR.L	Y	59.72	1147.58	12	1	574.799	2	31.21	22131000	1	8459	Banda_7_824.raw	1	1	524	535			PEAKS DB
10	A0A1S2YDV8|A0A1S2YDV8_CICAR	K.FFEVPTGWK.F	N	59.37	1109.55	9	6	555.785	2	54.52	4702200	1	20687	Banda_7_824.raw	1	1	363	371			PEAKS DB
10	A0A1S2YDV8|A0A1S2YDV8_CICAR	R.GATLVVSGDGR.Y	Y	58.72	1030.54	11	12	516.278	2	34.34	19701000	1	10663	Banda_7_824.raw	1	1	55	65			PEAKS DB
10	A0A1S2YDV8|A0A1S2YDV8_CICAR	R.IETTPFDGQKPGTSGLR.K	Y	49.51	1802.92	17	9	601.98	3	51.68	14435000	1	19155	Banda_7_824.raw	1	1	9	25			PEAKS DB
10	A0A1S2YDV8|A0A1S2YDV8_CICAR	R.YYSEQAIQIITK.M	Y	48.81	1455.76	12	8	728.888	2	49.91	15044000	1	18187	Banda_7_824.raw	1	1	66	77			PEAKS DB
10	A0A1S2YDV8|A0A1S2YDV8_CICAR	K.ATGAFILTASHNPGGPNEDFGIK.Y	Y	47.17	2313.14	23	13	772.055	3	54.34	6891700	1	21060	Banda_7_824.raw	1	1	115	137			PEAKS DB
10	A0A1S2YDV8|A0A1S2YDV8_CICAR	R.IFVDELGAQESSLLNC(+57.02)IPK.E	Y	45.86	2132.08	19	5	1067.05	2	55.27	644210	1	21130	Banda_7_824.raw	1	1	241	259	Carbamidomethylation	C16:Carbamidomethylation:1000.00	PEAKS DB
10	A0A1S2YDV8|A0A1S2YDV8_CICAR	K.LVTVEDIVR.Q	Y	43.31	1042.6	9	-1	522.308	2	51.55	18459000	1	19146	Banda_7_824.raw	1	1	425	433			PEAKS DB
28	sp|Q9SMJ4|LEG_CICAR	R.YQQEGSEEEENEGGNIFSGFK.R	Y	88.35	2377	21	16	1189.51	2	49.99	20295000	1	18128	Banda_7_824.raw	2	2	194	214			PEAKS DB
28	sp|Q9SMJ4|LEG_CICAR	R.LHQNIGSSSSPDIYNPQAGR.I	N	77.04	2140.03	20	23	714.352	3	49.56	25061000	1	17638	Banda_7_824.raw	2	2	322	341			PEAKS DB
28	sp|Q9SMJ4|LEG_CICAR	R.DFLEDALNVNR.R	N	73.83	1304.64	11	8	653.326	2	53.99	26516000	1	20706	Banda_7_824.raw	1	1	216	226			PEAKS DB
28	sp|Q9SMJ4|LEG_CICAR	K.GNSVFDGELEAGR.A	N	62.23	1349.62	13	6	675.818	2	46.01	0	1	15822	Banda_7_824.raw	0	0	400	412			PEAKS DB
28	sp|Q9SMJ4|LEG_CICAR	K.SEGGLIETWNPSNK.Q	N	61.78	1530.73	14	20	766.375	2	49.34	21069000	1	17813	Banda_7_824.raw	1	1	47	60			PEAKS DB
28	sp|Q9SMJ4|LEG_CICAR	R.FSYVAFK.T	N	48.59	860.443	7	-1	431.229	2	51.3	25759000	1	18803	Banda_7_824.raw	1	1	431	437			PEAKS DB
28	sp|Q9SMJ4|LEG_CICAR	R.Q(-17.03)DEDEDEKR.Q	N	44.54	1145.45	9	10	573.731	2	17.79	1740300	1	3075	Banda_7_824.raw	1	1	287	295	Pyro-glu from Q	Q1:Pyro-glu from Q:1000.00	PEAKS DB
13	A0A3Q7XNW1|A0A3Q7XNW1_CICAR	R.LHQNIGSSSSPDIYNPQAGR.I	N	77.04	2140.03	20	23	714.352	3	49.56	25061000	1	17638	Banda_7_824.raw	2	2	325	344			PEAKS DB
13	A0A3Q7XNW1|A0A3Q7XNW1_CICAR	R.DFLEDALNVNR.R	N	73.83	1304.64	11	8	653.326	2	53.99	26516000	1	20706	Banda_7_824.raw	1	1	219	229			PEAKS DB
13	A0A3Q7XNW1|A0A3Q7XNW1_CICAR	K.FNSPFSFLVPPR.S	Y	67.85	1406.73	12	-1	704.375	2	57	3299500	1	21857	Banda_7_824.raw	2	2	480	491			PEAKS DB
13	A0A3Q7XNW1|A0A3Q7XNW1_CICAR	K.GNSVFDGELEAGR.A	N	62.23	1349.62	13	6	675.818	2	46.01	0	1	15822	Banda_7_824.raw	0	0	402	414			PEAKS DB
13	A0A3Q7XNW1|A0A3Q7XNW1_CICAR	K.SEGGLIETWNPSNK.Q	N	61.78	1530.73	14	20	766.375	2	49.34	21069000	1	17813	Banda_7_824.raw	1	1	47	60			PEAKS DB
13	A0A3Q7XNW1|A0A3Q7XNW1_CICAR	K.TVTSFDLPALR.F	N	59.77	1218.66	11	-10	610.337	2	53.45	38965000	1	20325	Banda_7_824.raw	1	1	347	357			PEAKS DB
13	A0A3Q7XNW1|A0A3Q7XNW1_CICAR	R.FSYVAFK.T	N	48.59	860.443	7	-1	431.229	2	51.3	25759000	1	18803	Banda_7_824.raw	1	1	433	439			PEAKS DB
13	A0A3Q7XNW1|A0A3Q7XNW1_CICAR	R.Q(-17.03)DEDEDEKR.Q	N	44.54	1145.45	9	10	573.731	2	17.79	1740300	1	3075	Banda_7_824.raw	1	1	290	298	Pyro-glu from Q	Q1:Pyro-glu from Q:1000.00	PEAKS DB
22	A0A1S2XBN2|A0A1S2XBN2_CICAR	M(+15.99)(+42.01)FSGVTGLLNR.G	Y	81.92	1251.63	11	7	626.822	2	49.14	6473100	1	17556	Banda_7_824.raw	1	1	1	11	Oxidation (M); Acetylation (Protein N-term)	M1:Oxidation (M):1000.00;M1:Acetylation (Protein N-term):1000.00	PEAKS DB
22	A0A1S2XBN2|A0A1S2XBN2_CICAR	R.QSLVNDGGIIEK.T	Y	62.38	1271.67	12	-27	636.842	2	41.87	10681000	1	13852	Banda_7_824.raw	2	2	567	578			PEAKS DB
22	A0A1S2XBN2|A0A1S2XBN2_CICAR	R.SVSLQLISATK.S	N	60.18	1145.67	11	7	573.841	2	50.06	25581000	1	17882	Banda_7_824.raw	1	1	60	70			PEAKS DB
22	A0A1S2XBN2|A0A1S2XBN2_CICAR	R.DTM(+15.99)NINALAR.Q	N	59.81	1133.55	10	4	567.783	2	34.18	18259000	1	9935	Banda_7_824.raw	1	1	557	566	Oxidation (M)	M3:Oxidation (M):1000.00	PEAKS DB
22	A0A1S2XBN2|A0A1S2XBN2_CICAR	R.TILFFSDDK.T	Y	56.71	1084.54	9	10	543.28	2	54.74	9258900	1	20668	Banda_7_824.raw	1	1	456	464			PEAKS DB
22	A0A1S2XBN2|A0A1S2XBN2_CICAR	R.TDGEQVLK.Y	N	48.24	888.455	8	-10	445.235	2	22.15	2440900	1	4592	Banda_7_824.raw	1	1	341	348			PEAKS DB
22	A0A1S2XBN2|A0A1S2XBN2_CICAR	K.DWVFTEQALPNDLVK.R	Y	47.05	1773.89	15	14	887.955	2	54.95	4511500	1	20788	Banda_7_824.raw	1	1	596	610			PEAKS DB
22	A0A1S2XBN2|A0A1S2XBN2_CICAR	K.SSDFLTYALK.A	Y	44.88	1143.58	10	1	572.798	2	53.37	8124900	1	19827	Banda_7_824.raw	1	1	272	281			PEAKS DB
16	A0A1S2XYZ0|A0A1S2XYZ0_CICAR	K.LPAGTIAYLANR.D	N	70.34	1258.7	12	10	630.36	2	51.12	26566000	1	18935	Banda_7_824.raw	2	2	247	258			PEAKS DB
16	A0A1S2XYZ0|A0A1S2XYZ0_CICAR	R.IVDLAIPINTPAK.F	Y	68.35	1363.81	13	11	682.912	2	51.55	12085000	1	18754	Banda_7_824.raw	1	1	266	278			PEAKS DB
16	A0A1S2XYZ0|A0A1S2XYZ0_CICAR	R.Q(-17.03)QSQEAEVIVK.V	Y	59.52	1240.63	11	4	621.322	2	30.81	4148100	1	8473	Banda_7_824.raw	2	2	331	341	Pyro-glu from Q	Q1:Pyro-glu from Q:1000.00	PEAKS DB
16	A0A1S2XYZ0|A0A1S2XYZ0_CICAR	R.NFLAGEDDNVISQIERPVK.E	Y	58.16	2143.09	19	10	715.372	3	54.71	1564900	1	20797	Banda_7_824.raw	1	1	495	513			PEAKS DB
16	A0A1S2XYZ0|A0A1S2XYZ0_CICAR	R.Q(-17.03)SHFANAQSQGSQR.R	Y	54.66	1527.68	14	18	764.849	2	28.71	861360	1	7843	Banda_7_824.raw	1	1	533	546	Pyro-glu from Q	Q1:Pyro-glu from Q:1000.00	PEAKS DB
16	A0A1S2XYZ0|A0A1S2XYZ0_CICAR	R.E(-18.01)EEEETSSESQGR.R	Y	53.94	1477.58	13	1	739.798	2	18.14	23074	1	3233	Banda_7_824.raw	1	1	140	152	Pyro-glu from E	E1:Pyro-glu from E:1000.00	PEAKS DB
16	A0A1S2XYZ0|A0A1S2XYZ0_CICAR	K.AILTVLNSNDR.N	Y	52.21	1214.66	11	-9	608.338	2	51.07	4894700	1	18481	Banda_7_824.raw	1	1	224	234			PEAKS DB
16	A0A1S2XYZ0|A0A1S2XYZ0_CICAR	R.EQIEELSK.H	N	51.93	974.492	8	14	975.501	1	32.84	77377000	1	9618	Banda_7_824.raw	2	2	345	352			PEAKS DB
16	A0A1S2XYZ0|A0A1S2XYZ0_CICAR	K.ELAFPGSAQEVDR.L	Y	48.51	1417.68	13	11	709.85	2	47.55	7609700	1	16705	Banda_7_824.raw	1	1	514	526			PEAKS DB
16	A0A1S2XYZ0|A0A1S2XYZ0_CICAR	K.GNFELVGLR.N	Y	45.18	1003.54	9	-6	502.779	2	52.67	5590500	1	19691	Banda_7_824.raw	1	1	433	441			PEAKS DB
16	A0A1S2XYZ0|A0A1S2XYZ0_CICAR	R.E(-18.01)QIEELSK.H	N	44.94	956.481	8	6	957.489	1	31.69	8997200	1	8761	Banda_7_824.raw	1	1	345	352	Pyro-glu from E	E1:Pyro-glu from E:1000.00	PEAKS DB
21	A0A076L2J5|A0A076L2J5_CICAR	K.GVNPDEAVAMGAALQGGILR.G	N	64.72	1938	20	22	970.009	2	54.46	1216300	1	20642	Banda_7_824.raw	2	2	416	435			PEAKS DB
21	A0A076L2J5|A0A076L2J5_CICAR	K.GVNPDEAVAM(+15.99)GAALQGGILR.G	N	62.36	1953.99	20	9	978.005	2	49.8	2549300	1	17959	Banda_7_824.raw	1	1	416	435	Oxidation (M)	M10:Oxidation (M):1000.00	PEAKS DB
21	A0A076L2J5|A0A076L2J5_CICAR	K.SQVFSTATENQTQVGVK.V	Y	61.07	1822.91	17	9	912.461	2	38.59	510700	1	12358	Banda_7_824.raw	1	1	475	491			PEAKS DB
21	A0A076L2J5|A0A076L2J5_CICAR	R.NSADTTIYSIEK.S	N	59.39	1340.65	12	15	671.331	2	39.41	2432700	1	13071	Banda_7_824.raw	2	2	589	600			PEAKS DB
21	A0A076L2J5|A0A076L2J5_CICAR	R.QAVTNPTNTLFGTK.R	Y	56.18	1490.77	14	22	746.395	2	47.19	3742500	1	16219	Banda_7_824.raw	1	1	115	128			PEAKS DB
21	A0A076L2J5|A0A076L2J5_CICAR	K.VQEVVSAIFGK.A	Y	54.25	1175.65	11	9	588.835	2	52.69	7906800	1	19838	Banda_7_824.raw	1	1	401	411			PEAKS DB
21	A0A076L2J5|A0A076L2J5_CICAR	R.SAM(+15.99)SGDNVDEIK.S	N	53.73	1280.56	12	18	641.286	2	28.3	2158300	1	7384	Banda_7_824.raw	1	1	626	637	Oxidation (M)	M3:Oxidation (M):1000.00	PEAKS DB
21	A0A076L2J5|A0A076L2J5_CICAR	R.TTPSVVAFNQK.G	N	53.15	1190.63	11	9	596.323	2	39.83	11143000	1	12773	Banda_7_824.raw	1	1	93	103			PEAKS DB
21	A0A076L2J5|A0A076L2J5_CICAR	K.AVVTVPAYFNDAQR.Q	N	51.42	1549.79	14	12	775.903	2	49.57	7873200	1	17471	Banda_7_824.raw	1	1	196	209			PEAKS DB
21	A0A076L2J5|A0A076L2J5_CICAR	K.GELLVGTPAK.R	N	50.95	983.565	10	16	492.791	2	43.84	7737800	1	14976	Banda_7_824.raw	1	1	104	113			PEAKS DB
21	A0A076L2J5|A0A076L2J5_CICAR	K.VIENSEGAR.T	N	49.88	973.483	9	5	487.749	2	25.42	0	1	6189	Banda_7_824.raw	0	0	84	92			PEAKS DB
21	A0A076L2J5|A0A076L2J5_CICAR	R.IINEPTAAALSYGMNNK.E	N	45.36	1805.9	17	1	903.956	2	48.07	233640	1	16671	Banda_7_824.raw	1	1	226	242			PEAKS DB
27	A0A1S2YI93|A0A1S2YI93_CICAR	K.GVNPDEAVAMGAALQGGILR.G	N	64.72	1938	20	22	970.009	2	54.46	1216300	1	20642	Banda_7_824.raw	2	2	408	427			PEAKS DB
27	A0A1S2YI93|A0A1S2YI93_CICAR	K.GVNPDEAVAM(+15.99)GAALQGGILR.G	N	62.36	1953.99	20	9	978.005	2	49.8	2549300	1	17959	Banda_7_824.raw	1	1	408	427	Oxidation (M)	M10:Oxidation (M):1000.00	PEAKS DB
27	A0A1S2YI93|A0A1S2YI93_CICAR	R.NSADTTIYSIEK.S	N	59.39	1340.65	12	15	671.331	2	39.41	2432700	1	13071	Banda_7_824.raw	2	2	581	592			PEAKS DB
27	A0A1S2YI93|A0A1S2YI93_CICAR	R.SAM(+15.99)SGDNVDEIK.S	N	53.73	1280.56	12	18	641.286	2	28.3	2158300	1	7384	Banda_7_824.raw	1	1	618	629	Oxidation (M)	M3:Oxidation (M):1000.00	PEAKS DB
27	A0A1S2YI93|A0A1S2YI93_CICAR	R.TTPSVVAFNQK.G	N	53.15	1190.63	11	9	596.323	2	39.83	11143000	1	12773	Banda_7_824.raw	1	1	85	95			PEAKS DB
27	A0A1S2YI93|A0A1S2YI93_CICAR	K.AVVTVPAYFNDAQR.Q	N	51.42	1549.79	14	12	775.903	2	49.57	7873200	1	17471	Banda_7_824.raw	1	1	188	201			PEAKS DB
27	A0A1S2YI93|A0A1S2YI93_CICAR	K.GELLVGTPAK.R	N	50.95	983.565	10	16	492.791	2	43.84	7737800	1	14976	Banda_7_824.raw	1	1	96	105			PEAKS DB
27	A0A1S2YI93|A0A1S2YI93_CICAR	K.VIENSEGAR.T	N	49.88	973.483	9	5	487.749	2	25.42	0	1	6189	Banda_7_824.raw	0	0	76	84			PEAKS DB
27	A0A1S2YI93|A0A1S2YI93_CICAR	R.IINEPTAAALSYGMNNK.E	N	45.36	1805.9	17	1	903.956	2	48.07	233640	1	16671	Banda_7_824.raw	1	1	218	234			PEAKS DB
27	A0A1S2YI93|A0A1S2YI93_CICAR	K.SQVFSTAIDNQTQVGIK.V	Y	43.34	1834.94	17	25	918.481	2	47.07	456520	1	16237	Banda_7_824.raw	1	1	467	483			PEAKS DB
23	A0A1S2YBR2|A0A1S2YBR2_CICAR	K.Q(-17.03)LAPILDEVAVSYQSDADVVIAK.L	Y	65.68	2426.26	23	19	809.761	3	60.94	324230	1	23806	Banda_7_824.raw	1	1	444	466	Pyro-glu from Q	Q1:Pyro-glu from Q:1000.00	PEAKS DB
23	A0A1S2YBR2|A0A1S2YBR2_CICAR	K.SEPIPETNNEPVK.V	Y	65.64	1452.71	13	7	727.362	2	30.76	4550500	1	8516	Banda_7_824.raw	1	1	400	412			PEAKS DB
23	A0A1S2YBR2|A0A1S2YBR2_CICAR	K.SADDASAFIGEK.S	Y	64.88	1209.55	12	11	605.784	2	39.03	8437400	1	12659	Banda_7_824.raw	1	1	184	195			PEAKS DB
23	A0A1S2YBR2|A0A1S2YBR2_CICAR	R.GDSSVSGPVVR.L	Y	55.01	1058.54	11	12	530.276	2	30.58	11076000	1	8092	Banda_7_824.raw	1	1	239	249			PEAKS DB
23	A0A1S2YBR2|A0A1S2YBR2_CICAR	K.QSGPASTEIK.S	Y	48.82	1016.51	10	-8	509.264	2	27.67	0	1	7248	Banda_7_824.raw	0	0	174	183			PEAKS DB
23	A0A1S2YBR2|A0A1S2YBR2_CICAR	K.EIATQYEVK.G	Y	48.45	1079.55	9	4	540.782	2	35.54	3549500	1	10832	Banda_7_824.raw	1	1	132	140			PEAKS DB
23	A0A1S2YBR2|A0A1S2YBR2_CICAR	K.Q(-17.03)SGPASTEIK.S	Y	44.22	999.487	10	11	500.752	2	24.67	1491400	1	5755	Banda_7_824.raw	1	1	174	183	Pyro-glu from Q	Q1:Pyro-glu from Q:1000.00	PEAKS DB
30	A0A1S2Y3E0|A0A1S2Y3E0_CICAR	R.VEFGDATTTADPSDEPSISR.S	Y	82.81	2093.94	20	3	1047.98	2	40.59	3443900	1	13474	Banda_7_824.raw	1	1	36	55			PEAKS DB
30	A0A1S2Y3E0|A0A1S2Y3E0_CICAR	M(+15.99)(+42.01)DSDYGIPR.E	Y	55.45	1110.47	9	6	1111.47	1	33.31	3388700	1	9589	Banda_7_824.raw	2	2	1	9	Oxidation (M); Acetylation (Protein N-term)	M1:Oxidation (M):1000.00;M1:Acetylation (Protein N-term):1000.00	PEAKS DB
30	A0A1S2Y3E0|A0A1S2Y3E0_CICAR	K.TLEITEDILSTYK.N	Y	53.89	1524.79	13	13	763.404	2	54.71	2722300	1	20888	Banda_7_824.raw	1	1	136	148			PEAKS DB
30	A0A1S2Y3E0|A0A1S2Y3E0_CICAR	R.TTEQVNAALAAC(+57.02)NDLK.L	Y	48.95	1717.83	16	15	859.924	2	41.4	270190	1	13554	Banda_7_824.raw	1	1	165	180	Carbamidomethylation	C12:Carbamidomethylation:1000.00	PEAKS DB
30	A0A1S2Y3E0|A0A1S2Y3E0_CICAR	K.VPDAQIITEHPPIR.V	Y	48.01	1584.86	14	13	793.439	2	52.58	98602	1	19628	Banda_7_824.raw	1	1	75	88			PEAKS DB
29	A0A1S2XV08|A0A1S2XV08_CICAR	R.Q(-17.03)LEENLLLFDLVESK.L	Y	60.67	1771.92	15	12	886.971	2	62.38	160900	1	24321	Banda_7_824.raw	1	1	402	416	Pyro-glu from Q	Q1:Pyro-glu from Q:1000.00	PEAKS DB
29	A0A1S2XV08|A0A1S2XV08_CICAR	K.NNPNILNNLIYTPLTITPEGEYR.M	Y	60.59	2658.37	23	10	887.13	3	56.43	2279300	1	21635	Banda_7_824.raw	1	1	246	268			PEAKS DB
29	A0A1S2XV08|A0A1S2XV08_CICAR	R.ISGENLM(+15.99)VEAK.S	Y	58.08	1205.6	11	13	603.806	2	34.2	0	1	10074	Banda_7_824.raw	0	0	367	377	Oxidation (M)	M7:Oxidation (M):1000.00	PEAKS DB
29	A0A1S2XV08|A0A1S2XV08_CICAR	R.TPLMQLPVLIDLNGK.H	Y	52.35	1650.94	15	30	826.479	2	56.9	0	1	21951	Banda_7_824.raw	0	0	64	78			PEAKS DB
29	A0A1S2XV08|A0A1S2XV08_CICAR	K.AVNVEFVLDR.S	Y	52.29	1160.62	10	7	581.317	2	52.55	487900	1	19825	Banda_7_824.raw	1	1	351	360			PEAKS DB
29	A0A1S2XV08|A0A1S2XV08_CICAR	K.EAQVNAVGPFGLC(+57.02)FDSK.R	Y	46.41	1837.87	17	9	919.942	2	53.18	1450200	1	19818	Banda_7_824.raw	1	1	330	346	Carbamidomethylation	C13:Carbamidomethylation:1000.00	PEAKS DB
29	A0A1S2XV08|A0A1S2XV08_CICAR	R.QLEENLLLFDLVESK.L	Y	43.82	1788.95	15	20	895.485	2	62.38	113910	1	24332	Banda_7_824.raw	1	1	402	416			PEAKS DB
29	A0A1S2XV08|A0A1S2XV08_CICAR	K.LGFSNSLSSR.G	Y	43.64	1066.54	10	-14	534.277	2	48.35	6213900	1	16756	Banda_7_824.raw	1	1	417	426			PEAKS DB
32	A0A1S2YIR6|A0A1S2YIR6_CICAR	R.SLGYGYVNYSNPQDAAR.A	Y	71.21	1873.86	17	-1	937.937	2	45.91	2758400	1	15607	Banda_7_824.raw	1	1	79	95			PEAKS DB
32	A0A1S2YIR6|A0A1S2YIR6_CICAR	K.NLDDSISDEK.L	Y	54.8	1134.5	10	5	568.26	2	31.74	2201600	1	9052	Banda_7_824.raw	1	1	327	336			PEAKS DB
32	A0A1S2YIR6|A0A1S2YIR6_CICAR	R.GSGFVAFSTPEEASR.A	Y	53	1540.72	15	28	771.367	2	49.03	2999500	1	17197	Banda_7_824.raw	1	1	362	376			PEAKS DB
32	A0A1S2YIR6|A0A1S2YIR6_CICAR	K.GYGFVQFDNEEAAQK.A	Y	49.26	1701.76	15	-12	851.888	2	49.39	2630600	1	17379	Banda_7_824.raw	1	1	168	182			PEAKS DB
32	A0A1S2YIR6|A0A1S2YIR6_CICAR	K.ELFSTFGAITSC(+57.02)K.V	Y	48.76	1459.7	13	10	730.859	2	54.17	393910	1	20451	Banda_7_824.raw	1	1	339	351	Carbamidomethylation	C12:Carbamidomethylation:1000.00	PEAKS DB
36	A0A1S2YZ56|A0A1S2YZ56_CICAR	K.LQTYNIFDNDPDFK.N	Y	64.2	1728.8	14	-11	865.406	2	53.12	9168100	1	20282	Banda_7_824.raw	1	1	290	303			PEAKS DB
36	A0A1S2YZ56|A0A1S2YZ56_CICAR	R.EQEEESEGEGEAKTEEEEEETESEGGR.R	Y	56.88	3041.19	27	11	1014.74	3	35.32	4363400	1	11027	Banda_7_824.raw	1	1	613	639			PEAKS DB
36	A0A1S2YZ56|A0A1S2YZ56_CICAR	R.E(-18.01)QEEESEGEGEAK.T	Y	52.05	1431.56	13	26	716.791	2	18.19	17308	1	3256	Banda_7_824.raw	1	1	613	625	Pyro-glu from E	E1:Pyro-glu from E:1000.00	PEAKS DB
36	A0A1S2YZ56|A0A1S2YZ56_CICAR	K.NSHGWTLTVTK.K	Y	47.69	1242.64	11	13	622.326	2	53.47	971450	1	20017	Banda_7_824.raw	1	1	304	314			PEAKS DB
36	A0A1S2YZ56|A0A1S2YZ56_CICAR	R.RTEEAESEEEAAR.R	Y	45.28	1505.66	13	24	502.895	3	43.63	7918600	1	14561	Banda_7_824.raw	1	1	587	599			PEAKS DB
36	A0A1S2YZ56|A0A1S2YZ56_CICAR	K.GSVLQILDK.Q	Y	44.15	971.565	9	9	486.79	2	53.96	16841000	1	20142	Banda_7_824.raw	1	1	423	431			PEAKS DB
36	A0A1S2YZ56|A0A1S2YZ56_CICAR	K.QGDVFLVPR.F	Y	43.98	1029.56	9	-9	515.787	2	51.19	11234000	1	18738	Banda_7_824.raw	1	1	380	388			PEAKS DB
36	A0A1S2YZ56|A0A1S2YZ56_CICAR	R.TEEAESEEEAAR.R	Y	43.69	1349.56	12	0	675.786	2	17.79	1364300	1	3093	Banda_7_824.raw	2	2	588	599			PEAKS DB
51	A0A1S2XVM2|A0A1S2XVM2_CICAR	K.EGSSIINTTSVNAYK.G	Y	70.06	1582.78	15	15	792.4	2	41.43	5965400	1	13578	Banda_7_824.raw	1	1	206	220			PEAKS DB
51	A0A1S2XVM2|A0A1S2XVM2_CICAR	K.IAVVTGGDSGIGR.S	Y	69.95	1200.65	13	3	601.331	2	40.64	9265500	1	13488	Banda_7_824.raw	2	2	75	87			PEAKS DB
51	A0A1S2XVM2|A0A1S2XVM2_CICAR	R.VVDEIINTYGR.I	Y	67.76	1277.66	11	12	639.839	2	47.85	7456600	1	16678	Banda_7_824.raw	1	1	147	157			PEAKS DB
51	A0A1S2XVM2|A0A1S2XVM2_CICAR	R.VNGVAPGPIWTPLIPSSFK.E	Y	65.04	1979.09	19	12	990.553	2	60.17	130590	1	23449	Banda_7_824.raw	1	1	253	271			PEAKS DB
34	A0A1S2Y2K5|A0A1S2Y2K5_CICAR	K.VAVFVGGVDTSATETK.G	Y	63.41	1579.81	16	9	790.913	2	46.35	3893100	1	16009	Banda_7_824.raw	1	1	242	257			PEAKS DB
34	A0A1S2Y2K5|A0A1S2Y2K5_CICAR	R.IVPGAAATEIELAK.R	Y	60.2	1381.78	14	9	691.899	2	49.08	4340700	1	17404	Banda_7_824.raw	1	1	411	424			PEAKS DB
34	A0A1S2Y2K5|A0A1S2Y2K5_CICAR	K.GTVLIHSAEQLENYSK.T	Y	59.76	1787.91	16	9	894.961	2	53.5	53964	1	20198	Banda_7_824.raw	1	1	258	273			PEAKS DB
34	A0A1S2Y2K5|A0A1S2Y2K5_CICAR	K.LFVTNDAATIVNELEVQHPAAK.I	Y	51.81	2379.24	22	17	794.09	3	55.6	385720	1	21282	Banda_7_824.raw	1	1	63	84			PEAKS DB
56	A0A3Q7YG68|A0A3Q7YG68_CICAR	R.AIAQSNSTEIADALFR.Y	Y	81.53	1705.86	16	2	853.939	2	53.84	979090	1	20236	Banda_7_824.raw	1	1	266	281			PEAKS DB
56	A0A3Q7YG68|A0A3Q7YG68_CICAR	R.AADELQALQEER.R	Y	63.59	1371.66	12	27	686.841	2	43.13	2056600	1	14496	Banda_7_824.raw	1	1	143	154			PEAKS DB
56	A0A3Q7YG68|A0A3Q7YG68_CICAR	K.IPELEFEIPPEAQR.G	Y	45.38	1666.86	14	-5	834.435	2	53.12	60460	1	19773	Banda_7_824.raw	1	1	117	130			PEAKS DB
56	A0A3Q7YG68|A0A3Q7YG68_CICAR	K.AAPETADAIDQFLVK.L	Y	43.88	1587.81	15	-3	794.914	2	53.18	1120700	1	19792	Banda_7_824.raw	1	1	157	171			PEAKS DB
37	A0A1S2XYQ5|A0A1S2XYQ5_CICAR	K.FNYSSGQPAPESITDK.I	Y	62.02	1739.8	16	-2	870.907	2	38.05	7120900	1	11793	Banda_7_824.raw	1	1	202	217			PEAKS DB
37	A0A1S2XYQ5|A0A1S2XYQ5_CICAR	P.FFEVPTGWK.F	N	59.37	1109.55	9	6	555.785	2	54.52	4702200	1	20687	Banda_7_824.raw	1	1	416	424			PEAKS DB
37	A0A1S2XYQ5|A0A1S2XYQ5_CICAR	K.IYGNTLSISEIK.I	Y	47.61	1336.72	12	14	669.37	2	49.84	5402800	1	17894	Banda_7_824.raw	1	1	218	229			PEAKS DB
37	A0A1S2XYQ5|A0A1S2XYQ5_CICAR	K.EGILSTPAVSAVIR.K	Y	45.6	1411.8	14	-1	706.909	2	53.23	7477400	1	20090	Banda_7_824.raw	1	1	162	175			PEAKS DB
37	A0A1S2XYQ5|A0A1S2XYQ5_CICAR	K.IADIPDVDLSNVGITK.F	Y	43.61	1668.89	16	14	835.455	2	50.89	8079200	1	18739	Banda_7_824.raw	1	1	230	245			PEAKS DB
40	A0A1S2XH76|A0A1S2XH76_CICAR	K.Q(-17.03)GNLHLNEDGTTISGDIR.N	Y	64.78	1921.91	18	9	961.965	2	45.49	1828100	1	15421	Banda_7_824.raw	2	2	253	270	Pyro-glu from Q	Q1:Pyro-glu from Q:1000.00	PEAKS DB
40	A0A1S2XH76|A0A1S2XH76_CICAR	R.YNDPFNDGAGSQGTFFGR.N	Y	52.94	1948.83	18	3	975.425	2	52.09	1139100	1	19057	Banda_7_824.raw	1	1	102	119			PEAKS DB
40	A0A1S2XH76|A0A1S2XH76_CICAR	K.EIPM(+15.99)NDLIGLQGENTLR.E	Y	46.24	1927.97	17	-8	964.99	2	49.8	2118500	1	17986	Banda_7_824.raw	1	1	420	436	Oxidation (M)	M4:Oxidation (M):1000.00	PEAKS DB
40	A0A1S2XH76|A0A1S2XH76_CICAR	R.DLVPHNVDGTER.S	Y	44.74	1350.65	12	-9	451.224	3	49.47	2923200	1	17545	Banda_7_824.raw	1	1	466	477			PEAKS DB
38	A0A1S2XPP7|A0A1S2XPP7_CICAR	K.SVGPIVDGDAVVTFNFR.A	Y	70.08	1791.92	17	10	896.966	2	54.71	3151700	1	20762	Banda_7_824.raw	1	1	270	286			PEAKS DB
38	A0A1S2XPP7|A0A1S2XPP7_CICAR	R.HYLVSPPEIDR.T	Y	51.74	1324.68	11	10	663.347	2	53.66	719890	1	20183	Banda_7_824.raw	1	1	330	340			PEAKS DB
38	A0A1S2XPP7|A0A1S2XPP7_CICAR	R.GWDAQVLGEAPYK.F	Y	48.73	1432.7	13	4	717.357	2	50.18	2378400	1	18103	Banda_7_824.raw	1	1	224	236			PEAKS DB
38	A0A1S2XPP7|A0A1S2XPP7_CICAR	K.ANDQYLPPFVIVDESGK.S	Y	44.55	1890.94	17	10	946.476	2	54.09	6831900	1	20265	Banda_7_824.raw	1	1	253	269			PEAKS DB
45	A0A1S3E1N3|A0A1S3E1N3_CICAR	R.ITTANSLTLPVLK.S	Y	74.87	1369.82	13	-52	685.913	2	52.91	598300	1	19837	Banda_7_824.raw	1	1	394	406			PEAKS DB
45	A0A1S3E1N3|A0A1S3E1N3_CICAR	R.ADVFNPR.A	Y	45.35	817.408	7	7	409.712	2	40.25	11116000	1	13065	Banda_7_824.raw	1	1	384	390			PEAKS DB
45	A0A1S3E1N3|A0A1S3E1N3_CICAR	R.VQVVNNEGK.S	Y	44.22	985.519	9	-7	493.767	2	26.01	8477600	1	6513	Banda_7_824.raw	1	1	444	452			PEAKS DB
52	A0A1S2XVG1|A0A1S2XVG1_CICAR	R.ATPAQVLANAFGLR.Q	Y	74.97	1427.79	14	6	714.902	2	57.62	5582900	1	22069	Banda_7_824.raw	2	2	494	507			PEAKS DB
52	A0A1S2XVG1|A0A1S2XVG1_CICAR	K.GVLGLSIPGC(+57.02)PTTFEEQR.Q	Y	60.37	1959.97	18	14	980.995	2	54.34	1817400	1	20551	Banda_7_824.raw	1	1	103	120	Carbamidomethylation	C10:Carbamidomethylation:1000.00	PEAKS DB
52	A0A1S2XVG1|A0A1S2XVG1_CICAR	R.ISTVNSLTLPILSYLR.L	Y	44.76	1789.03	16	6	895.525	2	58.45	738430	1	22529	Banda_7_824.raw	1	1	383	398			PEAKS DB
39	A0A1S2Y1Q1|A0A1S2Y1Q1_CICAR	K.SIEVSQILALDSR.Y	Y	62.7	1429.78	13	0	715.896	2	54	2500700	1	20583	Banda_7_824.raw	1	1	506	518			PEAKS DB
39	A0A1S2Y1Q1|A0A1S2Y1Q1_CICAR	R.LNIPAELTAVMAAR.H	Y	51.72	1468.81	14	10	735.412	2	56.59	188640	1	21714	Banda_7_824.raw	1	1	156	169			PEAKS DB
39	A0A1S2Y1Q1|A0A1S2Y1Q1_CICAR	R.MVFLTPTVIK.G	Y	50.84	1147.67	10	-95	574.836	2	55.04	1014100	1	20951	Banda_7_824.raw	1	1	281	290			PEAKS DB
39	A0A1S2Y1Q1|A0A1S2Y1Q1_CICAR	R.SPLDDDESFGFSTK.G	Y	49.9	1543.67	14	26	772.843	2	48.94	156300	1	17435	Banda_7_824.raw	1	1	175	188			PEAKS DB
39	A0A1S2Y1Q1|A0A1S2Y1Q1_CICAR	R.VYAEAVNQVLDSAAK.E	Y	44.37	1576.81	15	15	789.413	2	49.34	3704800	1	17949	Banda_7_824.raw	1	1	224	238			PEAKS DB
48	A0A1S2YNF8|A0A1S2YNF8_CICAR	K.VEDLSNEFATADAAR.K	Y	65.36	1607.74	15	26	804.881	2	44.48	1808800	1	15085	Banda_7_824.raw	1	1	25	39			PEAKS DB
48	A0A1S2YNF8|A0A1S2YNF8_CICAR	K.TYNTAADSVIDVK.S	Y	61.71	1395.69	13	33	698.854	2	42.76	1476900	1	14259	Banda_7_824.raw	1	1	434	446			PEAKS DB
48	A0A1S2YNF8|A0A1S2YNF8_CICAR	K.Q(-17.03)PGSTVQILGAEK.A	Y	47.95	1309.69	13	11	655.852	2	38.36	136100	1	12053	Banda_7_824.raw	1	1	309	321	Pyro-glu from Q	Q1:Pyro-glu from Q:1000.00	PEAKS DB
48	A0A1S2YNF8|A0A1S2YNF8_CICAR	K.FENTSEALEAATLLIDGK.A	Y	47.77	1920.97	18	11	961.492	2	56.69	725270	1	21746	Banda_7_824.raw	1	1	50	67			PEAKS DB
73	A0A1S2YY53|A0A1S2YY53_CICAR	K.AINPLELAMDAIK.E	Y	77.5	1397.76	13	4	699.887	2	58.24	701690	1	22501	Banda_7_824.raw	1	1	230	242			PEAKS DB
73	A0A1S2YY53|A0A1S2YY53_CICAR	K.LQEYVADINENIQK.L	Y	66.33	1675.84	14	22	838.93	2	43.82	1436600	1	14592	Banda_7_824.raw	1	1	309	322			PEAKS DB
55	A0A1S2XHQ9|A0A1S2XHQ9_CICAR	K.IGGIGTVPVGR.V	Y	66.31	1024.6	11	-4	513.308	2	45.88	8724400	1	15624	Banda_7_824.raw	1	1	244	254			PEAKS DB
55	A0A1S2XHQ9|A0A1S2XHQ9_CICAR	R.VETGVIKPGVIVTFGPTGLTTEVK.S	Y	58.19	2441.38	24	11	814.801	3	55.13	3967300	1	20973	Banda_7_824.raw	1	1	255	278			PEAKS DB
55	A0A1S2XHQ9|A0A1S2XHQ9_CICAR	R.Q(-17.03)TVAVGVIK.S	Y	44.79	896.533	9	3	897.541	1	36.69	845230	1	11193	Banda_7_824.raw	1	1	419	427	Pyro-glu from Q	Q1:Pyro-glu from Q:1000.00	PEAKS DB
93	A0A1S2YE72|A0A1S2YE72_CICAR	K.VTNSIALLDPLTLK.Y	Y	71.08	1496.88	14	4	749.448	2	56	721270	1	21523	Banda_7_824.raw	1	1	282	295			PEAKS DB
93	A0A1S2YE72|A0A1S2YE72_CICAR	R.VSDFGNNDTIFFVR.T	Y	64.38	1629.78	14	2	815.897	2	54.79	282140	1	20911	Banda_7_824.raw	1	1	355	368			PEAKS DB
93	A0A1S2YE72|A0A1S2YE72_CICAR	R.VQANPDQWVAAVQLR.Q	Y	44.18	1693.89	15	-19	847.951	2	52.18	0	1	19370	Banda_7_824.raw	0	0	151	165			PEAKS DB
41	A0A1S3E8Q6|A0A1S3E8Q6_CICAR	R.SVATPDAINK.Y	Y	62.65	1014.53	10	8	508.275	2	29.47	6095400	1	7939	Banda_7_824.raw	1	1	61	70			PEAKS DB
41	A0A1S3E8Q6|A0A1S3E8Q6_CICAR	K.IGDATALEVR.A	Y	53.49	1043.56	10	10	522.788	2	40.65	4540900	1	13810	Banda_7_824.raw	1	1	150	159			PEAKS DB
41	A0A1S3E8Q6|A0A1S3E8Q6_CICAR	K.YFIGSVLSGGGSVPAPK.A	Y	47.54	1634.87	17	-4	818.44	2	53.48	4136400	1	20428	Banda_7_824.raw	1	1	71	87			PEAKS DB
64	A0A1S2YYS3|A0A1S2YYS3_CICAR	R.LPGISETAAIFAGVDVTK.E	Y	69.61	1787.97	18	10	894.992	2	55.7	344050	1	21328	Banda_7_824.raw	1	1	358	375			PEAKS DB
64	A0A1S2YYS3|A0A1S2YYS3_CICAR	R.FQAASTILATGGYGR.A	Y	50.92	1511.77	15	2	756.894	2	49.76	2775200	1	17769	Banda_7_824.raw	1	1	225	239			PEAKS DB
64	A0A1S2YYS3|A0A1S2YYS3_CICAR	K.AVIELENYGLPFSR.T	Y	50.67	1606.84	14	-1	804.425	2	54.95	718350	1	20923	Banda_7_824.raw	1	1	126	139			PEAKS DB
69	A0A1S2YXU4|A0A1S2YXU4_CICAR	K.ALELDDEDISFLTNR.A	Y	66.83	1749.84	15	2	875.928	2	54.13	2420800	1	20411	Banda_7_824.raw	1	1	280	294			PEAKS DB
69	A0A1S2YXU4|A0A1S2YXU4_CICAR	K.IRSPGDEFDIPETNSPSSASSSER.K	Y	52.23	2564.16	24	-52	855.724	3	50.45	153320	1	18467	Banda_7_824.raw	1	1	196	219			PEAKS DB
69	A0A1S2YXU4|A0A1S2YXU4_CICAR	R.SPGDEFDIPETNSPSSASSSER.K	Y	50.02	2294.98	22	-6	1148.5	2	40.36	71370	1	13066	Banda_7_824.raw	2	2	198	219			PEAKS DB
59	A0A1S2XGX2|A0A1S2XGX2_CICAR	R.GDFQELDQIEAVKPFTK.F	Y	70.36	1963.99	17	18	655.671	3	54.46	209500	1	20619	Banda_7_824.raw	1	1	113	129			PEAKS DB
59	A0A1S2XGX2|A0A1S2XGX2_CICAR	K.GYLVGTPDELK.S	Y	45.72	1190.62	11	4	596.317	2	49.62	472400	1	17934	Banda_7_824.raw	1	1	526	536			PEAKS DB
49	A0A1S2YNS0|A0A1S2YNS0_CICAR	K.LAADTPLLTGQR.V	Y	52.25	1254.69	12	12	628.355	2	47.31	2258500	1	16578	Banda_7_824.raw	1	1	224	235			PEAKS DB
49	A0A1S2YNS0|A0A1S2YNS0_CICAR	R.LAEM(+15.99)PADSGYPAYLAAR.L	Y	51.01	1810.86	17	7	906.436	2	46.88	0	1	16255	Banda_7_824.raw	0	0	369	385	Oxidation (M)	M4:Oxidation (M):1000.00	PEAKS DB
49	A0A1S2YNS0|A0A1S2YNS0_CICAR	K.VTYVAPAGQYSLK.D	Y	44.59	1395.74	13	23	698.879	2	44.47	1454700	1	15093	Banda_7_824.raw	1	1	179	191			PEAKS DB
54	A0A1S2XVJ8|A0A1S2XVJ8_CICAR	R.NIENYGLAVLEVK.G	Y	70.58	1460.79	13	12	731.402	2	54.69	1269000	1	20800	Banda_7_824.raw	1	1	120	132			PEAKS DB
54	A0A1S2XVJ8|A0A1S2XVJ8_CICAR	K.AIIGLVMEDK.T	Y	45.33	1087.59	10	10	544.805	2	54.01	1434500	1	20582	Banda_7_824.raw	1	1	155	164			PEAKS DB
58	A0A1S2YPX2|A0A1S2YPX2_CICAR	K.DYAGDAAEK.T	Y	49.16	938.398	9	6	470.207	2	24.01	711510	1	5665	Banda_7_824.raw	1	1	234	242			PEAKS DB
58	A0A1S2YPX2|A0A1S2YPX2_CICAR	R.TGQYADDAAEDTR.D	Y	47.82	1411.59	13	8	706.8	2	27.6	83040	1	7280	Banda_7_824.raw	1	1	177	189			PEAKS DB
89	A0A3Q7XWI9|A0A3Q7XWI9_CICAR	R.AAVPSGASTGIYEALELR.D	Y	48.38	1803.94	18	57	902.981	2	53.75	1945700	1	20087	Banda_7_824.raw	1	1	35	52			PEAKS DB
89	A0A3Q7XWI9|A0A3Q7XWI9_CICAR	K.VNQIGSVTESIEAVR.M	Y	45.36	1600.84	15	-12	801.427	2	49.13	588940	1	17302	Banda_7_824.raw	1	1	353	367			PEAKS DB
115	A0A3Q7XVV9|A0A3Q7XVV9_CICAR	K.QSTSDNFVVSVPPTR.S	Y	59.77	1632.81	15	45	817.416	2	43.72	99608	1	14785	Banda_7_824.raw	1	1	341	355			PEAKS DB
115	A0A3Q7XVV9|A0A3Q7XVV9_CICAR	K.FVIEPVEVISSDGK.S	Y	43.89	1517.8	14	12	759.907	2	53.18	1441600	1	19719	Banda_7_824.raw	1	1	283	296			PEAKS DB
101	A0A1S2XZF3|A0A1S2XZF3_CICAR	R.FASAISDSGEITVEGR.V	Y	46.94	1637.79	16	21	819.904	2	45.55	323360	1	15593	Banda_7_824.raw	1	1	485	500			PEAKS DB
101	A0A1S2XZF3|A0A1S2XZF3_CICAR	R.LAVQLVAGGSGVK.T	Y	45.43	1197.71	13	18	599.862	2	47.73	0	1	16696	Banda_7_824.raw	0	0	391	403			PEAKS DB

## Sheet: 7
Protein ID	Protein Accession	Peptide	Unique	Score	Mass	Length	ppm	Colonna1	z	RT	Area Sample	Fraction	Scan	Source File	#Feature	#Feature Sample 1	Start	End	PTM	AScore	Found By
2	A0A1S2XSB9|A0A1S2XSB9_CICAR	R.LHQNIDSSSSPDIYIPQAGR.I	Y	107.18	2197.08	20	3	1099.55	2	49.13	75473000	1	16413	Banda_8_839.raw	3	3	344	363			PEAKS DB
2	A0A1S2XSB9|A0A1S2XSB9_CICAR	R.FYLAGNQEQEFLQYQQQEGR.K	Y	83.38	2475.15	20	5	1238.58	2	49.09	24159000	1	16344	Banda_8_839.raw	2	2	181	200			PEAKS DB
2	A0A1S2XSB9|A0A1S2XSB9_CICAR	R.IESEGGLIETWNPNNR.Q	Y	80.53	1827.88	16	21	914.947	2	48.38	36369000	1	16325	Banda_8_839.raw	1	1	45	60			PEAKS DB
2	A0A1S2XSB9|A0A1S2XSB9_CICAR	K.EEQENEGNNIFSGFR.R	Y	75.15	1768.77	15	14	885.391	2	48.76	5168300	1	16194	Banda_8_839.raw	1	1	202	216			PEAKS DB
2	A0A1S2XSB9|A0A1S2XSB9_CICAR	R.KEEQENEGNNIFSGFR.R	Y	74.17	1896.86	16	6	949.438	2	51.67	28858000	1	17764	Banda_8_839.raw	2	2	201	216			PEAKS DB
2	A0A1S2XSB9|A0A1S2XSB9_CICAR	K.SSNPFTFLVPPR.E	Y	71.52	1360.71	12	9	681.365	2	53.86	65076000	1	19300	Banda_8_839.raw	2	2	499	510			PEAKS DB
2	A0A1S2XSB9|A0A1S2XSB9_CICAR	R.DFLEDALNVNR.H	N	68.15	1304.64	11	8	653.326	2	51.98	65771000	1	18293	Banda_8_839.raw	2	2	218	228			PEAKS DB
2	A0A1S2XSB9|A0A1S2XSB9_CICAR	R.DNGFEETIC(+57.02)TAR.L	N	68.05	1411.6	12	4	706.809	2	39.63	0	1	11942	Banda_8_839.raw	0	0	332	343	Carbamidomethylation	C9:Carbamidomethylation:1000.00	PEAKS DB
2	A0A1S2XSB9|A0A1S2XSB9_CICAR	K.TVTSFDLPALR.W	N	63.4	1218.66	11	14	610.338	2	51.25	107190000	1	17956	Banda_8_839.raw	1	1	366	376			PEAKS DB
2	A0A1S2XSB9|A0A1S2XSB9_CICAR	K.LVGATSSLSSIPEDVIAATFNM(+15.99)ER.N	Y	58.94	2523.25	24	17	842.093	3	56.09	45552000	1	20024	Banda_8_839.raw	1	1	468	491	Oxidation (M)	M22:Oxidation (M):1000.00	PEAKS DB
2	A0A1S2XSB9|A0A1S2XSB9_CICAR	K.GGLSFISPSEK.Q	Y	57.82	1120.58	11	-2	561.295	2	47.62	71317000	1	15834	Banda_8_839.raw	2	2	251	261			PEAKS DB
2	A0A1S2XSB9|A0A1S2XSB9_CICAR	R.ALIVPQNFAVAAK.S	Y	55.35	1340.78	13	4	671.398	2	49.56	106030000	1	16907	Banda_8_839.raw	1	1	434	446			PEAKS DB
2	A0A1S2XSB9|A0A1S2XSB9_CICAR	K.VKGGLSFISPSEK.Q	Y	52.14	1347.74	13	13	674.878	2	51.12	5055600	1	17781	Banda_8_839.raw	1	1	249	261			PEAKS DB
2	A0A1S2XSB9|A0A1S2XSB9_CICAR	R.C(+57.02)AGVALSR.A	N	51.84	832.423	8	-3	417.218	2	32.06	9304800	1	8908	Banda_8_839.raw	1	1	64	71	Carbamidomethylation	C1:Carbamidomethylation:1000.00	PEAKS DB
2	A0A1S2XSB9|A0A1S2XSB9_CICAR	R.FSYVAFK.T	N	51	860.443	7	10	431.229	2	49.12	75993000	1	16624	Banda_8_839.raw	2	2	452	458			PEAKS DB
2	A0A1S2XSB9|A0A1S2XSB9_CICAR	R.Q(-17.03)EEDEDEDEDEKR.Q	Y	50.76	1647.6	13	16	824.81	2	17.78	1616100	1	2685	Banda_8_839.raw	2	2	271	283	Pyro-glu from Q	Q1:Pyro-glu from Q:1000.00	PEAKS DB
2	A0A1S2XSB9|A0A1S2XSB9_CICAR	R.Q(-17.03)DEDEDEEEKR.Q	Y	49.11	1403.53	11	26	702.775	2	20.27	3361300	1	3571	Banda_8_839.raw	2	2	307	317	Pyro-glu from Q	Q1:Pyro-glu from Q:1000.00	PEAKS DB
2	A0A1S2XSB9|A0A1S2XSB9_CICAR	R.Q(-17.03)DEDEDEKR.R	N	47.75	1145.45	9	7	573.731	2	20.27	7112300	1	3388	Banda_8_839.raw	2	2	291	299	Pyro-glu from Q	Q1:Pyro-glu from Q:1000.00	PEAKS DB
2	A0A1S2XSB9|A0A1S2XSB9_CICAR	R.DEDEEKGAIVK.V	Y	44.23	1231.59	11	-2	616.804	2	42.39	12258000	1	13253	Banda_8_839.raw	1	1	238	248			PEAKS DB
2	A0A1S2XSB9|A0A1S2XSB9_CICAR	R.LQVVNC(+57.02)NGNNVFDGELEAGR.A	Y	42.24	2204.03	20	-68	1103.01	2	46.37	0	1	15064	Banda_8_839.raw	0	0	414	433	Carbamidomethylation	C6:Carbamidomethylation:1000.00	PEAKS DB
2	A0A1S2XSB9|A0A1S2XSB9_CICAR	K.NAM(+15.99)FVPHYNLNANSILYALK.G	N	41.38	2308.17	20	20	770.398	3	54.15	2009300	1	19376	Banda_8_839.raw	1	1	390	409	Oxidation (M)	M3:Oxidation (M):1000.00	PEAKS DB
2	A0A1S2XSB9|A0A1S2XSB9_CICAR	K.LVGATSSLSSIPEDVIAATFNMER.N	Y	39.56	2507.26	24	14	836.761	3	58.47	5936600	1	21030	Banda_8_839.raw	1	1	468	491			PEAKS DB
2	A0A1S2XSB9|A0A1S2XSB9_CICAR	S.SNPFTFLVPPR.E	Y	36.33	1273.68	11	24	637.85	2	53.96	333330	1	19250	Banda_8_839.raw	1	1	500	510			PEAKS DB
2	A0A1S2XSB9|A0A1S2XSB9_CICAR	N.PFTFLVPPR.E	Y	36.24	1072.61	9	3	537.311	2	53.45	471850	1	18828	Banda_8_839.raw	1	1	502	510			PEAKS DB
2	A0A1S2XSB9|A0A1S2XSB9_CICAR	L.NALEPDNR.I	N	35.62	927.441	8	-6	464.728	2	27.74	1021600	1	6811	Banda_8_839.raw	1	1	37	44			PEAKS DB
2	A0A1S2XSB9|A0A1S2XSB9_CICAR	F.TFLVPPR.E	Y	34.71	828.486	7	-3	415.25	2	48.64	3447500	1	16426	Banda_8_839.raw	1	1	504	510			PEAKS DB
2	A0A1S2XSB9|A0A1S2XSB9_CICAR	R.EQPQQNEC(+57.02)QLEHLNALEPDNR.I	Y	34.07	2561.16	21	-12	854.725	3	48.11	7016300	1	16321	Banda_8_839.raw	1	1	24	44	Carbamidomethylation	C8:Carbamidomethylation:1000.00	PEAKS DB
6	A0A1S2YBR2|A0A1S2YBR2_CICAR	K.QLAPILDEVAVSYQSDADVVIAK.L	Y	92.92	2443.28	23	10	1222.65	2	54.58	14137000	1	19679	Banda_8_839.raw	3	3	444	466			PEAKS DB
6	A0A1S2YBR2|A0A1S2YBR2_CICAR	K.Q(-17.03)LAPILDEVAVSYQSDADVVIAK.L	Y	90.27	2426.26	23	19	809.761	3	60.49	10018000	1	22065	Banda_8_839.raw	2	2	444	466	Pyro-glu from Q	Q1:Pyro-glu from Q:1000.00	PEAKS DB
6	A0A1S2YBR2|A0A1S2YBR2_CICAR	K.SEPIPETNNEPVK.V	Y	73.87	1452.71	13	15	727.363	2	30.09	103450000	1	7863	Banda_8_839.raw	1	1	400	412			PEAKS DB
6	A0A1S2YBR2|A0A1S2YBR2_CICAR	K.TLEDIVFNSGK.N	Y	72.23	1221.62	11	12	611.82	2	49.65	79323000	1	16552	Banda_8_839.raw	2	2	418	428			PEAKS DB
6	A0A1S2YBR2|A0A1S2YBR2_CICAR	K.EYVLTLDNSNFHDTVSK.H	Y	71.87	1980.94	17	12	661.322	3	50.97	54097000	1	17583	Banda_8_839.raw	2	2	65	81			PEAKS DB
6	A0A1S2YBR2|A0A1S2YBR2_CICAR	R.EADGIVEYVK.K	Y	71.74	1121.56	10	4	561.788	2	44.13	79845000	1	13959	Banda_8_839.raw	2	2	163	172			PEAKS DB
6	A0A1S2YBR2|A0A1S2YBR2_CICAR	K.EGTLAPFVK.S	Y	71.31	960.528	9	0	481.271	2	47.79	744000	1	15892	Banda_8_839.raw	2	2	391	399			PEAKS DB
6	A0A1S2YBR2|A0A1S2YBR2_CICAR	K.SADDASAFIGEK.S	Y	71.07	1209.55	12	9	605.783	2	38.23	102440000	1	11270	Banda_8_839.raw	1	1	184	195			PEAKS DB
6	A0A1S2YBR2|A0A1S2YBR2_CICAR	K.AASILSSHNPPIFLAK.V	Y	71.02	1664.92	16	13	833.471	2	52.76	54884000	1	18793	Banda_8_839.raw	2	2	107	122			PEAKS DB
6	A0A1S2YBR2|A0A1S2YBR2_CICAR	K.QQGVSFLVGDVEASQGAFQYFGLK.E	Y	70.17	2574.28	24	11	859.1	3	60.17	5247600	1	21890	Banda_8_839.raw	2	2	332	355			PEAKS DB
6	A0A1S2YBR2|A0A1S2YBR2_CICAR	R.GDSSVSGPVVR.L	Y	69.09	1058.54	11	3	530.275	2	29.05	138540000	1	7384	Banda_8_839.raw	3	3	239	249			PEAKS DB
6	A0A1S2YBR2|A0A1S2YBR2_CICAR	K.YSEVAEQYK.Q	Y	69.05	1115.51	9	2	558.764	2	30.79	89748000	1	7878	Banda_8_839.raw	2	2	323	331			PEAKS DB
6	A0A1S2YBR2|A0A1S2YBR2_CICAR	K.LDATANDVPSETFVVQGYPTLYFR.S	Y	67.79	2702.32	24	20	901.783	3	53.59	28839000	1	18700	Banda_8_839.raw	2	2	467	490			PEAKS DB
6	A0A1S2YBR2|A0A1S2YBR2_CICAR	K.EDQVPLIIVQNTDGK.K	Y	65.71	1667.87	15	20	834.945	2	47.32	50933000	1	15453	Banda_8_839.raw	1	1	356	370			PEAKS DB
6	A0A1S2YBR2|A0A1S2YBR2_CICAR	K.QSGPASTEIK.S	Y	65.61	1016.51	10	2	509.264	2	26.7	32251000	1	6085	Banda_8_839.raw	2	2	174	183			PEAKS DB
6	A0A1S2YBR2|A0A1S2YBR2_CICAR	K.EDQVPLIIVQNTDGKK.F	Y	64.33	1795.97	16	11	599.664	3	50.18	29782000	1	17289	Banda_8_839.raw	2	2	356	371			PEAKS DB
6	A0A1S2YBR2|A0A1S2YBR2_CICAR	K.SVVIVGVFPK.F	Y	60.84	1043.64	10	3	522.826	2	51.49	49431000	1	17969	Banda_8_839.raw	2	2	196	205			PEAKS DB
6	A0A1S2YBR2|A0A1S2YBR2_CICAR	K.EIATQYEVK.G	Y	60	1079.55	9	5	540.783	2	34.97	71125000	1	10005	Banda_8_839.raw	1	1	132	140			PEAKS DB
6	A0A1S2YBR2|A0A1S2YBR2_CICAR	K.Q(-17.03)SGPASTEIK.S	Y	59.83	999.487	10	12	500.752	2	24.36	28395000	1	5024	Banda_8_839.raw	2	2	174	183	Pyro-glu from Q	Q1:Pyro-glu from Q:1000.00	PEAKS DB
6	A0A1S2YBR2|A0A1S2YBR2_CICAR	K.EAIIEFIEK.S	Y	58.51	1090.59	9	2	546.303	2	51.8	62231000	1	18164	Banda_8_839.raw	2	2	506	514			PEAKS DB
6	A0A1S2YBR2|A0A1S2YBR2_CICAR	K.FFKPNLEADDVPTWLK.A	Y	56.89	1918.98	16	14	640.669	3	54.17	3186600	1	19085	Banda_8_839.raw	2	2	372	387			PEAKS DB
6	A0A1S2YBR2|A0A1S2YBR2_CICAR	K.DFNVEALEK.F	Y	56.08	1063.52	9	3	532.767	2	46.31	84086000	1	15279	Banda_8_839.raw	2	2	263	271			PEAKS DB
6	A0A1S2YBR2|A0A1S2YBR2_CICAR	K.FIEESSIPVVTVFNNDPSNHPYVSK.F	Y	53.82	2818.38	25	19	940.47	3	52.74	58777000	1	18674	Banda_8_839.raw	2	2	272	296			PEAKS DB
6	A0A1S2YBR2|A0A1S2YBR2_CICAR	K.E(-18.01)IATQYEVK.G	Y	53.37	1061.54	9	2	531.777	2	33.46	1442100	1	9084	Banda_8_839.raw	1	1	132	140	Pyro-glu from E	E1:Pyro-glu from E:1000.00	PEAKS DB
6	A0A1S2YBR2|A0A1S2YBR2_CICAR	K.LSQYDGDR.T	Y	52.98	952.425	8	4	477.22	2	17.85	58542000	1	2714	Banda_8_839.raw	2	2	496	503			PEAKS DB
6	A0A1S2YBR2|A0A1S2YBR2_CICAR	R.DKPAAAAAAAAAQQEVEQPKDEL	Y	52.77	2321.15	23	-2	774.724	3	47.87	68201000	1	15919	Banda_8_839.raw	2	2	517	539			PEAKS DB
6	A0A1S2YBR2|A0A1S2YBR2_CICAR	K.Q(-17.03)QGVSFLVGDVEASQGAFQYFGLK.E	Y	51.49	2557.25	24	15	853.425	3	60.15	5748900	1	21848	Banda_8_839.raw	1	1	332	355	Pyro-glu from Q	Q1:Pyro-glu from Q:1000.00	PEAKS DB
6	A0A1S2YBR2|A0A1S2YBR2_CICAR	K.FFNSPNAK.A	Y	51.1	923.45	8	5	462.733	2	40.35	63933000	1	12156	Banda_8_839.raw	2	2	297	304			PEAKS DB
6	A0A1S2YBR2|A0A1S2YBR2_CICAR	K.FSGEEFDK.F	Y	49.24	957.408	8	-6	479.711	2	37.32	30509000	1	10840	Banda_8_839.raw	1	1	206	213			PEAKS DB
6	A0A1S2YBR2|A0A1S2YBR2_CICAR	R.SDYDFGHTLDAK.H	Y	48.81	1367.6	12	12	684.808	2	49.13	11392000	1	16268	Banda_8_839.raw	1	1	223	234			PEAKS DB
6	A0A1S2YBR2|A0A1S2YBR2_CICAR	K.E(-18.01)DQVPLIIVQNTDGK.K	Y	48.61	1649.86	15	11	825.939	2	46.09	903210	1	14790	Banda_8_839.raw	1	1	356	370	Pyro-glu from E	E1:Pyro-glu from E:1000.00	PEAKS DB
6	A0A1S2YBR2|A0A1S2YBR2_CICAR	K.NKEIATQYEVK.G	Y	47.15	1321.69	11	17	661.852	2	47.16	7691700	1	15218	Banda_8_839.raw	1	1	130	140			PEAKS DB
6	A0A1S2YBR2|A0A1S2YBR2_CICAR	R.EADGIVEYVKK.Q	Y	42.24	1249.66	11	2	417.559	3	48.55	9657600	1	16492	Banda_8_839.raw	1	1	163	173			PEAKS DB
6	A0A1S2YBR2|A0A1S2YBR2_CICAR	K.NLAPEYEK.A	Y	42.15	962.471	8	9	482.243	2	32.87	59534000	1	9045	Banda_8_839.raw	2	2	99	106			PEAKS DB
6	A0A1S2YBR2|A0A1S2YBR2_CICAR	K.KQSGPASTEIK.S	Y	39.06	1144.61	11	-2	573.312	2	46.03	11972000	1	14247	Banda_8_839.raw	1	1	173	183			PEAKS DB
6	A0A1S2YBR2|A0A1S2YBR2_CICAR	R.E(-18.01)ADGIVEYVK.K	Y	37.81	1103.55	10	9	1104.56	1	39.57	402670	1	12050	Banda_8_839.raw	1	1	163	172	Pyro-glu from E	E1:Pyro-glu from E:1000.00	PEAKS DB
6	A0A1S2YBR2|A0A1S2YBR2_CICAR	R.DKPAAAAAAAAAQQEVEQPK.D	Y	37.38	1964	20	4	655.673	3	45.78	1966800	1	14902	Banda_8_839.raw	1	1	517	536			PEAKS DB
6	A0A1S2YBR2|A0A1S2YBR2_CICAR	K.E(-18.01)AIIEFIEK.S	Y	34.63	1072.58	9	-3	1073.59	1	54.15	185460	1	19149	Banda_8_839.raw	1	1	506	514	Pyro-glu from E	E1:Pyro-glu from E:1000.00	PEAKS DB
4	A0A1S2Y087|A0A1S2Y087_CICAR	R.NFLAGEDDNVISQIQNPVK.E	Y	93.16	2100.05	19	9	1051.03	2	50.16	46008000	1	17257	Banda_8_839.raw	2	2	525	543			PEAKS DB
4	A0A1S2Y087|A0A1S2Y087_CICAR	R.QSYFANAQPQQR.E	Y	83.72	1436.68	12	20	719.349	2	35.76	10852000	1	10056	Banda_8_839.raw	1	1	563	574			PEAKS DB
4	A0A1S2Y087|A0A1S2Y087_CICAR	R.GSEESEEGDAIVK.V	Y	77.44	1348.6	13	6	675.307	2	28.48	48641000	1	7090	Banda_8_839.raw	1	1	346	358			PEAKS DB
4	A0A1S2Y087|A0A1S2Y087_CICAR	R.VLLEEQEPEQSR.G	Y	75.39	1455.72	12	17	728.869	2	37.55	115850000	1	11025	Banda_8_839.raw	1	1	331	342			PEAKS DB
4	A0A1S2Y087|A0A1S2Y087_CICAR	R.Q(-17.03)SYFANAQPQQR.E	Y	71.64	1419.65	12	13	710.835	2	32.61	21503000	1	8605	Banda_8_839.raw	1	1	563	574	Pyro-glu from Q	Q1:Pyro-glu from Q:1000.00	PEAKS DB
4	A0A1S2Y087|A0A1S2Y087_CICAR	K.ELTFPGSAQEVNR.L	Y	71.12	1446.71	13	17	724.364	2	45.18	60267000	1	14465	Banda_8_839.raw	1	1	544	556			PEAKS DB
4	A0A1S2Y087|A0A1S2Y087_CICAR	K.LPAGTTAYLANHDDEEDLR.V	Y	68.71	2099.98	19	6	701	3	49.42	32896000	1	16908	Banda_8_839.raw	3	3	262	280			PEAKS DB
4	A0A1S2Y087|A0A1S2Y087_CICAR	K.SESKEDEEESSSESQGR.R	Y	62.54	1898.76	17	1	633.928	3	27.71	10063000	1	6607	Banda_8_839.raw	1	1	151	167			PEAKS DB
4	A0A1S2Y087|A0A1S2Y087_CICAR	K.SILEASFNTK.Y	Y	60.06	1108.58	10	-15	555.295	2	48.34	68953000	1	16240	Banda_8_839.raw	2	2	315	324			PEAKS DB
4	A0A1S2Y087|A0A1S2Y087_CICAR	K.FFEITPEK.S	N	59.79	1009.51	8	5	1010.52	1	48.76	63044000	1	16385	Banda_8_839.raw	2	2	402	409			PEAKS DB
4	A0A1S2Y087|A0A1S2Y087_CICAR	K.AILTVLNPNDR.N	N	58.95	1224.68	11	-6	613.348	2	49.89	81444000	1	17114	Banda_8_839.raw	1	1	239	249			PEAKS DB
4	A0A1S2Y087|A0A1S2Y087_CICAR	R.NEQQEQQQEEDEEQEEEER.N	Y	58.93	2461.96	19	16	821.662	3	24.48	9076900	1	5392	Banda_8_839.raw	2	2	459	477			PEAKS DB
4	A0A1S2Y087|A0A1S2Y087_CICAR	R.SNLFQNLQNYR.F	Y	58.12	1395.69	11	-1	698.852	2	50.6	25952000	1	17167	Banda_8_839.raw	1	1	199	209			PEAKS DB
4	A0A1S2Y087|A0A1S2Y087_CICAR	K.E(-18.01)LTFPGSAQEVNR.L	Y	56.31	1428.7	13	8	715.358	2	40.93	1272200	1	12467	Banda_8_839.raw	1	1	544	556	Pyro-glu from E	E1:Pyro-glu from E:1000.00	PEAKS DB
4	A0A1S2Y087|A0A1S2Y087_CICAR	R.VVELAIPVNRPGK.F	Y	53.3	1390.83	13	-4	464.617	3	51.01	4963000	1	17768	Banda_8_839.raw	2	2	281	293			PEAKS DB
4	A0A1S2Y087|A0A1S2Y087_CICAR	K.SISSESEPFNLR.S	Y	52.91	1364.66	12	4	683.336	2	47.05	43801000	1	15622	Banda_8_839.raw	1	1	378	389			PEAKS DB
4	A0A1S2Y087|A0A1S2Y087_CICAR	R.EQIEELSK.H	N	52.68	974.492	8	-6	975.499	1	31.11	118670000	1	8091	Banda_8_839.raw	2	2	362	369			PEAKS DB
4	A0A1S2Y087|A0A1S2Y087_CICAR	R.RGSEESEEGDAIVK.V	Y	49.76	1504.7	14	-3	502.574	3	46.68	39086000	1	15161	Banda_8_839.raw	2	2	345	358			PEAKS DB
4	A0A1S2Y087|A0A1S2Y087_CICAR	R.AIVVLFINEGK.G	Y	49.31	1201.71	11	7	601.861	2	53.38	475440	1	18770	Banda_8_839.raw	1	1	439	449			PEAKS DB
4	A0A1S2Y087|A0A1S2Y087_CICAR	K.KSESKEDEEESSSESQGR.R	Y	48.91	2026.86	18	7	1014.44	2	47.62	6874800	1	15616	Banda_8_839.raw	2	2	150	167			PEAKS DB
4	A0A1S2Y087|A0A1S2Y087_CICAR	R.SRNPIYSNK.F	N	45.52	1077.56	9	4	539.786	2	47.36	14416000	1	15592	Banda_8_839.raw	1	1	390	398			PEAKS DB
4	A0A1S2Y087|A0A1S2Y087_CICAR	R.NSFNLER.G	Y	43.21	878.425	7	-4	440.219	2	41.48	60483000	1	12648	Banda_8_839.raw	1	1	250	256			PEAKS DB
4	A0A1S2Y087|A0A1S2Y087_CICAR	K.GHLELVGLR.N	Y	42.38	992.577	9	11	497.296	2	52.51	142600	1	18280	Banda_8_839.raw	1	1	450	458			PEAKS DB
4	A0A1S2Y087|A0A1S2Y087_CICAR	Y.LANHDDEEDLR.V	Y	41.91	1325.58	11	-1	663.8	2	46.59	1005900	1	15181	Banda_8_839.raw	1	1	270	280			PEAKS DB
4	A0A1S2Y087|A0A1S2Y087_CICAR	R.E(-18.01)QIEELSK.H	N	39.14	956.481	8	2	479.248	2	31.46	2365800	1	8339	Banda_8_839.raw	1	1	362	369	Pyro-glu from E	E1:Pyro-glu from E:1000.00	PEAKS DB
4	A0A1S2Y087|A0A1S2Y087_CICAR	R.EEEEDEEFR.E	Y	38.29	1210.46	9	13	606.239	2	21.6	3756.1	1	4052	Banda_8_839.raw	1	1	115	123			PEAKS DB
4	A0A1S2Y087|A0A1S2Y087_CICAR	R.LLQNFDK.R	Y	37.14	876.471	7	2	439.243	2	45.37	1465000	1	14907	Banda_8_839.raw	1	1	191	197			PEAKS DB
4	A0A1S2Y087|A0A1S2Y087_CICAR	R.KSISSESEPFNLR.S	Y	36.96	1492.75	13	7	498.592	3	50.47	24119000	1	16944	Banda_8_839.raw	1	1	377	389			PEAKS DB
4	A0A1S2Y087|A0A1S2Y087_CICAR	F.GINAENNQR.N	Y	33.6	1014.48	9	0	508.249	2	24.76	28830	1	5110	Banda_8_839.raw	1	1	516	524			PEAKS DB
8	A0A1S2YZ56|A0A1S2YZ56_CICAR	R.RTEEAESEEEAAR.R	Y	79.78	1505.66	13	6	753.837	2	42.41	245080000	1	13362	Banda_8_839.raw	4	4	587	599			PEAKS DB
8	A0A1S2YZ56|A0A1S2YZ56_CICAR	R.VVC(+57.02)GSNNVDEC(+57.02)QNK.R	Y	77.08	1621.68	14	10	811.849	2	17.78	21395000	1	2675	Banda_8_839.raw	2	2	361	374	Carbamidomethylation	C3:Carbamidomethylation:1000.00;C11:Carbamidomethylation:1000.00	PEAKS DB
8	A0A1S2YZ56|A0A1S2YZ56_CICAR	K.TEEEEEETESEGGR.R	Y	75.98	1609.62	14	13	805.82	2	22.72	7453300	1	4520	Banda_8_839.raw	2	2	626	639			PEAKS DB
8	A0A1S2YZ56|A0A1S2YZ56_CICAR	K.QGDVFLVPR.F	Y	70.55	1029.56	9	16	515.788	2	49.12	194780000	1	16689	Banda_8_839.raw	2	2	380	388			PEAKS DB
8	A0A1S2YZ56|A0A1S2YZ56_CICAR	R.EEETTEWEEEVAK.R	Y	70.09	1607.68	13	17	804.851	2	41	17812000	1	12480	Banda_8_839.raw	1	1	647	659			PEAKS DB
8	A0A1S2YZ56|A0A1S2YZ56_CICAR	K.Q(-17.03)IVATSLC(+57.02)VSK.R	Y	69.72	1187.62	11	16	594.819	2	39.49	50286000	1	11755	Banda_8_839.raw	2	2	432	442	Pyro-glu from Q; Carbamidomethylation	Q1:Pyro-glu from Q:1000.00;C8:Carbamidomethylation:1000.00	PEAKS DB
8	A0A1S2YZ56|A0A1S2YZ56_CICAR	K.NHPQFLAGK.G	Y	66.84	1010.53	9	-35	506.27	2	49.38	60474000	1	17086	Banda_8_839.raw	1	1	414	422			PEAKS DB
8	A0A1S2YZ56|A0A1S2YZ56_CICAR	R.EQEEESEGEGEAKTEEEEEETESEGGR.R	Y	66.56	3041.19	27	20	1014.74	3	35.86	86524000	1	9980	Banda_8_839.raw	1	1	613	639			PEAKS DB
8	A0A1S2YZ56|A0A1S2YZ56_CICAR	K.EPLVFMGFSTAAK.K	Y	65.48	1396.71	13	6	699.361	2	53.43	215900	1	18782	Banda_8_839.raw	1	1	400	412			PEAKS DB
8	A0A1S2YZ56|A0A1S2YZ56_CICAR	K.NSHGWTLTVTK.K	Y	65.08	1242.64	11	1	622.325	2	50.89	108860000	1	17274	Banda_8_839.raw	2	2	304	314			PEAKS DB
8	A0A1S2YZ56|A0A1S2YZ56_CICAR	R.SREEETTEWEEEVAK.R	Y	64.19	1850.82	15	9	926.417	2	48.94	11120000	1	16568	Banda_8_839.raw	2	2	645	659			PEAKS DB
8	A0A1S2YZ56|A0A1S2YZ56_CICAR	R.TEEAESEEEAAR.R	Y	63.5	1349.56	12	8	675.787	2	21.81	40061000	1	4126	Banda_8_839.raw	2	2	588	599			PEAKS DB
8	A0A1S2YZ56|A0A1S2YZ56_CICAR	R.EQEEESEGEGEAK.T	Y	63.42	1449.57	13	19	725.796	2	17.77	751100	1	2665	Banda_8_839.raw	1	1	613	625			PEAKS DB
8	A0A1S2YZ56|A0A1S2YZ56_CICAR	K.Q(-17.03)GDVFLVPR.F	Y	62.29	1012.53	9	16	1013.54	1	46	176480000	1	14898	Banda_8_839.raw	2	2	380	388	Pyro-glu from Q	Q1:Pyro-glu from Q:1000.00	PEAKS DB
8	A0A1S2YZ56|A0A1S2YZ56_CICAR	K.QIVATSLC(+57.02)VSK.R	Y	61.73	1204.65	11	9	603.332	2	42.03	61719000	1	13210	Banda_8_839.raw	1	1	432	442	Carbamidomethylation	C8:Carbamidomethylation:1000.00	PEAKS DB
8	A0A1S2YZ56|A0A1S2YZ56_CICAR	R.VVC(+57.02)GSNNVDEC(+57.02)QNKR.F	Y	56.32	1777.78	15	-6	593.601	3	32.67	20459000	1	10198	Banda_8_839.raw	3	3	361	375	Carbamidomethylation	C3:Carbamidomethylation:1000.00;C11:Carbamidomethylation:1000.00	PEAKS DB
8	A0A1S2YZ56|A0A1S2YZ56_CICAR	K.LQTYNIFDNDPDFK.N	Y	55.57	1728.8	14	27	865.409	2	51.2	210790000	1	17434	Banda_8_839.raw	1	1	290	303			PEAKS DB
8	A0A1S2YZ56|A0A1S2YZ56_CICAR	R.SREEETTEWEEEVAKR.Q	Y	53.46	2006.92	16	-9	669.979	3	51.41	8102400	1	17957	Banda_8_839.raw	2	2	645	660			PEAKS DB
8	A0A1S2YZ56|A0A1S2YZ56_CICAR	K.EEEEEEVR.R	Y	53.2	1047.44	8	6	524.725	2	24.81	11036000	1	5513	Banda_8_839.raw	2	2	518	525			PEAKS DB
8	A0A1S2YZ56|A0A1S2YZ56_CICAR	K.KNHPQFLAGK.G	Y	51.57	1138.62	10	-13	570.319	2	51.92	37190	1	18133	Banda_8_839.raw	1	1	413	422			PEAKS DB
8	A0A1S2YZ56|A0A1S2YZ56_CICAR	K.GSVLQILDK.Q	Y	50.16	971.565	9	0	486.79	2	53.86	316250000	1	19062	Banda_8_839.raw	2	2	423	431			PEAKS DB
8	A0A1S2YZ56|A0A1S2YZ56_CICAR	R.E(-18.01)EEEEEEKGR.E	Y	49.96	1244.52	10	-7	623.265	2	17.89	2182700	1	2694	Banda_8_839.raw	3	3	488	497	Pyro-glu from E	E1:Pyro-glu from E:1000.00	PEAKS DB
8	A0A1S2YZ56|A0A1S2YZ56_CICAR	K.KLQTYNIFDNDPDFK.N	Y	49.76	1856.89	15	4	619.972	3	52.64	9798600	1	18536	Banda_8_839.raw	2	2	289	303			PEAKS DB
8	A0A1S2YZ56|A0A1S2YZ56_CICAR	R.EEETTEWEEEVAKR.Q	Y	49.43	1763.78	14	4	588.936	3	48.71	18717000	1	16577	Banda_8_839.raw	1	1	647	660			PEAKS DB
8	A0A1S2YZ56|A0A1S2YZ56_CICAR	R.E(-18.01)EETTEWEEEVAKR.Q	Y	48.08	1745.77	14	15	873.896	2	44.68	1861700	1	14174	Banda_8_839.raw	1	1	647	660	Pyro-glu from E	E1:Pyro-glu from E:1000.00	PEAKS DB
8	A0A1S2YZ56|A0A1S2YZ56_CICAR	R.VKQGDVFLVPR.F	Y	46.13	1256.72	11	-2	419.915	3	51.92	19458000	1	18340	Banda_8_839.raw	2	2	378	388			PEAKS DB
8	A0A1S2YZ56|A0A1S2YZ56_CICAR	N.IFDNDPDFK.N	Y	43.66	1109.5	9	14	555.76	2	45.92	738200	1	14798	Banda_8_839.raw	1	1	295	303			PEAKS DB
8	A0A1S2YZ56|A0A1S2YZ56_CICAR	R.EEEEEEEKGR.E	Y	41.53	1262.53	10	7	421.85	3	31.01	14751000	1	8030	Banda_8_839.raw	1	1	488	497			PEAKS DB
8	A0A1S2YZ56|A0A1S2YZ56_CICAR	K.EPLVFM(+15.99)GFSTAAK.K	Y	39.92	1412.7	13	3	707.358	2	50.54	6984100	1	17214	Banda_8_839.raw	1	1	400	412	Oxidation (M)	M6:Oxidation (M):1000.00	PEAKS DB
8	A0A1S2YZ56|A0A1S2YZ56_CICAR	K.E(-18.01)EEEEEVR.R	Y	39.75	1029.42	8	7	515.72	2	22.02	600320	1	4134	Banda_8_839.raw	2	2	518	525	Pyro-glu from E	E1:Pyro-glu from E:1000.00	PEAKS DB
8	A0A1S2YZ56|A0A1S2YZ56_CICAR	R.EEREQEEESEGEGEAKTEEEEEETESEGGR.R	Y	38.52	3455.37	30	22	1152.8	3	47.25	14282	1	15544	Banda_8_839.raw	1	1	610	639			PEAKS DB
8	A0A1S2YZ56|A0A1S2YZ56_CICAR	R.RTEEAESEEEAARR.Q	Y	38.15	1661.76	14	-8	554.927	3	49.36	23357000	1	16510	Banda_8_839.raw	1	1	587	600			PEAKS DB
8	A0A1S2YZ56|A0A1S2YZ56_CICAR	K.TEEEEEETESEGGRR.Q	Y	37.08	1765.72	15	12	589.583	3	36.38	39417000	1	10241	Banda_8_839.raw	2	2	626	640			PEAKS DB
8	A0A1S2YZ56|A0A1S2YZ56_CICAR	H.MSFDKEPLVFM(+15.99)GFSTAAK.K	Y	35.78	2020.96	18	4	674.662	3	53.24	3041900	1	18572	Banda_8_839.raw	1	1	395	412	Oxidation (M)	M11:Oxidation (M):29.98	PEAKS DB
9	A0A1S2YKM3|A0A1S2YKM3_CICAR	K.TNDSAGDGTTTASILAR.E	Y	87.89	1649.79	17	17	825.902	2	38.75	5091500	1	11544	Banda_8_839.raw	1	1	127	143			PEAKS DB
9	A0A1S2YKM3|A0A1S2YKM3_CICAR	R.GYISPQFVTNPEK.S	Y	78.09	1478.74	13	9	740.378	2	46.32	7232100	1	14993	Banda_8_839.raw	1	1	244	256			PEAKS DB
9	A0A1S2YKM3|A0A1S2YKM3_CICAR	K.DSTTIIADAASKDELQSR.V	Y	73.84	1919.94	18	-2	640.988	3	47.69	6507300	1	15984	Banda_8_839.raw	1	1	374	391			PEAKS DB
9	A0A1S2YKM3|A0A1S2YKM3_CICAR	K.VGAATETELEDR.K	Y	73.25	1289.61	12	15	645.813	2	32.79	11331000	1	8631	Banda_8_839.raw	1	1	427	438			PEAKS DB
9	A0A1S2YKM3|A0A1S2YKM3_CICAR	K.ELSETDSVYDSEK.L	Y	69.54	1500.65	13	5	751.331	2	32.15	7000900	1	8419	Banda_8_839.raw	1	1	398	410			PEAKS DB
9	A0A1S2YKM3|A0A1S2YKM3_CICAR	K.ALVAPASLIAQNAGIEGEVVVEK.I	Y	67.72	2277.26	23	7	760.094	3	51.92	5817800	1	18294	Banda_8_839.raw	1	1	494	516			PEAKS DB
9	A0A1S2YKM3|A0A1S2YKM3_CICAR	K.AVATISAGNDELIGK.M	Y	60.27	1457.77	15	15	729.895	2	42.52	7359900	1	13037	Banda_8_839.raw	1	1	192	206			PEAKS DB
9	A0A1S2YKM3|A0A1S2YKM3_CICAR	K.LGLLSVTSGANPVSIK.K	Y	58.1	1554.9	16	23	778.458	2	52	5552900	1	18354	Banda_8_839.raw	1	1	148	163			PEAKS DB
9	A0A1S2YKM3|A0A1S2YKM3_CICAR	K.ETLEDADER.L	Y	55.63	1076.46	9	1	539.238	2	27.35	6153700	1	6397	Banda_8_839.raw	2	2	477	485			PEAKS DB
9	A0A1S2YKM3|A0A1S2YKM3_CICAR	K.LGLLSVTSGANPVSIKK.G	Y	49.84	1682.99	17	1	562.005	3	52.51	1036500	1	18642	Banda_8_839.raw	1	1	148	164			PEAKS DB
9	A0A1S2YKM3|A0A1S2YKM3_CICAR	R.AIELPDAMENAGAALIR.E	Y	48.9	1753.9	17	1	877.959	2	52.7	207430	1	18478	Banda_8_839.raw	1	1	105	121			PEAKS DB
9	A0A1S2YKM3|A0A1S2YKM3_CICAR	K.LADAVGLTLGPR.G	Y	47.81	1181.68	12	-2	591.846	2	48.92	5355700	1	16134	Banda_8_839.raw	1	1	70	81			PEAKS DB
9	A0A1S2YKM3|A0A1S2YKM3_CICAR	K.VVNDGVTIAR.A	Y	46.77	1042.58	10	6	522.296	2	32.26	5605800	1	10372	Banda_8_839.raw	1	1	95	104			PEAKS DB
9	A0A1S2YKM3|A0A1S2YKM3_CICAR	K.DIIPLLEK.T	Y	33.58	939.564	8	9	470.79	2	51.74	3708800	1	17796	Banda_8_839.raw	1	1	278	285			PEAKS DB
10	A0A3Q7XNW1|A0A3Q7XNW1_CICAR	R.LHQNIGSSSSPDIYNPQAGR.I	N	86.56	2140.03	20	4	714.351	3	47.47	19807000	1	15920	Banda_8_839.raw	2	2	325	344			PEAKS DB
10	A0A3Q7XNW1|A0A3Q7XNW1_CICAR	R.DFLEDALNVNR.R	N	68.15	1304.64	11	8	653.326	2	51.98	65771000	1	18293	Banda_8_839.raw	2	2	219	229			PEAKS DB
10	A0A3Q7XNW1|A0A3Q7XNW1_CICAR	R.DNGFEETIC(+57.02)TAR.L	N	68.05	1411.6	12	4	706.809	2	39.63	0	1	11942	Banda_8_839.raw	0	0	313	324	Carbamidomethylation	C9:Carbamidomethylation:1000.00	PEAKS DB
10	A0A3Q7XNW1|A0A3Q7XNW1_CICAR	K.FNSPFSFLVPPR.S	Y	66.51	1406.73	12	13	704.375	2	55.63	5258500	1	19710	Banda_8_839.raw	1	1	480	491			PEAKS DB
10	A0A3Q7XNW1|A0A3Q7XNW1_CICAR	K.GNSVFDGELEAGR.A	N	65.42	1349.62	13	10	675.818	2	45.5	8826200	1	14699	Banda_8_839.raw	1	1	402	414			PEAKS DB
10	A0A3Q7XNW1|A0A3Q7XNW1_CICAR	K.TVTSFDLPALR.F	N	63.4	1218.66	11	14	610.338	2	51.25	107190000	1	17956	Banda_8_839.raw	1	1	347	357			PEAKS DB
10	A0A3Q7XNW1|A0A3Q7XNW1_CICAR	K.SEGGLIETWNPSNK.Q	N	61.46	1530.73	14	15	766.374	2	47.45	26548000	1	15737	Banda_8_839.raw	1	1	47	60			PEAKS DB
10	A0A3Q7XNW1|A0A3Q7XNW1_CICAR	R.ATLQPNSLR.R	Y	58.03	998.551	9	-1	500.283	2	36.32	35633000	1	10311	Banda_8_839.raw	1	1	72	80			PEAKS DB
10	A0A3Q7XNW1|A0A3Q7XNW1_CICAR	R.LLGASSLINGM(+15.99)PEEVVAAAFNM(+15.99)ER.N	Y	55.66	2550.25	24	13	851.09	3	54.22	5308400	1	19318	Banda_8_839.raw	1	1	449	472	Oxidation (M)	M11:Oxidation (M):1000.00;M22:Oxidation (M):1000.00	PEAKS DB
10	A0A3Q7XNW1|A0A3Q7XNW1_CICAR	R.C(+57.02)AGVALSR.A	N	51.84	832.423	8	-3	417.218	2	32.06	9304800	1	8908	Banda_8_839.raw	1	1	64	71	Carbamidomethylation	C1:Carbamidomethylation:1000.00	PEAKS DB
10	A0A3Q7XNW1|A0A3Q7XNW1_CICAR	R.FSYVAFK.T	N	51	860.443	7	10	431.229	2	49.12	75993000	1	16624	Banda_8_839.raw	2	2	433	439			PEAKS DB
10	A0A3Q7XNW1|A0A3Q7XNW1_CICAR	K.GGLSIITPPEKEPR.Q	Y	48.83	1492.82	14	10	747.42	2	50.79	8283300	1	17290	Banda_8_839.raw	1	1	252	265			PEAKS DB
10	A0A3Q7XNW1|A0A3Q7XNW1_CICAR	R.Q(-17.03)DEDEDEKR.Q	N	47.75	1145.45	9	7	573.731	2	20.27	7112300	1	3388	Banda_8_839.raw	2	2	290	298	Pyro-glu from Q	Q1:Pyro-glu from Q:1000.00	PEAKS DB
10	A0A3Q7XNW1|A0A3Q7XNW1_CICAR	K.LSAEFGSLHK.N	N	43.59	1087.57	10	-10	544.79	2	49.54	2247100	1	16716	Banda_8_839.raw	1	1	361	370			PEAKS DB
10	A0A3Q7XNW1|A0A3Q7XNW1_CICAR	K.NAM(+15.99)FVPHYNLNANSILYALK.G	N	41.38	2308.17	20	20	770.398	3	54.15	2009300	1	19376	Banda_8_839.raw	1	1	371	390	Oxidation (M)	M3:Oxidation (M):1000.00	PEAKS DB
10	A0A3Q7XNW1|A0A3Q7XNW1_CICAR	R.LLGASSLINGM(+15.99)PEEVVAAAFNMER.N	Y	40.8	2534.25	24	5	845.758	3	56.86	678630	1	20034	Banda_8_839.raw	1	1	449	472	Oxidation (M)	M11:Oxidation (M):88.25	PEAKS DB
10	A0A3Q7XNW1|A0A3Q7XNW1_CICAR	L.NALEPDNR.I	N	35.62	927.441	8	-6	464.728	2	27.74	1021600	1	6811	Banda_8_839.raw	1	1	37	44			PEAKS DB
11	A0A1S2YBP2|A0A1S2YBP2_CICAR	K.SPIIVFEDVDLDK.V	N	76.51	1488.77	13	7	745.393	2	52.89	6459400	1	18355	Banda_8_839.raw	1	1	265	277			PEAKS DB
11	A0A1S2YBP2|A0A1S2YBP2_CICAR	R.LGPVISEAQYK.K	Y	76.44	1203.65	11	-1	602.832	2	44.84	0	1	14319	Banda_8_839.raw	0	0	333	343			PEAKS DB
11	A0A1S2YBP2|A0A1S2YBP2_CICAR	K.IAFTGSSATGSR.I	Y	76.19	1153.57	12	1	577.794	2	36.52	15876000	1	10686	Banda_8_839.raw	1	1	234	245			PEAKS DB
11	A0A1S2YBP2|A0A1S2YBP2_CICAR	K.APVSLPLETFK.S	Y	64.75	1200.68	11	22	601.346	2	50.84	11423000	1	17260	Banda_8_839.raw	1	1	134	144			PEAKS DB
11	A0A1S2YBP2|A0A1S2YBP2_CICAR	R.EEVFGPVLAVK.T	Y	63.25	1186.66	11	11	594.338	2	50.52	17601000	1	17569	Banda_8_839.raw	1	1	392	402			PEAKS DB
11	A0A1S2YBP2|A0A1S2YBP2_CICAR	R.LIVHESIASEFVNR.L	Y	61.76	1612.86	14	8	538.627	3	52.62	732880	1	18286	Banda_8_839.raw	1	1	300	313			PEAKS DB
11	A0A1S2YBP2|A0A1S2YBP2_CICAR	K.NEGATILTGGR.R	Y	61.46	1087.56	11	3	544.788	2	40.6	16801000	1	12288	Banda_8_839.raw	1	1	354	364			PEAKS DB
11	A0A1S2YBP2|A0A1S2YBP2_CICAR	K.EDVDLAVDAAK.R	Y	59.26	1144.56	11	4	573.288	2	36.37	3338700	1	10413	Banda_8_839.raw	1	1	45	55			PEAKS DB
11	A0A1S2YBP2|A0A1S2YBP2_CICAR	R.ELGEWGLDNYLSVK.Q	N	58.09	1621.8	14	13	811.908	2	53.41	5029900	1	18664	Banda_8_839.raw	1	1	470	483			PEAKS DB
11	A0A1S2YBP2|A0A1S2YBP2_CICAR	K.Q(-17.03)KAPVSLPLETFK.S	Y	57.3	1439.8	13	5	720.909	2	50.49	4768800	1	17138	Banda_8_839.raw	1	1	132	144	Pyro-glu from Q	Q1:Pyro-glu from Q:1000.00	PEAKS DB
11	A0A1S2YBP2|A0A1S2YBP2_CICAR	K.ISDPLEEGC(+57.02)R.L	N	53.99	1174.53	10	16	588.273	2	40.31	6594300	1	11913	Banda_8_839.raw	1	1	323	332	Carbamidomethylation	C9:Carbamidomethylation:1000.00	PEAKS DB
11	A0A1S2YBP2|A0A1S2YBP2_CICAR	K.VLNFISTAK.N	Y	53.08	991.57	9	1	496.792	2	48.92	8808100	1	16652	Banda_8_839.raw	1	1	345	353			PEAKS DB
11	A0A1S2YBP2|A0A1S2YBP2_CICAR	R.IPIINPSTQNIIGDIPAATKEDVDLAVDAAK.R	Y	45.1	3201.71	31	13	1068.25	3	54.76	5328900	1	19282	Banda_8_839.raw	1	1	25	55			PEAKS DB
11	A0A1S2YBP2|A0A1S2YBP2_CICAR	R.QLFIDGEWR.V	Y	42.47	1162.58	9	-14	582.295	2	51.64	792240	1	17679	Banda_8_839.raw	1	1	9	17			PEAKS DB
11	A0A1S2YBP2|A0A1S2YBP2_CICAR	R.Q(-17.03)LFIDGEWR.V	Y	41.06	1145.55	9	2	573.783	2	53.64	1504900	1	18873	Banda_8_839.raw	1	1	9	17	Pyro-glu from Q	Q1:Pyro-glu from Q:1000.00	PEAKS DB
11	A0A1S2YBP2|A0A1S2YBP2_CICAR	K.E(-18.01)DVDLAVDAAK.R	Y	37.76	1126.55	11	-3	564.282	2	36.72	46788	1	10638	Banda_8_839.raw	1	1	45	55	Pyro-glu from E	E1:Pyro-glu from E:1000.00	PEAKS DB
11	A0A1S2YBP2|A0A1S2YBP2_CICAR	R.DWSNASGSVR.A	Y	37.13	1077.48	10	17	539.75	2	32.76	5681600	1	8080	Banda_8_839.raw	1	1	65	74			PEAKS DB
11	A0A1S2YBP2|A0A1S2YBP2_CICAR	R.YISDEQWGWYQSPSK.L	Y	34.35	1872.83	15	17	937.425	2	49.04	1490200	1	16388	Banda_8_839.raw	1	1	488	502			PEAKS DB
13	A0A1S2XET4|A0A1S2XET4_CICAR	R.IQAQGPGNQVDQGR.G	Y	81.77	1466.72	14	8	734.369	2	26.42	7093300	1	6190	Banda_8_839.raw	1	1	475	488			PEAKS DB
13	A0A1S2XET4|A0A1S2XET4_CICAR	K.TAAEYVSPVAEK.T	Y	78.22	1263.63	12	4	632.825	2	34.51	4341300	1	9454	Banda_8_839.raw	1	1	339	350			PEAKS DB
13	A0A1S2XET4|A0A1S2XET4_CICAR	K.AAANVVEGAAR.Y	Y	66.08	1027.54	11	6	514.778	2	29.48	20999000	1	7490	Banda_8_839.raw	1	1	383	393			PEAKS DB
13	A0A1S2XET4|A0A1S2XET4_CICAR	K.GLAASAGESAK.E	Y	60.7	960.487	11	2	481.251	2	27.41	10772000	1	6275	Banda_8_839.raw	2	2	412	422			PEAKS DB
13	A0A1S2XET4|A0A1S2XET4_CICAR	K.TELGTGQVVAEK.A	Y	57.5	1230.65	12	2	616.33	2	33.08	7753200	1	9046	Banda_8_839.raw	1	1	153	164			PEAKS DB
13	A0A1S2XET4|A0A1S2XET4_CICAR	K.VIVVGEGDVEEK.Q	Y	57.01	1271.66	12	3	636.838	2	35.17	9457400	1	10018	Banda_8_839.raw	2	2	625	636			PEAKS DB
13	A0A1S2XET4|A0A1S2XET4_CICAR	K.GEQNFGTGR.L	Y	54.69	964.436	9	-8	483.225	2	27.45	4568300	1	6729	Banda_8_839.raw	1	1	168	176			PEAKS DB
13	A0A1S2XET4|A0A1S2XET4_CICAR	R.LGYGAENER.A	Y	46.88	1007.47	9	-3	504.741	2	30.84	8456700	1	7935	Banda_8_839.raw	2	2	177	185			PEAKS DB
13	A0A1S2XET4|A0A1S2XET4_CICAR	K.SQQGYEATK.D	Y	46.06	1010.47	9	-8	506.24	2	23.6	1172800	1	4711	Banda_8_839.raw	1	1	289	297			PEAKS DB
13	A0A1S2XET4|A0A1S2XET4_CICAR	K.NLESTEQGK.G	Y	45.88	1004.48	9	15	503.247	2	25.45	1167500	1	5490	Banda_8_839.raw	1	1	559	567			PEAKS DB
13	A0A1S2XET4|A0A1S2XET4_CICAR	K.GQQGYVATK.D	Y	43.35	950.482	9	-10	476.248	2	25.43	0	1	5628	Banda_8_839.raw	0	0	322	330			PEAKS DB
13	A0A1S2XET4|A0A1S2XET4_CICAR	K.DTVSSVAK.T	Y	43.15	805.418	8	-4	403.716	2	24.9	3429800	1	5481	Banda_8_839.raw	1	1	331	338			PEAKS DB
13	A0A1S2XET4|A0A1S2XET4_CICAR	R.NQAQENAM(+15.99)EAISGAQER.Y	Y	42.93	1861.82	17	13	931.92	2	31.08	1667800	1	8001	Banda_8_839.raw	1	1	222	238	Oxidation (M)	M8:Oxidation (M):1000.00	PEAKS DB
13	A0A1S2XET4|A0A1S2XET4_CICAR	K.ATAAGWTAAHYSTQLTVDGTK.A	Y	41.32	2149.04	21	6	717.356	3	49.89	4815700	1	17198	Banda_8_839.raw	2	2	362	382			PEAKS DB
13	A0A1S2XET4|A0A1S2XET4_CICAR	K.KPIENM(+15.99)TSSGNQVDQGGGSNVVSGIGETVGK.L	Y	41.05	3061.46	31	43	1021.5	3	46.57	422360	1	15063	Banda_8_839.raw	1	1	509	539	Oxidation (M)	M6:Oxidation (M):1000.00	PEAKS DB
13	A0A1S2XET4|A0A1S2XET4_CICAR	R.DVGNFEVESK.G	Y	40.34	1122.52	10	5	562.267	2	35.32	395800	1	9786	Banda_8_839.raw	1	1	111	120			PEAKS DB
13	A0A1S2XET4|A0A1S2XET4_CICAR	K.KPTNETLTNTTQTAQGK.E	Y	39.53	1831.93	17	-53	916.966	2	41.16	35896	1	12570	Banda_8_839.raw	1	1	244	260			PEAKS DB
13	A0A1S2XET4|A0A1S2XET4_CICAR	R.LTLEEISK.Y	Y	39.09	931.523	8	4	466.769	2	46.02	6151900	1	14596	Banda_8_839.raw	1	1	212	219			PEAKS DB
13	A0A1S2XET4|A0A1S2XET4_CICAR	R.GSNVVSSIGETVGK.L	Y	33.61	1332.69	14	4	667.352	2	42.43	8530600	1	13011	Banda_8_839.raw	1	1	489	502			PEAKS DB
14	sp|Q9SMJ4|LEG_CICAR	R.LHQNIGSSSSPDIYNPQAGR.I	N	86.56	2140.03	20	4	714.351	3	47.47	19807000	1	15920	Banda_8_839.raw	2	2	322	341			PEAKS DB
14	sp|Q9SMJ4|LEG_CICAR	R.YQQEGSEEEENEGGNIFSGFK.R	Y	82.01	2377	21	-2	1189.51	2	48.24	14084000	1	16190	Banda_8_839.raw	1	1	194	214			PEAKS DB
14	sp|Q9SMJ4|LEG_CICAR	R.DFLEDALNVNR.R	N	68.15	1304.64	11	8	653.326	2	51.98	65771000	1	18293	Banda_8_839.raw	2	2	216	226			PEAKS DB
14	sp|Q9SMJ4|LEG_CICAR	R.DNGFEETIC(+57.02)TAR.L	N	68.05	1411.6	12	4	706.809	2	39.63	0	1	11942	Banda_8_839.raw	0	0	310	321	Carbamidomethylation	C9:Carbamidomethylation:1000.00	PEAKS DB
14	sp|Q9SMJ4|LEG_CICAR	K.GNSVFDGELEAGR.A	N	65.42	1349.62	13	10	675.818	2	45.5	8826200	1	14699	Banda_8_839.raw	1	1	400	412			PEAKS DB
14	sp|Q9SMJ4|LEG_CICAR	K.SEGGLIETWNPSNK.Q	N	61.46	1530.73	14	15	766.374	2	47.45	26548000	1	15737	Banda_8_839.raw	1	1	47	60			PEAKS DB
14	sp|Q9SMJ4|LEG_CICAR	A.C(+57.02)AGVALSR.A	N	51.84	832.423	8	-3	417.218	2	32.06	9304800	1	8908	Banda_8_839.raw	1	1	64	71	Carbamidomethylation	C1:Carbamidomethylation:1000.00	PEAKS DB
14	sp|Q9SMJ4|LEG_CICAR	R.FSYVAFK.T	N	51	860.443	7	10	431.229	2	49.12	75993000	1	16624	Banda_8_839.raw	2	2	431	437			PEAKS DB
14	sp|Q9SMJ4|LEG_CICAR	R.Q(-17.03)DEDEDEKR.Q	N	47.75	1145.45	9	7	573.731	2	20.27	7112300	1	3388	Banda_8_839.raw	2	2	287	295	Pyro-glu from Q	Q1:Pyro-glu from Q:1000.00	PEAKS DB
14	sp|Q9SMJ4|LEG_CICAR	K.LSAEFGSLHK.N	N	43.59	1087.57	10	-10	544.79	2	49.54	2247100	1	16716	Banda_8_839.raw	1	1	358	367			PEAKS DB
14	sp|Q9SMJ4|LEG_CICAR	K.NAM(+15.99)FVPHYNLNANSILYALK.G	N	41.38	2308.17	20	20	770.398	3	54.15	2009300	1	19376	Banda_8_839.raw	1	1	368	387	Oxidation (M)	M3:Oxidation (M):1000.00	PEAKS DB
12	A0A1S2XYZ0|A0A1S2XYZ0_CICAR	R.IVDLAIPINTPAK.F	Y	81.27	1363.81	13	0	682.911	2	49.56	14875000	1	16702	Banda_8_839.raw	1	1	266	278			PEAKS DB
12	A0A1S2XYZ0|A0A1S2XYZ0_CICAR	R.E(-18.01)EEEETSSESQGR.R	Y	67.41	1477.58	13	0	739.798	2	18.08	38501	1	2809	Banda_8_839.raw	1	1	140	152	Pyro-glu from E	E1:Pyro-glu from E:1000.00	PEAKS DB
12	A0A1S2XYZ0|A0A1S2XYZ0_CICAR	K.ELAFPGSAQEVDR.L	Y	66.95	1417.68	13	7	709.85	2	46.09	9375300	1	15162	Banda_8_839.raw	1	1	514	526			PEAKS DB
12	A0A1S2XYZ0|A0A1S2XYZ0_CICAR	R.Q(-17.03)QSQEAEVIVK.V	Y	66.33	1240.63	11	-1	621.322	2	30.47	5844700	1	7750	Banda_8_839.raw	1	1	331	341	Pyro-glu from Q	Q1:Pyro-glu from Q:1000.00	PEAKS DB
12	A0A1S2XYZ0|A0A1S2XYZ0_CICAR	R.Q(-17.03)SHFANAQSQGSQR.R	Y	62.62	1527.68	14	13	764.849	2	27.13	161500	1	7016	Banda_8_839.raw	1	1	533	546	Pyro-glu from Q	Q1:Pyro-glu from Q:1000.00	PEAKS DB
12	A0A1S2XYZ0|A0A1S2XYZ0_CICAR	R.NSFNLEC(+57.02)GDTIK.L	Y	57.31	1396.63	12	16	699.323	2	44.11	1383200	1	13853	Banda_8_839.raw	1	1	235	246	Carbamidomethylation	C7:Carbamidomethylation:1000.00	PEAKS DB
12	A0A1S2XYZ0|A0A1S2XYZ0_CICAR	K.LPAGTIAYLANR.D	N	55.69	1258.7	12	3	630.359	2	49.22	10823000	1	16786	Banda_8_839.raw	1	1	247	258			PEAKS DB
12	A0A1S2XYZ0|A0A1S2XYZ0_CICAR	R.NFLAGEDDNVISQIERPVK.E	Y	55.49	2143.09	19	8	715.371	3	52.69	3650200	1	18295	Banda_8_839.raw	1	1	495	513			PEAKS DB
12	A0A1S2XYZ0|A0A1S2XYZ0_CICAR	R.EQIEELSK.H	N	52.68	974.492	8	-6	975.499	1	31.11	118670000	1	8091	Banda_8_839.raw	2	2	345	352			PEAKS DB
12	A0A1S2XYZ0|A0A1S2XYZ0_CICAR	K.AILTVLNSNDR.N	Y	50.83	1214.66	11	4	608.338	2	49	7268700	1	16214	Banda_8_839.raw	1	1	224	234			PEAKS DB
12	A0A1S2XYZ0|A0A1S2XYZ0_CICAR	R.ATM(+15.99)VVVVNEGK.G	Y	46.37	1161.61	11	14	581.811	2	30	3035300	1	7813	Banda_8_839.raw	1	1	422	432	Oxidation (M)	M3:Oxidation (M):1000.00	PEAKS DB
12	A0A1S2XYZ0|A0A1S2XYZ0_CICAR	K.GNFELVGLR.N	Y	41.62	1003.54	9	6	502.78	2	50.44	6263300	1	17036	Banda_8_839.raw	1	1	433	441			PEAKS DB
12	A0A1S2XYZ0|A0A1S2XYZ0_CICAR	R.SPIYSNK.F	Y	41.21	807.413	7	6	404.714	2	27.93	3527500	1	6652	Banda_8_839.raw	1	1	375	381			PEAKS DB
12	A0A1S2XYZ0|A0A1S2XYZ0_CICAR	R.ATMVVVVNEGK.G	Y	40.2	1145.61	11	4	573.813	2	40.3	313500	1	12401	Banda_8_839.raw	1	1	422	432			PEAKS DB
12	A0A1S2XYZ0|A0A1S2XYZ0_CICAR	R.QQSQEAEVIVK.V	Y	39.47	1257.66	11	9	629.836	2	31.91	4578600	1	8536	Banda_8_839.raw	1	1	331	341			PEAKS DB
12	A0A1S2XYZ0|A0A1S2XYZ0_CICAR	R.E(-18.01)QIEELSK.H	N	39.14	956.481	8	2	479.248	2	31.46	2365800	1	8339	Banda_8_839.raw	1	1	345	352	Pyro-glu from E	E1:Pyro-glu from E:1000.00	PEAKS DB
12	A0A1S2XYZ0|A0A1S2XYZ0_CICAR	R.DSNEDLR.I	Y	38.1	847.367	7	4	424.691	2	17.78	2546600	1	2700	Banda_8_839.raw	2	2	259	265			PEAKS DB
18	A0A1S2XBN2|A0A1S2XBN2_CICAR	K.EHLEPNLEGLTVEEAIQNK.K	Y	79.36	2162.09	19	17	721.704	3	51.98	3124600	1	18000	Banda_8_839.raw	2	2	408	426			PEAKS DB
18	A0A1S2XBN2|A0A1S2XBN2_CICAR	M(+42.01)FSGVTGLLNR.G	Y	73.59	1235.63	11	0	618.824	2	56.36	576630	1	20139	Banda_8_839.raw	1	1	1	11	Acetylation (Protein N-term)	M1:Acetylation (Protein N-term):1000.00	PEAKS DB
18	A0A1S2XBN2|A0A1S2XBN2_CICAR	R.DTM(+15.99)NINALAR.Q	N	59.38	1133.55	10	0	567.782	2	33.54	4722900	1	9055	Banda_8_839.raw	1	1	557	566	Oxidation (M)	M3:Oxidation (M):1000.00	PEAKS DB
18	A0A1S2XBN2|A0A1S2XBN2_CICAR	R.SVSLQLISATK.S	N	59.37	1145.67	11	4	573.84	2	48.32	10984000	1	16302	Banda_8_839.raw	2	2	60	70			PEAKS DB
18	A0A1S2XBN2|A0A1S2XBN2_CICAR	R.Q(-17.03)SLVNDGGIIEK.T	Y	59.13	1254.65	12	5	628.33	2	38.04	2803200	1	11316	Banda_8_839.raw	1	1	567	578	Pyro-glu from Q	Q1:Pyro-glu from Q:1000.00	PEAKS DB
18	A0A1S2XBN2|A0A1S2XBN2_CICAR	K.SSDFLTYALK.A	Y	56.06	1143.58	10	6	572.798	2	51.17	2343300	1	17473	Banda_8_839.raw	1	1	272	281			PEAKS DB
18	A0A1S2XBN2|A0A1S2XBN2_CICAR	K.DWVFTEQALPNDLVK.R	Y	44.05	1773.89	15	22	887.956	2	53.17	2475600	1	18512	Banda_8_839.raw	1	1	596	610			PEAKS DB
18	A0A1S2XBN2|A0A1S2XBN2_CICAR	R.TDGEQVLK.Y	N	42.57	888.455	8	5	445.235	2	25.34	16479000	1	6906	Banda_8_839.raw	2	2	341	348			PEAKS DB
18	A0A1S2XBN2|A0A1S2XBN2_CICAR	K.LPTDIISK.I	Y	42.45	885.517	8	0	443.766	2	43.5	9546900	1	13784	Banda_8_839.raw	1	1	321	328			PEAKS DB
18	A0A1S2XBN2|A0A1S2XBN2_CICAR	K.GSSEYDELVK.S	Y	38.42	1125.52	10	21	563.768	2	38.56	2594400	1	11666	Banda_8_839.raw	1	1	742	751			PEAKS DB
18	A0A1S2XBN2|A0A1S2XBN2_CICAR	R.EEELHNLR.G	N	34.51	1038.51	8	-70	520.258	2	48.97	567940	1	15863	Banda_8_839.raw	1	1	184	191			PEAKS DB
16	A0A1S2XZF3|A0A1S2XZF3_CICAR	R.VILDGSPENPLEFVQVQIANVESR.F	Y	78.69	2652.38	24	14	885.134	3	57.85	1543800	1	20930	Banda_8_839.raw	1	1	461	484			PEAKS DB
16	A0A1S2XZF3|A0A1S2XZF3_CICAR	R.FASAISDSGEITVEGR.V	Y	63.51	1637.79	16	13	819.903	2	44.69	7117500	1	14136	Banda_8_839.raw	1	1	485	500			PEAKS DB
16	A0A1S2XZF3|A0A1S2XZF3_CICAR	R.LAVQLVAGGSGVK.T	Y	62.39	1197.71	13	6	599.862	2	46.32	11145000	1	15136	Banda_8_839.raw	1	1	391	403			PEAKS DB
16	A0A1S2XZF3|A0A1S2XZF3_CICAR	R.IGDVPAVEEFVFLK.L	Y	57.88	1561.84	14	10	781.928	2	55.42	2404600	1	19642	Banda_8_839.raw	1	1	582	595			PEAKS DB
16	A0A1S2XZF3|A0A1S2XZF3_CICAR	K.GLGM(+15.99)NVIAHDPYAPADR.A	Y	56.14	1811.86	17	2	604.962	3	50.55	193300	1	17277	Banda_8_839.raw	1	1	214	230	Oxidation (M)	M4:Oxidation (M):1000.00	PEAKS DB
16	A0A1S2XZF3|A0A1S2XZF3_CICAR	K.Q(-17.03)AVM(+15.99)AIGVDDQPR.K	Y	55.16	1397.66	13	8	699.838	2	34.06	649820	1	9289	Banda_8_839.raw	1	1	563	575	Pyro-glu from Q; Oxidation (M)	Q1:Pyro-glu from Q:1000.00;M4:Oxidation (M):1000.00	PEAKS DB
16	A0A1S2XZF3|A0A1S2XZF3_CICAR	R.APDDLDTR.L	Y	49.96	901.414	8	5	451.714	2	27.37	8973700	1	6689	Banda_8_839.raw	2	2	414	421			PEAKS DB
16	A0A1S2XZF3|A0A1S2XZF3_CICAR	R.NVAQADASVK.A	Y	45.03	1001.51	10	9	501.765	2	26.05	10363000	1	5933	Banda_8_839.raw	1	1	168	177			PEAKS DB
16	A0A1S2XZF3|A0A1S2XZF3_CICAR	K.QAVM(+15.99)AIGVDDQPR.K	Y	43.75	1414.69	13	3	708.351	2	34.08	525750	1	9554	Banda_8_839.raw	2	2	563	575	Oxidation (M)	M4:Oxidation (M):1000.00	PEAKS DB
16	A0A1S2XZF3|A0A1S2XZF3_CICAR	K.M(+15.99)LNDETFAK.M	Y	41.78	1083.49	9	3	542.753	2	35.45	717700	1	10870	Banda_8_839.raw	1	1	264	272	Oxidation (M)	M1:Oxidation (M):1000.00	PEAKS DB
16	A0A1S2XZF3|A0A1S2XZF3_CICAR	R.ALDSGIVAQAALDVFTVEPPATDSK.L	Y	36.51	2514.29	25	5	1258.15	2	55.51	871690	1	19685	Banda_8_839.raw	1	1	296	320			PEAKS DB
16	A0A1S2XZF3|A0A1S2XZF3_CICAR	K.YVGVSLVGK.T	Y	34.5	920.533	9	-6	461.274	2	46.74	6640100	1	15682	Banda_8_839.raw	1	1	186	194			PEAKS DB
15	A0A3Q7YAD4|A0A3Q7YAD4_CICAR	K.SNLDPTIYGDQTSK.I	Y	72.38	1537.73	14	13	769.871	2	36.54	3636700	1	10399	Banda_8_839.raw	1	1	391	404			PEAKS DB
15	A0A3Q7YAD4|A0A3Q7YAD4_CICAR	K.LPLDVISTISPLPVIK.E	Y	68.89	1704.04	16	5	853.029	2	55.97	4804400	1	19907	Banda_8_839.raw	2	2	321	336			PEAKS DB
15	A0A3Q7YAD4|A0A3Q7YAD4_CICAR	K.NWVFPDQALPNDLIK.R	Y	63.32	1768.91	15	10	885.466	2	54.06	897760	1	19199	Banda_8_839.raw	1	1	594	608			PEAKS DB
15	A0A3Q7YAD4|A0A3Q7YAD4_CICAR	K.TYLPSETPSPLVK.Y	Y	59.68	1430.77	13	4	716.39	2	46.53	4794700	1	15267	Banda_8_839.raw	1	1	170	182			PEAKS DB
15	A0A3Q7YAD4|A0A3Q7YAD4_CICAR	R.DTM(+15.99)NINALAR.Q	N	59.38	1133.55	10	0	567.782	2	33.54	4722900	1	9055	Banda_8_839.raw	1	1	555	564	Oxidation (M)	M3:Oxidation (M):1000.00	PEAKS DB
15	A0A3Q7YAD4|A0A3Q7YAD4_CICAR	R.SVSLQLISATK.S	N	59.37	1145.67	11	4	573.84	2	48.32	10984000	1	16302	Banda_8_839.raw	2	2	65	75			PEAKS DB
15	A0A3Q7YAD4|A0A3Q7YAD4_CICAR	M(+42.01)FSGVTGILNK.G	Y	56.69	1207.63	11	10	604.821	2	54.24	416960	1	19193	Banda_8_839.raw	1	1	1	11	Acetylation (Protein N-term)	M1:Acetylation (Protein N-term):1000.00	PEAKS DB
15	A0A3Q7YAD4|A0A3Q7YAD4_CICAR	K.SEKPATEVYVPR.D	Y	45.26	1374.71	12	3	459.245	3	48.29	3370500	1	15797	Banda_8_839.raw	1	1	253	264			PEAKS DB
15	A0A3Q7YAD4|A0A3Q7YAD4_CICAR	K.NVLDYNTIISIGGGNVR.G	Y	44.33	1803.95	17	-35	902.978	2	51.7	2938700	1	18080	Banda_8_839.raw	1	1	25	41			PEAKS DB
15	A0A3Q7YAD4|A0A3Q7YAD4_CICAR	R.KNVLDYNTIISIGGGNVR.G	Y	42.59	1932.04	18	1	645.022	3	52.56	371830	1	18299	Banda_8_839.raw	1	1	24	41			PEAKS DB
15	A0A3Q7YAD4|A0A3Q7YAD4_CICAR	R.TDGEQVLK.F	N	42.57	888.455	8	5	445.235	2	25.34	16479000	1	6906	Banda_8_839.raw	2	2	341	348			PEAKS DB
15	A0A3Q7YAD4|A0A3Q7YAD4_CICAR	R.EEELHNLR.G	N	34.51	1038.51	8	-70	520.258	2	48.97	567940	1	15863	Banda_8_839.raw	1	1	185	192			PEAKS DB
23	A0A1S2XQR4|A0A1S2XQR4_CICAR	N.FFEITPEK.N	N	59.79	1009.51	8	5	1010.52	1	48.76	63044000	1	16385	Banda_8_839.raw	2	2	266	273			PEAKS DB
23	A0A1S2XQR4|A0A1S2XQR4_CICAR	K.ILEASFNSDYEEIER.V	N	59.01	1813.84	15	-2	907.926	2	48.05	7084500	1	16128	Banda_8_839.raw	1	1	176	190			PEAKS DB
23	A0A1S2XQR4|A0A1S2XQR4_CICAR	R.AILTVLNPNDR.N	N	58.95	1224.68	11	-6	613.348	2	49.89	81444000	1	17114	Banda_8_839.raw	1	1	99	109			PEAKS DB
23	A0A1S2XQR4|A0A1S2XQR4_CICAR	R.SQLFENLQNYR.L	N	56.42	1410.69	11	-16	706.351	2	49.47	5208700	1	16465	Banda_8_839.raw	1	1	59	69			PEAKS DB
23	A0A1S2XQR4|A0A1S2XQR4_CICAR	K.LPAGTIAYLANR.D	N	55.69	1258.7	12	3	630.359	2	49.22	10823000	1	16786	Banda_8_839.raw	1	1	122	133			PEAKS DB
23	A0A1S2XQR4|A0A1S2XQR4_CICAR	R.EQIEELSK.N	N	52.68	974.492	8	-6	975.499	1	31.11	118670000	1	8091	Banda_8_839.raw	2	2	226	233			PEAKS DB
23	A0A1S2XQR4|A0A1S2XQR4_CICAR	R.Q(-17.03)SHFANAQPQQK.D	N	51.42	1365.64	12	6	683.829	2	27.64	1784200	1	6457	Banda_8_839.raw	1	1	426	437	Pyro-glu from Q	Q1:Pyro-glu from Q:1000.00	PEAKS DB
23	A0A1S2XQR4|A0A1S2XQR4_CICAR	R.NFLAGEEDNVISQIQRPVK.E	N	50.12	2156.12	19	2	719.715	3	52.64	2505600	1	18313	Banda_8_839.raw	1	1	388	406			PEAKS DB
23	A0A1S2XQR4|A0A1S2XQR4_CICAR	K.YGNFFEITPEK.N	Y	47.66	1343.64	11	5	672.827	2	51.01	3554600	1	17548	Banda_8_839.raw	1	1	263	273			PEAKS DB
23	A0A1S2XQR4|A0A1S2XQR4_CICAR	K.EVAFPGSAEEVDR.L	N	47.44	1404.65	13	8	703.334	2	42.54	6971700	1	13171	Banda_8_839.raw	1	1	407	419			PEAKS DB
23	A0A1S2XQR4|A0A1S2XQR4_CICAR	R.SRNPIYSNK.Y	N	45.52	1077.56	9	4	539.786	2	47.36	14416000	1	15592	Banda_8_839.raw	1	1	254	262			PEAKS DB
23	A0A1S2XQR4|A0A1S2XQR4_CICAR	R.SVSSESEPFNLR.S	N	44.72	1350.64	12	9	676.329	2	45.92	8574900	1	15216	Banda_8_839.raw	1	1	242	253			PEAKS DB
23	A0A1S2XQR4|A0A1S2XQR4_CICAR	R.Q(-17.03)EADVIVK.I	Y	40.14	883.465	8	7	884.473	1	31.59	1244100	1	8145	Banda_8_839.raw	1	1	215	222	Pyro-glu from Q	Q1:Pyro-glu from Q:1000.00	PEAKS DB
23	A0A1S2XQR4|A0A1S2XQR4_CICAR	R.DDNEDLR.V	N	40.02	875.362	7	3	438.688	2	17.86	1653500	1	2718	Banda_8_839.raw	2	2	134	140			PEAKS DB
23	A0A1S2XQR4|A0A1S2XQR4_CICAR	R.E(-18.01)QIEELSK.N	N	39.14	956.481	8	2	479.248	2	31.46	2365800	1	8339	Banda_8_839.raw	1	1	226	233	Pyro-glu from E	E1:Pyro-glu from E:1000.00	PEAKS DB
24	A0A1S2XQ88|A0A1S2XQ88_CICAR	N.FFEITPEK.N	N	59.79	1009.51	8	5	1010.52	1	48.76	63044000	1	16385	Banda_8_839.raw	2	2	264	271			PEAKS DB
24	A0A1S2XQ88|A0A1S2XQ88_CICAR	K.ILEASFNSDYEEIER.V	N	59.01	1813.84	15	-2	907.926	2	48.05	7084500	1	16128	Banda_8_839.raw	1	1	176	190			PEAKS DB
24	A0A1S2XQ88|A0A1S2XQ88_CICAR	R.AILTVLNPNDR.N	N	58.95	1224.68	11	-6	613.348	2	49.89	81444000	1	17114	Banda_8_839.raw	1	1	99	109			PEAKS DB
24	A0A1S2XQ88|A0A1S2XQ88_CICAR	R.SQLFENLQNYR.L	N	56.42	1410.69	11	-16	706.351	2	49.47	5208700	1	16465	Banda_8_839.raw	1	1	59	69			PEAKS DB
24	A0A1S2XQ88|A0A1S2XQ88_CICAR	K.LPAGTIAYLANR.D	N	55.69	1258.7	12	3	630.359	2	49.22	10823000	1	16786	Banda_8_839.raw	1	1	122	133			PEAKS DB
24	A0A1S2XQ88|A0A1S2XQ88_CICAR	R.EQIEELSK.N	N	52.68	974.492	8	-6	975.499	1	31.11	118670000	1	8091	Banda_8_839.raw	2	2	224	231			PEAKS DB
24	A0A1S2XQ88|A0A1S2XQ88_CICAR	R.Q(-17.03)SHFANAQPQQK.R	N	51.42	1365.64	12	6	683.829	2	27.64	1784200	1	6457	Banda_8_839.raw	1	1	424	435	Pyro-glu from Q	Q1:Pyro-glu from Q:1000.00	PEAKS DB
24	A0A1S2XQ88|A0A1S2XQ88_CICAR	R.NFLAGEEDNVISQIQRPVK.E	N	50.12	2156.12	19	2	719.715	3	52.64	2505600	1	18313	Banda_8_839.raw	1	1	386	404			PEAKS DB
24	A0A1S2XQ88|A0A1S2XQ88_CICAR	K.EVAFPGSAEEVDR.L	N	47.44	1404.65	13	8	703.334	2	42.54	6971700	1	13171	Banda_8_839.raw	1	1	405	417			PEAKS DB
24	A0A1S2XQ88|A0A1S2XQ88_CICAR	K.SVSSESEPFNLR.S	N	44.72	1350.64	12	9	676.329	2	45.92	8574900	1	15216	Banda_8_839.raw	1	1	240	251			PEAKS DB
24	A0A1S2XQ88|A0A1S2XQ88_CICAR	R.DDNEDLR.V	N	40.02	875.362	7	3	438.688	2	17.86	1653500	1	2718	Banda_8_839.raw	2	2	134	140			PEAKS DB
24	A0A1S2XQ88|A0A1S2XQ88_CICAR	R.E(-18.01)QIEELSK.N	N	39.14	956.481	8	2	479.248	2	31.46	2365800	1	8339	Banda_8_839.raw	1	1	224	231	Pyro-glu from E	E1:Pyro-glu from E:1000.00	PEAKS DB
24	A0A1S2XQ88|A0A1S2XQ88_CICAR	R.QQSQETDVIVK.I	Y	36.38	1273.65	11	4	637.833	2	30.34	1814900	1	7586	Banda_8_839.raw	1	1	210	220			PEAKS DB
24	A0A1S2XQ88|A0A1S2XQ88_CICAR	F.SLSGNENQQSYFQGFSK.K	Y	35.56	1919.87	17	-5	960.939	2	46.13	51570	1	15086	Banda_8_839.raw	1	1	158	174			PEAKS DB
25	A0A1S3DXB5|A0A1S3DXB5_CICAR	K.VVAAGANPVLITR.G	N	67.74	1279.76	13	10	640.889	2	45.52	4553600	1	14505	Banda_8_839.raw	1	1	154	166			PEAKS DB
25	A0A1S3DXB5|A0A1S3DXB5_CICAR	K.LSGGVAVIQVGAQTETELK.E	N	56.64	1899.03	19	4	950.523	2	47.47	836820	1	15384	Banda_8_839.raw	1	1	419	437			PEAKS DB
25	A0A1S3DXB5|A0A1S3DXB5_CICAR	K.TNDLAGDGTTTSVVLAQGLIAEGVK.V	N	54.64	2429.26	25	6	810.763	3	51.92	1481700	1	17979	Banda_8_839.raw	1	1	129	153			PEAKS DB
25	A0A1S3DXB5|A0A1S3DXB5_CICAR	K.EVELEDPVENIGAK.L	N	54.19	1540.76	14	14	771.389	2	45.31	1954700	1	14570	Banda_8_839.raw	1	1	107	120			PEAKS DB
25	A0A1S3DXB5|A0A1S3DXB5_CICAR	R.GYISPYFVTDSEK.M	N	52.98	1504.71	13	-4	753.361	2	49.23	2565700	1	16450	Banda_8_839.raw	1	1	245	257			PEAKS DB
25	A0A1S3DXB5|A0A1S3DXB5_CICAR	K.SQYLDDIAILTGGTVIR.E	N	52.27	1833.98	17	18	918.001	2	55.02	331380	1	19493	Banda_8_839.raw	1	1	333	349			PEAKS DB
25	A0A1S3DXB5|A0A1S3DXB5_CICAR	K.LADLVGVTLGPK.G	N	51.77	1181.7	12	-1	591.858	2	50.47	2279500	1	17031	Banda_8_839.raw	1	1	71	82			PEAKS DB
25	A0A1S3DXB5|A0A1S3DXB5_CICAR	K.DTTTIVGDGSTQEAVNKR.V	Y	39.13	1890.93	18	21	631.318	3	43.54	2005800	1	13400	Banda_8_839.raw	1	1	375	392			PEAKS DB
25	A0A1S3DXB5|A0A1S3DXB5_CICAR	K.NAGVD(sub N)GSVVSEK.V	N	36.08	1160.57	12	-4	581.291	2	27.16	20800	1	6101	Banda_8_839.raw	1	1	506	517			SPIDER
25	A0A1S3DXB5|A0A1S3DXB5_CICAR	K.AAVEEGIVVGGGC(+57.02)TLLR.L	N	35.55	1699.89	17	-30	850.951	2	49.04	111330	1	16309	Banda_8_839.raw	1	1	452	468	Carbamidomethylation	C13:Carbamidomethylation:1000.00	PEAKS DB
25	A0A1S3DXB5|A0A1S3DXB5_CICAR	K.NQIEVAEQDYEKEK.L	Y	33.59	1721.81	14	-4	574.944	3	47.42	1183500	1	15611	Banda_8_839.raw	1	1	398	411			PEAKS DB
29	A0A1S2XDU8|A0A1S2XDU8_CICAR	R.EGLQAQPQFPTSVQSSSIVER.K	Y	68.77	2287.14	21	0	1144.58	2	45.25	2870900	1	14584	Banda_8_839.raw	2	2	51	71			PEAKS DB
29	A0A1S2XDU8|A0A1S2XDU8_CICAR	R.SPPIEEVIQSGVVPR.F	Y	68.37	1605.87	15	19	803.945	2	50.25	6090300	1	16913	Banda_8_839.raw	2	2	107	121			PEAKS DB
29	A0A1S2XDU8|A0A1S2XDU8_CICAR	R.EQAVWALGNVAGDSPR.C	N	67.01	1668.82	16	5	835.419	2	48.73	390700	1	16192	Banda_8_839.raw	1	1	178	193			PEAKS DB
29	A0A1S2XDU8|A0A1S2XDU8_CICAR	K.IQAVIEAGVC(+57.02)GR.L	Y	54.76	1271.67	12	-43	636.837	2	43.88	3048800	1	13734	Banda_8_839.raw	2	2	279	290	Carbamidomethylation	C10:Carbamidomethylation:1000.00	PEAKS DB
29	A0A1S2XDU8|A0A1S2XDU8_CICAR	K.EAAWAISNATSGGTHEQIK.Y	Y	51.39	1969.95	19	9	657.658	3	49.29	1268200	1	16499	Banda_8_839.raw	1	1	390	408			PEAKS DB
29	A0A1S2XDU8|A0A1S2XDU8_CICAR	K.VAVDADEGR.R	Y	45.13	930.441	9	2	466.228	2	17.95	40408	1	2756	Banda_8_839.raw	1	1	18	26			PEAKS DB
29	A0A1S2XDU8|A0A1S2XDU8_CICAR	R.IVTVC(+57.02)LEGLENILK.V	N	35.35	1599.89	14	7	800.953	2	55.19	1531200	1	19721	Banda_8_839.raw	1	1	430	443	Carbamidomethylation	C5:Carbamidomethylation:1000.00	PEAKS DB
29	A0A1S2XDU8|A0A1S2XDU8_CICAR	K.VVIDHGAVPIFVK.L	Y	35.35	1392.81	13	-6	465.278	3	52.59	1832800	1	18329	Banda_8_839.raw	1	1	155	167			PEAKS DB
29	A0A1S2XDU8|A0A1S2XDU8_CICAR	R.FVEFLVR.E	Y	33.88	908.512	7	-12	455.263	2	52.57	0	1	18412	Banda_8_839.raw	0	0	122	128			PEAKS DB
28	A0A1S2Y3X0|A0A1S2Y3X0_CICAR	K.VVAAGANPVLITR.G	N	67.74	1279.76	13	10	640.889	2	45.52	4553600	1	14505	Banda_8_839.raw	1	1	153	165			PEAKS DB
28	A0A1S2Y3X0|A0A1S2Y3X0_CICAR	K.LSGGVAVIQVGAQTETELK.E	N	56.64	1899.03	19	4	950.523	2	47.47	836820	1	15384	Banda_8_839.raw	1	1	418	436			PEAKS DB
28	A0A1S2Y3X0|A0A1S2Y3X0_CICAR	K.TNDLAGDGTTTSVVLAQGLIAEGVK.V	N	54.64	2429.26	25	6	810.763	3	51.92	1481700	1	17979	Banda_8_839.raw	1	1	128	152			PEAKS DB
28	A0A1S2Y3X0|A0A1S2Y3X0_CICAR	K.EVELEDPVENIGAK.L	N	54.19	1540.76	14	14	771.389	2	45.31	1954700	1	14570	Banda_8_839.raw	1	1	106	119			PEAKS DB
28	A0A1S2Y3X0|A0A1S2Y3X0_CICAR	R.GYISPYFVTDSEK.M	N	52.98	1504.71	13	-4	753.361	2	49.23	2565700	1	16450	Banda_8_839.raw	1	1	244	256			PEAKS DB
28	A0A1S2Y3X0|A0A1S2Y3X0_CICAR	K.SQYLDDIAILTGGTVIR.E	N	52.27	1833.98	17	18	918.001	2	55.02	331380	1	19493	Banda_8_839.raw	1	1	332	348			PEAKS DB
28	A0A1S2Y3X0|A0A1S2Y3X0_CICAR	K.LADLVGVTLGPK.G	N	51.77	1181.7	12	-1	591.858	2	50.47	2279500	1	17031	Banda_8_839.raw	1	1	70	81			PEAKS DB
28	A0A1S2Y3X0|A0A1S2Y3X0_CICAR	R.EEVGLSLDK.A	Y	38.16	988.508	9	16	495.262	2	41.25	827650	1	12753	Banda_8_839.raw	1	1	349	357			PEAKS DB
28	A0A1S2Y3X0|A0A1S2Y3X0_CICAR	K.NAGVD(sub N)GSVVSEK.V	N	36.08	1160.57	12	-4	581.291	2	27.16	20800	1	6101	Banda_8_839.raw	1	1	505	516			SPIDER
28	A0A1S2Y3X0|A0A1S2Y3X0_CICAR	K.AAVEEGIVVGGGC(+57.02)TLLR.L	N	35.55	1699.89	17	-30	850.951	2	49.04	111330	1	16309	Banda_8_839.raw	1	1	451	467	Carbamidomethylation	C13:Carbamidomethylation:1000.00	PEAKS DB
39	A0A1S2XPC9|A0A1S2XPC9_CICAR	R.VSAANSRPPNPQ	Y	81.36	1236.62	12	7	619.318	2	17.78	10234000	1	2698	Banda_8_839.raw	2	2	592	603			PEAKS DB
39	A0A1S2XPC9|A0A1S2XPC9_CICAR	K.LSNQQGLEAAVEAAAEFLNK.A	Y	63.8	2102.06	20	12	701.696	3	57.8	2943600	1	20711	Banda_8_839.raw	2	2	229	248			PEAKS DB
39	A0A1S2XPC9|A0A1S2XPC9_CICAR	K.VVC(+57.02)EEELVEAIATATGPK.K	Y	52.17	1914.96	18	3	639.328	3	53.52	148500	1	18849	Banda_8_839.raw	1	1	548	565	Carbamidomethylation	C3:Carbamidomethylation:1000.00	PEAKS DB
39	A0A1S2XPC9|A0A1S2XPC9_CICAR	K.AIIVQPDR.V	Y	47.32	910.524	8	-4	456.269	2	38.96	12433000	1	11498	Banda_8_839.raw	1	1	344	351			PEAKS DB
39	A0A1S2XPC9|A0A1S2XPC9_CICAR	K.ELLEWGSR.V	N	42.98	988.498	8	-7	495.256	2	49.78	2199100	1	16851	Banda_8_839.raw	1	1	584	591			PEAKS DB
39	A0A1S2XPC9|A0A1S2XPC9_CICAR	R.DPVPFSLSPK.L	Y	37.89	1085.58	10	-8	543.795	2	47.38	0	1	15603	Banda_8_839.raw	0	0	219	228			PEAKS DB
39	A0A1S2XPC9|A0A1S2XPC9_CICAR	K.AVKPVLVAGPK.L	Y	34.38	1077.69	11	12	539.853	2	49.36	2782800	1	16554	Banda_8_839.raw	1	1	249	259			PEAKS DB
33	A0A1S2YRM0|A0A1S2YRM0_CICAR	K.SPLIVFEDVDLDK.A	N	76.51	1488.77	13	7	745.393	2	52.89	6459400	1	18355	Banda_8_839.raw	1	1	265	277			PEAKS DB
33	A0A1S2YRM0|A0A1S2YRM0_CICAR	K.IAFTGSSATGSK.I	Y	62.64	1125.57	12	-2	563.79	2	34	3167500	1	9445	Banda_8_839.raw	1	1	234	245			PEAKS DB
33	A0A1S2YRM0|A0A1S2YRM0_CICAR	R.ELGEWGLDNYLSVK.Q	N	58.09	1621.8	14	13	811.908	2	53.41	5029900	1	18664	Banda_8_839.raw	1	1	470	483			PEAKS DB
33	A0A1S2YRM0|A0A1S2YRM0_CICAR	K.ISDPLEEGC(+57.02)R.L	N	53.99	1174.53	10	16	588.273	2	40.31	6594300	1	11913	Banda_8_839.raw	1	1	323	332	Carbamidomethylation	C9:Carbamidomethylation:1000.00	PEAKS DB
33	A0A1S2YRM0|A0A1S2YRM0_CICAR	R.LGPVVSEGQYEK.I	Y	52.78	1304.66	12	5	653.338	2	38.99	5649700	1	11832	Banda_8_839.raw	2	2	333	344			PEAKS DB
33	A0A1S2YRM0|A0A1S2YRM0_CICAR	R.IPIINPSTQHIIGDIPAATK.E	Y	37.72	2098.18	20	3	700.4	3	52.44	442270	1	18307	Banda_8_839.raw	1	1	25	44			PEAKS DB
35	A0A1S2YZP7|A0A1S2YZP7_CICAR	R.ESVVDVEGVVSIPAAPIK.G	Y	73.19	1807.99	18	8	905.005	2	49.99	2233100	1	16864	Banda_8_839.raw	1	1	144	161			PEAKS DB
35	A0A1S2YZP7|A0A1S2YZP7_CICAR	R.AVPTLPINLEDAAR.S	Y	65.91	1478.81	14	-1	740.412	2	50.36	3694400	1	17588	Banda_8_839.raw	1	1	180	193			PEAKS DB
35	A0A1S2YZP7|A0A1S2YZP7_CICAR	K.LIAGSSEGGAAVFR.L	Y	63.67	1333.7	14	6	667.857	2	46.71	2723600	1	15215	Banda_8_839.raw	1	1	260	273			PEAKS DB
35	A0A1S2YZP7|A0A1S2YZP7_CICAR	K.EVGVEIEPFGDLNTEAER.K	Y	54.87	2002.95	18	9	1002.48	2	50.47	1627200	1	17492	Banda_8_839.raw	1	1	394	411			PEAKS DB
35	A0A1S2YZP7|A0A1S2YZP7_CICAR	K.TPVDVNEWTR.V	Y	39.79	1215.59	10	5	608.802	2	44.63	1609400	1	14101	Banda_8_839.raw	1	1	69	78			PEAKS DB
48	A0A3Q7XNE4|A0A3Q7XNE4_CICAR	R.AEATDVANAVLDGSDAILLGAETLR.G	Y	86.12	2484.27	25	14	829.099	3	57.96	4923800	1	21217	Banda_8_839.raw	2	2	275	299			PEAKS DB
48	A0A3Q7XNE4|A0A3Q7XNE4_CICAR	R.GLYPVETISTVGK.I	N	67.58	1362.74	13	-1	682.377	2	47.81	5971600	1	15974	Banda_8_839.raw	1	1	300	312			PEAKS DB
48	A0A3Q7XNE4|A0A3Q7XNE4_CICAR	R.GNLGIDLPPEK.V	N	60.13	1151.62	11	-3	576.816	2	45.3	12491000	1	14633	Banda_8_839.raw	1	1	228	238			PEAKS DB
48	A0A3Q7XNE4|A0A3Q7XNE4_CICAR	K.YRPTM(+15.99)PVLSVVIPR.L	Y	47.67	1642.92	14	-5	548.648	3	52.98	673290	1	18479	Banda_8_839.raw	1	1	376	389	Oxidation (M)	M5:Oxidation (M):1000.00	PEAKS DB
48	A0A3Q7XNE4|A0A3Q7XNE4_CICAR	S.Q(-17.03)TQIFAK.I	N	36.33	817.433	7	9	818.441	1	34.66	553790	1	9633	Banda_8_839.raw	1	1	197	203	Pyro-glu from Q	Q1:Pyro-glu from Q:1000.00	PEAKS DB
30	A0A1S2XHA3|A0A1S2XHA3_CICAR	R.DAVIQSDGK.N	Y	64.28	931.461	9	-4	466.738	2	18.08	1625200	1	2814	Banda_8_839.raw	2	2	105	113			PEAKS DB
30	A0A1S2XHA3|A0A1S2XHA3_CICAR	K.TITGLNPETTLVVVVSK.T	Y	61.42	1770.01	17	5	591.012	3	52.45	32850	1	18372	Banda_8_839.raw	1	1	197	213			PEAKS DB
30	A0A1S2XHA3|A0A1S2XHA3_CICAR	K.NVVLDVWNVLDK.I	Y	59.81	1412.77	12	18	707.392	2	56.5	27130	1	20224	Banda_8_839.raw	1	1	114	125			PEAKS DB
30	A0A1S2XHA3|A0A1S2XHA3_CICAR	K.LFQLAEVASLK.Q	Y	51.75	1217.7	11	7	609.859	2	53.12	2033800	1	18638	Banda_8_839.raw	1	1	65	75			PEAKS DB
30	A0A1S2XHA3|A0A1S2XHA3_CICAR	R.EWISSALGPSAVAK.H	Y	41.82	1414.75	14	-6	708.38	2	48.96	3005400	1	16557	Banda_8_839.raw	1	1	229	242			PEAKS DB
30	A0A1S2XHA3|A0A1S2XHA3_CICAR	K.TPEQLQK.E	Y	40.77	842.45	7	5	422.232	2	25.66	2545300	1	5934	Banda_8_839.raw	1	1	446	452			PEAKS DB
30	A0A1S2XHA3|A0A1S2XHA3_CICAR	R.SGSWVGATGK.E	Y	38.63	948.466	10	1	475.241	2	35.37	0	1	9989	Banda_8_839.raw	0	0	135	144			PEAKS DB
30	A0A1S2XHA3|A0A1S2XHA3_CICAR	R.AILPYTQALEK.F	Y	38.44	1245.7	11	1	623.856	2	49.4	4026400	1	16521	Banda_8_839.raw	1	1	339	349			PEAKS DB
30	A0A1S2XHA3|A0A1S2XHA3_CICAR	R.DLLSDDER.S	Y	34.3	961.435	8	-2	481.725	2	38.47	3122300	1	11500	Banda_8_839.raw	1	1	30	37			PEAKS DB
32	A0A1S2XXX7|A0A1S2XXX7_CICAR	K.Q(-17.03)TGSLYTDWDLLPPKK.I	Y	69.06	1843.94	16	24	922.977	2	52.43	2402700	1	18452	Banda_8_839.raw	1	1	197	212	Pyro-glu from Q	Q1:Pyro-glu from Q:1000.00	PEAKS DB
32	A0A1S2XXX7|A0A1S2XXX7_CICAR	R.FYAISAEFPEFSNK.D	Y	61.91	1648.78	14	1	825.396	2	52.56	5044900	1	18396	Banda_8_839.raw	1	1	79	92			PEAKS DB
32	A0A1S2XXX7|A0A1S2XXX7_CICAR	K.Q(-17.03)LAEETWGK.Q	Y	53.88	1043.49	9	-4	1044.5	1	38.02	424230	1	11125	Banda_8_839.raw	1	1	347	355	Pyro-glu from Q	Q1:Pyro-glu from Q:1000.00	PEAKS DB
32	A0A1S2XXX7|A0A1S2XXX7_CICAR	K.APLIDNPEFKDDPEIYVFPK.L	Y	52.24	2346.18	20	3	783.067	3	53.47	3852800	1	18711	Banda_8_839.raw	1	1	297	316			PEAKS DB
32	A0A1S2XXX7|A0A1S2XXX7_CICAR	K.EIPDSDAK.K	Y	44.93	873.408	8	7	437.712	2	17.78	4030300	1	2701	Banda_8_839.raw	3	3	247	254			PEAKS DB
32	A0A1S2XXX7|A0A1S2XXX7_CICAR	K.KPEDWDDEEDGEWTAPTIANPEYK.G	Y	42.77	2834.22	24	-19	945.745	3	50.47	1069400	1	17034	Banda_8_839.raw	1	1	255	278			PEAKS DB
32	A0A1S2XXX7|A0A1S2XXX7_CICAR	K.QLAEETWGK.Q	Y	37.6	1060.52	9	2	531.267	2	40.61	0	1	12378	Banda_8_839.raw	0	0	347	355			PEAKS DB
34	A0A1S2XYI7|A0A1S2XYI7_CICAR	R.EQAVWALGNVAGDSPR.C	N	67.01	1668.82	16	5	835.419	2	48.73	390700	1	16192	Banda_8_839.raw	1	1	178	193			PEAKS DB
34	A0A1S2XYI7|A0A1S2XYI7_CICAR	K.VVIEHGAVPIFVK.L	Y	59.52	1406.83	13	-2	469.95	3	52.51	186700	1	18364	Banda_8_839.raw	1	1	155	167			PEAKS DB
34	A0A1S2XYI7|A0A1S2XYI7_CICAR	K.VAVDAEEGR.R	N	58.55	944.456	9	2	473.236	2	18.03	1436600	1	2797	Banda_8_839.raw	2	2	20	28			PEAKS DB
34	A0A1S2XYI7|A0A1S2XYI7_CICAR	K.IQAVIEAGVC(+57.02)PR.L	Y	54.85	1311.7	12	18	656.857	2	43.25	768340	1	13729	Banda_8_839.raw	1	1	279	290	Carbamidomethylation	C10:Carbamidomethylation:1000.00	PEAKS DB
34	A0A1S2XYI7|A0A1S2XYI7_CICAR	R.TPPIEEVIQTGVVSR.F	Y	49.92	1623.88	15	22	812.951	2	49.96	5881400	1	17190	Banda_8_839.raw	2	2	107	121			PEAKS DB
34	A0A1S2XYI7|A0A1S2XYI7_CICAR	K.LLASPSDDVR.E	N	49.25	1071.56	10	-5	536.785	2	37.95	5094700	1	11324	Banda_8_839.raw	1	1	168	177			PEAKS DB
34	A0A1S2XYI7|A0A1S2XYI7_CICAR	R.IVTVC(+57.02)LEGLENILK.V	N	35.35	1599.89	14	7	800.953	2	55.19	1531200	1	19721	Banda_8_839.raw	1	1	430	443	Carbamidomethylation	C5:Carbamidomethylation:1000.00	PEAKS DB
37	A0A1S2Z036|A0A1S2Z036_CICAR	K.Q(-17.03)APGAGPSKPK.I	Y	69.96	1019.54	11	-1	510.777	2	17.78	1251700	1	2695	Banda_8_839.raw	2	2	530	540	Pyro-glu from Q	Q1:Pyro-glu from Q:1000.00	PEAKS DB
37	A0A1S2Z036|A0A1S2Z036_CICAR	K.VPGAQLEDSR.V	Y	64.93	1070.54	10	-3	536.275	2	32.54	4546200	1	9122	Banda_8_839.raw	1	1	203	212			PEAKS DB
37	A0A1S2Z036|A0A1S2Z036_CICAR	R.IILLDSPLEYK.K	Y	52.99	1302.74	11	15	652.38	2	53.17	2766400	1	18954	Banda_8_839.raw	1	1	238	248			PEAKS DB
37	A0A1S2Z036|A0A1S2Z036_CICAR	R.IDDIVSGIK.K	Y	47.22	958.533	9	-2	480.274	2	45.1	2482500	1	14491	Banda_8_839.raw	1	1	519	527			PEAKS DB
37	A0A1S2Z036|A0A1S2Z036_CICAR	K.LVPGGGATEMTVSATLK.Q	Y	42.8	1630.86	17	-8	816.437	2	46.69	691310	1	15030	Banda_8_839.raw	1	1	407	423			PEAKS DB
37	A0A1S2Z036|A0A1S2Z036_CICAR	R.TLAQNC(+57.02)GVNVIR.T	Y	41.85	1343.7	12	15	672.857	2	42.11	1150600	1	13074	Banda_8_839.raw	1	1	450	461	Carbamidomethylation	C6:Carbamidomethylation:1000.00	PEAKS DB
37	A0A1S2Z036|A0A1S2Z036_CICAR	K.ALEDAIAVIDK.I	Y	34.59	1156.63	11	4	579.324	2	49	3330900	1	16748	Banda_8_839.raw	1	1	127	137			PEAKS DB
42	A0A1S2XVG1|A0A1S2XVG1_CICAR	R.ATPAQVLANAFGLR.Q	Y	80.95	1427.79	14	12	714.902	2	56.52	6676100	1	20318	Banda_8_839.raw	2	2	494	507			PEAKS DB
42	A0A1S2XVG1|A0A1S2XVG1_CICAR	R.LSAEYVLLYR.N	Y	55.04	1225.67	10	0	613.843	2	52.37	3710400	1	18181	Banda_8_839.raw	1	1	399	408			PEAKS DB
42	A0A1S2XVG1|A0A1S2XVG1_CICAR	K.GVLGLSIPGC(+57.02)PTTFEEQR.Q	Y	48.91	1959.97	18	8	980.994	2	52.34	2426600	1	18157	Banda_8_839.raw	1	1	103	120	Carbamidomethylation	C10:Carbamidomethylation:1000.00	PEAKS DB
42	A0A1S2XVG1|A0A1S2XVG1_CICAR	R.ISTVNSLTLPILSYLR.L	Y	42.52	1789.03	16	16	895.526	2	57.55	1748700	1	20594	Banda_8_839.raw	1	1	383	398			PEAKS DB
42	A0A1S2XVG1|A0A1S2XVG1_CICAR	N.GLEETIC(+57.02)SAR.I	Y	37.91	1134.53	10	-19	568.273	2	43.17	0	1	13541	Banda_8_839.raw	0	0	353	362	Carbamidomethylation	C7:Carbamidomethylation:1000.00	PEAKS DB
42	A0A1S2XVG1|A0A1S2XVG1_CICAR	R.ADLYNPR.A	Y	34.15	847.419	7	4	424.717	2	34.17	13079000	1	9727	Banda_8_839.raw	1	1	373	379			PEAKS DB
51	A0A1S2XVF8|A0A1S2XVF8_CICAR	R.SPPIEEVIQAGVVPR.F	Y	75.7	1589.88	15	22	530.968	3	51.06	2229200	1	17572	Banda_8_839.raw	2	2	106	120			PEAKS DB
51	A0A1S2XVF8|A0A1S2XVF8_CICAR	R.EQAVWALGNVAGDSPR.C	N	67.01	1668.82	16	5	835.419	2	48.73	390700	1	16192	Banda_8_839.raw	1	1	177	192			PEAKS DB
51	A0A1S2XVF8|A0A1S2XVF8_CICAR	K.VAVDAEEGR.R	N	58.55	944.456	9	2	473.236	2	18.03	1436600	1	2797	Banda_8_839.raw	2	2	20	28			PEAKS DB
51	A0A1S2XVF8|A0A1S2XVF8_CICAR	Q.LLASPSDDVR.E	N	49.25	1071.56	10	-5	536.785	2	37.95	5094700	1	11324	Banda_8_839.raw	1	1	167	176			PEAKS DB
51	A0A1S2XVF8|A0A1S2XVF8_CICAR	R.IVTVC(+57.02)LEGLENILK.V	N	35.35	1599.89	14	7	800.953	2	55.19	1531200	1	19721	Banda_8_839.raw	1	1	429	442	Carbamidomethylation	C5:Carbamidomethylation:1000.00	PEAKS DB
31	A0A1S2XXR3|A0A1S2XXR3_CICAR	R.GNLGIDLPPEK.V	N	60.13	1151.62	11	-3	576.816	2	45.3	12491000	1	14633	Banda_8_839.raw	1	1	280	290			PEAKS DB
31	A0A1S2XXR3|A0A1S2XXR3_CICAR	K.NSATLSGSLYTLHVSQIR.I	Y	58.06	1946.02	18	9	649.682	3	52.28	889460	1	18217	Banda_8_839.raw	1	1	181	198			PEAKS DB
31	A0A1S2XXR3|A0A1S2XXR3_CICAR	R.EFISTFEGLK.Q	Y	54.16	1169.6	10	23	585.807	2	51.12	3830900	1	18025	Banda_8_839.raw	1	1	239	248			PEAKS DB
31	A0A1S2XXR3|A0A1S2XXR3_CICAR	K.KGDTIFIGK.Y	Y	50.42	977.555	9	5	489.785	2	50.36	1728700	1	17230	Banda_8_839.raw	1	1	144	152			PEAKS DB
31	A0A1S2XXR3|A0A1S2XXR3_CICAR	M(+15.99)(+42.01)QSSPLLLEEPIR.M	N	49.96	1569.81	13	-2	785.911	2	46.28	3069600	1	15242	Banda_8_839.raw	1	1	1	13	Oxidation (M); Acetylation (Protein N-term)	M1:Oxidation (M):1000.00;M1:Acetylation (Protein N-term):1000.00	PEAKS DB
31	A0A1S2XXR3|A0A1S2XXR3_CICAR	K.YRPTM(+15.99)PVISVVIPQLK.T	N	38.85	1856.06	16	13	619.694	3	53.41	1644400	1	18897	Banda_8_839.raw	1	1	428	443	Oxidation (M)	M5:Oxidation (M):1000.00	PEAKS DB
41	A0A1S2XQD1|A0A1S2XQD1_CICAR	R.GLYPVETISTVGK.I	N	67.58	1362.74	13	-1	682.377	2	47.81	5971600	1	15974	Banda_8_839.raw	1	1	353	365			PEAKS DB
41	A0A1S2XQD1|A0A1S2XQD1_CICAR	R.GNLGIDLPPEK.V	N	60.13	1151.62	11	-3	576.816	2	45.3	12491000	1	14633	Banda_8_839.raw	1	1	281	291			PEAKS DB
41	A0A1S2XQD1|A0A1S2XQD1_CICAR	M(+15.99)(+42.01)QSSPLLLEEPIR.M	N	49.96	1569.81	13	-2	785.911	2	46.28	3069600	1	15242	Banda_8_839.raw	1	1	1	13	Oxidation (M); Acetylation (Protein N-term)	M1:Oxidation (M):1000.00;M1:Acetylation (Protein N-term):1000.00	PEAKS DB
41	A0A1S2XQD1|A0A1S2XQD1_CICAR	R.AEATDVANAVLDGSDAIVLGAETLR.G	Y	47.94	2470.26	25	23	824.428	3	56.26	2423100	1	20026	Banda_8_839.raw	1	1	328	352			PEAKS DB
41	A0A1S2XQD1|A0A1S2XQD1_CICAR	K.YRPTM(+15.99)PVLSVVIPQLK.T	N	38.85	1856.06	16	13	619.694	3	53.41	1644400	1	18897	Banda_8_839.raw	1	1	429	444	Oxidation (M)	M5:Oxidation (M):1000.00	PEAKS DB
41	A0A1S2XQD1|A0A1S2XQD1_CICAR	K.Q(-17.03)TQIFAK.I	N	36.33	817.433	7	9	818.441	1	34.66	553790	1	9633	Banda_8_839.raw	1	1	250	256	Pyro-glu from Q	Q1:Pyro-glu from Q:1000.00	PEAKS DB
38	A0A1S2XDD9|A0A1S2XDD9_CICAR	R.VVAIIAEGVPESDTK.Q	Y	66.62	1526.82	15	2	764.417	2	46.12	265100	1	14756	Banda_8_839.raw	1	1	106	120			PEAKS DB
38	A0A1S2XDD9|A0A1S2XDD9_CICAR	K.VVIGPATVGGIQAGAFK.I	Y	64.92	1583.9	17	8	792.96	2	49.47	2362600	1	16656	Banda_8_839.raw	1	1	132	148			PEAKS DB
38	A0A1S2XDD9|A0A1S2XDD9_CICAR	R.ETPSVAGIINPGSEGFQK.L	Y	52.25	1829.92	18	15	915.967	2	47.12	1525100	1	15193	Banda_8_839.raw	1	1	36	53			PEAKS DB
38	A0A1S2XDD9|A0A1S2XDD9_CICAR	R.EAGAVVPTSYEAFETSIK.E	Y	47.11	1897.93	18	21	949.975	2	48.71	1295700	1	16085	Banda_8_839.raw	1	1	294	311			PEAKS DB
38	A0A1S2XDD9|A0A1S2XDD9_CICAR	R.FGGAIDDAAR.Y	Y	44.2	991.472	10	5	496.744	2	40.71	0	1	12422	Banda_8_839.raw	0	0	448	457			PEAKS DB
38	A0A1S2XDD9|A0A1S2XDD9_CICAR	R.DEYSLVEALK.Q	Y	33.77	1165.59	10	18	583.802	2	49.46	211160	1	16875	Banda_8_839.raw	1	1	236	245			PEAKS DB
49	A0A1S2XVM2|A0A1S2XVM2_CICAR	K.EGSSIINTTSVNAYK.G	Y	72.63	1582.78	15	15	792.4	2	40.71	4875200	1	12353	Banda_8_839.raw	1	1	206	220			PEAKS DB
49	A0A1S2XVM2|A0A1S2XVM2_CICAR	K.IAVVTGGDSGIGR.S	Y	69.89	1200.65	13	3	601.331	2	39.44	7549200	1	11726	Banda_8_839.raw	1	1	75	87			PEAKS DB
49	A0A1S2XVM2|A0A1S2XVM2_CICAR	R.VVDEIINTYGR.I	Y	66.03	1277.66	11	2	639.838	2	46.2	6504800	1	14807	Banda_8_839.raw	1	1	147	157			PEAKS DB
49	A0A1S2XVM2|A0A1S2XVM2_CICAR	R.VNGVAPGPIWTPLIPSSFKEDK.T	Y	44.6	2351.25	22	6	784.759	3	54.41	836220	1	19280	Banda_8_839.raw	1	1	253	274			PEAKS DB
43	A0A1S2XVJ8|A0A1S2XVJ8_CICAR	R.NIENYGLAVLEVK.G	Y	59.29	1460.79	13	17	731.402	2	52.78	6930500	1	18341	Banda_8_839.raw	1	1	120	132			PEAKS DB
43	A0A1S2XVJ8|A0A1S2XVJ8_CICAR	R.NPESVLTAFSSK.V	Y	55.97	1278.65	12	-6	640.33	2	49.94	15488000	1	16714	Banda_8_839.raw	1	1	223	234			PEAKS DB
43	A0A1S2XVJ8|A0A1S2XVJ8_CICAR	R.NIVSALDKR.A	Y	44.36	1014.58	9	14	508.299	2	51.15	976950	1	17603	Banda_8_839.raw	1	1	424	432			PEAKS DB
43	A0A1S2XVJ8|A0A1S2XVJ8_CICAR	R.IDTEDGR.V	Y	41.53	804.361	7	-6	403.188	2	23.81	2035200	1	4919	Banda_8_839.raw	1	1	98	104			PEAKS DB
43	A0A1S2XVJ8|A0A1S2XVJ8_CICAR	R.VPAGTPMYLVNR.D	Y	40.04	1316.69	12	11	659.354	2	47.16	468630	1	15309	Banda_8_839.raw	1	1	178	189			PEAKS DB
43	A0A1S2XVJ8|A0A1S2XVJ8_CICAR	K.EVAYEYPAEK.V	Y	39.19	1197.56	10	51	599.788	2	35.47	5638400	1	10017	Banda_8_839.raw	1	1	435	444			PEAKS DB
44	A0A1S2XV08|A0A1S2XV08_CICAR	R.ISGENLM(+15.99)VEAK.S	Y	62.75	1205.6	11	5	603.806	2	33.57	4396800	1	9056	Banda_8_839.raw	1	1	367	377	Oxidation (M)	M7:Oxidation (M):1000.00	PEAKS DB
44	A0A1S2XV08|A0A1S2XV08_CICAR	R.QLEENLLLFDLVESK.L	Y	54.38	1788.95	15	13	895.484	2	61.97	879930	1	22664	Banda_8_839.raw	2	2	402	416			PEAKS DB
44	A0A1S2XV08|A0A1S2XV08_CICAR	K.NNPNILNNLIYTPLTITPEGEYR.M	Y	46.19	2658.37	23	13	1330.19	2	55.03	3578300	1	19524	Banda_8_839.raw	2	2	246	268			PEAKS DB
44	A0A1S2XV08|A0A1S2XV08_CICAR	K.ATISIGSR.Q	Y	46.12	803.45	8	1	402.732	2	36.31	6468400	1	10476	Banda_8_839.raw	1	1	394	401			PEAKS DB
44	A0A1S2XV08|A0A1S2XV08_CICAR	K.AVNVEFVLDR.S	Y	38.88	1160.62	10	3	581.317	2	50.41	2086600	1	17520	Banda_8_839.raw	1	1	351	360			PEAKS DB
44	A0A1S2XV08|A0A1S2XV08_CICAR	K.EAQVNAVGPFGLC(+57.02)FDSK.R	Y	38.83	1837.87	17	19	919.942	2	51.24	1168500	1	17477	Banda_8_839.raw	1	1	330	346	Carbamidomethylation	C13:Carbamidomethylation:1000.00	PEAKS DB
44	A0A1S2XV08|A0A1S2XV08_CICAR	R.Q(-17.03)LEENLLLFDLVESK.L	Y	35.35	1771.92	15	13	886.971	2	61.95	2141300	1	22630	Banda_8_839.raw	1	1	402	416	Pyro-glu from Q	Q1:Pyro-glu from Q:1000.00	PEAKS DB
45	A0A3Q7XWI9|A0A3Q7XWI9_CICAR	R.IEEELGAEAVYAGTNFR.T	Y	60.33	1867.9	17	5	934.955	2	48.6	105800	1	16100	Banda_8_839.raw	1	1	422	438			PEAKS DB
45	A0A3Q7XWI9|A0A3Q7XWI9_CICAR	R.SGETEDTFIADLAVGLATGQIK.T	Y	59.98	2235.13	22	3	1118.57	2	58.73	1799500	1	21515	Banda_8_839.raw	2	2	382	403			PEAKS DB
45	A0A3Q7XWI9|A0A3Q7XWI9_CICAR	K.EGLELLNTAIAK.A	Y	48.65	1270.71	12	3	636.364	2	50.87	2363900	1	17424	Banda_8_839.raw	1	1	227	238			PEAKS DB
45	A0A3Q7XWI9|A0A3Q7XWI9_CICAR	K.AVDNVNSIIAPALIGK.D	Y	39.72	1593.91	16	19	797.963	2	50.81	2680400	1	17292	Banda_8_839.raw	1	1	66	81			PEAKS DB
45	A0A3Q7XWI9|A0A3Q7XWI9_CICAR	K.LGANAILAVSLAVC(+57.02)K.A	Y	36.15	1498.85	15	15	750.436	2	54.02	139120	1	19131	Banda_8_839.raw	1	1	111	125	Carbamidomethylation	C14:Carbamidomethylation:1000.00	PEAKS DB
59	A0A1S2XBX5|A0A1S2XBX5_CICAR	R.VAAANSRPPNPQ	Y	63.81	1220.63	12	12	611.321	2	24.86	2542100	1	5258	Banda_8_839.raw	1	1	573	584			PEAKS DB
59	A0A1S2XBX5|A0A1S2XBX5_CICAR	R.TEEELIEAIATASGAEK.D	Y	61.45	1760.87	17	62	881.447	2	52.85	0	1	18558	Banda_8_839.raw	0	0	531	547			PEAKS DB
59	A0A1S2XBX5|A0A1S2XBX5_CICAR	K.VSNQEGLEAAVEEAAAFLNK.A	Y	51.58	2089.03	20	-6	697.351	3	56.91	808240	1	20316	Banda_8_839.raw	1	1	210	229			PEAKS DB
59	A0A1S2XBX5|A0A1S2XBX5_CICAR	K.ELLEWGSR.V	N	42.98	988.498	8	-7	495.256	2	49.78	2199100	1	16851	Banda_8_839.raw	1	1	565	572			PEAKS DB
55	A0A1S2XKN6|A0A1S2XKN6_CICAR	R.IVPGAAATEIELAK.R	Y	63.2	1381.78	14	5	691.898	2	47.16	1795200	1	15268	Banda_8_839.raw	1	1	410	423			PEAKS DB
55	A0A1S2XKN6|A0A1S2XKN6_CICAR	K.NEVDGNSVSTVVLR.G	Y	55.07	1487.76	14	38	744.889	2	43.17	727430	1	13443	Banda_8_839.raw	1	1	367	380			PEAKS DB
55	A0A1S2XKN6|A0A1S2XKN6_CICAR	K.GTVLIHSAEQLENYSK.T	Y	54.47	1787.91	16	30	596.977	3	51.36	562110	1	17756	Banda_8_839.raw	1	1	257	272			PEAKS DB
55	A0A1S2XKN6|A0A1S2XKN6_CICAR	K.VAVFAGGVDTSATETK.G	Y	52.63	1551.78	16	2	776.896	2	41.81	1393200	1	13066	Banda_8_839.raw	1	1	241	256			PEAKS DB
47	A0A1S2Z962|A0A1S2Z962_CICAR	K.SFGFDTAVEEAQR.A	Y	56.96	1455.66	13	1	728.839	2	48.34	3330600	1	16354	Banda_8_839.raw	1	1	230	242			PEAKS DB
47	A0A1S2Z962|A0A1S2Z962_CICAR	R.GINQVYIIGGDGTQR.G	Y	55.42	1589.82	15	-6	795.915	2	46.49	2870500	1	15163	Banda_8_839.raw	1	1	181	195			PEAKS DB
47	A0A1S2Z962|A0A1S2Z962_CICAR	K.VLGIDGGYR.G	Y	48.92	948.503	9	-3	475.259	2	47.1	2523100	1	15560	Banda_8_839.raw	1	1	127	135			PEAKS DB
47	A0A1S2Z962|A0A1S2Z962_CICAR	R.GAAVIYEEVR.R	Y	37.03	1105.58	10	28	553.797	2	44.94	2797800	1	14053	Banda_8_839.raw	1	1	196	205			PEAKS DB
47	A0A1S2Z962|A0A1S2Z962_CICAR	K.M(+15.99)NQVVVTDR.M	Y	35.58	1076.53	9	13	539.272	2	28.21	1654400	1	6843	Banda_8_839.raw	1	1	431	439	Oxidation (M)	M1:Oxidation (M):1000.00	PEAKS DB
58	A0A1S2XQK0|A0A1S2XQK0_CICAR	K.VQDDEVGDGTTSVVVLAGELLR.E	N	70.54	2271.16	22	16	758.062	3	56.45	1252900	1	20182	Banda_8_839.raw	1	1	85	106			PEAKS DB
58	A0A1S2XQK0|A0A1S2XQK0_CICAR	R.ALLAIPTTIADNAGLDSAELISQLR.A	Y	41.93	2565.4	25	13	856.142	3	57.89	625790	1	20809	Banda_8_839.raw	1	1	437	461			PEAKS DB
58	A0A1S2XQK0|A0A1S2XQK0_CICAR	R.LALVTGGEIASTFDNPESVK.L	N	41.2	2047.05	20	3	1024.53	2	51.64	1657700	1	18168	Banda_8_839.raw	1	1	318	337			PEAKS DB
58	A0A1S2XQK0|A0A1S2XQK0_CICAR	R.VDEIITC(+57.02)APR.R	N	40.69	1172.59	10	7	587.301	2	39.84	1434900	1	11254	Banda_8_839.raw	1	1	512	521	Carbamidomethylation	C7:Carbamidomethylation:1000.00	PEAKS DB
60	A0A1S2Z2F2|A0A1S2Z2F2_CICAR	K.VQDDEVGDGTTSVVVLAGELLR.E	N	70.54	2271.16	22	16	758.062	3	56.45	1252900	1	20182	Banda_8_839.raw	1	1	85	106			PEAKS DB
60	A0A1S2Z2F2|A0A1S2Z2F2_CICAR	R.LALVTGGEIASTFDNPESVK.L	N	41.2	2047.05	20	3	1024.53	2	51.64	1657700	1	18168	Banda_8_839.raw	1	1	318	337			PEAKS DB
60	A0A1S2Z2F2|A0A1S2Z2F2_CICAR	R.VDEIITC(+57.02)APR.R	N	40.69	1172.59	10	7	587.301	2	39.84	1434900	1	11254	Banda_8_839.raw	1	1	512	521	Carbamidomethylation	C7:Carbamidomethylation:1000.00	PEAKS DB
60	A0A1S2Z2F2|A0A1S2Z2F2_CICAR	K.NAVLLSATEAAEMILR.V	Y	37.9	1700.91	16	11	567.979	3	58.08	286670	1	21058	Banda_8_839.raw	2	2	496	511			PEAKS DB
52	A0A1S2YCZ4|A0A1S2YCZ4_CICAR	R.SQDYEIGDGTTGVVVLAGSLLEQAER.L	Y	57.71	2706.33	26	9	903.12	3	57.13	1258100	1	20645	Banda_8_839.raw	1	1	93	118			PEAKS DB
52	A0A1S2YCZ4|A0A1S2YCZ4_CICAR	K.AVLAVADLER.K	Y	50.21	1055.6	10	-8	528.806	2	48.55	3216700	1	16326	Banda_8_839.raw	1	1	188	197			PEAKS DB
52	A0A1S2YCZ4|A0A1S2YCZ4_CICAR	R.IAEGYEM(+15.99)ASR.I	Y	40.47	1141.51	10	-9	571.76	2	27.95	1643400	1	6634	Banda_8_839.raw	1	1	129	138	Oxidation (M)	M7:Oxidation (M):1000.00	PEAKS DB
52	A0A1S2YCZ4|A0A1S2YCZ4_CICAR	K.IAILTC(+57.02)PFEPPKPK.T	Y	38.06	1609.89	14	15	537.638	3	52.43	628150	1	18267	Banda_8_839.raw	1	1	244	257	Carbamidomethylation	C6:Carbamidomethylation:1000.00	PEAKS DB
52	A0A1S2YCZ4|A0A1S2YCZ4_CICAR	K.QQQILLATQVVK.M	Y	36.59	1367.81	12	-6	684.914	2	46.94	753120	1	15437	Banda_8_839.raw	1	1	510	521			PEAKS DB
56	A0A1S2Z0X6|A0A1S2Z0X6_CICAR	K.TSEAIGYGAVK.Y	Y	61.01	1094.56	11	-17	548.287	2	34.89	1659800	1	9898	Banda_8_839.raw	1	1	439	449			PEAKS DB
56	A0A1S2Z0X6|A0A1S2Z0X6_CICAR	K.YPDTDEVNESSIGDLQAFYK.A	Y	53.45	2290.03	20	10	1146.02	2	49.94	339320	1	16866	Banda_8_839.raw	1	1	197	216			PEAKS DB
56	A0A1S2Z0X6|A0A1S2Z0X6_CICAR	R.VIFVEGVDIPLIAVK.R	Y	49	1610.96	15	9	806.49	2	55.75	932450	1	19819	Banda_8_839.raw	1	1	305	319			PEAKS DB
84	A0A1S2YK61|A0A1S2YK61_CICAR	R.YEVDGYIYNSAEEPK.I	Y	61.62	1775.79	15	23	888.904	2	43.94	1573400	1	13993	Banda_8_839.raw	1	1	272	286			PEAKS DB
84	A0A1S2YK61|A0A1S2YK61_CICAR	R.HGVVLDLVPPPTK.V	Y	57.36	1370.79	13	4	457.938	3	52.31	10300	1	18167	Banda_8_839.raw	2	2	217	229			PEAKS DB
84	A0A1S2YK61|A0A1S2YK61_CICAR	K.FLGNSVDVYPVGR.T	Y	53.77	1421.73	13	8	711.873	2	49.38	1590800	1	16580	Banda_8_839.raw	1	1	197	209			PEAKS DB
63	A0A3Q7K771|A0A3Q7K771_CICAR	K.YVLLDYAPGTTNDK.V	Y	50.68	1568.77	14	13	785.394	2	48.6	4426300	1	16741	Banda_8_839.raw	1	1	27	40			PEAKS DB
63	A0A3Q7K771|A0A3Q7K771_CICAR	R.NNEAYLFINDK.Y	Y	48.67	1339.64	11	-4	670.827	2	47.77	1994800	1	15738	Banda_8_839.raw	1	1	16	26			PEAKS DB
63	A0A3Q7K771|A0A3Q7K771_CICAR	K.VLYGPSFVR.D	Y	40.49	1036.57	9	-8	519.292	2	49.78	6278700	1	16578	Banda_8_839.raw	1	1	41	49			PEAKS DB
63	A0A3Q7K771|A0A3Q7K771_CICAR	K.TNEAYLFK.G	Y	36.79	984.492	8	7	493.253	2	46.79	635200	1	15426	Banda_8_839.raw	1	1	183	190			PEAKS DB
57	A0A1S2Y169|A0A1S2Y169_CICAR	R.EAPSVSQIDGEWR.Y	Y	46.29	1472.69	13	13	737.353	2	45.96	1976600	1	14622	Banda_8_839.raw	1	1	436	448			PEAKS DB
57	A0A1S2Y169|A0A1S2Y169_CICAR	K.AEGEVILEDVQPK.L	Y	42.51	1425.74	13	14	713.876	2	46.25	1074900	1	15057	Banda_8_839.raw	1	1	261	273			PEAKS DB
57	A0A1S2Y169|A0A1S2Y169_CICAR	K.Q(-17.03)HTYVETENVR.Y	Y	42.25	1357.63	11	-1	679.82	2	30.97	520050	1	8565	Banda_8_839.raw	1	1	45	55	Pyro-glu from Q	Q1:Pyro-glu from Q:1000.00	PEAKS DB
57	A0A1S2Y169|A0A1S2Y169_CICAR	M.VVLAASIVGK.S	Y	35.58	955.607	10	21	478.812	2	47.56	1653700	1	15438	Banda_8_839.raw	1	1	2	11			PEAKS DB
57	A0A1S2Y169|A0A1S2Y169_CICAR	R.IEGLLAAFPK.L	Y	34.09	1057.62	10	8	529.816	2	53.17	1403100	1	18591	Banda_8_839.raw	1	1	29	38			PEAKS DB
64	A0A1S2XCF6|A0A1S2XCF6_CICAR	K.VSDEVPFIADLKPSGK.Y	Y	54.19	1700.9	16	0	567.973	3	52.45	1512800	1	18393	Banda_8_839.raw	1	1	340	355			PEAKS DB
64	A0A1S2XCF6|A0A1S2XCF6_CICAR	K.SQGASQAVLYGVGLSDDDLK.K	Y	37.99	2021.99	20	17	1012	2	48.03	251930	1	15819	Banda_8_839.raw	1	1	58	77			PEAKS DB
64	A0A1S2XCF6|A0A1S2XCF6_CICAR	K.SVGIDLTLDDFQK.V	Y	37.84	1449.74	13	-3	725.875	2	51.17	1088200	1	17560	Banda_8_839.raw	1	1	327	339			PEAKS DB
64	A0A1S2XCF6|A0A1S2XCF6_CICAR	K.TLAENAELFPPLTK.G	Y	34	1542.83	14	14	772.423	2	50.87	1375600	1	17301	Banda_8_839.raw	1	1	391	404			PEAKS DB
79	A0A1S2YNV5|A0A1S2YNV5_CICAR	K.IIDGPLSSAAGNPDEIAK.L	Y	64.04	1766.9	18	1	884.46	2	46.18	297300	1	14944	Banda_8_839.raw	1	1	52	69			PEAKS DB
79	A0A1S2YNV5|A0A1S2YNV5_CICAR	K.EVPTSFGFDTAC(+57.02)K.I	Y	34.86	1457.65	13	10	729.833	2	46.9	878170	1	15228	Banda_8_839.raw	1	1	236	248	Carbamidomethylation	C12:Carbamidomethylation:1000.00	PEAKS DB
68	A0A1S2XHQ9|A0A1S2XHQ9_CICAR	K.IGGIGTVPVGR.V	Y	51.18	1024.6	11	-6	513.308	2	44.54	469500	1	14023	Banda_8_839.raw	1	1	244	254			PEAKS DB
68	A0A1S2XHQ9|A0A1S2XHQ9_CICAR	R.VETGVIKPGVIVTFGPTGLTTEVK.S	Y	45.85	2441.38	24	10	814.801	3	53.36	3105600	1	18643	Banda_8_839.raw	1	1	255	278			PEAKS DB
68	A0A1S2XHQ9|A0A1S2XHQ9_CICAR	R.LPLQDVYK.I	Y	34	974.544	8	1	488.279	2	46.88	4379200	1	15078	Banda_8_839.raw	1	1	236	243			PEAKS DB
70	A0A3Q7YDM1|A0A3Q7YDM1_CICAR	R.LPDFPAFALEC(+57.02)LPNR.N	Y	46.69	1758.88	15	14	880.447	2	55.12	248170	1	19513	Banda_8_839.raw	1	1	234	248	Carbamidomethylation	C11:Carbamidomethylation:1000.00	PEAKS DB
70	A0A3Q7YDM1|A0A3Q7YDM1_CICAR	K.AAVLILGAGR.V	Y	39.21	939.587	10	-1	470.8	2	48.92	1469800	1	16327	Banda_8_839.raw	1	1	11	20			PEAKS DB
70	A0A3Q7YDM1|A0A3Q7YDM1_CICAR	R.NSLLYGDLYGIGTEASTVFR.G	Y	38.77	2175.08	20	5	726.036	3	55.43	211320	1	19750	Banda_8_839.raw	1	1	249	268			PEAKS DB
109	A0A1S2YP37|A0A1S2YP37_CICAR	K.NAVVTVPAYFNDSQR.Q	Y	55.92	1679.83	15	32	840.923	2	47.14	360020	1	15445	Banda_8_839.raw	1	1	144	158			PEAKS DB
109	A0A1S2YP37|A0A1S2YP37_CICAR	R.IINEPTAAAIAYGLDKK.A	Y	44.22	1786.98	17	0	596.668	3	51.92	859310	1	17898	Banda_8_839.raw	1	1	175	191			PEAKS DB
125	A0A1S2YJT8|A0A1S2YJT8_CICAR	K.NAVVTVPAYFNDSQR.Q	Y	55.92	1679.83	15	32	840.923	2	47.14	360020	1	15445	Banda_8_839.raw	1	1	145	159			PEAKS DB
125	A0A1S2YJT8|A0A1S2YJT8_CICAR	R.IINEPTAAAIAYGLDKK.A	Y	44.22	1786.98	17	0	596.668	3	51.92	859310	1	17898	Banda_8_839.raw	1	1	176	192			PEAKS DB
129	A0A3Q7XNM5|A0A3Q7XNM5_CICAR	K.NAVVTVPAYFNDSQR.Q	Y	55.92	1679.83	15	32	840.923	2	47.14	360020	1	15445	Banda_8_839.raw	1	1	40	54			PEAKS DB
129	A0A3Q7XNM5|A0A3Q7XNM5_CICAR	R.IINEPTAAAIAYGLDKK.A	Y	44.22	1786.98	17	0	596.668	3	51.92	859310	1	17898	Banda_8_839.raw	1	1	71	87			PEAKS DB
131	A0A1S2XTT7|A0A1S2XTT7_CICAR	K.NAVVTVPAYFNDSQR.Q	Y	55.92	1679.83	15	32	840.923	2	47.14	360020	1	15445	Banda_8_839.raw	1	1	145	159			PEAKS DB
131	A0A1S2XTT7|A0A1S2XTT7_CICAR	R.IINEPTAAAIAYGLDKK.A	Y	44.22	1786.98	17	0	596.668	3	51.92	859310	1	17898	Banda_8_839.raw	1	1	176	192			PEAKS DB
130	A0A1S2XNN9|A0A1S2XNN9_CICAR	K.NAVVTVPAYFNDSQR.Q	Y	55.92	1679.83	15	32	840.923	2	47.14	360020	1	15445	Banda_8_839.raw	1	1	145	159			PEAKS DB
130	A0A1S2XNN9|A0A1S2XNN9_CICAR	R.IINEPTAAAIAYGLDKK.A	Y	44.22	1786.98	17	0	596.668	3	51.92	859310	1	17898	Banda_8_839.raw	1	1	176	192			PEAKS DB
132	A0A3Q7Y9C5|A0A3Q7Y9C5_CICAR	K.NAVVTVPAYFNDSQR.Q	Y	55.92	1679.83	15	32	840.923	2	47.14	360020	1	15445	Banda_8_839.raw	1	1	145	159			PEAKS DB
132	A0A3Q7Y9C5|A0A3Q7Y9C5_CICAR	R.IINEPTAAAIAYGLDKK.A	Y	44.22	1786.98	17	0	596.668	3	51.92	859310	1	17898	Banda_8_839.raw	1	1	176	192			PEAKS DB
133	A0A3Q7XX63|A0A3Q7XX63_CICAR	K.NAVVTVPAYFNDSQR.Q	Y	55.92	1679.83	15	32	840.923	2	47.14	360020	1	15445	Banda_8_839.raw	1	1	145	159			PEAKS DB
133	A0A3Q7XX63|A0A3Q7XX63_CICAR	R.IINEPTAAAIAYGLDKK.A	Y	44.22	1786.98	17	0	596.668	3	51.92	859310	1	17898	Banda_8_839.raw	1	1	176	192			PEAKS DB
134	A0A3Q7YDX0|A0A3Q7YDX0_CICAR	K.NAVVTVPAYFNDSQR.Q	Y	55.92	1679.83	15	32	840.923	2	47.14	360020	1	15445	Banda_8_839.raw	1	1	145	159			PEAKS DB
134	A0A3Q7YDX0|A0A3Q7YDX0_CICAR	R.IINEPTAAAIAYGLDKK.A	Y	44.22	1786.98	17	0	596.668	3	51.92	859310	1	17898	Banda_8_839.raw	1	1	176	192			PEAKS DB
135	A0A3Q7X4Q2|A0A3Q7X4Q2_CICAR	K.NAVVTVPAYFNDSQR.Q	Y	55.92	1679.83	15	32	840.923	2	47.14	360020	1	15445	Banda_8_839.raw	1	1	145	159			PEAKS DB
135	A0A3Q7X4Q2|A0A3Q7X4Q2_CICAR	R.IINEPTAAAIAYGLDKK.A	Y	44.22	1786.98	17	0	596.668	3	51.92	859310	1	17898	Banda_8_839.raw	1	1	176	192			PEAKS DB
104	A0A1S2XSP2|A0A1S2XSP2_CICAR	R.YETSAVNPQQR.Y	Y	41.93	1291.62	11	-4	646.815	2	27.12	1316200	1	6364	Banda_8_839.raw	1	1	28	38			PEAKS DB
104	A0A1S2XSP2|A0A1S2XSP2_CICAR	R.Q(-17.03)TQGTVPEQLEYAK.R	Y	39.5	1573.76	14	18	787.89	2	34.86	39880	1	9704	Banda_8_839.raw	1	1	136	149	Pyro-glu from Q	Q1:Pyro-glu from Q:1000.00	PEAKS DB
104	A0A1S2XSP2|A0A1S2XSP2_CICAR	R.YDTAVNPQQR.Y	Y	36.38	1190.57	10	18	596.292	2	27.32	866370	1	6286	Banda_8_839.raw	1	1	18	27			PEAKS DB
83	A0A1S2YE16|A0A1S2YE16_CICAR	R.VNFSAVADLKDPLITK.A	Y	40.39	1729.96	16	2	577.661	3	53.03	108700	1	18546	Banda_8_839.raw	1	1	165	180			PEAKS DB
83	A0A1S2YE16|A0A1S2YE16_CICAR	R.M(+15.99)DITAEDLGVITEDVVQLR.K	Y	39.74	2132.07	19	17	711.697	3	54.91	349770	1	19473	Banda_8_839.raw	1	1	406	424	Oxidation (M)	M1:Oxidation (M):1000.00	PEAKS DB
83	A0A1S2YE16|A0A1S2YE16_CICAR	R.AQDLYDEFR.I	Y	34.71	1155.52	9	4	578.767	2	46.99	1352300	1	15219	Banda_8_839.raw	1	1	354	362			PEAKS DB
71	A0A3Q7XU71|A0A3Q7XU71_CICAR	K.STTGGQILFLSGQVDDR.T	Y	53.59	1792.9	17	3	897.455	2	49.58	1899100	1	16691	Banda_8_839.raw	1	1	88	104			PEAKS DB
71	A0A3Q7XU71|A0A3Q7XU71_CICAR	R.YDEIESK.M	N	35.15	882.397	7	-7	442.205	2	26.76	2029500	1	6460	Banda_8_839.raw	1	1	234	240			PEAKS DB
226	A0A1S2XW02|A0A1S2XW02_CICAR	R.NDAGLAAAELALAVEK.H	Y	52.09	1554.83	16	31	778.422	2	52.83	483180	1	18566	Banda_8_839.raw	1	1	290	305			PEAKS DB
226	A0A1S2XW02|A0A1S2XW02_CICAR	R.LLAGGETLANTLK.T	Y	35.4	1299.74	13	-4	650.877	2	48.76	855870	1	16257	Banda_8_839.raw	1	1	189	201			PEAKS DB
94	A0A1S2YGW8|A0A1S2YGW8_CICAR	R.EVGDGTTSVVIVAAELLK.R	Y	38.74	1799.99	18	1	901.001	2	56.88	212480	1	20408	Banda_8_839.raw	1	1	88	105			PEAKS DB
94	A0A1S2YGW8|A0A1S2YGW8_CICAR	K.TSSAVSLILR.G	Y	36.87	1045.61	10	-4	523.814	2	50.65	47450	1	17254	Banda_8_839.raw	1	1	372	381			PEAKS DB
82	A0A1S2XSJ5|A0A1S2XSJ5_CICAR	K.AVANSTSATFLR.V	Y	43.08	1236.65	12	1	619.33	2	45.19	1373200	1	14702	Banda_8_839.raw	1	1	244	255			PEAKS DB
82	A0A1S2XSJ5|A0A1S2XSJ5_CICAR	K.IEFPLPDIK.T	Y	37.67	1070.6	9	0	536.308	2	52.59	576130	1	18287	Banda_8_839.raw	1	1	357	365			PEAKS DB
77	A0A1S3EIC8|A0A1S3EIC8_CICAR	K.STTGGQILFLSGQVDER.T	Y	42.53	1806.91	17	3	904.463	2	49.67	1508100	1	16864	Banda_8_839.raw	1	1	96	112			PEAKS DB
77	A0A1S3EIC8|A0A1S3EIC8_CICAR	R.YDEIESK.M	N	35.15	882.397	7	-7	442.205	2	26.76	2029500	1	6460	Banda_8_839.raw	1	1	242	248			PEAKS DB
162	A0A1S2XNH7|A0A1S2XNH7_CICAR	K.ADDSSIAGEVTIEANTVYGALR.G	Y	39.83	2251.1	22	3	1126.56	2	53.02	378760	1	18528	Banda_8_839.raw	1	1	150	171			PEAKS DB
162	A0A1S2XNH7|A0A1S2XNH7_CICAR	K.DITLTALPR.L	Y	38.1	998.576	9	-9	500.295	2	48.16	1882400	1	15812	Banda_8_839.raw	1	1	516	524			PEAKS DB

## Sheet: 8
Protein Group	Protein ID	Protein Accession	Peptide	Unique	Score	Mass	Length	ppm	m/z	z	RT	Area Sample	Fraction	Scan	Source File	#Feature	#Feature Sample 1	Start	End	PTM	AScore	Found By
2	2	A0A3Q7XNW1|A0A3Q7XNW1_CICAR	R.LHQNIGSSSSPDIYNPQAGR.I	N	111.97	2140.03	20	3	1071.02	2	49.84	205790000	1	17262	Banda_10_827.raw	2	2	325	344			PEAKS DB
2	2	A0A3Q7XNW1|A0A3Q7XNW1_CICAR	K.GNSVFDGELEAGR.A	N	84.37	1349.62	13	16	675.819	2	46.88	220040000	1	15946	Banda_10_827.raw	2	2	402	414			PEAKS DB
2	2	A0A3Q7XNW1|A0A3Q7XNW1_CICAR	K.SEGGLIETWNPSNK.Q	N	82.44	1530.73	14	12	766.374	2	49.46	13910000	1	16812	Banda_10_827.raw	1	1	47	60			PEAKS DB
2	2	A0A3Q7XNW1|A0A3Q7XNW1_CICAR	K.FNSPFSFLVPPR.S	Y	82	1406.73	12	6	704.375	2	56.57	4038000	1	21061	Banda_10_827.raw	2	2	480	491			PEAKS DB
2	2	A0A3Q7XNW1|A0A3Q7XNW1_CICAR	K.NAM(+15.99)FVPHYNLNANSILYALK.G	N	81.54	2308.17	20	24	770.398	3	55.13	2275700	1	20189	Banda_10_827.raw	1	1	371	390	Oxidation (M)	M3:Oxidation (M):1000.00	PEAKS DB
2	2	A0A3Q7XNW1|A0A3Q7XNW1_CICAR	R.DNGFEETIC(+57.02)TAR.L	N	78.41	1411.6	12	21	706.811	2	40.92	1436000	1	12746	Banda_10_827.raw	1	1	313	324	Carbamidomethylation	C9:Carbamidomethylation:1000.00	PEAKS DB
2	2	A0A3Q7XNW1|A0A3Q7XNW1_CICAR	R.DFLEDALNVNR.R	N	76.82	1304.64	11	6	653.326	2	53.51	57896000	1	19632	Banda_10_827.raw	3	3	219	229			PEAKS DB
2	2	A0A3Q7XNW1|A0A3Q7XNW1_CICAR	K.LSAEFGSLHK.N	N	71.62	1087.57	10	-4	544.79	2	51.51	53158000	1	18414	Banda_10_827.raw	1	1	361	370			PEAKS DB
2	2	A0A3Q7XNW1|A0A3Q7XNW1_CICAR	K.TVTSFDLPALR.F	N	70.25	1218.66	11	4	610.338	2	57.19	274580000	1	21221	Banda_10_827.raw	1	1	347	357			PEAKS DB
2	2	A0A3Q7XNW1|A0A3Q7XNW1_CICAR	R.LLGASSLINGMPEEVVAAAFNMER.N	Y	68.44	2518.26	24	6	840.426	3	60.17	337530	1	22633	Banda_10_827.raw	1	1	449	472			PEAKS DB
2	2	A0A3Q7XNW1|A0A3Q7XNW1_CICAR	R.ATLQPNSLR.R	Y	62.94	998.551	9	4	500.283	2	37.35	261850000	1	11074	Banda_10_827.raw	1	1	72	80			PEAKS DB
2	2	A0A3Q7XNW1|A0A3Q7XNW1_CICAR	K.GGLSIITPPEK.E	Y	61.66	1110.63	11	11	556.322	2	48.54	25073000	1	16707	Banda_10_827.raw	1	1	252	262			PEAKS DB
2	2	A0A3Q7XNW1|A0A3Q7XNW1_CICAR	N.SPFSFLVPPR.S	Y	61.45	1145.62	10	-6	573.819	2	54.96	0	1	20154	Banda_10_827.raw	0	0	482	491			PEAKS DB
2	2	A0A3Q7XNW1|A0A3Q7XNW1_CICAR	R.FSYVAFK.T	N	60.71	860.443	7	-12	431.228	2	51.22	223350000	1	18195	Banda_10_827.raw	2	2	433	439			PEAKS DB
2	2	A0A3Q7XNW1|A0A3Q7XNW1_CICAR	N.IGSSSSPDIYNPQAGR.I	N	60.37	1647.79	16	4	824.9	2	37.84	4458700	1	11377	Banda_10_827.raw	1	1	329	344			PEAKS DB
2	2	A0A3Q7XNW1|A0A3Q7XNW1_CICAR	R.C(+57.02)AGVALSR.A	N	59.51	832.423	8	5	417.219	2	33.77	26284000	1	9635	Banda_10_827.raw	2	2	64	71	Carbamidomethylation	C1:Carbamidomethylation:1000.00	PEAKS DB
2	2	A0A3Q7XNW1|A0A3Q7XNW1_CICAR	R.ALIVPQNFAIAAK.S	N	58.91	1354.8	13	4	678.406	2	54.74	382090000	1	20043	Banda_10_827.raw	1	1	415	427			PEAKS DB
2	2	A0A3Q7XNW1|A0A3Q7XNW1_CICAR	H.YNLNANSILYALK.G	N	58.15	1495.8	13	1	748.909	2	54.33	2795100	1	19740	Banda_10_827.raw	1	1	378	390			PEAKS DB
2	2	A0A3Q7XNW1|A0A3Q7XNW1_CICAR	R.LLGASSLINGMPEEVVAAAFNM(+15.99)ER.N	Y	56.22	2534.25	24	19	845.759	3	57.15	11815000	1	21611	Banda_10_827.raw	1	1	449	472	Oxidation (M)	M22:Oxidation (M):41.98	PEAKS DB
2	2	A0A3Q7XNW1|A0A3Q7XNW1_CICAR	N.SVFDGELEAGR.A	N	54.6	1178.56	11	13	590.286	2	48.89	4633200	1	16768	Banda_10_827.raw	1	1	404	414			PEAKS DB
2	2	A0A3Q7XNW1|A0A3Q7XNW1_CICAR	R.LLGASSLINGM(+15.99)PEEVVAAAFNM(+15.99)ER.N	Y	52.1	2550.25	24	11	1276.13	2	55.34	28286000	1	20395	Banda_10_827.raw	2	2	449	472	Oxidation (M)	M11:Oxidation (M):1000.00;M22:Oxidation (M):1000.00	PEAKS DB
2	2	A0A3Q7XNW1|A0A3Q7XNW1_CICAR	R.Q(-17.03)EEDEDEDEKR.Q	N	51.43	1403.53	11	17	702.775	2	24.2	1684800	1	5488	Banda_10_827.raw	1	1	272	282	Pyro-glu from Q	Q1:Pyro-glu from Q:1000.00	PEAKS DB
2	2	A0A3Q7XNW1|A0A3Q7XNW1_CICAR	R.Q(-17.03)DEDEDEKR.Q	N	50.63	1145.45	9	4	573.731	2	22.95	1452400	1	5028	Banda_10_827.raw	1	1	290	298	Pyro-glu from Q	Q1:Pyro-glu from Q:1000.00	PEAKS DB
2	2	A0A3Q7XNW1|A0A3Q7XNW1_CICAR	R.IKSEGGLIETWNPSNK.Q	N	49.23	1771.91	16	8	591.644	3	52.71	9880800	1	18748	Banda_10_827.raw	1	1	45	60			PEAKS DB
2	2	A0A3Q7XNW1|A0A3Q7XNW1_CICAR	K.VKGGLSIITPPEKEPR.Q	Y	46.45	1719.99	16	13	574.337	3	53.39	4371600	1	19207	Banda_10_827.raw	1	1	250	265			PEAKS DB
2	2	A0A3Q7XNW1|A0A3Q7XNW1_CICAR	T.SFDLPALR.F	N	46.21	917.497	8	6	459.756	2	52.65	4742700	1	18874	Banda_10_827.raw	1	1	350	357			PEAKS DB
2	2	A0A3Q7XNW1|A0A3Q7XNW1_CICAR	R.LQIVNC(+57.02)K.G	Y	44.13	873.474	7	5	437.745	2	38.05	30857000	1	11711	Banda_10_827.raw	1	1	395	401	Carbamidomethylation	C6:Carbamidomethylation:1000.00	PEAKS DB
2	2	A0A3Q7XNW1|A0A3Q7XNW1_CICAR	H.Q(-17.03)NIGSSSSPDIYNPQAGR.I	N	44.07	1872.86	18	5	937.438	2	35.43	120460	1	10316	Banda_10_827.raw	1	1	327	344	Pyro-glu from Q	Q1:Pyro-glu from Q:1000.00	PEAKS DB
2	2	A0A3Q7XNW1|A0A3Q7XNW1_CICAR	R.DQPEQNEC(+57.02)QLEHLNALEPDNR.I	Y	44.06	2548.12	21	10	850.383	3	49.58	1807100	1	17301	Banda_10_827.raw	1	1	24	44	Carbamidomethylation	C8:Carbamidomethylation:1000.00	PEAKS DB
2	2	A0A3Q7XNW1|A0A3Q7XNW1_CICAR	L.NALEPDNR.I	N	42.84	927.441	8	-3	464.728	2	30.56	4708300	1	8198	Banda_10_827.raw	1	1	37	44			PEAKS DB
2	2	A0A3Q7XNW1|A0A3Q7XNW1_CICAR	S.SSPDIYNPQAGR.I	N	42.27	1303.62	12	4	652.815	2	34.37	4628300	1	10007	Banda_10_827.raw	1	1	333	344			PEAKS DB
1	4	A0A1S2Y087|A0A1S2Y087_CICAR	R.NFLAGEDDNVISQIQNPVK.E	Y	106.28	2100.05	19	9	1051.03	2	51.64	162270000	1	18182	Banda_10_827.raw	2	2	525	543			PEAKS DB
1	4	A0A1S2Y087|A0A1S2Y087_CICAR	R.SNLFQNLQNYR.F	Y	79.72	1395.69	11	4	698.852	2	52.29	130180000	1	18475	Banda_10_827.raw	1	1	199	209			PEAKS DB
1	4	A0A1S2Y087|A0A1S2Y087_CICAR	R.QSYFANAQPQQR.E	Y	79.36	1436.68	12	9	719.348	2	37.17	23471000	1	11263	Banda_10_827.raw	1	1	563	574			PEAKS DB
1	4	A0A1S2Y087|A0A1S2Y087_CICAR	R.GSEESEEGDAIVK.V	Y	78.79	1348.6	13	13	675.308	2	30.99	20310000	1	8501	Banda_10_827.raw	2	2	346	358			PEAKS DB
1	4	A0A1S2Y087|A0A1S2Y087_CICAR	K.KSESKEDEEESSSESQGR.R	Y	78.03	2026.86	18	5	1014.44	2	50.19	3598000	1	17671	Banda_10_827.raw	2	2	150	167			PEAKS DB
1	4	A0A1S2Y087|A0A1S2Y087_CICAR	K.LPAGTTAYLANHDDEEDLR.V	Y	77.96	2099.98	19	22	701.001	3	51.38	117860000	1	18028	Banda_10_827.raw	1	1	262	280			PEAKS DB
1	4	A0A1S2Y087|A0A1S2Y087_CICAR	R.Q(-17.03)SYFANAQPQQR.E	Y	77.5	1419.65	12	8	710.834	2	33.57	25476000	1	9693	Banda_10_827.raw	1	1	563	574	Pyro-glu from Q	Q1:Pyro-glu from Q:1000.00	PEAKS DB
1	4	A0A1S2Y087|A0A1S2Y087_CICAR	K.ELTFPGSAQEVNR.L	Y	76.37	1446.71	13	14	724.363	2	46.31	13660000	1	15401	Banda_10_827.raw	2	2	544	556			PEAKS DB
1	4	A0A1S2Y087|A0A1S2Y087_CICAR	R.VLLEEQEPEQSR.G	Y	74.49	1455.72	12	4	728.868	2	38.95	617940000	1	12006	Banda_10_827.raw	4	4	331	342			PEAKS DB
1	4	A0A1S2Y087|A0A1S2Y087_CICAR	R.NEQQEQQQEEDEEQEEEER.N	Y	74.28	2461.96	19	13	1231.99	2	26.37	40343000	1	6582	Banda_10_827.raw	3	3	459	477			PEAKS DB
1	4	A0A1S2Y087|A0A1S2Y087_CICAR	K.E(-18.01)DEEESSSESQGR.R	Y	69.69	1449.55	13	12	725.783	2	18.01	297260	1	3276	Banda_10_827.raw	1	1	155	167	Pyro-glu from E	E1:Pyro-glu from E:1000.00	PEAKS DB
1	4	A0A1S2Y087|A0A1S2Y087_CICAR	K.SILEASFNTK.Y	Y	68.91	1108.58	10	-4	1109.58	1	50.28	39510000	1	17604	Banda_10_827.raw	2	2	315	324			PEAKS DB
1	4	A0A1S2Y087|A0A1S2Y087_CICAR	K.EDEEESSSESQGR.R	Y	68.54	1467.56	13	16	734.788	2	17.89	1393300	1	3229	Banda_10_827.raw	1	1	155	167			PEAKS DB
1	4	A0A1S2Y087|A0A1S2Y087_CICAR	K.SESKEDEEESSSESQGR.R	Y	64.69	1898.76	17	5	633.928	3	31.14	45463000	1	8704	Banda_10_827.raw	2	2	151	167			PEAKS DB
1	4	A0A1S2Y087|A0A1S2Y087_CICAR	K.AILTVLNPNDR.N	N	61.49	1224.68	11	3	613.349	2	56.17	388640000	1	20736	Banda_10_827.raw	1	1	239	249			PEAKS DB
1	4	A0A1S2Y087|A0A1S2Y087_CICAR	R.NPIYSNK.F	N	60.91	834.423	7	9	835.432	1	31.18	173320000	1	8492	Banda_10_827.raw	3	3	392	398			PEAKS DB
1	4	A0A1S2Y087|A0A1S2Y087_CICAR	R.RGSEESEEGDAIVK.V	Y	59.93	1504.7	14	10	502.575	3	49.08	251840000	1	16888	Banda_10_827.raw	2	2	345	358			PEAKS DB
1	4	A0A1S2Y087|A0A1S2Y087_CICAR	K.FFEITPEK.S	N	59.34	1009.51	8	12	505.764	2	50.97	432380000	1	18082	Banda_10_827.raw	2	2	402	409			PEAKS DB
1	4	A0A1S2Y087|A0A1S2Y087_CICAR	G.SEESEEGDAIVK.V	Y	56.71	1291.58	12	5	646.797	2	31.13	14636000	1	8619	Banda_10_827.raw	1	1	347	358			PEAKS DB
1	4	A0A1S2Y087|A0A1S2Y087_CICAR	R.VVELAIPVNRPGK.F	Y	56.59	1390.83	13	10	464.618	3	52.43	147390000	1	18983	Banda_10_827.raw	2	2	281	293			PEAKS DB
1	4	A0A1S2Y087|A0A1S2Y087_CICAR	K.SISSESEPFNLR.S	Y	56.18	1364.66	12	6	683.336	2	48.98	222550000	1	16692	Banda_10_827.raw	2	2	378	389			PEAKS DB
1	4	A0A1S2Y087|A0A1S2Y087_CICAR	R.NEQQEQQQEEDEEQEEEERN.N	Y	55.5	2576	20	9	859.675	3	26.04	9635900	1	6336	Banda_10_827.raw	1	1	459	478			PEAKS DB
1	4	A0A1S2Y087|A0A1S2Y087_CICAR	R.AIVVLFINEGK.G	Y	53.51	1201.71	11	12	601.861	2	54.54	2026600	1	19794	Banda_10_827.raw	1	1	439	449			PEAKS DB
1	4	A0A1S2Y087|A0A1S2Y087_CICAR	R.EQIEELSK.H	N	51.94	974.492	8	0	975.499	1	32.28	495530000	1	8824	Banda_10_827.raw	3	3	362	369			PEAKS DB
1	4	A0A1S2Y087|A0A1S2Y087_CICAR	Y.LANHDDEEDLR.V	Y	51.21	1325.58	11	2	442.869	3	49.14	9923200	1	17061	Banda_10_827.raw	1	1	270	280			PEAKS DB
1	4	A0A1S2Y087|A0A1S2Y087_CICAR	R.NSFNLER.G	Y	49.39	878.425	7	27	440.221	2	42.79	377660000	1	13564	Banda_10_827.raw	2	2	250	256			PEAKS DB
1	4	A0A1S2Y087|A0A1S2Y087_CICAR	R.SRNPIYSNK.F	N	48.9	1077.56	9	12	539.786	2	49.81	71979000	1	17286	Banda_10_827.raw	1	1	390	398			PEAKS DB
1	4	A0A1S2Y087|A0A1S2Y087_CICAR	R.E(-18.01)QIEELSK.H	N	46.64	956.481	8	6	957.489	1	32.31	1620300	1	9062	Banda_10_827.raw	1	1	362	369	Pyro-glu from E	E1:Pyro-glu from E:1000.00	PEAKS DB
1	4	A0A1S2Y087|A0A1S2Y087_CICAR	R.LLQNFDK.R	Y	42.2	876.471	7	10	877.479	1	47.15	79774000	1	16015	Banda_10_827.raw	2	2	191	197			PEAKS DB
1	4	A0A1S2Y087|A0A1S2Y087_CICAR	G.E(-18.01)DDNVISQIQNPVK.E	Y	41.63	1579.78	14	-3	790.899	2	40.5	36131	1	12749	Banda_10_827.raw	1	1	530	543	Pyro-glu from E	E1:Pyro-glu from E:1000.00	PEAKS DB
1	4	A0A1S2Y087|A0A1S2Y087_CICAR	R.QSYFANAQPQQREEE.S	Y	41.57	1823.81	15	17	912.913	2	37.64	994220	1	11383	Banda_10_827.raw	1	1	563	577			PEAKS DB
3	6	sp|Q9SMJ4|LEG_CICAR	R.LHQNIGSSSSPDIYNPQAGR.I	N	111.97	2140.03	20	3	1071.02	2	49.84	205790000	1	17262	Banda_10_827.raw	2	2	322	341			PEAKS DB
3	6	sp|Q9SMJ4|LEG_CICAR	R.YQQEGSEEEENEGGNIFSGFK.R	Y	85.68	2377	21	2	1189.51	2	50.24	115880000	1	17232	Banda_10_827.raw	2	2	194	214			PEAKS DB
3	6	sp|Q9SMJ4|LEG_CICAR	K.GNSVFDGELEAGR.A	N	84.37	1349.62	13	16	675.819	2	46.88	220040000	1	15946	Banda_10_827.raw	2	2	400	412			PEAKS DB
3	6	sp|Q9SMJ4|LEG_CICAR	K.SEGGLIETWNPSNK.Q	N	82.44	1530.73	14	12	766.374	2	49.46	13910000	1	16812	Banda_10_827.raw	1	1	47	60			PEAKS DB
3	6	sp|Q9SMJ4|LEG_CICAR	K.NAM(+15.99)FVPHYNLNANSILYALK.G	N	81.54	2308.17	20	24	770.398	3	55.13	2275700	1	20189	Banda_10_827.raw	1	1	368	387	Oxidation (M)	M3:Oxidation (M):1000.00	PEAKS DB
3	6	sp|Q9SMJ4|LEG_CICAR	R.DNGFEETIC(+57.02)TAR.L	N	78.41	1411.6	12	21	706.811	2	40.92	1436000	1	12746	Banda_10_827.raw	1	1	310	321	Carbamidomethylation	C9:Carbamidomethylation:1000.00	PEAKS DB
3	6	sp|Q9SMJ4|LEG_CICAR	R.DFLEDALNVNR.R	N	76.82	1304.64	11	6	653.326	2	53.51	57896000	1	19632	Banda_10_827.raw	3	3	216	226			PEAKS DB
3	6	sp|Q9SMJ4|LEG_CICAR	K.LSAEFGSLHK.N	N	71.62	1087.57	10	-4	544.79	2	51.51	53158000	1	18414	Banda_10_827.raw	1	1	358	367			PEAKS DB
3	6	sp|Q9SMJ4|LEG_CICAR	R.FSYVAFK.T	N	60.71	860.443	7	-12	431.228	2	51.22	223350000	1	18195	Banda_10_827.raw	2	2	431	437			PEAKS DB
3	6	sp|Q9SMJ4|LEG_CICAR	N.IGSSSSPDIYNPQAGR.I	N	60.37	1647.79	16	4	824.9	2	37.84	4458700	1	11377	Banda_10_827.raw	1	1	326	341			PEAKS DB
3	6	sp|Q9SMJ4|LEG_CICAR	A.C(+57.02)AGVALSR.A	N	59.51	832.423	8	5	417.219	2	33.77	26284000	1	9635	Banda_10_827.raw	2	2	64	71	Carbamidomethylation	C1:Carbamidomethylation:1000.00	PEAKS DB
3	6	sp|Q9SMJ4|LEG_CICAR	R.ALIVPQNFAIAAK.S	N	58.91	1354.8	13	4	678.406	2	54.74	382090000	1	20043	Banda_10_827.raw	1	1	413	425			PEAKS DB
3	6	sp|Q9SMJ4|LEG_CICAR	H.YNLNANSILYALK.G	N	58.15	1495.8	13	1	748.909	2	54.33	2795100	1	19740	Banda_10_827.raw	1	1	375	387			PEAKS DB
3	6	sp|Q9SMJ4|LEG_CICAR	N.SVFDGELEAGR.A	N	54.6	1178.56	11	13	590.286	2	48.89	4633200	1	16768	Banda_10_827.raw	1	1	402	412			PEAKS DB
3	6	sp|Q9SMJ4|LEG_CICAR	R.Q(-17.03)EEDEDEDEKR.Q	N	51.43	1403.53	11	17	702.775	2	24.2	1684800	1	5488	Banda_10_827.raw	1	1	269	279	Pyro-glu from Q	Q1:Pyro-glu from Q:1000.00	PEAKS DB
3	6	sp|Q9SMJ4|LEG_CICAR	R.Q(-17.03)DEDEDEKR.Q	N	50.63	1145.45	9	4	573.731	2	22.95	1452400	1	5028	Banda_10_827.raw	1	1	287	295	Pyro-glu from Q	Q1:Pyro-glu from Q:1000.00	PEAKS DB
3	6	sp|Q9SMJ4|LEG_CICAR	R.IKSEGGLIETWNPSNK.Q	N	49.23	1771.91	16	8	591.644	3	52.71	9880800	1	18748	Banda_10_827.raw	1	1	45	60			PEAKS DB
3	6	sp|Q9SMJ4|LEG_CICAR	H.Q(-17.03)NIGSSSSPDIYNPQAGR.I	N	44.07	1872.86	18	5	937.438	2	35.43	120460	1	10316	Banda_10_827.raw	1	1	324	341	Pyro-glu from Q	Q1:Pyro-glu from Q:1000.00	PEAKS DB
3	6	sp|Q9SMJ4|LEG_CICAR	S.SSPDIYNPQAGR.I	N	42.27	1303.62	12	4	652.815	2	34.37	4628300	1	10007	Banda_10_827.raw	1	1	330	341			PEAKS DB
7	9	A0A1S2XVJ8|A0A1S2XVJ8_CICAR	R.NPESVLTAFSSK.V	Y	88.18	1278.65	12	13	640.331	2	51.68	87561000	1	18413	Banda_10_827.raw	2	2	223	234			PEAKS DB
7	9	A0A1S2XVJ8|A0A1S2XVJ8_CICAR	R.VPAGTPMYLVNR.D	Y	84.61	1316.69	12	8	659.353	2	49.01	7817300	1	16693	Banda_10_827.raw	1	1	178	189			PEAKS DB
7	9	A0A1S2XVJ8|A0A1S2XVJ8_CICAR	K.EDVHGLAPK.R	Y	78.82	964.498	9	-4	483.256	2	49.27	12305000	1	16855	Banda_10_827.raw	1	1	265	273			PEAKS DB
7	9	A0A1S2XVJ8|A0A1S2XVJ8_CICAR	K.GC(+57.02)M(+15.99)STIYYNTNANK.I	Y	76.19	1651.7	14	7	826.856	2	32.09	5705600	1	8866	Banda_10_827.raw	1	1	330	343	Carbamidomethylation; Oxidation (M)	C2:Carbamidomethylation:1000.00;M3:Oxidation (M):1000.00	PEAKS DB
7	9	A0A1S2XVJ8|A0A1S2XVJ8_CICAR	R.NIENYGLAVLEVK.G	Y	75.21	1460.79	13	5	731.401	2	53.98	72156000	1	19407	Banda_10_827.raw	2	2	120	132			PEAKS DB
7	9	A0A1S2XVJ8|A0A1S2XVJ8_CICAR	R.VPAGTPM(+15.99)YLVNR.D	Y	70.85	1332.69	12	10	667.351	2	39.9	12006000	1	12628	Banda_10_827.raw	1	1	178	189	Oxidation (M)	M7:Oxidation (M):1000.00	PEAKS DB
7	9	A0A1S2XVJ8|A0A1S2XVJ8_CICAR	K.EQDQDEDENENPYVFK.S	Y	70.4	1997.81	16	12	999.915	2	39.88	9107500	1	12535	Banda_10_827.raw	1	1	75	90			PEAKS DB
7	9	A0A1S2XVJ8|A0A1S2XVJ8_CICAR	K.EVAYEYPAEK.V	Y	68.61	1197.56	10	6	599.785	2	35.53	27571000	1	10209	Banda_10_827.raw	1	1	435	444			PEAKS DB
7	9	A0A1S2XVJ8|A0A1S2XVJ8_CICAR	R.FNLESGDIMR.V	Y	66.24	1180.55	10	-5	591.284	2	50.9	8498900	1	17857	Banda_10_827.raw	1	1	168	177			PEAKS DB
7	9	A0A1S2XVJ8|A0A1S2XVJ8_CICAR	K.AIIGLVMEDK.T	Y	62.21	1087.59	10	9	544.805	2	53.3	13983000	1	19059	Banda_10_827.raw	1	1	155	164			PEAKS DB
7	9	A0A1S2XVJ8|A0A1S2XVJ8_CICAR	K.IAFVTEGEGDFEM(+15.99)AC(+57.02)PHLK.E	Y	56.11	2165.98	19	17	723	3	53.1	3834700	1	19022	Banda_10_827.raw	1	1	344	362	Oxidation (M); Carbamidomethylation	M13:Oxidation (M):1000.00;C15:Carbamidomethylation:1000.00	PEAKS DB
7	9	A0A1S2XVJ8|A0A1S2XVJ8_CICAR	R.IDTEDGR.V	Y	53.17	804.361	7	21	403.189	2	18.01	31692000	1	3224	Banda_10_827.raw	3	3	98	104			PEAKS DB
7	9	A0A1S2XVJ8|A0A1S2XVJ8_CICAR	R.KEQDQDEDENENPYVFK.S	Y	53.12	2125.91	17	8	709.644	3	50.35	23072000	1	17688	Banda_10_827.raw	2	2	74	90			PEAKS DB
7	9	A0A1S2XVJ8|A0A1S2XVJ8_CICAR	K.AIIGLVM(+15.99)EDK.T	Y	51.96	1103.59	10	21	552.803	2	50.04	13146000	1	17440	Banda_10_827.raw	1	1	155	164	Oxidation (M)	M7:Oxidation (M):1000.00	PEAKS DB
7	9	A0A1S2XVJ8|A0A1S2XVJ8_CICAR	K.AIIGLVMEDKTER.F	Y	49.21	1473.79	13	-9	492.269	3	53.83	1155200	1	19538	Banda_10_827.raw	1	1	155	167			PEAKS DB
7	9	A0A1S2XVJ8|A0A1S2XVJ8_CICAR	K.SKDFDTR.I	Y	42.63	867.409	7	5	434.712	2	48.94	18426000	1	16813	Banda_10_827.raw	1	1	91	97			PEAKS DB
9	5	A0A1S2XYZ0|A0A1S2XYZ0_CICAR	R.Q(-17.03)SHFANAQSQGSQR.R	Y	91.52	1527.68	14	10	764.849	2	29.82	1131100	1	7915	Banda_10_827.raw	1	1	533	546	Pyro-glu from Q	Q1:Pyro-glu from Q:1000.00	PEAKS DB
9	5	A0A1S2XYZ0|A0A1S2XYZ0_CICAR	K.LPAGTIAYLANR.D	N	84.01	1258.7	12	-5	630.359	2	51.1	34681000	1	18282	Banda_10_827.raw	2	2	247	258			PEAKS DB
9	5	A0A1S2XYZ0|A0A1S2XYZ0_CICAR	R.IVDLAIPINTPAK.F	Y	81.66	1363.81	13	0	682.911	2	51.34	42389000	1	17826	Banda_10_827.raw	1	1	266	278			PEAKS DB
9	5	A0A1S2XYZ0|A0A1S2XYZ0_CICAR	K.SISSESEPFNLK.R	Y	72.96	1336.65	12	13	669.334	2	48.08	7531700	1	16146	Banda_10_827.raw	1	1	361	372			PEAKS DB
9	5	A0A1S2XYZ0|A0A1S2XYZ0_CICAR	R.Q(-17.03)QSQEAEVIVK.V	Y	70.85	1240.63	11	9	621.323	2	31.35	13523000	1	8422	Banda_10_827.raw	1	1	331	341	Pyro-glu from Q	Q1:Pyro-glu from Q:1000.00	PEAKS DB
9	5	A0A1S2XYZ0|A0A1S2XYZ0_CICAR	R.NSFNLEC(+57.02)GDTIK.L	Y	68.55	1396.63	12	14	699.323	2	45.47	39900	1	14570	Banda_10_827.raw	1	1	235	246	Carbamidomethylation	C7:Carbamidomethylation:1000.00	PEAKS DB
9	5	A0A1S2XYZ0|A0A1S2XYZ0_CICAR	K.ELAFPGSAQEVDR.L	Y	68.31	1417.68	13	17	709.85	2	47.47	10517000	1	16126	Banda_10_827.raw	1	1	514	526			PEAKS DB
9	5	A0A1S2XYZ0|A0A1S2XYZ0_CICAR	R.E(-18.01)EEEETSSESQGR.R	Y	67.99	1477.58	13	11	739.798	2	18.27	62334	1	3400	Banda_10_827.raw	1	1	140	152	Pyro-glu from E	E1:Pyro-glu from E:1000.00	PEAKS DB
9	5	A0A1S2XYZ0|A0A1S2XYZ0_CICAR	K.AILTVLNSNDR.N	Y	61.59	1214.66	11	-4	608.338	2	50.97	19995000	1	18137	Banda_10_827.raw	1	1	224	234			PEAKS DB
9	5	A0A1S2XYZ0|A0A1S2XYZ0_CICAR	K.GNFELVGLR.N	Y	61.41	1003.54	9	1	502.78	2	52.16	11123000	1	18600	Banda_10_827.raw	1	1	433	441			PEAKS DB
9	5	A0A1S2XYZ0|A0A1S2XYZ0_CICAR	R.ATMVVVVNEGK.G	Y	60.37	1145.61	11	15	573.814	2	41.77	11131000	1	13462	Banda_10_827.raw	1	1	422	432			PEAKS DB
9	5	A0A1S2XYZ0|A0A1S2XYZ0_CICAR	R.QQSQEAEVIVK.V	Y	59.36	1257.66	11	9	629.836	2	32.95	17552000	1	9121	Banda_10_827.raw	1	1	331	341			PEAKS DB
9	5	A0A1S2XYZ0|A0A1S2XYZ0_CICAR	R.ATM(+15.99)VVVVNEGK.G	Y	57.45	1161.61	11	18	581.812	2	31.62	65400	1	8644	Banda_10_827.raw	1	1	422	432	Oxidation (M)	M3:Oxidation (M):1000.00	PEAKS DB
9	5	A0A1S2XYZ0|A0A1S2XYZ0_CICAR	R.EQIEELSK.H	N	51.94	974.492	8	0	975.499	1	32.28	495530000	1	8824	Banda_10_827.raw	3	3	345	352			PEAKS DB
9	5	A0A1S2XYZ0|A0A1S2XYZ0_CICAR	R.KSISSESEPFNLK.R	Y	51.78	1464.75	13	20	733.382	2	51.76	680570	1	18365	Banda_10_827.raw	1	1	360	372			PEAKS DB
9	5	A0A1S2XYZ0|A0A1S2XYZ0_CICAR	K.SISSESEPFNLKR.R	Y	50.32	1492.75	13	42	498.593	3	52.05	121640000	1	18084	Banda_10_827.raw	1	1	361	373			PEAKS DB
9	5	A0A1S2XYZ0|A0A1S2XYZ0_CICAR	R.ILLEEPQQR.R	Y	49.07	1124.62	9	7	563.317	2	41.45	22399000	1	13946	Banda_10_827.raw	1	1	316	324			PEAKS DB
9	5	A0A1S2XYZ0|A0A1S2XYZ0_CICAR	R.DSNEDLR.I	Y	47.11	847.367	7	0	424.691	2	17.9	1402200	1	3233	Banda_10_827.raw	1	1	259	265			PEAKS DB
9	5	A0A1S2XYZ0|A0A1S2XYZ0_CICAR	R.E(-18.01)QIEELSK.H	N	46.64	956.481	8	6	957.489	1	32.31	1620300	1	9062	Banda_10_827.raw	1	1	345	352	Pyro-glu from E	E1:Pyro-glu from E:1000.00	PEAKS DB
5	10	A0A1S2XSB9|A0A1S2XSB9_CICAR	K.NAM(+15.99)FVPHYNLNANSILYALK.G	N	81.54	2308.17	20	24	770.398	3	55.13	2275700	1	20189	Banda_10_827.raw	1	1	390	409	Oxidation (M)	M3:Oxidation (M):1000.00	PEAKS DB
5	10	A0A1S2XSB9|A0A1S2XSB9_CICAR	R.DNGFEETIC(+57.02)TAR.L	N	78.41	1411.6	12	21	706.811	2	40.92	1436000	1	12746	Banda_10_827.raw	1	1	332	343	Carbamidomethylation	C9:Carbamidomethylation:1000.00	PEAKS DB
5	10	A0A1S2XSB9|A0A1S2XSB9_CICAR	R.DFLEDALNVNR.H	N	76.82	1304.64	11	6	653.326	2	53.51	57896000	1	19632	Banda_10_827.raw	3	3	218	228			PEAKS DB
5	10	A0A1S2XSB9|A0A1S2XSB9_CICAR	K.TVTSFDLPALR.W	N	70.25	1218.66	11	4	610.338	2	57.19	274580000	1	21221	Banda_10_827.raw	1	1	366	376			PEAKS DB
5	10	A0A1S2XSB9|A0A1S2XSB9_CICAR	R.FSYVAFK.T	N	60.71	860.443	7	-12	431.228	2	51.22	223350000	1	18195	Banda_10_827.raw	2	2	452	458			PEAKS DB
5	10	A0A1S2XSB9|A0A1S2XSB9_CICAR	R.C(+57.02)AGVALSR.A	N	59.51	832.423	8	5	417.219	2	33.77	26284000	1	9635	Banda_10_827.raw	2	2	64	71	Carbamidomethylation	C1:Carbamidomethylation:1000.00	PEAKS DB
5	10	A0A1S2XSB9|A0A1S2XSB9_CICAR	H.YNLNANSILYALK.G	N	58.15	1495.8	13	1	748.909	2	54.33	2795100	1	19740	Banda_10_827.raw	1	1	397	409			PEAKS DB
5	10	A0A1S2XSB9|A0A1S2XSB9_CICAR	R.IESEGGLIETWNPNNR.Q	Y	57.58	1827.88	16	3	914.945	2	50.28	1709300	1	17696	Banda_10_827.raw	1	1	45	60			PEAKS DB
5	10	A0A1S2XSB9|A0A1S2XSB9_CICAR	R.FYLAGNQEQEFLQYQQQEGR.K	Y	55.62	2475.15	20	8	1238.58	2	50.7	138550	1	17660	Banda_10_827.raw	1	1	181	200			PEAKS DB
5	10	A0A1S2XSB9|A0A1S2XSB9_CICAR	R.LQVVNC(+57.02)NGNNVFDGELEAGR.A	Y	54.76	2204.03	20	-65	1103.01	2	49.23	0	1	16891	Banda_10_827.raw	0	0	414	433	Carbamidomethylation	C6:Carbamidomethylation:1000.00	PEAKS DB
5	10	A0A1S2XSB9|A0A1S2XSB9_CICAR	R.Q(-17.03)DEDEDEKR.R	N	50.63	1145.45	9	4	573.731	2	22.95	1452400	1	5028	Banda_10_827.raw	1	1	291	299	Pyro-glu from Q	Q1:Pyro-glu from Q:1000.00	PEAKS DB
5	10	A0A1S2XSB9|A0A1S2XSB9_CICAR	T.SFDLPALR.W	N	46.21	917.497	8	6	459.756	2	52.65	4742700	1	18874	Banda_10_827.raw	1	1	369	376			PEAKS DB
5	10	A0A1S2XSB9|A0A1S2XSB9_CICAR	R.LHQNIDSSSSPDIYIPQAGR.I	Y	45.58	2197.08	20	8	733.367	3	51	4581500	1	17740	Banda_10_827.raw	1	1	344	363			PEAKS DB
5	10	A0A1S2XSB9|A0A1S2XSB9_CICAR	K.GGLSFISPSEK.Q	Y	43.57	1120.58	11	-3	561.295	2	49.66	6271400	1	17263	Banda_10_827.raw	1	1	251	261			PEAKS DB
5	10	A0A1S2XSB9|A0A1S2XSB9_CICAR	L.NALEPDNR.I	N	42.84	927.441	8	-3	464.728	2	30.56	4708300	1	8198	Banda_10_827.raw	1	1	37	44			PEAKS DB
10	11	A0A1S2XQ88|A0A1S2XQ88_CICAR	K.LPAGTIAYLANR.D	N	84.01	1258.7	12	-5	630.359	2	51.1	34681000	1	18282	Banda_10_827.raw	2	2	122	133			PEAKS DB
10	11	A0A1S2XQ88|A0A1S2XQ88_CICAR	K.ILEASFNSDYEEIER.V	N	78.9	1813.84	15	11	907.927	2	50.1	11783000	1	17433	Banda_10_827.raw	1	1	176	190			PEAKS DB
10	11	A0A1S2XQ88|A0A1S2XQ88_CICAR	K.EVAFPGSAEEVDR.L	N	72.69	1404.65	13	25	703.335	2	43.53	5665300	1	14075	Banda_10_827.raw	1	1	405	417			PEAKS DB
10	11	A0A1S2XQ88|A0A1S2XQ88_CICAR	R.AILTVLNPNDR.N	N	61.49	1224.68	11	3	613.349	2	56.17	388640000	1	20736	Banda_10_827.raw	1	1	99	109			PEAKS DB
10	11	A0A1S2XQ88|A0A1S2XQ88_CICAR	R.Q(-17.03)QSQETDVIVK.I	Y	60.56	1256.62	11	13	629.321	2	30.4	1298500	1	8167	Banda_10_827.raw	1	1	210	220	Pyro-glu from Q	Q1:Pyro-glu from Q:1000.00	PEAKS DB
10	11	A0A1S2XQ88|A0A1S2XQ88_CICAR	R.Q(-17.03)SHFANAQPQQK.R	N	59.73	1365.64	12	5	683.829	2	30.15	774340	1	8035	Banda_10_827.raw	1	1	424	435	Pyro-glu from Q	Q1:Pyro-glu from Q:1000.00	PEAKS DB
10	11	A0A1S2XQ88|A0A1S2XQ88_CICAR	N.FFEITPEK.N	N	59.34	1009.51	8	12	505.764	2	50.97	432380000	1	18082	Banda_10_827.raw	2	2	264	271			PEAKS DB
10	11	A0A1S2XQ88|A0A1S2XQ88_CICAR	R.QQSQETDVIVK.I	Y	56	1273.65	11	8	637.833	2	31.98	1568700	1	8807	Banda_10_827.raw	1	1	210	220			PEAKS DB
10	11	A0A1S2XQ88|A0A1S2XQ88_CICAR	R.EQIEELSK.N	N	51.94	974.492	8	0	975.499	1	32.28	495530000	1	8824	Banda_10_827.raw	3	3	224	231			PEAKS DB
10	11	A0A1S2XQ88|A0A1S2XQ88_CICAR	R.SQLFENLQNYR.L	N	51.02	1410.69	11	9	706.352	2	51.24	8129800	1	18105	Banda_10_827.raw	1	1	59	69			PEAKS DB
10	11	A0A1S2XQ88|A0A1S2XQ88_CICAR	R.ATVILVVNEGK.G	N	47.78	1141.67	11	1	571.843	2	47.91	3681400	1	15948	Banda_10_827.raw	1	1	301	311			PEAKS DB
10	11	A0A1S2XQ88|A0A1S2XQ88_CICAR	R.E(-18.01)QIEELSK.N	N	46.64	956.481	8	6	957.489	1	32.31	1620300	1	9062	Banda_10_827.raw	1	1	224	231	Pyro-glu from E	E1:Pyro-glu from E:1000.00	PEAKS DB
12	18	Q304D4|Q304D4_CICAR	R.QQSQSQSQQEADVIVK.I	Y	90.84	1801.88	16	9	901.948	2	31.93	3269900	1	8991	Banda_10_827.raw	1	1	205	220			PEAKS DB
12	18	Q304D4|Q304D4_CICAR	K.EVAFPGSAEEVDR.L	N	72.69	1404.65	13	25	703.335	2	43.53	5665300	1	14075	Banda_10_827.raw	1	1	405	417			PEAKS DB
12	18	Q304D4|Q304D4_CICAR	R.NPIYSNK.Y	N	60.91	834.423	7	9	835.432	1	31.18	173320000	1	8492	Banda_10_827.raw	3	3	254	260			PEAKS DB
12	18	Q304D4|Q304D4_CICAR	R.Q(-17.03)SHFANAQPQQK.D	N	59.73	1365.64	12	5	683.829	2	30.15	774340	1	8035	Banda_10_827.raw	1	1	424	435	Pyro-glu from Q	Q1:Pyro-glu from Q:1000.00	PEAKS DB
12	18	Q304D4|Q304D4_CICAR	N.FFEITPEK.N	N	59.34	1009.51	8	12	505.764	2	50.97	432380000	1	18082	Banda_10_827.raw	2	2	264	271			PEAKS DB
12	18	Q304D4|Q304D4_CICAR	R.EQIEELSK.N	N	51.94	974.492	8	0	975.499	1	32.28	495530000	1	8824	Banda_10_827.raw	3	3	224	231			PEAKS DB
12	18	Q304D4|Q304D4_CICAR	Q.Q(-17.03)EADVIVK.I	N	49.64	883.465	8	3	884.473	1	32.52	246500	1	9267	Banda_10_827.raw	2	2	213	220	Pyro-glu from Q	Q1:Pyro-glu from Q:1000.00	PEAKS DB
12	18	Q304D4|Q304D4_CICAR	R.SRNPIYSNK.Y	N	48.9	1077.56	9	12	539.786	2	49.81	71979000	1	17286	Banda_10_827.raw	1	1	252	260			PEAKS DB
12	18	Q304D4|Q304D4_CICAR	R.ATVILVVNEGK.G	N	47.78	1141.67	11	1	571.843	2	47.91	3681400	1	15948	Banda_10_827.raw	1	1	301	311			PEAKS DB
12	18	Q304D4|Q304D4_CICAR	R.E(-18.01)QIEELSK.N	N	46.64	956.481	8	6	957.489	1	32.31	1620300	1	9062	Banda_10_827.raw	1	1	224	231	Pyro-glu from E	E1:Pyro-glu from E:1000.00	PEAKS DB
18	13	A0A1S2XKM3|A0A1S2XKM3_CICAR	K.EYVFVANSDNLGAIVDLK.I	Y	70.7	1966	18	-8	984.009	2	54.23	1957100	1	19678	Banda_10_827.raw	1	1	215	232			PEAKS DB
18	13	A0A1S2XKM3|A0A1S2XKM3_CICAR	K.VLQLETAAGAAIR.F	Y	68.15	1311.75	13	5	656.883	2	49.91	7302900	1	17131	Banda_10_827.raw	1	1	330	342			PEAKS DB
18	13	A0A1S2XKM3|A0A1S2XKM3_CICAR	R.TNPENPSIELGPEFK.K	Y	67.46	1670.82	15	16	836.416	2	48.11	3186300	1	16288	Banda_10_827.raw	1	1	388	402			PEAKS DB
18	13	A0A1S2XKM3|A0A1S2XKM3_CICAR	K.SIPSIVELDSLK.V	Y	66.75	1299.73	12	12	650.872	2	53.45	8509800	1	19152	Banda_10_827.raw	1	1	413	424			PEAKS DB
18	13	A0A1S2XKM3|A0A1S2XKM3_CICAR	K.ASSDLLLVQSDLYTLEDGSVIR.N	Y	64.26	2393.23	22	2	1197.62	2	56	965880	1	20554	Banda_10_827.raw	1	1	362	383			PEAKS DB
18	13	A0A1S2XKM3|A0A1S2XKM3_CICAR	R.LVVDDFLPLPSK.G	Y	56.46	1341.75	12	7	671.885	2	54.77	7116500	1	19908	Banda_10_827.raw	1	1	169	180			PEAKS DB
18	13	A0A1S2XKM3|A0A1S2XKM3_CICAR	K.LDALLSQGK.E	Y	44.21	943.534	9	6	472.774	2	44.2	8873100	1	14580	Banda_10_827.raw	1	1	206	214			PEAKS DB
20	17	A0A1S2YP09|A0A1S2YP09_CICAR	R.SIDIIGLGTGPELEK.K	Y	75.72	1540.83	15	-25	771.423	2	52.87	0	1	19047	Banda_10_827.raw	0	0	227	241			PEAKS DB
20	17	A0A1S2YP09|A0A1S2YP09_CICAR	K.TIEVNNTDAEGR.L	Y	63.81	1317.62	12	7	659.816	2	30.38	305500	1	8288	Banda_10_827.raw	1	1	417	428			PEAKS DB
20	17	A0A1S2YP09|A0A1S2YP09_CICAR	K.LGGLLAEASSEEDFSGK.V	Y	60.08	1708.82	17	1	855.415	2	52.05	1112400	1	18498	Banda_10_827.raw	1	1	113	129			PEAKS DB
20	17	A0A1S2YP09|A0A1S2YP09_CICAR	K.EVLEASEVSGEK.L	Y	50.4	1275.62	12	8	638.817	2	32.09	1120200	1	9760	Banda_10_827.raw	1	1	477	488			PEAKS DB
20	17	A0A1S2YP09|A0A1S2YP09_CICAR	K.SAQASNVAIVLASSEGLSSQSK.L	Y	46.88	2133.09	22	6	1067.55	2	49.31	494850	1	16750	Banda_10_827.raw	1	1	174	195			PEAKS DB
20	17	A0A1S2YP09|A0A1S2YP09_CICAR	R.Q(-17.03)GGSITAALFLK.Q	Y	45.56	1187.65	12	4	594.835	2	54.33	768990	1	19793	Banda_10_827.raw	1	1	516	527	Pyro-glu from Q	Q1:Pyro-glu from Q:1000.00	PEAKS DB
23	16	A0A1S2YRP8|A0A1S2YRP8_CICAR	R.VAEGDAEDINR.A	Y	70.57	1187.54	11	0	594.778	2	28.89	4934900	1	7731	Banda_10_827.raw	2	2	87	97			PEAKS DB
23	16	A0A1S2YRP8|A0A1S2YRP8_CICAR	K.VAFTGSTDTGK.A	Y	65.68	1082.52	11	1	542.269	2	31.63	6021700	1	8689	Banda_10_827.raw	1	1	276	286			PEAKS DB
23	16	A0A1S2YRP8|A0A1S2YRP8_CICAR	R.YGLAAGVFTK.N	Y	61.62	1025.55	10	-10	513.784	2	51.69	5028100	1	18341	Banda_10_827.raw	1	1	460	469			PEAKS DB
23	16	A0A1S2YRP8|A0A1S2YRP8_CICAR	K.GVEQGPQIDSEQFEK.V	Y	61.3	1689.78	15	7	845.9	2	38.38	4408100	1	11616	Banda_10_827.raw	1	1	373	387			PEAKS DB
23	16	A0A1S2YRP8|A0A1S2YRP8_CICAR	K.DEIFGPVQSILK.F	Y	57.31	1344.73	12	3	673.372	2	54.49	1598800	1	19816	Banda_10_827.raw	1	1	433	444			PEAKS DB
23	16	A0A1S2YRP8|A0A1S2YRP8_CICAR	K.VGPALAC(+57.02)GNTIVLK.S	Y	56.4	1411.79	14	6	706.9	2	49.1	1875900	1	16916	Banda_10_827.raw	1	1	214	227	Carbamidomethylation	C7:Carbamidomethylation:1000.00	PEAKS DB
23	16	A0A1S2YRP8|A0A1S2YRP8_CICAR	R.SGIDSNATLEC(+57.02)GGER.F	Y	47.61	1564.68	15	-12	783.346	2	33.62	1371500	1	9995	Banda_10_827.raw	1	1	394	408	Carbamidomethylation	C11:Carbamidomethylation:1000.00	PEAKS DB
24	21	A0A1S2XET4|A0A1S2XET4_CICAR	K.AAANVVEGAAR.Y	Y	72.24	1027.54	11	1	514.778	2	31.4	13066000	1	8473	Banda_10_827.raw	1	1	383	393			PEAKS DB
24	21	A0A1S2XET4|A0A1S2XET4_CICAR	K.TAAEYVSPVAEK.T	Y	68.9	1263.63	12	6	632.825	2	35.77	2708300	1	10393	Banda_10_827.raw	1	1	339	350			PEAKS DB
24	21	A0A1S2XET4|A0A1S2XET4_CICAR	K.GLAASAGESAK.E	Y	66.44	960.487	11	7	481.251	2	30.04	4901600	1	8253	Banda_10_827.raw	1	1	412	422			PEAKS DB
24	21	A0A1S2XET4|A0A1S2XET4_CICAR	K.VIVVGEGDVEEK.Q	Y	62.71	1271.66	12	9	636.838	2	39.76	2691900	1	12363	Banda_10_827.raw	1	1	625	636			PEAKS DB
24	21	A0A1S2XET4|A0A1S2XET4_CICAR	K.SQQGYEATK.D	Y	51.48	1010.47	9	-10	506.24	2	17.89	138260	1	3236	Banda_10_827.raw	1	1	289	297			PEAKS DB
14	15	A0A1S3E3A7|A0A1S3E3A7_CICAR	R.IPSAVGYQPTLSTDLGGLQER.I	Y	65.19	2201.13	21	1	734.718	3	50.73	3817400	1	17641	Banda_10_827.raw	2	2	352	372			PEAKS DB
14	15	A0A1S3E3A7|A0A1S3E3A7_CICAR	R.VLNTGSPITVPVGR.A	Y	63.43	1408.8	14	8	705.41	2	47.18	4742400	1	15600	Banda_10_827.raw	1	1	150	163			PEAKS DB
14	15	A0A1S3E3A7|A0A1S3E3A7_CICAR	K.IGLFGGAGVGK.T	N	59.78	974.555	11	9	488.285	2	52.4	5685600	1	18657	Banda_10_827.raw	1	1	227	237			PEAKS DB
14	15	A0A1S3E3A7|A0A1S3E3A7_CICAR	R.QISELGIYPAVDPLDSTSR.M	Y	55.52	2060.04	19	5	1031.03	2	54.96	500120	1	20052	Banda_10_827.raw	1	1	415	433			PEAKS DB
14	15	A0A1S3E3A7|A0A1S3E3A7_CICAR	R.EAPAFVEQATEQEILVTGIK.V	Y	53.15	2172.13	20	6	725.052	3	53.65	238300	1	19406	Banda_10_827.raw	1	1	194	213			PEAKS DB
14	15	A0A1S3E3A7|A0A1S3E3A7_CICAR	R.FTQANSEVSALLGR.I	Y	51.85	1491.77	14	13	746.892	2	51.14	2559500	1	18220	Banda_10_827.raw	1	1	338	351			PEAKS DB
14	15	A0A1S3E3A7|A0A1S3E3A7_CICAR	K.TVLIMELINNVAK.A	Y	47.62	1456.83	13	17	729.425	2	58.23	408340	1	21585	Banda_10_827.raw	1	1	238	250			PEAKS DB
14	15	A0A1S3E3A7|A0A1S3E3A7_CICAR	K.VVDMLAPYQR.G	Y	44.37	1190.61	10	1	596.313	2	50.59	724090	1	17567	Banda_10_827.raw	1	1	214	223			PEAKS DB
16	20	A0A1S2XV08|A0A1S2XV08_CICAR	K.NNPNILNNLIYTPLTITPEGEYR.M	Y	73.52	2658.37	23	6	887.13	3	55.95	4346200	1	20882	Banda_10_827.raw	2	2	246	268			PEAKS DB
16	20	A0A1S2XV08|A0A1S2XV08_CICAR	R.TPLM(+15.99)QLPVLIDLNGK.H	Y	62.87	1666.93	15	15	834.475	2	54.53	0	1	19942	Banda_10_827.raw	0	0	64	78	Oxidation (M)	M4:Oxidation (M):1000.00	PEAKS DB
16	20	A0A1S2XV08|A0A1S2XV08_CICAR	R.QLEENLLLFDLVESK.L	Y	59.79	1788.95	15	7	895.483	2	62.59	85525	1	23482	Banda_10_827.raw	1	1	402	416			PEAKS DB
16	20	A0A1S2XV08|A0A1S2XV08_CICAR	R.TPLMQLPVLIDLNGK.H	Y	56.86	1650.94	15	28	826.479	2	56.41	348710	1	20758	Banda_10_827.raw	1	1	64	78			PEAKS DB
16	20	A0A1S2XV08|A0A1S2XV08_CICAR	K.LGFSNSLSSR.G	Y	51.85	1066.54	10	3	534.278	2	48.3	4047900	1	16402	Banda_10_827.raw	1	1	417	426			PEAKS DB
16	20	A0A1S2XV08|A0A1S2XV08_CICAR	K.EAQVNAVGPFGLC(+57.02)FDSK.R	Y	45.91	1837.87	17	-8	919.94	2	52.52	828690	1	18899	Banda_10_827.raw	1	1	330	346	Carbamidomethylation	C13:Carbamidomethylation:1000.00	PEAKS DB
16	20	A0A1S2XV08|A0A1S2XV08_CICAR	K.ATISIGSR.Q	Y	43.93	803.45	8	3	402.732	2	37.24	4947300	1	11167	Banda_10_827.raw	1	1	394	401			PEAKS DB
16	20	A0A1S2XV08|A0A1S2XV08_CICAR	K.SNGAIIFGDAANNM(+15.99)R.F	Y	42.07	1565.73	15	19	783.872	2	46.82	0	1	15669	Banda_10_827.raw	0	0	223	237	Oxidation (M)	M14:Oxidation (M):1000.00	PEAKS DB
25	32	A0A3Q7YAD4|A0A3Q7YAD4_CICAR	K.TYLPSETPSPLVK.Y	Y	76.99	1430.77	13	11	716.391	2	47.97	2620200	1	16257	Banda_10_827.raw	1	1	170	182			PEAKS DB
25	32	A0A3Q7YAD4|A0A3Q7YAD4_CICAR	K.NVLDYNTIISIGGGNVR.G	Y	66.67	1803.95	17	-2	902.981	2	53.1	1337300	1	19516	Banda_10_827.raw	1	1	25	41			PEAKS DB
25	32	A0A3Q7YAD4|A0A3Q7YAD4_CICAR	R.SVSLQLISATK.S	N	53.24	1145.67	11	2	573.84	2	50.26	7430300	1	17244	Banda_10_827.raw	1	1	65	75			PEAKS DB
25	32	A0A3Q7YAD4|A0A3Q7YAD4_CICAR	K.SNLDPTIYGDQTSK.I	Y	44.74	1537.73	14	3	769.87	2	38.1	856010	1	11502	Banda_10_827.raw	1	1	391	404			PEAKS DB
28	33	A0A1S2YEM1|A0A1S2YEM1_CICAR	K.LGYADLVEEVSLGDGK.I	Y	83.59	1663.83	16	19	832.924	2	54.03	2728400	1	19599	Banda_10_827.raw	1	1	348	363			PEAKS DB
28	33	A0A1S2YEM1|A0A1S2YEM1_CICAR	K.LGGTVDDTELVK.G	Y	69.53	1245.65	12	0	623.83	2	39.9	3332300	1	13180	Banda_10_827.raw	2	2	204	215			PEAKS DB
28	33	A0A1S2YEM1|A0A1S2YEM1_CICAR	K.IAVIQFQISPPK.T	Y	66.06	1339.79	12	17	670.902	2	52.33	0	1	18728	Banda_10_827.raw	0	0	238	249			PEAKS DB
28	33	A0A1S2YEM1|A0A1S2YEM1_CICAR	R.Q(-17.03)ANIIAAR.S	Y	50.94	838.466	8	-13	420.24	2	33.64	232390	1	9579	Banda_10_827.raw	1	1	25	32	Pyro-glu from Q	Q1:Pyro-glu from Q:1000.00	PEAKS DB
32	34	A0A1S3EHZ1|A0A1S3EHZ1_CICAR	K.IVGPNEVEVTQLDGTK.L	Y	72.53	1697.88	16	18	849.951	2	43.96	7473300	1	14364	Banda_10_827.raw	1	1	147	162			PEAKS DB
32	34	A0A1S3EHZ1|A0A1S3EHZ1_CICAR	K.ILVYGASYGGELEDAR.N	Y	68.91	1711.84	16	0	856.928	2	50.72	2802500	1	18000	Banda_10_827.raw	1	1	82	97			PEAKS DB
32	34	A0A1S3EHZ1|A0A1S3EHZ1_CICAR	R.TNIPSIWAVGDVTNR.M	Y	68.89	1641.85	15	16	821.932	2	53.25	3581300	1	19024	Banda_10_827.raw	1	1	327	341			PEAKS DB
32	34	A0A1S3EHZ1|A0A1S3EHZ1_CICAR	K.TGAIVVNEDSR.T	Y	68.57	1159.58	11	8	580.799	2	32.08	620700	1	8928	Banda_10_827.raw	1	1	316	326			PEAKS DB
32	34	A0A1S3EHZ1|A0A1S3EHZ1_CICAR	K.LVVDAETDK.V	Y	53.39	988.508	9	-11	495.261	2	31.95	2876900	1	8781	Banda_10_827.raw	1	1	425	433			PEAKS DB
22	19	A0A1S2YB61|A0A1S2YB61_CICAR	K.NAVFGDSSALAPGGVR.I	Y	64.76	1516.76	16	11	759.39	2	48.63	5254500	1	16355	Banda_10_827.raw	1	1	374	389			PEAKS DB
22	19	A0A1S2YB61|A0A1S2YB61_CICAR	K.ANAVALGNYLISK.G	Y	61.12	1332.74	13	6	667.378	2	51.2	10487000	1	18491	Banda_10_827.raw	1	1	320	332			PEAKS DB
22	19	A0A1S2YB61|A0A1S2YB61_CICAR	K.VNSSTGFIDYDRLEEK.A	Y	56.49	1871.89	16	-11	936.951	2	52.1	6695800	1	18883	Banda_10_827.raw	2	2	161	176			PEAKS DB
22	19	A0A1S2YB61|A0A1S2YB61_CICAR	K.YSEGM(+15.99)PGNR.Y	Y	53.92	1025.42	9	-6	513.719	2	26.27	2224700	1	6537	Banda_10_827.raw	1	1	59	67	Oxidation (M)	M5:Oxidation (M):1000.00	PEAKS DB
22	19	A0A1S2YB61|A0A1S2YB61_CICAR	K.ISATSIYFESLPYK.V	Y	49.72	1617.83	14	6	809.922	2	53.51	6123700	1	19312	Banda_10_827.raw	1	1	147	160			PEAKS DB
22	19	A0A1S2YB61|A0A1S2YB61_CICAR	K.Q(-17.03)ATTPGFK.A	Y	45.96	831.413	8	15	832.421	1	28.54	907290	1	7342	Banda_10_827.raw	1	1	305	312	Pyro-glu from Q	Q1:Pyro-glu from Q:1000.00	PEAKS DB
22	19	A0A1S2YB61|A0A1S2YB61_CICAR	K.LIIC(+57.02)GGSAYPR.D	Y	45.82	1205.62	11	6	603.819	2	48.03	3730200	1	16148	Banda_10_827.raw	1	1	184	194	Carbamidomethylation	C4:Carbamidomethylation:1000.00	PEAKS DB
21	24	A0A1S2XHQ9|A0A1S2XHQ9_CICAR	R.VETGVIKPGVIVTFGPTGLTTEVK.S	Y	67.56	2441.38	24	19	814.802	3	54.38	12107000	1	19675	Banda_10_827.raw	1	1	255	278			PEAKS DB
21	24	A0A1S2XHQ9|A0A1S2XHQ9_CICAR	K.IGGIGTVPVGR.V	Y	63.36	1024.6	11	7	513.309	2	45.9	16865000	1	15389	Banda_10_827.raw	1	1	244	254			PEAKS DB
21	24	A0A1S2XHQ9|A0A1S2XHQ9_CICAR	K.M(+15.99)IPTKPMVVETFSEYPPLGR.F	Y	58.24	2307.16	20	19	770.063	3	54.03	685050	1	19593	Banda_10_827.raw	1	1	392	411	Oxidation (M)	M1:Oxidation (M):0.00	PEAKS DB
21	24	A0A1S2XHQ9|A0A1S2XHQ9_CICAR	R.LPLQDVYK.I	Y	46.77	974.544	8	10	488.28	2	48.8	14548000	1	16601	Banda_10_827.raw	1	1	236	243			PEAKS DB
21	24	A0A1S2XHQ9|A0A1S2XHQ9_CICAR	R.Q(-17.03)TVAVGVIK.S	Y	46.62	896.533	9	9	897.541	1	37.31	2220300	1	11334	Banda_10_827.raw	1	1	419	427	Pyro-glu from Q	Q1:Pyro-glu from Q:1000.00	PEAKS DB
21	24	A0A1S2XHQ9|A0A1S2XHQ9_CICAR	R.QTVAVGVIK.S	Y	46	913.56	9	14	457.788	2	41.85	6070400	1	13470	Banda_10_827.raw	1	1	419	427			PEAKS DB
21	24	A0A1S2XHQ9|A0A1S2XHQ9_CICAR	K.M(+15.99)IPTKPM(+15.99)VVETFSEYPPLGR.F	Y	43.94	2323.16	20	-8	775.393	3	53.22	3789300	1	19179	Banda_10_827.raw	1	1	392	411	Oxidation (M)	M1:Oxidation (M):1000.00;M7:Oxidation (M):1000.00	PEAKS DB
36	35	A0A1S2XLB4|A0A1S2XLB4_CICAR	K.SETSSSASVELNSR.N	Y	86.67	1452.67	14	12	727.343	2	30.71	6567900	1	8306	Banda_10_827.raw	1	1	155	168			PEAKS DB
36	35	A0A1S2XLB4|A0A1S2XLB4_CICAR	K.NVGVGGYGYPALVALNIK.K	Y	53.03	1803.99	18	9	903.002	2	54.68	3825400	1	19837	Banda_10_827.raw	1	1	345	362			PEAKS DB
36	35	A0A1S2XLB4|A0A1S2XLB4_CICAR	R.DVKPIAEFALQQVK.A	Y	52.68	1584.89	14	0	529.303	3	53.3	3897200	1	19139	Banda_10_827.raw	1	1	123	136			PEAKS DB
36	35	A0A1S2XLB4|A0A1S2XLB4_CICAR	K.GNLPLSGTPTIVK.T	Y	50.24	1295.74	13	12	648.88	2	48.07	6060800	1	16443	Banda_10_827.raw	1	1	391	403			PEAKS DB
30	31	A0A1S2Z6B6|A0A1S2Z6B6_CICAR	K.ITATTTGSVTLK.L	Y	72.84	1191.67	12	13	596.844	2	36.58	4474400	1	11068	Banda_10_827.raw	1	1	410	421			PEAKS DB
30	31	A0A1S2Z6B6|A0A1S2Z6B6_CICAR	R.LSPATLLAELNEIGGK.H	Y	58.15	1624.9	16	16	813.46	2	56.98	745220	1	21466	Banda_10_827.raw	1	1	314	329			PEAKS DB
30	31	A0A1S2Z6B6|A0A1S2Z6B6_CICAR	K.YAELVYAGR.W	Y	57.16	1040.53	9	13	521.273	2	46.88	2953500	1	15670	Banda_10_827.raw	1	1	386	394			PEAKS DB
30	31	A0A1S2Z6B6|A0A1S2Z6B6_CICAR	R.ELEFLTLDR.E	Y	49.75	1134.59	9	-1	568.303	2	54.15	1237700	1	19777	Banda_10_827.raw	1	1	365	373			PEAKS DB
30	31	A0A1S2Z6B6|A0A1S2Z6B6_CICAR	R.QDISSFEGSDIYDQADAAGFIR.L	Y	43.66	2404.08	22	-7	1203.05	2	51.46	0	1	18201	Banda_10_827.raw	0	0	441	462			PEAKS DB
35	38	O65744|O65744_CICAR	K.VLGVSSEGETAK.C	Y	73.43	1175.6	12	10	588.81	2	31.75	10067000	1	8917	Banda_10_827.raw	1	1	266	277			PEAKS DB
35	38	O65744|O65744_CICAR	M(+42.01)DEEYDVIVLGTGLK.E	Y	64.1	1722.84	15	18	862.428	2	56.85	324560	1	21045	Banda_10_827.raw	1	1	1	15	Acetylation (Protein N-term)	M1:Acetylation (Protein N-term):1000.00	PEAKS DB
35	38	O65744|O65744_CICAR	K.EC(+57.02)ILSGLLSVDGLK.V	Y	47.11	1502.8	14	9	752.409	2	55.87	842090	1	20436	Banda_10_827.raw	1	1	16	29	Carbamidomethylation	C2:Carbamidomethylation:1000.00	PEAKS DB
34	39	Q9AT06|Q9AT06_CICAR	K.IINSDNVQEAAR.E	Y	74.14	1328.67	12	8	665.342	2	31.74	4413400	1	8895	Banda_10_827.raw	1	1	479	490			PEAKS DB
34	39	Q9AT06|Q9AT06_CICAR	K.VDTTILGLDEER.A	Y	57.01	1359.69	12	3	680.852	2	50.08	397600	1	17065	Banda_10_827.raw	1	1	274	285			PEAKS DB
34	39	Q9AT06|Q9AT06_CICAR	R.SVLGIILGGGAGTR.L	Y	53.57	1269.74	14	-4	635.877	2	56.36	241160	1	20721	Banda_10_827.raw	1	1	85	98			PEAKS DB
34	39	Q9AT06|Q9AT06_CICAR	R.ESDADITVAALPM(+15.99)DELR.A	Y	42.51	1860.88	17	23	931.448	2	47.89	971220	1	16415	Banda_10_827.raw	1	1	226	242	Oxidation (M)	M13:Oxidation (M):1000.00	PEAKS DB
37	40	A0A1S2YUA0|A0A1S2YUA0_CICAR	R.Q(-17.03)LAALHALGNISGETR.S	Y	61.86	1632.86	16	1	817.437	2	53.74	414810	1	19660	Banda_10_827.raw	1	1	360	375	Pyro-glu from Q	Q1:Pyro-glu from Q:1000.00	PEAKS DB
37	40	A0A1S2YUA0|A0A1S2YUA0_CICAR	R.QEIINLVADPSTETTK.I	Y	56.49	1757.9	16	23	879.962	2	48.11	1052200	1	16526	Banda_10_827.raw	1	1	445	460			PEAKS DB
37	40	A0A1S2YUA0|A0A1S2YUA0_CICAR	R.VSADPSFAGIAAK.L	Y	48.25	1232.64	13	9	617.328	2	44.64	1385700	1	14515	Banda_10_827.raw	1	1	483	495			PEAKS DB
37	40	A0A1S2YUA0|A0A1S2YUA0_CICAR	K.LTPSGLFLSVLQQDSEIR.I	Y	46.77	2002.07	18	9	1002.04	2	58.3	89966	1	21690	Banda_10_827.raw	1	1	404	421			PEAKS DB
37	40	A0A1S2YUA0|A0A1S2YUA0_CICAR	R.SENDIILDAEAEENLLR.L	Y	46.42	1942.95	17	9	972.482	2	54.13	386820	1	19615	Banda_10_827.raw	1	1	376	392			PEAKS DB
48	63	A0A1S2XVG1|A0A1S2XVG1_CICAR	R.ATPAQVLANAFGLR.Q	Y	83.71	1427.79	14	-45	714.898	2	57.5	3276300	1	21581	Banda_10_827.raw	2	2	494	507			PEAKS DB
48	63	A0A1S2XVG1|A0A1S2XVG1_CICAR	R.ISTVNSLTLPILSYLR.L	Y	60.31	1789.03	16	10	895.526	2	58.45	925950	1	21705	Banda_10_827.raw	1	1	383	398			PEAKS DB
47	47	A0A1S2Y7P2|A0A1S2Y7P2_CICAR	K.ALIDATASDSSLEEETGVR.I	Y	70.92	1962.94	19	14	982.478	2	47.4	1758700	1	15903	Banda_10_827.raw	1	1	280	298			PEAKS DB
47	47	A0A1S2Y7P2|A0A1S2Y7P2_CICAR	R.YATNAVTSFIFR.E	Y	53.16	1388.71	12	12	695.362	2	54.89	836640	1	20028	Banda_10_827.raw	1	1	387	398			PEAKS DB
47	47	A0A1S2Y7P2|A0A1S2Y7P2_CICAR	R.NYSTIVAFAVGK.R	Y	51.26	1268.68	12	4	635.346	2	53.47	1143900	1	19314	Banda_10_827.raw	1	1	62	73			PEAKS DB
47	47	A0A1S2Y7P2|A0A1S2Y7P2_CICAR	R.NDTAC(+57.02)GSTIGPILASGVGIR.T	Y	44.46	1957.99	20	-18	980	2	51.38	34507	1	18154	Banda_10_827.raw	1	1	415	434	Carbamidomethylation	C5:Carbamidomethylation:1000.00	PEAKS DB
49	53	A0A1S2XW85|A0A1S2XW85_CICAR	K.EALQAEIGLPVDR.S	Y	65.64	1409.75	13	8	705.884	2	49.82	1729100	1	17066	Banda_10_827.raw	1	1	384	396			PEAKS DB
49	53	A0A1S2XW85|A0A1S2XW85_CICAR	K.IIAGADFIVIPSR.F	Y	60.58	1370.79	13	0	686.403	2	53.86	117900	1	19652	Banda_10_827.raw	1	1	469	481			PEAKS DB
49	53	A0A1S2XW85|A0A1S2XW85_CICAR	R.SIPLIGFIGR.L	Y	52.21	1071.64	10	1	536.829	2	55.78	623080	1	20444	Banda_10_827.raw	1	1	397	406			PEAKS DB
49	53	A0A1S2XW85|A0A1S2XW85_CICAR	R.SSLDFFDGYDKPVK.G	Y	46.18	1616.77	14	10	539.932	3	53.65	85690	1	19430	Banda_10_827.raw	1	1	286	299			PEAKS DB
45	49	Q9M3Z6|Q9M3Z6_CICAR	R.SDAFATEFDLEAEEYVPLPK.G	Y	69.98	2270.06	20	4	1136.04	2	55.32	781430	1	20258	Banda_10_827.raw	1	1	209	228			PEAKS DB
45	49	Q9M3Z6|Q9M3Z6_CICAR	R.TQTYGPAEIIQILAIR.A	Y	49.97	1786	16	16	596.341	3	58.13	205250	1	21717	Banda_10_827.raw	1	1	365	380			PEAKS DB
45	49	Q9M3Z6|Q9M3Z6_CICAR	K.VAVGDVIYIEANSGAVK.R	Y	49.69	1703.91	17	16	852.963	2	51.31	782170	1	17945	Banda_10_827.raw	1	1	188	204			PEAKS DB
45	49	Q9M3Z6|Q9M3Z6_CICAR	K.LDPTIYDALIK.E	Y	48.29	1260.7	11	9	631.356	2	53.65	1699100	1	19445	Banda_10_827.raw	1	1	175	185			PEAKS DB
39	58	A0A1S2YCQ2|A0A1S2YCQ2_CICAR	R.IVGVSEETTTGVK.R	N	75.33	1318.7	13	4	660.357	2	37.52	492900	1	11454	Banda_10_827.raw	1	1	199	211			PEAKS DB
39	58	A0A1S2YCQ2|A0A1S2YCQ2_CICAR	R.IVGVSEETTTGVKR.L	N	44.62	1474.8	14	-13	492.606	3	50.17	1403100	1	17341	Banda_10_827.raw	1	1	199	212			PEAKS DB
39	58	A0A1S2YCQ2|A0A1S2YCQ2_CICAR	R.TEFGPSQPFK.G	N	42.7	1136.55	10	12	569.283	2	45.08	0	1	14812	Banda_10_827.raw	0	0	44	53			PEAKS DB
39	58	A0A1S2YCQ2|A0A1S2YCQ2_CICAR	M.A(+42.01)LLVETTTSGR.E	Y	41.48	1188.63	11	5	595.325	2	45.48	1660700	1	14949	Banda_10_827.raw	1	1	2	12	Acetylation (Protein N-term)	A1:Acetylation (Protein N-term):1000.00	PEAKS DB
51	65	A0A1S2XVM2|A0A1S2XVM2_CICAR	K.IAVVTGGDSGIGR.S	Y	70.45	1200.65	13	50	601.333	2	43.66	1583500	1	12398	Banda_10_827.raw	1	1	75	87			PEAKS DB
51	65	A0A1S2XVM2|A0A1S2XVM2_CICAR	K.EGSSIINTTSVNAYK.G	Y	42.34	1582.78	15	12	792.4	2	41.88	1663700	1	13264	Banda_10_827.raw	1	1	206	220			PEAKS DB
43	54	A0A1S2YPX2|A0A1S2YPX2_CICAR	K.IQDVATGAGEYTAEK.A	Y	58.49	1551.74	15	11	776.879	2	34.18	866260	1	9747	Banda_10_827.raw	1	1	374	388			PEAKS DB
43	54	A0A1S2YPX2|A0A1S2YPX2_CICAR	K.EAAETWTGWAK.E	Y	43.92	1248.58	11	-5	625.296	2	49.96	512970	1	17281	Banda_10_827.raw	1	1	63	73			PEAKS DB
29	48	A0A1S2YZ56|A0A1S2YZ56_CICAR	K.Q(-17.03)GDVFLVPR.F	Y	52	1012.53	9	10	507.275	2	46.65	7565200	1	15707	Banda_10_827.raw	1	1	380	388	Pyro-glu from Q	Q1:Pyro-glu from Q:1000.00	PEAKS DB
29	48	A0A1S2YZ56|A0A1S2YZ56_CICAR	K.Q(-17.03)IVATSLC(+57.02)VSK.R	Y	47.65	1187.62	11	13	594.819	2	40.29	2355800	1	12543	Banda_10_827.raw	1	1	432	442	Pyro-glu from Q; Carbamidomethylation	Q1:Pyro-glu from Q:1000.00;C8:Carbamidomethylation:1000.00	PEAKS DB
29	48	A0A1S2YZ56|A0A1S2YZ56_CICAR	K.GSVLQILDK.Q	Y	45.8	971.565	9	-12	486.789	2	53.15	13943000	1	19000	Banda_10_827.raw	1	1	423	431			PEAKS DB
29	48	A0A1S2YZ56|A0A1S2YZ56_CICAR	K.LQTYNIFDNDPDFK.N	Y	45.42	1728.8	14	17	865.408	2	52.73	5816800	1	19252	Banda_10_827.raw	1	1	290	303			PEAKS DB
66	187	A0A1S2Y738|A0A1S2Y738_CICAR	K.LNVVLSGATWLEPDPISR.C	Y	70.7	1966.05	18	15	984.035	2	55.27	504550	1	20162	Banda_10_827.raw	1	1	337	354			PEAKS DB
66	187	A0A1S2Y738|A0A1S2Y738_CICAR	R.SPEYLALNEAVIALVK.H	Y	62.76	1728.97	16	13	865.491	2	57.09	1240800	1	21106	Banda_10_827.raw	1	1	284	299			PEAKS DB
50	66	A0A067XTY1|A0A067XTY1_CICAR	K.VTIITTPSNAQLFDK.T	Y	64.87	1646.89	15	13	824.452	2	50.08	5962100	1	17509	Banda_10_827.raw	1	1	38	52			PEAKS DB
50	66	A0A067XTY1|A0A067XTY1_CICAR	K.SLM(+15.99)DGDGGGNEIR.K	Y	46.56	1335.57	13	1	668.794	2	31.83	960650	1	8942	Banda_10_827.raw	1	1	430	442	Oxidation (M)	M3:Oxidation (M):1000.00	PEAKS DB
41	72	A0A1S2YM01|A0A1S2YM01_CICAR	R.IDVYYNEAGGGR.Y	Y	63.56	1312.6	12	-45	657.307	2	39.58	417420	1	12302	Banda_10_827.raw	1	1	47	58			PEAKS DB
41	72	A0A1S2YM01|A0A1S2YM01_CICAR	R.YGGDSDLQLER.I	Y	43.59	1251.57	11	9	626.794	2	40.72	1190100	1	12868	Banda_10_827.raw	1	1	36	46			PEAKS DB
53	87	A0A1S2YP92|A0A1S2YP92_CICAR	R.GTGGDPFGAPTK.H	Y	73.85	1103.52	12	5	552.77	2	36.56	4725900	1	10980	Banda_10_827.raw	1	1	97	108			PEAKS DB
53	87	A0A1S2YP92|A0A1S2YP92_CICAR	R.YQSFDTEIGAQIEAGK.A	Y	45.97	1755.83	16	10	878.924	2	48.85	651320	1	16592	Banda_10_827.raw	1	1	430	445			PEAKS DB
60	98	A0A1S2Y9I6|A0A1S2Y9I6_CICAR	R.YPTSNDFGSEIIPSAIR.E	Y	65.89	1865.92	17	4	933.966	2	52.07	926810	1	18443	Banda_10_827.raw	1	1	317	333			PEAKS DB
60	98	A0A1S2Y9I6|A0A1S2Y9I6_CICAR	K.SFYDANLALTEESPK.F	Y	47.87	1683.8	15	8	842.908	2	50.05	583570	1	17269	Banda_10_827.raw	1	1	354	368			PEAKS DB
61	102	A0A3Q7XWI9|A0A3Q7XWI9_CICAR	R.IEEELGAEAVYAGTNFR.T	Y	50.5	1867.9	17	-19	934.953	2	50.26	61154	1	17531	Banda_10_827.raw	1	1	422	438			PEAKS DB
61	102	A0A3Q7XWI9|A0A3Q7XWI9_CICAR	K.VNQIGSVTESIEAVR.M	Y	50.41	1600.84	15	8	801.429	2	49.14	2076300	1	16644	Banda_10_827.raw	1	1	353	367			PEAKS DB

## Sheet: 9
Protein Group	Protein ID	Protein Accession	Peptide	Unique	Score	Mass	Length	ppm	m/z	z	RT	Area Sample 2	Fraction	Scan	Source File	#Feature	#Feature Sample 1	Start	End	PTM	AScore	Found By
2	2	A0A1S2XVJ8|A0A1S2XVJ8_CICAR	R.KEQDQDEDENENPYVFK.S	Y	104.57	2125.91	17	7	1063.96	2	47.26	321490000	1	15874	Banda_11_842.raw	3	3	74	90			PEAKS DB
2	2	A0A1S2XVJ8|A0A1S2XVJ8_CICAR	R.VPAGTPMYLVNR.D	Y	99.47	1316.69	12	-2	659.353	2	46.51	96127000	1	15509	Banda_11_842.raw	1	1	178	189			PEAKS DB
2	2	A0A1S2XVJ8|A0A1S2XVJ8_CICAR	R.NPESVLTAFSSK.V	Y	90.85	1278.65	12	17	640.331	2	49.26	980020000	1	16896	Banda_11_842.raw	4	4	223	234			PEAKS DB
2	2	A0A1S2XVJ8|A0A1S2XVJ8_CICAR	K.IAFVTEGEGDFEM(+15.99)AC(+57.02)PHLK.E	Y	81.93	2165.98	19	11	723	3	51.77	49847000	1	18715	Banda_11_842.raw	1	1	344	362	Oxidation (M); Carbamidomethylation	M13:Oxidation (M):1000.00;C15:Carbamidomethylation:1000.00	PEAKS DB
2	2	A0A1S2XVJ8|A0A1S2XVJ8_CICAR	R.DEEFFFPYEEGEEEER.A	Y	79.28	2079.82	16	6	1040.92	2	51.09	46526000	1	18333	Banda_11_842.raw	1	1	452	467			PEAKS DB
2	2	A0A1S2XVJ8|A0A1S2XVJ8_CICAR	R.NIENYGLAVLEVK.G	Y	77.44	1460.79	13	17	731.402	2	52.85	50320000	1	19579	Banda_11_842.raw	3	3	120	132			PEAKS DB
2	2	A0A1S2XVJ8|A0A1S2XVJ8_CICAR	R.PSFSNQYGSLFEVGPSEEK.S	Y	74.81	2100.96	19	19	1051.49	2	50.01	29609000	1	17622	Banda_11_842.raw	1	1	294	312			PEAKS DB
2	2	A0A1S2XVJ8|A0A1S2XVJ8_CICAR	K.EDVHGLAPK.R	Y	74.53	964.498	9	8	483.257	2	45.87	162510000	1	15180	Banda_11_842.raw	3	3	265	273			PEAKS DB
2	2	A0A1S2XVJ8|A0A1S2XVJ8_CICAR	R.VPAGTPMYLVNRDENEK.L	Y	74.43	1931.94	17	15	966.979	2	49.33	89442000	1	16945	Banda_11_842.raw	2	2	178	194			PEAKS DB
2	2	A0A1S2XVJ8|A0A1S2XVJ8_CICAR	S.FSNQYGSLFEVGPSEEK.S	Y	73.18	1916.88	17	18	959.449	2	49.23	5331200	1	17432	Banda_11_842.raw	1	1	296	312			PEAKS DB
2	2	A0A1S2XVJ8|A0A1S2XVJ8_CICAR	K.GC(+57.02)M(+15.99)STIYYNTNANK.I	Y	73.09	1651.7	14	26	826.858	2	30.36	70966000	1	7896	Banda_11_842.raw	2	2	330	343	Carbamidomethylation; Oxidation (M)	C2:Carbamidomethylation:1000.00;M3:Oxidation (M):1000.00	PEAKS DB
2	2	A0A1S2XVJ8|A0A1S2XVJ8_CICAR	R.AKEVAYEYPAEK.V	Y	71.74	1396.69	12	6	699.351	2	46.46	34145000	1	15360	Banda_11_842.raw	1	1	433	444			PEAKS DB
2	2	A0A1S2XVJ8|A0A1S2XVJ8_CICAR	K.AIIGLVMEDK.T	Y	70.38	1087.59	10	8	544.805	2	51.67	237310000	1	18670	Banda_11_842.raw	2	2	155	164			PEAKS DB
2	2	A0A1S2XVJ8|A0A1S2XVJ8_CICAR	R.VPAGTPM(+15.99)YLVNR.D	Y	70.23	1332.69	12	6	667.351	2	41.14	313780000	1	13034	Banda_11_842.raw	1	1	178	189	Oxidation (M)	M7:Oxidation (M):1000.00	PEAKS DB
2	2	A0A1S2XVJ8|A0A1S2XVJ8_CICAR	K.SGLDELNLMLTLANITK.G	Y	69.84	1844.99	17	14	923.504	2	59.74	3020900	1	22764	Banda_11_842.raw	2	2	313	329			PEAKS DB
2	2	A0A1S2XVJ8|A0A1S2XVJ8_CICAR	K.EVAYEYPAEK.V	Y	69.22	1197.56	10	14	599.786	2	32.95	633240000	1	9677	Banda_11_842.raw	4	4	435	444			PEAKS DB
2	2	A0A1S2XVJ8|A0A1S2XVJ8_CICAR	K.GC(+57.02)MSTIYYNTNANK.I	Y	68.28	1635.7	14	17	818.86	2	39.12	23109000	1	12179	Banda_11_842.raw	1	1	330	343	Carbamidomethylation	C2:Carbamidomethylation:1000.00	PEAKS DB
2	2	A0A1S2XVJ8|A0A1S2XVJ8_CICAR	K.ISKEDVHGLAPK.R	Y	67.34	1292.71	12	-1	647.362	2	50.41	164260000	1	17577	Banda_11_842.raw	2	2	262	273			PEAKS DB
2	2	A0A1S2XVJ8|A0A1S2XVJ8_CICAR	R.FNLESGDIMR.V	Y	67.18	1180.55	10	17	591.286	2	48.22	87727000	1	16663	Banda_11_842.raw	2	2	168	177			PEAKS DB
2	2	A0A1S2XVJ8|A0A1S2XVJ8_CICAR	A.SAPVNLEAFFEPGGR.N	Y	66.6	1589.78	15	10	795.9	2	53.78	9279600	1	19648	Banda_11_842.raw	2	2	208	222			PEAKS DB
2	2	A0A1S2XVJ8|A0A1S2XVJ8_CICAR	K.SGLDELNLM(+15.99)LTLANITK.G	Y	66.25	1860.99	17	20	931.502	2	55.3	699300	1	20489	Banda_11_842.raw	1	1	313	329	Oxidation (M)	M9:Oxidation (M):1000.00	PEAKS DB
2	2	A0A1S2XVJ8|A0A1S2XVJ8_CICAR	K.AIIGLVM(+15.99)EDK.T	Y	66.17	1103.59	10	10	552.803	2	47.27	200680000	1	16061	Banda_11_842.raw	2	2	155	164	Oxidation (M)	M7:Oxidation (M):1000.00	PEAKS DB
2	2	A0A1S2XVJ8|A0A1S2XVJ8_CICAR	K.EVAYEYPAEKVDEIFER.D	Y	65.98	2085.99	17	9	1044	2	53.44	14283000	1	19749	Banda_11_842.raw	2	2	435	451			PEAKS DB
2	2	A0A1S2XVJ8|A0A1S2XVJ8_CICAR	E.QDQDEDENENPYVFK.S	Y	65.88	1868.77	15	15	935.394	2	37.15	75710	1	11148	Banda_11_842.raw	1	1	76	90			PEAKS DB
2	2	A0A1S2XVJ8|A0A1S2XVJ8_CICAR	R.SIWPFGGQFK.G	Y	63.96	1165.59	10	10	583.804	2	54.95	166750000	1	20633	Banda_11_842.raw	1	1	275	284			PEAKS DB
2	2	A0A1S2XVJ8|A0A1S2XVJ8_CICAR	K.AGMVFVVPAGHPFVTMASK.K	Y	62.78	1945	19	28	649.341	3	54.47	37498000	1	19978	Banda_11_842.raw	1	1	380	398			PEAKS DB
2	2	A0A1S2XVJ8|A0A1S2XVJ8_CICAR	L.SASAPVNLEAFFEPGGR.N	Y	61.25	1747.85	17	19	874.935	2	53.64	1449500	1	19838	Banda_11_842.raw	1	1	206	222			PEAKS DB
2	2	A0A1S2XVJ8|A0A1S2XVJ8_CICAR	K.EQDQDEDENENPYVFK.S	Y	61.04	1997.81	16	11	999.915	2	37.84	148580000	1	11603	Banda_11_842.raw	1	1	75	90			PEAKS DB
2	2	A0A1S2XVJ8|A0A1S2XVJ8_CICAR	F.TNRPSFSNQYGSLFEVGPSEEK.S	Y	60.68	2472.16	22	-1	825.059	3	52.18	77129000	1	19017	Banda_11_842.raw	2	2	291	312			PEAKS DB
2	2	A0A1S2XVJ8|A0A1S2XVJ8_CICAR	K.AIIGLVMEDKTER.F	Y	56.49	1473.79	13	9	492.27	3	53.02	4988800	1	19153	Banda_11_842.raw	1	1	155	167			PEAKS DB
2	2	A0A1S2XVJ8|A0A1S2XVJ8_CICAR	K.E(-18.01)QDQDEDENENPYVFK.S	Y	56.27	1979.8	16	7	990.909	2	36.56	3471800	1	10782	Banda_11_842.raw	1	1	75	90	Pyro-glu from E	E1:Pyro-glu from E:1000.00	PEAKS DB
2	2	A0A1S2XVJ8|A0A1S2XVJ8_CICAR	R.NIVSALDK.R	Y	55.63	858.481	8	13	859.49	1	46.12	199020000	1	15361	Banda_11_842.raw	2	2	424	431			PEAKS DB
2	2	A0A1S2XVJ8|A0A1S2XVJ8_CICAR	F.SNQYGSLFEVGPSEEK.S	Y	54.62	1769.81	16	5	885.913	2	47.22	2902700	1	16151	Banda_11_842.raw	1	1	297	312			PEAKS DB
2	2	A0A1S2XVJ8|A0A1S2XVJ8_CICAR	R.IDTEDGR.V	Y	53.52	804.361	7	96	805.376	1	17.82	134770000	1	2699	Banda_11_842.raw	1	1	98	104			PEAKS DB
2	2	A0A1S2XVJ8|A0A1S2XVJ8_CICAR	K.AGM(+15.99)VFVVPAGHPFVT.M	Y	50.52	1543.79	15	23	772.902	2	50.59	629550	1	17939	Banda_11_842.raw	1	1	380	394	Oxidation (M)	M3:Oxidation (M):1000.00	PEAKS DB
2	2	A0A1S2XVJ8|A0A1S2XVJ8_CICAR	K.VDEIFER.D	Y	49.92	906.445	7	8	907.453	1	44.92	122150000	1	14660	Banda_11_842.raw	2	2	445	451			PEAKS DB
2	2	A0A1S2XVJ8|A0A1S2XVJ8_CICAR	K.AIIGLVM(+15.99)EDKTER.F	Y	49.34	1489.78	13	4	497.601	3	51.13	46353000	1	18027	Banda_11_842.raw	2	2	155	167	Oxidation (M)	M7:Oxidation (M):1000.00	PEAKS DB
2	2	A0A1S2XVJ8|A0A1S2XVJ8_CICAR	K.SSSTSYHK.I	Y	49.28	895.404	8	-1	448.709	2	33.76	53245000	1	9497	Banda_11_842.raw	1	1	366	373			PEAKS DB
2	2	A0A1S2XVJ8|A0A1S2XVJ8_CICAR	K.VDEIFERDEEFF.F	Y	48.99	1573.69	12	23	787.856	2	53.93	4358800	1	19729	Banda_11_842.raw	1	1	445	456			PEAKS DB
2	2	A0A1S2XVJ8|A0A1S2XVJ8_CICAR	R.DEEFFFPYEEGEEEERAD.A	Y	48.8	2265.89	18	6	1133.95	2	51.1	11881000	1	18357	Banda_11_842.raw	1	1	452	469			PEAKS DB
2	2	A0A1S2XVJ8|A0A1S2XVJ8_CICAR	K.RKEQDQDEDENENPYVFK.S	Y	47.72	2282.01	18	11	761.678	3	51.21	13253000	1	18629	Banda_11_842.raw	1	1	73	90			PEAKS DB
2	2	A0A1S2XVJ8|A0A1S2XVJ8_CICAR	D.QDEDENENPYVFK.S	Y	47.67	1625.68	13	9	813.85	2	37.29	1495500	1	11551	Banda_11_842.raw	1	1	78	90			PEAKS DB
2	2	A0A1S2XVJ8|A0A1S2XVJ8_CICAR	K.E(-18.01)DVHGLAPK.R	Y	47.56	946.487	9	2	474.251	2	31.96	37468000	1	9583	Banda_11_842.raw	2	2	265	273	Pyro-glu from E	E1:Pyro-glu from E:1000.00	PEAKS DB
2	2	A0A1S2XVJ8|A0A1S2XVJ8_CICAR	K.AGMVFVVPAGHPFVTM(+15.99)ASK.K	Y	44.06	1960.99	19	14	654.672	3	53.16	113030000	1	19624	Banda_11_842.raw	1	1	380	398	Oxidation (M)	M16:Oxidation (M):27.48	PEAKS DB
[truncated: 329 more rows]

## Sheet: 10
Protein Group	Protein ID	Protein Accession	Peptide	Unique	Score	Mass	Length	ppm	m/z	z	RT	Area Sample 2	Fraction	Scan	Source File	#Feature	#Feature Sample 1	Start	End	PTM	AScore	Found By
[truncated: 310 more rows]

[truncated: 10 more sheets: 11, 12, 13, 14, 15, 16, 17, 18, 19, 20]
